# Supplementary material for: Complementary insights into gut viral genomes: a comparative benchmark of short- and long-Read metagenomes using diverse assemblers and binners
Source: Research Square preprint supplement (doi:10.21203/rs.3.rs-5088576/v1), 2024-10-30
Supplement: Supplementary file 1 [file 27ee4a8bae4c8d24b75a3d8e.xlsx]

## Sheet: Sheet1
Assembly enhancement tools	Orginal assembled viral contigs	Impoved contigs
COBRA	18160	460
Phables	13791	262
