# Supplementary material for: Complementary insights into gut viral genomes: a comparative benchmark of short- and long-Read metagenomes using diverse assemblers and binners
Source: Research Square preprint supplement (doi:10.21203/rs.3.rs-5088576/v1), 2024-10-30
Supplement: Supplementary file 3 [file 36ad38d5565bbe7dcf2e67b2.xlsx]

## Sheet: vOTUs number
Overview of the number of differently processed vOTU datasets
	Number of vOTUs
Total vOTUs	366519		HQ:high quality
HQ vOTUs	37790		NR:non-redundant
NR-HQ vOTUs	17931		TA: taxonomic anatation
TA vOTUs	6000

## Sheet: All vOTUs 
contig_id	contig_length	provirus	proviral_length	gene_count	viral_genes	host_genes	checkv_quality	miuvig_quality	completeness	completeness_method
A01_idba_3	173053	No	NA	201	45	4	Complete	High-quality	100	DTR
A01_idba_10	150676	No	NA	154	21	4	Medium-quality	Genome-fragment	80.31	AAI-based
A01_idba_16	138392	No	NA	184	34	7	Complete	High-quality	100	DTR
A01_idba_23	118229	Yes	32639	134	17	59	High-quality	High-quality	92	AAI-based
A01_idba_25	113823	No	NA	131	5	88	High-quality	High-quality	96.77	HMM-based
A01_idba_28	111807	No	NA	121	22	4	Medium-quality	Genome-fragment	63.82	AAI-based
A01_idba_32	108557	No	NA	143	29	3	Medium-quality	Genome-fragment	73.68	AAI-based
A01_idba_33	105209	Yes	23475	90	6	44	Low-quality	Genome-fragment	37.67	HMM-based
A01_idba_34	102892	No	NA	133	19	4	Complete	High-quality	100	ITR
A01_idba_36	99605	No	NA	73	0	51	Not-determined	Genome-fragment	NA	NA
A01_idba_37	98901	No	NA	116	18	1	High-quality	High-quality	99.84	AAI-based
A01_idba_43	94811	No	NA	87	11	5	High-quality	High-quality	98.67	AAI-based
A01_idba_51	85952	No	NA	114	13	2	Complete	High-quality	100	DTR
A01_idba_55	82426	No	NA	137	22	0	Complete	High-quality	100	DTR
A01_idba_57	81326	No	NA	63	0	39	Not-determined	Genome-fragment	NA	NA
A01_idba_58	80389	No	NA	126	22	2	Complete	High-quality	100	DTR
A01_idba_59	80154	No	NA	114	22	2	Low-quality	Genome-fragment	45.84	AAI-based
A01_idba_60	79215	No	NA	107	11	1	Complete	High-quality	100	DTR
A01_idba_61	78986	No	NA	95	12	0	Complete	High-quality	100	DTR
A01_idba_70	73792	No	NA	111	21	2	Complete	High-quality	100	DTR
A01_idba_73	72949	No	NA	90	13	1	Complete	High-quality	100	DTR
A01_idba_76	71760	Yes	17105	75	9	36	Low-quality	Genome-fragment	39.98	AAI-based
A01_idba_77	71497	No	NA	103	14	2	Medium-quality	Genome-fragment	60.47	AAI-based
A01_idba_86	66171	No	NA	76	21	1	Low-quality	Genome-fragment	49.81	AAI-based
A01_idba_89	64492	No	NA	55	0	46	Not-determined	Genome-fragment	NA	NA
A01_idba_90	63645	No	NA	72	0	62	Not-determined	Genome-fragment	NA	NA
A01_idba_91	63294	No	NA	97	31	1	High-quality	High-quality	98.14	AAI-based
A01_idba_92	61756	No	NA	80	7	0	Low-quality	Genome-fragment	35.24	AAI-based
A01_idba_100	60271	No	NA	82	18	1	High-quality	High-quality	100	AAI-based
A01_idba_101	60059	No	NA	77	18	4	High-quality	High-quality	100	AAI-based
A01_idba_102	59718	No	NA	87	36	0	Complete	High-quality	100	DTR
A01_idba_107	58564	No	NA	76	19	2	Medium-quality	Genome-fragment	87.85	AAI-based
A01_idba_109	58341	No	NA	107	17	1	High-quality	High-quality	100	AAI-based
A01_idba_112	57735	No	NA	102	21	5	Complete	High-quality	100	DTR
A01_idba_113	57714	No	NA	85	16	2	High-quality	High-quality	100	AAI-based
A01_idba_115	57299	No	NA	97	18	3	High-quality	High-quality	95.46	AAI-based
A01_idba_118	56118	No	NA	86	34	0	High-quality	High-quality	90.12	AAI-based
A01_idba_119	56010	No	NA	37	0	30	Not-determined	Genome-fragment	NA	NA
A01_idba_120	55743	No	NA	40	8	0	Medium-quality	Genome-fragment	55.97	AAI-based
A01_idba_122	55275	No	NA	46	1	9	Medium-quality	Genome-fragment	74.52	AAI-based
A01_idba_125	53949	No	NA	61	14	0	Medium-quality	Genome-fragment	55.61	AAI-based
A01_idba_126	53834	No	NA	82	22	2	Complete	High-quality	100	DTR
A01_idba_127	53578	No	NA	33	2	0	Low-quality	Genome-fragment	29.42	AAI-based
A01_idba_128	53575	No	NA	92	10	2	Low-quality	Genome-fragment	40.33	AAI-based
A01_idba_129	53500	No	NA	63	3	3	Complete	High-quality	100	DTR
A01_idba_131	52975	No	NA	82	29	0	Complete	High-quality	100	DTR
A01_idba_132	51932	No	NA	81	14	0	Complete	High-quality	100	DTR
A01_idba_137	50720	No	NA	87	18	0	High-quality	High-quality	99.56	AAI-based
A01_idba_139	50608	No	NA	46	0	27	Not-determined	Genome-fragment	NA	NA
A01_idba_140	50431	No	NA	65	7	0	Medium-quality	Genome-fragment	81.95	AAI-based
A01_idba_145	49348	No	NA	38	7	0	Low-quality	Genome-fragment	46.42	AAI-based
A01_idba_148	48405	No	NA	86	20	0	Complete	High-quality	100	DTR
A01_idba_149	48396	No	NA	67	10	2	High-quality	High-quality	97.32	AAI-based
A01_idba_157	47026	No	NA	62	16	0	Complete	High-quality	100	DTR
A01_idba_158	46550	No	NA	44	21	0	Low-quality	Genome-fragment	39.22	AAI-based
A01_idba_159	46274	No	NA	78	18	1	High-quality	High-quality	100	AAI-based
A01_idba_160	46167	No	NA	60	5	0	High-quality	High-quality	100	AAI-based
A01_idba_162	46092	No	NA	77	18	0	Complete	High-quality	100	DTR
A01_idba_163	46069	No	NA	79	16	0	Complete	High-quality	100	DTR
A01_idba_169	45289	No	NA	69	12	1	High-quality	High-quality	98.75	AAI-based
A01_idba_171	45005	No	NA	62	12	3	High-quality	High-quality	94.69	AAI-based
A01_idba_172	45003	No	NA	47	7	4	Medium-quality	Genome-fragment	78.95	HMM-based
A01_idba_175	44836	No	NA	81	13	1	High-quality	High-quality	100	AAI-based
A01_idba_178	44469	No	NA	65	6	1	Low-quality	Genome-fragment	44.91	AAI-based
A01_idba_179	44443	No	NA	63	28	0	High-quality	High-quality	97.01	AAI-based
A01_idba_180	44432	No	NA	58	19	1	Medium-quality	Genome-fragment	89.35	AAI-based
A01_idba_182	44256	No	NA	79	18	0	Complete	High-quality	100	DTR
A01_idba_186	43313	No	NA	60	9	1	Complete	High-quality	100	DTR
A01_idba_188	43039	No	NA	36	0	26	Not-determined	Genome-fragment	NA	NA
A01_idba_191	42868	No	NA	51	7	1	High-quality	High-quality	94.91	AAI-based
A01_idba_197	42217	No	NA	62	8	1	Complete	High-quality	100	DTR
A01_idba_200	41868	No	NA	43	9	1	High-quality	High-quality	99.32	AAI-based
A01_idba_202	41539	No	NA	70	17	0	High-quality	High-quality	95.72	AAI-based
A01_idba_203	41429	No	NA	51	6	0	Complete	High-quality	100	DTR
A01_idba_213	40443	No	NA	46	7	1	Low-quality	Genome-fragment	41.69	AAI-based
A01_idba_216	39747	No	NA	43	0	15	Not-determined	Genome-fragment	NA	NA
A01_idba_217	39570	No	NA	49	10	1	Complete	High-quality	100	DTR
A01_idba_218	39565	Yes	22969	53	11	8	Medium-quality	Genome-fragment	57.8	AAI-based
A01_idba_220	39436	No	NA	35	0	28	Not-determined	Genome-fragment	NA	NA
A01_idba_223	39204	No	NA	31	0	27	Low-quality	Genome-fragment	12.41	AAI-based
A01_idba_224	39191	No	NA	58	6	0	Low-quality	Genome-fragment	20.93	AAI-based
A01_idba_225	39149	No	NA	59	9	3	High-quality	High-quality	100	AAI-based
A01_idba_228	38785	No	NA	54	26	0	Complete	High-quality	100	DTR
A01_idba_229	38778	No	NA	50	18	1	High-quality	High-quality	96.36	AAI-based
A01_idba_230	38468	No	NA	51	7	2	Medium-quality	Genome-fragment	66.06	AAI-based
A01_idba_231	38341	No	NA	47	7	0	Complete	High-quality	100	DTR
A01_idba_232	38330	No	NA	41	7	1	Medium-quality	Genome-fragment	66.14	AAI-based
A01_idba_233	38242	No	NA	36	0	21	Low-quality	Genome-fragment	13.38	AAI-based
A01_idba_238	37557	No	NA	58	24	0	Low-quality	Genome-fragment	32.98	AAI-based
A01_idba_239	37322	No	NA	58	23	0	High-quality	High-quality	100	AAI-based
A01_idba_240	37205	No	NA	51	13	0	High-quality	High-quality	91.46	AAI-based
A01_idba_241	37116	No	NA	66	22	1	Complete	High-quality	100	DTR
A01_idba_243	37077	No	NA	59	25	0	Medium-quality	Genome-fragment	79.25	AAI-based
A01_idba_244	37034	No	NA	25	2	0	Low-quality	Genome-fragment	36.05	AAI-based
A01_idba_246	36796	No	NA	73	11	2	Medium-quality	Genome-fragment	58.89	AAI-based
A01_idba_248	36418	No	NA	67	19	1	High-quality	High-quality	99.02	AAI-based
A01_idba_249	36380	No	NA	25	0	8	Low-quality	Genome-fragment	47.96	AAI-based
A01_idba_251	35933	No	NA	45	10	1	Complete	High-quality	100	DTR
A01_idba_256	35296	No	NA	51	20	0	Complete	High-quality	100	DTR
A01_idba_258	35225	No	NA	55	15	0	Complete	High-quality	100	DTR
A01_idba_259	35184	No	NA	60	19	1	Complete	High-quality	100	DTR
A01_idba_260	35164	No	NA	21	0	7	Low-quality	Genome-fragment	45.12	AAI-based
A01_idba_261	35136	No	NA	37	3	0	Low-quality	Genome-fragment	33.21	AAI-based
A01_idba_262	34850	Yes	32413	53	20	2	Medium-quality	Genome-fragment	74.23	AAI-based
A01_idba_263	34802	No	NA	63	18	0	Complete	High-quality	100	DTR
A01_idba_264	34720	No	NA	46	4	1	Medium-quality	Genome-fragment	53.58	HMM-based
A01_idba_269	34206	Yes	27439	51	25	4	Medium-quality	Genome-fragment	59.56	AAI-based
A01_idba_272	33749	No	NA	60	19	1	High-quality	High-quality	96.77	AAI-based
A01_idba_276	33468	No	NA	38	2	2	Low-quality	Genome-fragment	30.18	AAI-based
A01_idba_278	33246	No	NA	58	22	0	High-quality	High-quality	100	AAI-based
A01_idba_288	32256	No	NA	31	0	24	Not-determined	Genome-fragment	NA	NA
A01_idba_290	31928	No	NA	39	11	0	Medium-quality	Genome-fragment	62.94	AAI-based
A01_idba_297	31519	No	NA	42	8	2	Medium-quality	Genome-fragment	62.03	AAI-based
A01_idba_298	31470	No	NA	49	13	0	High-quality	High-quality	92.96	AAI-based
A01_idba_303	30982	No	NA	54	17	0	Medium-quality	Genome-fragment	83.06	AAI-based
A01_idba_306	30745	No	NA	46	0	41	Not-determined	Genome-fragment	NA	NA
A01_idba_309	30452	No	NA	23	5	2	Medium-quality	Genome-fragment	71.1	AAI-based
A01_idba_310	30445	No	NA	45	12	0	Medium-quality	Genome-fragment	72.92	AAI-based
A01_idba_313	30222	No	NA	35	9	1	Low-quality	Genome-fragment	42.42	AAI-based
A01_idba_315	30059	No	NA	30	0	21	Not-determined	Genome-fragment	NA	NA
A01_idba_317	29828	No	NA	41	1	3	Low-quality	Genome-fragment	20.8	AAI-based
A01_idba_318	29791	No	NA	32	2	0	Medium-quality	Genome-fragment	65.61	AAI-based
A01_idba_319	29780	No	NA	46	15	0	Medium-quality	Genome-fragment	88.34	AAI-based
A01_idba_320	29778	No	NA	23	0	18	Not-determined	Genome-fragment	NA	NA
A01_idba_324	29476	No	NA	40	4	2	Medium-quality	Genome-fragment	73.82	AAI-based
A01_idba_328	29062	No	NA	23	5	0	Low-quality	Genome-fragment	26.15	AAI-based
A01_idba_329	29012	No	NA	16	0	12	Not-determined	Genome-fragment	NA	NA
A01_idba_331	28929	No	NA	37	16	0	Low-quality	Genome-fragment	48.67	AAI-based
A01_idba_332	28868	No	NA	33	3	0	Medium-quality	Genome-fragment	73.27	AAI-based
A01_idba_333	28738	No	NA	35	16	0	Medium-quality	Genome-fragment	61.28	AAI-based
A01_idba_334	28699	No	NA	30	9	1	Medium-quality	Genome-fragment	54.06	AAI-based
A01_idba_337	28525	No	NA	47	10	1	Medium-quality	Genome-fragment	71.68	AAI-based
A01_idba_338	28364	No	NA	25	4	0	Low-quality	Genome-fragment	15.91	AAI-based
A01_idba_342	27918	No	NA	43	14	0	Medium-quality	Genome-fragment	62.74	AAI-based
A01_idba_344	27842	No	NA	53	10	0	Medium-quality	Genome-fragment	65.9	AAI-based
A01_idba_345	27757	No	NA	27	7	0	Low-quality	Genome-fragment	18.55	AAI-based
A01_idba_353	27156	No	NA	47	13	0	Medium-quality	Genome-fragment	75.36	AAI-based
A01_idba_355	27022	No	NA	31	14	1	Medium-quality	Genome-fragment	60.17	AAI-based
A01_idba_357	26889	No	NA	38	5	0	Low-quality	Genome-fragment	26.61	AAI-based
A01_idba_359	26834	No	NA	32	4	1	Low-quality	Genome-fragment	41.85	AAI-based
A01_idba_361	26775	No	NA	19	0	18	Not-determined	Genome-fragment	NA	NA
A01_idba_362	26726	No	NA	53	11	1	Low-quality	Genome-fragment	37.64	AAI-based
A01_idba_365	26483	No	NA	40	1	1	Low-quality	Genome-fragment	23.92	AAI-based
A01_idba_369	26239	No	NA	31	21	0	Medium-quality	Genome-fragment	74.85	AAI-based
A01_idba_370	26203	No	NA	44	16	0	Medium-quality	Genome-fragment	73.83	AAI-based
A01_idba_371	26197	No	NA	14	0	3	Low-quality	Genome-fragment	34.45	AAI-based
A01_idba_373	26069	No	NA	42	17	2	Medium-quality	Genome-fragment	75.69	AAI-based
A01_idba_380	25484	No	NA	28	3	0	Low-quality	Genome-fragment	17.77	AAI-based
A01_idba_383	25228	No	NA	41	16	0	Medium-quality	Genome-fragment	63.27	AAI-based
A01_idba_387	24943	No	NA	31	14	0	Medium-quality	Genome-fragment	64.02	AAI-based
A01_idba_391	24752	No	NA	26	19	0	Low-quality	Genome-fragment	40.69	AAI-based
A01_idba_392	24747	No	NA	51	13	1	Medium-quality	Genome-fragment	58.3	AAI-based
A01_idba_395	24592	No	NA	34	3	3	Medium-quality	Genome-fragment	61.81	AAI-based
A01_idba_400	24457	No	NA	37	11	2	Medium-quality	Genome-fragment	67.22	AAI-based
A01_idba_401	24436	No	NA	42	6	0	Medium-quality	Genome-fragment	58.61	AAI-based
A01_idba_402	24406	No	NA	39	13	1	Medium-quality	Genome-fragment	61.55	AAI-based
A01_idba_403	24343	No	NA	30	0	13	Not-determined	Genome-fragment	NA	NA
A01_idba_409	23949	No	NA	28	17	0	Medium-quality	Genome-fragment	62.5	AAI-based
A01_idba_416	23612	No	NA	19	0	17	Not-determined	Genome-fragment	NA	NA
A01_idba_417	23612	Yes	16385	35	9	7	Low-quality	Genome-fragment	39.76	AAI-based
A01_idba_422	23309	No	NA	24	13	0	Low-quality	Genome-fragment	46.25	AAI-based
A01_idba_424	23124	No	NA	30	11	0	Low-quality	Genome-fragment	48.72	AAI-based
A01_idba_427	22975	No	NA	18	0	17	Not-determined	Genome-fragment	NA	NA
A01_idba_431	22887	No	NA	18	0	15	Not-determined	Genome-fragment	NA	NA
A01_idba_440	22035	No	NA	20	2	8	Low-quality	Genome-fragment	37.85	HMM-based
A01_idba_441	22010	No	NA	14	0	10	Not-determined	Genome-fragment	NA	NA
A01_idba_443	22007	No	NA	30	21	0	Low-quality	Genome-fragment	35.42	AAI-based
A01_idba_446	21917	No	NA	41	5	1	Medium-quality	Genome-fragment	57.02	AAI-based
A01_idba_447	21896	No	NA	19	0	17	Not-determined	Genome-fragment	NA	NA
A01_idba_451	21629	No	NA	22	0	5	Low-quality	Genome-fragment	48.14	AAI-based
A01_idba_452	21602	No	NA	21	10	0	Low-quality	Genome-fragment	34.33	AAI-based
A01_idba_454	21568	No	NA	38	9	1	Medium-quality	Genome-fragment	51.48	AAI-based
A01_idba_456	21355	No	NA	35	9	1	Low-quality	Genome-fragment	34.85	AAI-based
A01_idba_457	21252	No	NA	34	8	0	Low-quality	Genome-fragment	47.15	AAI-based
A01_idba_460	20950	No	NA	53	2	0	Low-quality	Genome-fragment	12.21	AAI-based
A01_idba_464	20860	Yes	7966	24	2	8	Low-quality	Genome-fragment	16.79	HMM-based
A01_idba_465	20759	No	NA	23	0	12	Not-determined	Genome-fragment	NA	NA
A01_idba_466	20734	No	NA	23	13	0	Medium-quality	Genome-fragment	61.77	AAI-based
A01_idba_472	20401	No	NA	20	4	0	Low-quality	Genome-fragment	47.68	AAI-based
A01_idba_477	20254	No	NA	37	3	3	Low-quality	Genome-fragment	10.79	AAI-based
A01_idba_478	20244	No	NA	15	0	12	Not-determined	Genome-fragment	NA	NA
A01_idba_480	20111	No	NA	23	0	6	Low-quality	Genome-fragment	39.27	AAI-based
A01_idba_481	20070	No	NA	15	0	3	Not-determined	Genome-fragment	NA	NA
A01_idba_482	20062	No	NA	20	0	14	Low-quality	Genome-fragment	11.23	AAI-based
A01_idba_483	20050	No	NA	19	0	15	Not-determined	Genome-fragment	NA	NA
A01_idba_484	19960	Yes	7076	16	2	4	Low-quality	Genome-fragment	13.33	AAI-based
A01_idba_486	19918	No	NA	16	0	8	Not-determined	Genome-fragment	NA	NA
A01_idba_492	19664	No	NA	33	8	0	Low-quality	Genome-fragment	48.75	AAI-based
A01_idba_494	19589	No	NA	23	0	7	Not-determined	Genome-fragment	NA	NA
A01_idba_495	19544	No	NA	29	8	2	Low-quality	Genome-fragment	37.39	AAI-based
A01_idba_506	19106	No	NA	20	1	4	Low-quality	Genome-fragment	16.86	HMM-based
A01_idba_513	18911	No	NA	16	0	12	Not-determined	Genome-fragment	NA	NA
A01_idba_514	18891	No	NA	10	0	7	Not-determined	Genome-fragment	NA	NA
A01_idba_517	18719	No	NA	12	1	6	Low-quality	Genome-fragment	12.11	HMM-based
A01_idba_518	18614	No	NA	25	10	0	Medium-quality	Genome-fragment	50.59	AAI-based
A01_idba_523	18460	No	NA	8	0	6	Not-determined	Genome-fragment	NA	NA
A01_idba_524	18454	No	NA	28	10	1	Low-quality	Genome-fragment	41.85	AAI-based
A01_idba_526	18376	No	NA	38	7	0	Medium-quality	Genome-fragment	53.15	AAI-based
A01_idba_530	18187	No	NA	16	0	15	Not-determined	Genome-fragment	NA	NA
A01_idba_531	18180	No	NA	25	1	2	Low-quality	Genome-fragment	6.56	HMM-based
A01_idba_532	18135	No	NA	22	9	0	Medium-quality	Genome-fragment	85.34	AAI-based
A01_idba_535	18064	No	NA	32	0	31	Not-determined	Genome-fragment	NA	NA
A01_idba_536	18026	No	NA	19	13	0	Low-quality	Genome-fragment	29.96	AAI-based
A01_idba_541	17920	No	NA	30	4	0	Low-quality	Genome-fragment	30.71	AAI-based
A01_idba_542	17916	No	NA	17	0	3	Not-determined	Genome-fragment	NA	NA
A01_idba_545	17830	No	NA	14	0	12	Not-determined	Genome-fragment	NA	NA
A01_idba_546	17796	No	NA	16	0	13	Not-determined	Genome-fragment	NA	NA
A01_idba_548	17741	No	NA	21	17	0	Low-quality	Genome-fragment	42.81	AAI-based
A01_idba_549	17737	No	NA	29	6	2	Low-quality	Genome-fragment	9.48	AAI-based
A01_idba_553	17670	No	NA	21	0	1	Low-quality	Genome-fragment	30.43	AAI-based
A01_idba_556	17497	No	NA	14	0	11	Not-determined	Genome-fragment	NA	NA
A01_idba_558	17426	No	NA	32	7	0	Low-quality	Genome-fragment	41.88	AAI-based
A01_idba_562	17406	No	NA	24	6	0	Medium-quality	Genome-fragment	75.67	AAI-based
A01_idba_563	17378	No	NA	10	0	8	Low-quality	Genome-fragment	10.41	AAI-based
A01_idba_564	17362	No	NA	12	0	8	Not-determined	Genome-fragment	NA	NA
A01_idba_565	17320	No	NA	17	5	1	Low-quality	Genome-fragment	38.53	AAI-based
A01_idba_567	17292	No	NA	29	4	0	Low-quality	Genome-fragment	38.44	AAI-based
A01_idba_568	17288	No	NA	33	9	0	Low-quality	Genome-fragment	38.85	AAI-based
A01_idba_572	17216	No	NA	23	13	0	Low-quality	Genome-fragment	45.79	AAI-based
A01_idba_577	17116	No	NA	25	4	1	Low-quality	Genome-fragment	44.62	AAI-based
A01_idba_578	17110	No	NA	3	0	2	Not-determined	Genome-fragment	NA	NA
A01_idba_581	17050	No	NA	16	0	10	Not-determined	Genome-fragment	NA	NA
A01_idba_582	17000	No	NA	32	5	0	Low-quality	Genome-fragment	35.11	AAI-based
A01_idba_583	16923	No	NA	31	10	1	Low-quality	Genome-fragment	39.17	AAI-based
A01_idba_585	16873	No	NA	32	7	0	Low-quality	Genome-fragment	43.01	AAI-based
A01_idba_588	16830	No	NA	20	17	0	Low-quality	Genome-fragment	44.84	AAI-based
A01_idba_589	16810	No	NA	10	0	6	Not-determined	Genome-fragment	NA	NA
A01_idba_592	16794	No	NA	35	2	3	Low-quality	Genome-fragment	44	AAI-based
A01_idba_594	16774	No	NA	17	3	0	Low-quality	Genome-fragment	36.86	AAI-based
A01_idba_595	16760	No	NA	10	0	9	Not-determined	Genome-fragment	NA	NA
A01_idba_597	16727	No	NA	27	10	0	Low-quality	Genome-fragment	40.48	AAI-based
A01_idba_599	16671	No	NA	18	13	0	Low-quality	Genome-fragment	41.84	AAI-based
A01_idba_602	16634	No	NA	30	8	0	Low-quality	Genome-fragment	37.4	AAI-based
A01_idba_604	16590	No	NA	12	0	8	Not-determined	Genome-fragment	NA	NA
A01_idba_609	16318	No	NA	23	9	0	Medium-quality	Genome-fragment	73.3	AAI-based
A01_idba_613	16239	No	NA	20	2	1	Low-quality	Genome-fragment	9.17	AAI-based
A01_idba_615	16093	No	NA	16	0	8	Not-determined	Genome-fragment	NA	NA
A01_idba_616	16032	No	NA	18	13	0	Low-quality	Genome-fragment	49.36	AAI-based
A01_idba_618	16015	No	NA	13	1	10	Low-quality	Genome-fragment	7.32	AAI-based
A01_idba_620	15966	No	NA	35	3	0	Low-quality	Genome-fragment	43.25	AAI-based
A01_idba_622	15918	No	NA	8	0	2	Low-quality	Genome-fragment	22.39	AAI-based
A01_idba_625	15901	No	NA	26	7	1	High-quality	High-quality	95.79	AAI-based
A01_idba_628	15848	No	NA	24	2	0	Low-quality	Genome-fragment	26.47	AAI-based
A01_idba_629	15829	No	NA	13	0	10	Not-determined	Genome-fragment	NA	NA
A01_idba_634	15730	No	NA	29	7	0	Low-quality	Genome-fragment	33.54	AAI-based
A01_idba_638	15573	No	NA	16	12	0	Low-quality	Genome-fragment	40.56	AAI-based
A01_idba_640	15549	No	NA	21	7	0	Medium-quality	Genome-fragment	72.26	AAI-based
A01_idba_641	15530	No	NA	12	0	9	Not-determined	Genome-fragment	NA	NA
A01_idba_643	15516	No	NA	15	1	6	Low-quality	Genome-fragment	8.84	AAI-based
A01_idba_651	15376	No	NA	19	1	1	Low-quality	Genome-fragment	10.72	AAI-based
A01_idba_657	15264	No	NA	16	6	0	Medium-quality	Genome-fragment	78.06	AAI-based
A01_idba_663	15128	No	NA	11	0	10	Not-determined	Genome-fragment	NA	NA
A01_idba_665	15117	No	NA	22	12	0	Low-quality	Genome-fragment	42.36	AAI-based
A01_idba_669	15056	No	NA	21	7	0	Medium-quality	Genome-fragment	75.46	AAI-based
A01_idba_672	14971	No	NA	26	0	7	Not-determined	Genome-fragment	NA	NA
A01_idba_679	14799	No	NA	8	0	5	Not-determined	Genome-fragment	NA	NA
A01_idba_682	14750	No	NA	15	0	14	Low-quality	Genome-fragment	4.69	AAI-based
A01_idba_685	14615	No	NA	13	0	1	Not-determined	Genome-fragment	NA	NA
A01_idba_697	14465	No	NA	10	1	0	Low-quality	Genome-fragment	8.05	AAI-based
A01_idba_698	14449	No	NA	20	11	0	Low-quality	Genome-fragment	36.24	AAI-based
A01_idba_699	14432	No	NA	7	1	0	Low-quality	Genome-fragment	21.67	AAI-based
A01_idba_702	14406	No	NA	14	0	9	Not-determined	Genome-fragment	NA	NA
A01_idba_708	14246	No	NA	14	4	0	Low-quality	Genome-fragment	20.24	AAI-based
A01_idba_711	14187	No	NA	20	8	0	Medium-quality	Genome-fragment	65.79	AAI-based
A01_idba_713	14172	No	NA	10	0	9	Not-determined	Genome-fragment	NA	NA
A01_idba_715	14145	No	NA	21	4	0	Low-quality	Genome-fragment	33.65	AAI-based
A01_idba_716	14142	No	NA	34	6	1	Low-quality	Genome-fragment	24.75	AAI-based
A01_idba_717	14109	No	NA	13	0	2	Not-determined	Genome-fragment	NA	NA
A01_idba_728	13875	No	NA	28	3	0	Low-quality	Genome-fragment	34.99	AAI-based
A01_idba_735	13776	No	NA	7	0	1	Low-quality	Genome-fragment	13.84	AAI-based
A01_idba_737	13759	No	NA	14	0	11	Not-determined	Genome-fragment	NA	NA
A01_idba_740	13727	No	NA	15	0	14	Not-determined	Genome-fragment	NA	NA
A01_idba_746	13590	No	NA	18	14	0	Low-quality	Genome-fragment	32.09	AAI-based
A01_idba_747	13582	No	NA	14	1	1	Low-quality	Genome-fragment	7.37	HMM-based
A01_idba_759	13271	No	NA	1	0	1	Not-determined	Genome-fragment	NA	NA
A01_idba_761	13234	Yes	9367	10	4	1	Low-quality	Genome-fragment	18.1	AAI-based
A01_idba_763	13221	No	NA	14	0	0	Low-quality	Genome-fragment	7.21	AAI-based
A01_idba_765	13172	No	NA	25	3	1	Low-quality	Genome-fragment	40.8	AAI-based
A01_idba_770	13111	No	NA	35	2	0	Low-quality	Genome-fragment	29.21	AAI-based
A01_idba_778	12932	No	NA	10	0	8	Not-determined	Genome-fragment	NA	NA
A01_idba_782	12874	No	NA	14	0	2	Low-quality	Genome-fragment	21.5	AAI-based
A01_idba_785	12840	No	NA	9	0	7	Not-determined	Genome-fragment	NA	NA
A01_idba_787	12832	Yes	5965	10	1	2	Low-quality	Genome-fragment	7.1	HMM-based
A01_idba_793	12800	No	NA	28	2	0	Low-quality	Genome-fragment	11.24	AAI-based
A01_idba_797	12794	No	NA	8	0	8	Not-determined	Genome-fragment	NA	NA
A01_idba_798	12774	No	NA	13	0	13	Not-determined	Genome-fragment	NA	NA
A01_idba_802	12721	No	NA	22	11	1	Low-quality	Genome-fragment	27.16	AAI-based
A01_idba_803	12696	No	NA	11	0	8	Not-determined	Genome-fragment	NA	NA
A01_idba_805	12643	No	NA	24	3	0	Low-quality	Genome-fragment	19.96	AAI-based
A01_idba_806	12641	No	NA	16	3	0	Low-quality	Genome-fragment	22.1	AAI-based
A01_idba_810	12564	No	NA	14	0	8	Not-determined	Genome-fragment	NA	NA
A01_idba_813	12522	No	NA	10	0	7	Not-determined	Genome-fragment	NA	NA
A01_idba_814	12504	No	NA	7	0	1	Not-determined	Genome-fragment	NA	NA
A01_idba_815	12496	No	NA	13	8	0	Low-quality	Genome-fragment	26.88	AAI-based
A01_idba_819	12389	No	NA	15	7	0	Low-quality	Genome-fragment	25.29	AAI-based
A01_idba_822	12353	No	NA	12	0	9	Not-determined	Genome-fragment	NA	NA
A01_idba_823	12348	No	NA	13	2	0	Low-quality	Genome-fragment	25.55	HMM-based
A01_idba_827	12288	No	NA	11	0	10	Not-determined	Genome-fragment	NA	NA
A01_idba_831	12281	No	NA	8	0	5	Low-quality	Genome-fragment	8.83	AAI-based
A01_idba_832	12257	No	NA	4	0	0	Not-determined	Genome-fragment	NA	NA
A01_idba_841	12127	No	NA	17	8	0	Low-quality	Genome-fragment	28.36	AAI-based
A01_idba_844	12076	No	NA	16	3	0	Low-quality	Genome-fragment	32.71	AAI-based
A01_idba_847	12044	No	NA	7	0	6	Low-quality	Genome-fragment	3.2	AAI-based
A01_idba_851	11992	No	NA	14	0	11	Not-determined	Genome-fragment	NA	NA
A01_idba_853	11936	No	NA	9	0	5	Not-determined	Genome-fragment	NA	NA
A01_idba_854	11908	No	NA	23	0	1	Low-quality	Genome-fragment	8.3	AAI-based
A01_idba_860	11785	No	NA	15	8	0	Low-quality	Genome-fragment	32.93	AAI-based
A01_idba_874	11551	No	NA	19	3	0	Low-quality	Genome-fragment	28.2	AAI-based
A01_idba_876	11537	No	NA	9	0	7	Not-determined	Genome-fragment	NA	NA
A01_idba_877	11532	Yes	4310	7	1	1	Low-quality	Genome-fragment	7.73	AAI-based
A01_idba_881	11511	No	NA	13	0	8	Not-determined	Genome-fragment	NA	NA
A01_idba_882	11508	No	NA	13	12	0	Low-quality	Genome-fragment	29.06	AAI-based
A01_idba_885	11487	No	NA	16	6	0	Low-quality	Genome-fragment	25.59	AAI-based
A01_idba_889	11476	No	NA	13	5	0	Low-quality	Genome-fragment	27.22	AAI-based
A01_idba_891	11465	No	NA	19	3	0	Complete	High-quality	100	DTR
A01_idba_893	11439	No	NA	18	12	0	Low-quality	Genome-fragment	30.43	AAI-based
A01_idba_898	11381	No	NA	13	0	3	Not-determined	Genome-fragment	NA	NA
A01_idba_902	11325	No	NA	24	1	0	Low-quality	Genome-fragment	13.02	AAI-based
A01_idba_907	11255	No	NA	11	0	9	Not-determined	Genome-fragment	NA	NA
A01_idba_909	11238	No	NA	11	0	8	Not-determined	Genome-fragment	NA	NA
A01_idba_911	11223	No	NA	21	3	1	Low-quality	Genome-fragment	21.2	AAI-based
A01_idba_914	11200	No	NA	9	0	3	Not-determined	Genome-fragment	NA	NA
A01_idba_917	11137	No	NA	7	0	3	Not-determined	Genome-fragment	NA	NA
A01_idba_919	11130	No	NA	9	1	0	Low-quality	Genome-fragment	11.43	AAI-based
A01_idba_923	11104	No	NA	14	0	13	Not-determined	Genome-fragment	NA	NA
A01_idba_926	11061	No	NA	4	0	4	Not-determined	Genome-fragment	NA	NA
A01_idba_932	10979	No	NA	10	0	6	Not-determined	Genome-fragment	NA	NA
A01_idba_935	10936	No	NA	14	0	5	Not-determined	Genome-fragment	NA	NA
A01_idba_937	10912	No	NA	18	2	0	Low-quality	Genome-fragment	6.13	AAI-based
A01_idba_942	10841	No	NA	13	0	3	Not-determined	Genome-fragment	NA	NA
A01_idba_949	10802	No	NA	8	0	4	Not-determined	Genome-fragment	NA	NA
A01_idba_951	10797	No	NA	18	3	0	Low-quality	Genome-fragment	20.26	HMM-based
A01_idba_953	10790	No	NA	7	0	4	Not-determined	Genome-fragment	NA	NA
A01_idba_955	10771	No	NA	7	0	6	Not-determined	Genome-fragment	NA	NA
A01_idba_960	10693	No	NA	15	9	0	Low-quality	Genome-fragment	22.73	AAI-based
A01_idba_961	10692	No	NA	8	0	2	Low-quality	Genome-fragment	10.71	AAI-based
A01_idba_967	10620	No	NA	12	0	1	Not-determined	Genome-fragment	NA	NA
A01_idba_971	10598	No	NA	17	0	10	Not-determined	Genome-fragment	NA	NA
A01_idba_975	10564	No	NA	12	0	3	Not-determined	Genome-fragment	NA	NA
A01_idba_977	10544	No	NA	23	2	0	Low-quality	Genome-fragment	10.95	HMM-based
A01_idba_978	10539	No	NA	11	0	8	Not-determined	Genome-fragment	NA	NA
A01_idba_979	10537	No	NA	16	0	4	Not-determined	Genome-fragment	NA	NA
A01_idba_982	10522	Yes	8049	21	3	3	Low-quality	Genome-fragment	21.65	AAI-based
A01_idba_995	10374	No	NA	14	0	3	Not-determined	Genome-fragment	NA	NA
A01_idba_996	10361	No	NA	9	0	8	Not-determined	Genome-fragment	NA	NA
A01_idba_998	10354	No	NA	3	0	1	Not-determined	Genome-fragment	NA	NA
A01_idba_1004	10300	No	NA	7	0	0	Low-quality	Genome-fragment	10.6	AAI-based
A01_idba_1005	10289	No	NA	7	0	0	Not-determined	Genome-fragment	NA	NA
A01_idba_1008	10254	No	NA	15	10	0	Low-quality	Genome-fragment	17.11	AAI-based
A01_idba_1011	10235	No	NA	15	0	1	Medium-quality	Genome-fragment	69.2	AAI-based
A01_idba_1015	10211	No	NA	12	0	8	Not-determined	Genome-fragment	NA	NA
A01_idba_1021	10154	No	NA	20	3	0	Low-quality	Genome-fragment	11.38	AAI-based
A01_idba_1028	10032	Yes	1904	3	1	2	Low-quality	Genome-fragment	0.6	AAI-based
A01_idba_1029	10023	No	NA	10	0	3	Not-determined	Genome-fragment	NA	NA
A01_idba_1031	9988	No	NA	10	0	8	Not-determined	Genome-fragment	NA	NA
A01_idba_1035	9943	No	NA	11	0	9	Not-determined	Genome-fragment	NA	NA
A01_idba_1037	9933	No	NA	15	8	0	Low-quality	Genome-fragment	19.26	AAI-based
A01_idba_1039	9914	No	NA	15	3	0	Low-quality	Genome-fragment	5.31	AAI-based
A01_idba_1041	9906	No	NA	17	1	0	Low-quality	Genome-fragment	27.68	AAI-based
A01_idba_1042	9901	No	NA	11	3	1	Low-quality	Genome-fragment	11.86	HMM-based
A01_idba_1043	9882	No	NA	18	6	1	Low-quality	Genome-fragment	6.69	AAI-based
A01_idba_1047	9866	No	NA	16	9	0	Low-quality	Genome-fragment	26.21	AAI-based
A01_idba_1049	9855	No	NA	15	0	1	Not-determined	Genome-fragment	NA	NA
A01_idba_1050	9844	No	NA	15	8	0	Low-quality	Genome-fragment	24.67	AAI-based
A01_idba_1052	9832	No	NA	10	0	9	Not-determined	Genome-fragment	NA	NA
A01_idba_1053	9829	No	NA	18	6	0	Medium-quality	Genome-fragment	65.96	AAI-based
A01_idba_1056	9820	No	NA	10	0	9	Not-determined	Genome-fragment	NA	NA
A01_idba_1061	9804	No	NA	1	0	0	Not-determined	Genome-fragment	NA	NA
A01_idba_1062	9798	No	NA	15	3	0	Low-quality	Genome-fragment	5.24	AAI-based
A01_idba_1065	9788	No	NA	7	0	5	Not-determined	Genome-fragment	NA	NA
A01_idba_1075	9736	No	NA	25	6	0	Low-quality	Genome-fragment	17.07	AAI-based
A01_idba_1080	9697	No	NA	9	0	5	Not-determined	Genome-fragment	NA	NA
A01_idba_1081	9677	No	NA	6	0	6	Low-quality	Genome-fragment	4.86	AAI-based
A01_idba_1082	9671	No	NA	12	8	0	Low-quality	Genome-fragment	25.63	AAI-based
A01_idba_1084	9668	No	NA	9	0	5	Low-quality	Genome-fragment	8.94	AAI-based
A01_idba_1086	9634	No	NA	13	2	0	Low-quality	Genome-fragment	9.51	AAI-based
A01_idba_1093	9580	No	NA	20	4	0	Low-quality	Genome-fragment	20.61	AAI-based
A01_idba_1099	9519	No	NA	15	6	0	Low-quality	Genome-fragment	14.81	AAI-based
A01_idba_1105	9452	No	NA	6	0	3	Not-determined	Genome-fragment	NA	NA
A01_idba_1107	9417	No	NA	11	0	5	Not-determined	Genome-fragment	NA	NA
A01_idba_1108	9414	No	NA	12	0	8	Not-determined	Genome-fragment	NA	NA
A01_idba_1110	9398	No	NA	14	3	1	Low-quality	Genome-fragment	5.02	AAI-based
A01_idba_1113	9337	No	NA	18	3	0	Low-quality	Genome-fragment	5	AAI-based
A01_idba_1114	9335	No	NA	8	0	4	Not-determined	Genome-fragment	NA	NA
A01_idba_1120	9306	No	NA	11	5	0	Low-quality	Genome-fragment	40.28	AAI-based
A01_idba_1123	9297	No	NA	12	0	5	Not-determined	Genome-fragment	NA	NA
A01_idba_1136	9212	No	NA	10	0	6	Not-determined	Genome-fragment	NA	NA
A01_idba_1138	9195	No	NA	15	1	0	Low-quality	Genome-fragment	17.65	AAI-based
A01_idba_1142	9165	No	NA	7	0	6	Not-determined	Genome-fragment	NA	NA
A01_idba_1143	9161	No	NA	4	0	0	Not-determined	Genome-fragment	NA	NA
A01_idba_1144	9145	No	NA	14	8	0	Low-quality	Genome-fragment	22.83	AAI-based
A01_idba_1146	9120	No	NA	10	0	1	Not-determined	Genome-fragment	NA	NA
A01_idba_1149	9080	No	NA	4	0	3	Not-determined	Genome-fragment	NA	NA
A01_idba_1151	9072	No	NA	12	0	3	Not-determined	Genome-fragment	NA	NA
A01_idba_1152	9068	No	NA	6	0	5	Not-determined	Genome-fragment	NA	NA
A01_idba_1160	9037	No	NA	14	2	0	Low-quality	Genome-fragment	26.73	HMM-based
A01_idba_1164	9003	No	NA	12	1	1	Low-quality	Genome-fragment	12.64	AAI-based
A01_idba_1173	8923	No	NA	13	1	0	Low-quality	Genome-fragment	17.43	AAI-based
A01_idba_1177	8911	No	NA	26	8	0	Low-quality	Genome-fragment	21.59	AAI-based
A01_idba_1184	8869	No	NA	17	3	0	Low-quality	Genome-fragment	11.21	AAI-based
A01_idba_1185	8854	No	NA	9	0	4	Not-determined	Genome-fragment	NA	NA
A01_idba_1186	8845	No	NA	2	0	2	Not-determined	Genome-fragment	NA	NA
A01_idba_1187	8842	No	NA	8	0	4	Low-quality	Genome-fragment	2.69	AAI-based
A01_idba_1193	8782	No	NA	9	0	4	Not-determined	Genome-fragment	NA	NA
A01_idba_1194	8781	No	NA	7	0	5	Not-determined	Genome-fragment	NA	NA
A01_idba_1200	8753	No	NA	6	0	3	Not-determined	Genome-fragment	NA	NA
A01_idba_1202	8725	No	NA	9	0	1	Not-determined	Genome-fragment	NA	NA
A01_idba_1203	8718	No	NA	10	3	0	Low-quality	Genome-fragment	29.16	HMM-based
A01_idba_1204	8717	No	NA	4	0	0	Low-quality	Genome-fragment	22.9	AAI-based
A01_idba_1208	8687	No	NA	9	0	9	Not-determined	Genome-fragment	NA	NA
A01_idba_1220	8610	No	NA	6	0	6	Not-determined	Genome-fragment	NA	NA
A01_idba_1221	8593	No	NA	8	0	1	Not-determined	Genome-fragment	NA	NA
A01_idba_1226	8572	No	NA	4	0	1	Not-determined	Genome-fragment	NA	NA
A01_idba_1228	8563	No	NA	9	0	8	Low-quality	Genome-fragment	1.27	AAI-based
A01_idba_1230	8553	No	NA	8	0	5	Not-determined	Genome-fragment	NA	NA
A01_idba_1236	8530	No	NA	9	0	8	Not-determined	Genome-fragment	NA	NA
A01_idba_1237	8529	No	NA	13	1	1	Low-quality	Genome-fragment	16.99	AAI-based
A01_idba_1238	8529	No	NA	5	0	0	Low-quality	Genome-fragment	21.9	AAI-based
A01_idba_1239	8526	No	NA	10	0	4	Not-determined	Genome-fragment	NA	NA
A01_idba_1240	8516	No	NA	7	0	4	Not-determined	Genome-fragment	NA	NA
A01_idba_1242	8510	No	NA	8	0	6	Not-determined	Genome-fragment	NA	NA
A01_idba_1246	8483	No	NA	18	4	0	Low-quality	Genome-fragment	14.79	AAI-based
A01_idba_1247	8476	No	NA	10	0	1	Low-quality	Genome-fragment	7.73	AAI-based
A01_idba_1251	8460	No	NA	21	0	0	Low-quality	Genome-fragment	22.81	AAI-based
A01_idba_1255	8440	No	NA	11	0	3	Not-determined	Genome-fragment	NA	NA
A01_idba_1259	8424	No	NA	5	0	3	Not-determined	Genome-fragment	NA	NA
A01_idba_1265	8385	No	NA	10	0	6	Not-determined	Genome-fragment	NA	NA
A01_idba_1267	8372	No	NA	9	0	4	Not-determined	Genome-fragment	NA	NA
A01_idba_1272	8315	No	NA	12	3	0	Low-quality	Genome-fragment	14.55	AAI-based
A01_idba_1276	8280	No	NA	10	0	0	Not-determined	Genome-fragment	NA	NA
A01_idba_1277	8273	No	NA	11	0	3	Not-determined	Genome-fragment	NA	NA
A01_idba_1278	8259	No	NA	3	0	0	Low-quality	Genome-fragment	7.74	AAI-based
A01_idba_1279	8257	No	NA	4	0	2	Low-quality	Genome-fragment	3.99	AAI-based
A01_idba_1283	8221	No	NA	16	2	0	Low-quality	Genome-fragment	18.13	AAI-based
A01_idba_1288	8215	No	NA	14	4	0	Low-quality	Genome-fragment	10.43	AAI-based
A01_idba_1296	8188	No	NA	15	4	0	Low-quality	Genome-fragment	13.91	AAI-based
A01_idba_1298	8180	No	NA	7	0	2	Not-determined	Genome-fragment	NA	NA
A01_idba_1299	8173	No	NA	9	0	5	Not-determined	Genome-fragment	NA	NA
A01_idba_1302	8166	No	NA	7	0	4	Not-determined	Genome-fragment	NA	NA
A01_idba_1309	8142	No	NA	8	0	5	Not-determined	Genome-fragment	NA	NA
A01_idba_1310	8139	No	NA	9	0	7	Not-determined	Genome-fragment	NA	NA
A01_idba_1312	8132	No	NA	12	1	0	Low-quality	Genome-fragment	7.64	AAI-based
A01_idba_1313	8131	No	NA	6	1	0	Low-quality	Genome-fragment	4.33	AAI-based
A01_idba_1316	8107	No	NA	7	0	3	Not-determined	Genome-fragment	NA	NA
A01_idba_1318	8107	No	NA	9	3	0	Low-quality	Genome-fragment	26.26	HMM-based
A01_idba_1321	8093	No	NA	16	0	0	Low-quality	Genome-fragment	24.72	AAI-based
A01_idba_1322	8090	No	NA	7	0	7	Not-determined	Genome-fragment	NA	NA
A01_idba_1327	8049	No	NA	10	2	0	Low-quality	Genome-fragment	4.75	AAI-based
A01_idba_1329	8047	No	NA	7	0	2	Not-determined	Genome-fragment	NA	NA
A01_idba_1332	8023	No	NA	10	1	0	Low-quality	Genome-fragment	10.15	AAI-based
A01_idba_1333	8018	No	NA	17	4	0	Low-quality	Genome-fragment	17.25	AAI-based
A01_idba_1336	7980	No	NA	7	0	4	Not-determined	Genome-fragment	NA	NA
A01_idba_1340	7963	No	NA	14	1	0	Low-quality	Genome-fragment	20.49	AAI-based
A01_idba_1341	7958	No	NA	8	0	5	Not-determined	Genome-fragment	NA	NA
A01_idba_1342	7952	No	NA	8	0	6	Low-quality	Genome-fragment	3.89	AAI-based
A01_idba_1346	7940	No	NA	7	0	5	Low-quality	Genome-fragment	3.34	AAI-based
A01_idba_1351	7920	No	NA	4	1	0	Low-quality	Genome-fragment	11.57	HMM-based
A01_idba_1356	7894	No	NA	13	5	0	Low-quality	Genome-fragment	17.45	AAI-based
A01_idba_1357	7892	No	NA	14	0	0	Low-quality	Genome-fragment	4.17	AAI-based
A01_idba_1358	7886	No	NA	6	0	4	Not-determined	Genome-fragment	NA	NA
A01_idba_1360	7866	No	NA	8	0	8	Not-determined	Genome-fragment	NA	NA
A01_idba_1363	7841	No	NA	6	0	3	Not-determined	Genome-fragment	NA	NA
A01_idba_1368	7826	No	NA	16	0	1	Low-quality	Genome-fragment	15.42	AAI-based
A01_idba_1370	7816	No	NA	9	0	3	Not-determined	Genome-fragment	NA	NA
A01_idba_1371	7813	No	NA	15	5	1	Low-quality	Genome-fragment	12.92	AAI-based
A01_idba_1372	7809	No	NA	9	0	0	Low-quality	Genome-fragment	5.44	AAI-based
A01_idba_1387	7719	No	NA	5	0	3	Not-determined	Genome-fragment	NA	NA
A01_idba_1394	7687	No	NA	5	0	4	Not-determined	Genome-fragment	NA	NA
A01_idba_1399	7655	No	NA	12	0	1	Low-quality	Genome-fragment	5.34	AAI-based
A01_idba_1404	7632	No	NA	8	0	4	Low-quality	Genome-fragment	4.8	AAI-based
A01_idba_1405	7627	No	NA	9	0	3	Not-determined	Genome-fragment	NA	NA
A01_idba_1411	7596	No	NA	1	0	0	Low-quality	Genome-fragment	4.31	AAI-based
A01_idba_1414	7590	No	NA	16	2	0	Low-quality	Genome-fragment	17.59	AAI-based
A01_idba_1415	7581	Yes	5304	5	1	1	Low-quality	Genome-fragment	7.75	AAI-based
A01_idba_1418	7561	No	NA	5	0	3	Not-determined	Genome-fragment	NA	NA
A01_idba_1420	7558	No	NA	7	0	5	Low-quality	Genome-fragment	3.58	AAI-based
A01_idba_1422	7551	No	NA	9	0	5	Not-determined	Genome-fragment	NA	NA
A01_idba_1427	7528	No	NA	10	2	1	Low-quality	Genome-fragment	10.66	AAI-based
A01_idba_1428	7527	No	NA	5	0	0	Not-determined	Genome-fragment	NA	NA
A01_idba_1432	7508	No	NA	8	3	0	Low-quality	Genome-fragment	4.41	AAI-based
A01_idba_1433	7501	No	NA	7	0	6	Low-quality	Genome-fragment	16.13	AAI-based
A01_idba_1434	7501	No	NA	4	0	0	Not-determined	Genome-fragment	NA	NA
A01_idba_1437	7486	No	NA	10	5	0	Low-quality	Genome-fragment	29.58	AAI-based
A01_idba_1438	7480	No	NA	15	3	0	Low-quality	Genome-fragment	18.21	AAI-based
A01_idba_1442	7466	No	NA	14	2	0	Low-quality	Genome-fragment	12.87	HMM-based
A01_idba_1444	7443	No	NA	10	4	0	Low-quality	Genome-fragment	16.73	AAI-based
A01_idba_1446	7434	No	NA	11	8	0	Low-quality	Genome-fragment	19.57	AAI-based
A01_idba_1449	7421	No	NA	3	0	2	Not-determined	Genome-fragment	NA	NA
A01_idba_1451	7402	No	NA	8	0	1	Low-quality	Genome-fragment	32.63	AAI-based
A01_idba_1454	7387	No	NA	13	2	0	Low-quality	Genome-fragment	12.69	AAI-based
A01_idba_1463	7356	No	NA	14	4	0	Low-quality	Genome-fragment	11.86	HMM-based
A01_idba_1470	7338	No	NA	6	0	2	Not-determined	Genome-fragment	NA	NA
A01_idba_1471	7328	No	NA	15	1	1	Low-quality	Genome-fragment	5	HMM-based
A01_idba_1472	7326	No	NA	14	1	0	Low-quality	Genome-fragment	16.78	AAI-based
A01_idba_1487	7264	No	NA	13	1	0	Low-quality	Genome-fragment	20.62	AAI-based
A01_idba_1490	7240	No	NA	8	1	0	Low-quality	Genome-fragment	14.24	AAI-based
A01_idba_1491	7238	No	NA	9	0	1	Not-determined	Genome-fragment	NA	NA
A01_idba_1493	7227	No	NA	6	0	6	Not-determined	Genome-fragment	NA	NA
A01_idba_1495	7215	No	NA	9	0	6	Not-determined	Genome-fragment	NA	NA
A01_idba_1500	7205	No	NA	11	2	0	Low-quality	Genome-fragment	12.84	AAI-based
A01_idba_1502	7201	No	NA	11	3	0	Low-quality	Genome-fragment	3.92	AAI-based
A01_idba_1506	7167	No	NA	8	0	5	Not-determined	Genome-fragment	NA	NA
A01_idba_1507	7165	No	NA	9	8	0	Low-quality	Genome-fragment	17.63	AAI-based
A01_idba_1508	7154	No	NA	13	2	0	Low-quality	Genome-fragment	11.82	AAI-based
A01_idba_1510	7147	No	NA	7	0	2	Not-determined	Genome-fragment	NA	NA
A01_idba_1512	7143	No	NA	8	1	0	Low-quality	Genome-fragment	6.41	AAI-based
A01_idba_1513	7138	Yes	4574	6	1	1	Low-quality	Genome-fragment	6.84	HMM-based
A01_idba_1522	7085	Yes	3677	6	1	1	Low-quality	Genome-fragment	2.52	HMM-based
A01_idba_1524	7079	No	NA	12	4	0	Low-quality	Genome-fragment	18.86	AAI-based
A01_idba_1526	7074	No	NA	7	1	0	Low-quality	Genome-fragment	17.45	AAI-based
A01_idba_1527	7066	No	NA	2	0	1	Low-quality	Genome-fragment	12.67	AAI-based
A01_idba_1530	7050	No	NA	6	0	4	Not-determined	Genome-fragment	NA	NA
A01_idba_1541	6956	No	NA	16	2	0	Low-quality	Genome-fragment	18.72	AAI-based
A01_idba_1547	6947	No	NA	7	0	6	Not-determined	Genome-fragment	NA	NA
A01_idba_1548	6947	No	NA	13	0	4	Not-determined	Genome-fragment	NA	NA
A01_idba_1552	6933	No	NA	8	0	6	Not-determined	Genome-fragment	NA	NA
A01_idba_1553	6932	No	NA	7	0	5	Not-determined	Genome-fragment	NA	NA
A01_idba_1559	6916	No	NA	5	0	5	Not-determined	Genome-fragment	NA	NA
A01_idba_1561	6914	No	NA	9	4	0	Low-quality	Genome-fragment	13.4	AAI-based
A01_idba_1573	6878	No	NA	7	0	0	Low-quality	Genome-fragment	8.54	AAI-based
A01_idba_1574	6872	No	NA	9	5	0	Low-quality	Genome-fragment	14.06	AAI-based
A01_idba_1576	6867	No	NA	13	3	0	Low-quality	Genome-fragment	15.84	AAI-based
A01_idba_1578	6861	No	NA	9	0	3	Not-determined	Genome-fragment	NA	NA
A01_idba_1580	6858	No	NA	5	0	1	Not-determined	Genome-fragment	NA	NA
A01_idba_1581	6857	No	NA	2	0	1	Not-determined	Genome-fragment	NA	NA
A01_idba_1583	6850	No	NA	15	1	0	Low-quality	Genome-fragment	8.82	HMM-based
A01_idba_1585	6846	No	NA	7	3	0	Low-quality	Genome-fragment	6.54	AAI-based
A01_idba_1586	6845	No	NA	4	0	3	Not-determined	Genome-fragment	NA	NA
A01_idba_1587	6840	No	NA	11	0	0	Not-determined	Genome-fragment	NA	NA
A01_idba_1588	6839	No	NA	8	0	6	Not-determined	Genome-fragment	NA	NA
A01_idba_1590	6828	No	NA	5	0	4	Low-quality	Genome-fragment	2.83	AAI-based
A01_idba_1591	6826	No	NA	6	0	6	Not-determined	Genome-fragment	NA	NA
A01_idba_1592	6824	No	NA	5	0	0	Low-quality	Genome-fragment	4.21	AAI-based
A01_idba_1595	6823	No	NA	7	0	6	Not-determined	Genome-fragment	NA	NA
A01_idba_1605	6776	No	NA	5	0	4	Low-quality	Genome-fragment	6.07	AAI-based
A01_idba_1606	6775	No	NA	15	7	0	Low-quality	Genome-fragment	15.82	AAI-based
A01_idba_1610	6745	No	NA	5	0	3	Not-determined	Genome-fragment	NA	NA
A01_idba_1611	6743	No	NA	12	2	3	Low-quality	Genome-fragment	9.91	AAI-based
A01_idba_1612	6743	Yes	5643	8	4	1	Low-quality	Genome-fragment	11.98	AAI-based
A01_idba_1616	6735	No	NA	9	2	0	Low-quality	Genome-fragment	11.7	AAI-based
A01_idba_1617	6732	No	NA	5	0	3	Not-determined	Genome-fragment	NA	NA
A01_idba_1626	6690	No	NA	12	0	0	Not-determined	Genome-fragment	NA	NA
A01_idba_1631	6680	No	NA	6	1	0	Low-quality	Genome-fragment	7.5	HMM-based
A01_idba_1637	6648	No	NA	13	2	0	Low-quality	Genome-fragment	9.12	HMM-based
A01_idba_1646	6611	No	NA	4	2	1	Low-quality	Genome-fragment	9.67	AAI-based
A01_idba_1647	6608	No	NA	5	0	3	Low-quality	Genome-fragment	2.74	AAI-based
A01_idba_1650	6602	No	NA	5	0	4	Not-determined	Genome-fragment	NA	NA
A01_idba_1655	6582	No	NA	5	0	1	Not-determined	Genome-fragment	NA	NA
A01_idba_1658	6568	No	NA	13	0	3	Not-determined	Genome-fragment	NA	NA
A01_idba_1659	6564	No	NA	8	0	1	Low-quality	Genome-fragment	8.58	AAI-based
A01_idba_1662	6551	No	NA	11	1	1	Not-determined	Genome-fragment	NA	NA
A01_idba_1668	6535	No	NA	6	0	3	Not-determined	Genome-fragment	NA	NA
A01_idba_1675	6515	No	NA	3	1	0	Low-quality	Genome-fragment	3.68	AAI-based
A01_idba_1678	6514	No	NA	1	0	0	Low-quality	Genome-fragment	4.12	AAI-based
A01_idba_1679	6511	No	NA	13	5	0	Low-quality	Genome-fragment	11.75	AAI-based
A01_idba_1680	6494	No	NA	11	0	1	Not-determined	Genome-fragment	NA	NA
A01_idba_1684	6465	No	NA	4	0	1	Not-determined	Genome-fragment	NA	NA
A01_idba_1685	6463	No	NA	6	0	6	Not-determined	Genome-fragment	NA	NA
A01_idba_1686	6462	No	NA	13	4	0	Low-quality	Genome-fragment	16.21	AAI-based
A01_idba_1688	6453	No	NA	4	0	3	Not-determined	Genome-fragment	NA	NA
A01_idba_1692	6437	No	NA	8	0	6	Not-determined	Genome-fragment	NA	NA
A01_idba_1695	6418	No	NA	11	3	1	Low-quality	Genome-fragment	17.73	AAI-based
A01_idba_1696	6416	No	NA	12	0	6	Not-determined	Genome-fragment	NA	NA
A01_idba_1697	6413	No	NA	20	6	0	Low-quality	Genome-fragment	13.57	AAI-based
A01_idba_1708	6376	No	NA	15	2	0	Low-quality	Genome-fragment	13.5	AAI-based
A01_idba_1710	6367	No	NA	11	3	0	Low-quality	Genome-fragment	13.52	AAI-based
A01_idba_1712	6362	No	NA	12	0	0	Low-quality	Genome-fragment	14.4	AAI-based
A01_idba_1713	6361	No	NA	4	0	2	Not-determined	Genome-fragment	NA	NA
A01_idba_1727	6302	No	NA	10	0	1	Not-determined	Genome-fragment	NA	NA
A01_idba_1729	6295	No	NA	6	0	4	Not-determined	Genome-fragment	NA	NA
A01_idba_1732	6276	No	NA	12	0	1	Low-quality	Genome-fragment	15.48	AAI-based
A01_idba_1745	6227	No	NA	7	0	6	Not-determined	Genome-fragment	NA	NA
A01_idba_1747	6214	No	NA	6	0	5	Not-determined	Genome-fragment	NA	NA
A01_idba_1748	6212	No	NA	7	2	0	Low-quality	Genome-fragment	7.09	HMM-based
A01_idba_1749	6212	No	NA	7	0	3	Not-determined	Genome-fragment	NA	NA
A01_idba_1751	6208	No	NA	8	1	0	Low-quality	Genome-fragment	13.2	AAI-based
A01_idba_1755	6202	No	NA	9	0	7	Low-quality	Genome-fragment	4	AAI-based
A01_idba_1758	6196	No	NA	4	0	1	Not-determined	Genome-fragment	NA	NA
A01_idba_1761	6186	No	NA	5	0	4	Not-determined	Genome-fragment	NA	NA
A01_idba_1762	6181	No	NA	6	0	4	Not-determined	Genome-fragment	NA	NA
A01_idba_1763	6176	No	NA	5	2	0	Low-quality	Genome-fragment	16.08	AAI-based
A01_idba_1764	6173	No	NA	10	1	0	Low-quality	Genome-fragment	15.52	AAI-based
A01_idba_1765	6168	No	NA	10	1	0	Low-quality	Genome-fragment	8.04	AAI-based
A01_idba_1772	6134	No	NA	5	0	3	Not-determined	Genome-fragment	NA	NA
A01_idba_1774	6124	No	NA	5	0	4	Not-determined	Genome-fragment	NA	NA
A01_idba_1778	6115	No	NA	6	0	3	Not-determined	Genome-fragment	NA	NA
A01_idba_1781	6109	No	NA	11	1	0	Low-quality	Genome-fragment	14.08	AAI-based
A01_idba_1785	6086	No	NA	4	0	1	Not-determined	Genome-fragment	NA	NA
A01_idba_1789	6058	No	NA	8	0	0	Low-quality	Genome-fragment	10.7	AAI-based
A01_idba_1790	6057	No	NA	6	0	4	Not-determined	Genome-fragment	NA	NA
A01_idba_1791	6056	No	NA	6	0	5	Low-quality	Genome-fragment	9.95	AAI-based
A01_idba_1793	6046	No	NA	9	2	0	Low-quality	Genome-fragment	2.74	HMM-based
A01_idba_1794	6038	No	NA	8	0	0	Not-determined	Genome-fragment	NA	NA
A01_idba_1795	6029	No	NA	9	0	5	Not-determined	Genome-fragment	NA	NA
A01_idba_1796	6024	No	NA	12	2	0	Low-quality	Genome-fragment	9.57	AAI-based
A01_idba_1800	5989	No	NA	7	0	5	Not-determined	Genome-fragment	NA	NA
A01_idba_1801	5981	No	NA	6	6	0	Low-quality	Genome-fragment	18.54	AAI-based
A01_idba_1806	5975	No	NA	9	2	0	Low-quality	Genome-fragment	9.61	AAI-based
A01_idba_1808	5969	No	NA	5	0	4	Not-determined	Genome-fragment	NA	NA
A01_idba_1809	5967	No	NA	5	2	1	Low-quality	Genome-fragment	10.51	AAI-based
A01_idba_1810	5967	No	NA	10	0	2	Not-determined	Genome-fragment	NA	NA
A01_idba_1816	5949	No	NA	11	0	0	Low-quality	Genome-fragment	10.44	AAI-based
A01_idba_1817	5946	No	NA	9	0	2	Not-determined	Genome-fragment	NA	NA
A01_idba_1820	5934	No	NA	10	3	0	Low-quality	Genome-fragment	9.23	AAI-based
A01_idba_1826	5916	No	NA	3	0	0	Not-determined	Genome-fragment	NA	NA
A01_idba_1829	5902	No	NA	4	0	3	Not-determined	Genome-fragment	NA	NA
A01_idba_1831	5896	No	NA	7	4	0	Low-quality	Genome-fragment	15.28	AAI-based
A01_idba_1832	5895	No	NA	6	0	2	Low-quality	Genome-fragment	5.46	AAI-based
A01_idba_1836	5875	No	NA	11	2	1	Low-quality	Genome-fragment	13.72	AAI-based
A01_idba_1841	5856	No	NA	7	2	0	Low-quality	Genome-fragment	14.97	AAI-based
A01_idba_1842	5853	No	NA	4	0	1	Not-determined	Genome-fragment	NA	NA
A01_idba_1844	5835	No	NA	5	0	4	Not-determined	Genome-fragment	NA	NA
A01_idba_1846	5830	No	NA	15	2	0	Low-quality	Genome-fragment	15.33	AAI-based
A01_idba_1856	5783	No	NA	10	1	0	Low-quality	Genome-fragment	3.25	AAI-based
A01_idba_1857	5778	No	NA	2	0	2	Not-determined	Genome-fragment	NA	NA
A01_idba_1858	5774	No	NA	7	0	0	Low-quality	Genome-fragment	11.1	AAI-based
A01_idba_1862	5759	No	NA	4	0	4	Not-determined	Genome-fragment	NA	NA
A01_idba_1870	5738	No	NA	6	0	4	Not-determined	Genome-fragment	NA	NA
A01_idba_1880	5703	No	NA	6	0	0	Not-determined	Genome-fragment	NA	NA
A01_idba_1882	5700	No	NA	9	1	0	Low-quality	Genome-fragment	13.79	AAI-based
A01_idba_1883	5700	No	NA	11	1	0	Low-quality	Genome-fragment	7.31	AAI-based
A01_idba_1887	5691	No	NA	5	0	4	Not-determined	Genome-fragment	NA	NA
A01_idba_1890	5686	No	NA	2	0	2	Not-determined	Genome-fragment	NA	NA
A01_idba_1892	5685	No	NA	10	2	0	Low-quality	Genome-fragment	16.82	HMM-based
A01_idba_1895	5671	No	NA	13	1	0	Low-quality	Genome-fragment	12.41	AAI-based
A01_idba_1899	5661	No	NA	6	4	0	Low-quality	Genome-fragment	14.07	AAI-based
A01_idba_1900	5659	No	NA	4	0	1	Low-quality	Genome-fragment	4.29	AAI-based
A01_idba_1902	5644	No	NA	8	0	3	Not-determined	Genome-fragment	NA	NA
A01_idba_1903	5641	No	NA	4	0	3	Not-determined	Genome-fragment	NA	NA
A01_idba_1910	5603	No	NA	2	0	1	Not-determined	Genome-fragment	NA	NA
A01_idba_1911	5596	No	NA	4	2	0	Low-quality	Genome-fragment	7.39	HMM-based
A01_idba_1913	5587	No	NA	5	0	3	Not-determined	Genome-fragment	NA	NA
A01_idba_1914	5583	No	NA	12	0	0	Not-determined	Genome-fragment	NA	NA
A01_idba_1926	5549	Yes	2844	9	2	1	Low-quality	Genome-fragment	7.21	AAI-based
A01_idba_1931	5522	No	NA	8	1	0	Low-quality	Genome-fragment	4.9	HMM-based
A01_idba_1933	5516	No	NA	5	0	0	Low-quality	Genome-fragment	4.83	AAI-based
A01_idba_1936	5494	No	NA	5	0	5	Not-determined	Genome-fragment	NA	NA
A01_idba_1937	5494	No	NA	5	2	0	Low-quality	Genome-fragment	11.81	HMM-based
A01_idba_1938	5493	No	NA	6	0	6	Not-determined	Genome-fragment	NA	NA
A01_idba_1939	5492	No	NA	11	1	0	Low-quality	Genome-fragment	3.83	AAI-based
A01_idba_1941	5485	No	NA	8	0	0	Low-quality	Genome-fragment	6.94	AAI-based
A01_idba_1942	5482	No	NA	8	0	2	Low-quality	Genome-fragment	9.41	AAI-based
A01_idba_1944	5479	No	NA	8	2	0	Low-quality	Genome-fragment	9.34	AAI-based
A01_idba_1952	5452	No	NA	3	0	1	Not-determined	Genome-fragment	NA	NA
A01_idba_1955	5447	No	NA	4	0	1	Not-determined	Genome-fragment	NA	NA
A01_idba_1961	5435	No	NA	9	0	5	Not-determined	Genome-fragment	NA	NA
A01_idba_1962	5432	No	NA	10	1	0	Low-quality	Genome-fragment	8.1	AAI-based
A01_idba_1963	5432	No	NA	6	2	0	Low-quality	Genome-fragment	15.22	AAI-based
A01_idba_1967	5421	No	NA	6	0	0	Low-quality	Genome-fragment	12.1	AAI-based
A01_idba_1972	5401	No	NA	9	4	0	Low-quality	Genome-fragment	8.33	HMM-based
A01_idba_1976	5392	No	NA	11	0	1	Not-determined	Genome-fragment	NA	NA
A01_idba_1982	5374	No	NA	7	4	0	Low-quality	Genome-fragment	15.67	AAI-based
A01_idba_1987	5358	No	NA	8	4	0	Low-quality	Genome-fragment	14.99	AAI-based
A01_idba_1992	5345	No	NA	10	1	0	Low-quality	Genome-fragment	13.74	AAI-based
A01_idba_1995	5338	No	NA	8	1	0	Low-quality	Genome-fragment	12.56	AAI-based
A01_idba_1998	5330	No	NA	3	0	3	Not-determined	Genome-fragment	NA	NA
A01_idba_1999	5330	No	NA	7	0	0	Low-quality	Genome-fragment	8.72	AAI-based
A01_idba_2001	5327	No	NA	7	0	5	Not-determined	Genome-fragment	NA	NA
A01_idba_2003	5322	No	NA	8	0	2	Not-determined	Genome-fragment	NA	NA
A01_idba_2006	5305	No	NA	10	1	0	Low-quality	Genome-fragment	3.25	HMM-based
A01_idba_2008	5303	No	NA	4	0	2	Not-determined	Genome-fragment	NA	NA
A01_idba_2010	5296	No	NA	7	3	0	Low-quality	Genome-fragment	8.85	AAI-based
A01_idba_2016	5275	No	NA	10	0	0	Not-determined	Genome-fragment	NA	NA
A01_idba_2018	5271	No	NA	11	1	1	Low-quality	Genome-fragment	2.6	HMM-based
A01_idba_2023	5252	No	NA	5	0	2	Not-determined	Genome-fragment	NA	NA
A01_idba_2024	5250	No	NA	5	0	0	Low-quality	Genome-fragment	3.1	AAI-based
A01_idba_2025	5248	No	NA	4	0	1	Low-quality	Genome-fragment	10.1	AAI-based
A01_idba_2033	5229	No	NA	5	0	2	Not-determined	Genome-fragment	NA	NA
A01_idba_2036	5218	No	NA	7	0	1	Not-determined	Genome-fragment	NA	NA
A01_idba_2039	5215	No	NA	6	0	6	Not-determined	Genome-fragment	NA	NA
A01_idba_2043	5199	No	NA	6	6	0	Low-quality	Genome-fragment	13.86	AAI-based
A01_idba_2054	5160	No	NA	3	0	0	Low-quality	Genome-fragment	11.5	AAI-based
A01_idba_2058	5153	No	NA	5	0	0	Low-quality	Genome-fragment	12.33	AAI-based
A01_idba_2062	5140	No	NA	5	0	3	Not-determined	Genome-fragment	NA	NA
A01_idba_2064	5131	No	NA	5	0	3	Not-determined	Genome-fragment	NA	NA
A01_idba_2071	5085	No	NA	4	0	4	Not-determined	Genome-fragment	NA	NA
A01_idba_2073	5078	No	NA	6	0	2	Not-determined	Genome-fragment	NA	NA
A01_idba_2074	5077	No	NA	10	4	0	Low-quality	Genome-fragment	12.76	AAI-based
A01_idba_2075	5074	No	NA	6	0	3	Not-determined	Genome-fragment	NA	NA
A01_idba_2076	5073	No	NA	1	0	1	Not-determined	Genome-fragment	NA	NA
A01_idba_2080	5057	No	NA	5	0	4	Not-determined	Genome-fragment	NA	NA
A01_idba_2083	5046	No	NA	9	0	0	Low-quality	Genome-fragment	9.75	AAI-based
A01_idba_2084	5041	No	NA	4	0	4	Low-quality	Genome-fragment	2.71	AAI-based
A01_idba_2091	5026	No	NA	7	3	1	Low-quality	Genome-fragment	8.4	AAI-based
A01_idba_2093	5022	No	NA	4	1	0	Low-quality	Genome-fragment	3.76	AAI-based
A01_idba_2094	5020	No	NA	7	2	0	Low-quality	Genome-fragment	8.62	AAI-based
A01_idba_2095	5017	No	NA	2	0	2	Low-quality	Genome-fragment	1.85	AAI-based
A01_idba_2098	5006	No	NA	4	0	3	Not-determined	Genome-fragment	NA	NA
A01_idba_2099	5003	No	NA	5	0	1	Low-quality	Genome-fragment	8.27	AAI-based
A02_idba_2	477706	No	NA	431	0	341	Not-determined	Genome-fragment	NA	NA
A02_idba_6	183878	No	NA	206	18	4	Complete	High-quality	100	DTR
A02_idba_7	174570	No	NA	139	0	111	Not-determined	Genome-fragment	NA	NA
A02_idba_8	170458	No	NA	177	26	6	Complete	High-quality	100	DTR
A02_idba_10	147091	No	NA	204	37	3	High-quality	High-quality	99.87	AAI-based
A02_idba_14	144024	No	NA	143	0	92	Not-determined	Genome-fragment	NA	NA
A02_idba_15	142957	Yes	47441	150	21	59	Complete	High-quality	100	Provirus
A02_idba_16	142898	No	NA	142	1	72	High-quality	High-quality	91.3	HMM-based
A02_idba_18	141738	Yes	21515	159	9	99	Low-quality	Genome-fragment	35.61	AAI-based
A02_idba_21	132345	No	NA	119	2	96	Medium-quality	Genome-fragment	66.82	HMM-based
A02_idba_22	132115	No	NA	104	0	64	Not-determined	Genome-fragment	NA	NA
A02_idba_23	131093	No	NA	117	0	102	Not-determined	Genome-fragment	NA	NA
A02_idba_24	127417	No	NA	176	34	3	High-quality	High-quality	95.7	AAI-based
A02_idba_25	125450	No	NA	133	8	3	Medium-quality	Genome-fragment	71.28	AAI-based
A02_idba_27	123855	No	NA	105	0	72	Not-determined	Genome-fragment	NA	NA
A02_idba_30	120636	No	NA	127	0	98	Not-determined	Genome-fragment	NA	NA
A02_idba_31	119265	No	NA	95	0	70	Not-determined	Genome-fragment	NA	NA
A02_idba_37	109213	No	NA	109	3	39	Medium-quality	Genome-fragment	74.99	HMM-based
A02_idba_39	103905	No	NA	88	0	52	Not-determined	Genome-fragment	NA	NA
A02_idba_41	101874	No	NA	85	1	48	High-quality	High-quality	100	HMM-based
A02_idba_43	100052	No	NA	104	16	1	High-quality	High-quality	100	AAI-based
A02_idba_45	98640	No	NA	106	0	44	Not-determined	Genome-fragment	NA	NA
A02_idba_46	98586	No	NA	111	1	63	Low-quality	Genome-fragment	44.45	HMM-based
A02_idba_49	94513	No	NA	134	22	1	Complete	High-quality	100	DTR
A02_idba_50	94109	Yes	83212	89	10	5	Complete	High-quality	100	DTR
A02_idba_51	94028	No	NA	94	11	1	Complete	High-quality	100	DTR
A02_idba_57	87608	Yes	46167	95	24	17	Medium-quality	Genome-fragment	69.86	AAI-based
A02_idba_58	82705	No	NA	138	21	1	Complete	High-quality	100	DTR
A02_idba_61	81671	No	NA	57	0	43	Not-determined	Genome-fragment	NA	NA
A02_idba_65	79446	No	NA	99	13	0	Complete	High-quality	100	DTR
A02_idba_66	78474	No	NA	118	26	5	High-quality	High-quality	97.62	AAI-based
A02_idba_67	78243	No	NA	70	0	53	Not-determined	Genome-fragment	NA	NA
A02_idba_70	77200	No	NA	100	12	1	Complete	High-quality	100	DTR
A02_idba_73	75438	No	NA	113	15	1	Medium-quality	Genome-fragment	84.87	AAI-based
A02_idba_74	74933	No	NA	113	19	4	Medium-quality	Genome-fragment	54.38	AAI-based
A02_idba_76	73557	No	NA	98	6	6	Medium-quality	Genome-fragment	68.24	HMM-based
A02_idba_77	72874	No	NA	63	0	52	Not-determined	Genome-fragment	NA	NA
A02_idba_80	71661	No	NA	63	0	37	Not-determined	Genome-fragment	NA	NA
A02_idba_82	70914	No	NA	79	0	46	Not-determined	Genome-fragment	NA	NA
A02_idba_83	70804	No	NA	104	15	3	High-quality	High-quality	100	AAI-based
A02_idba_88	67573	No	NA	60	0	44	Not-determined	Genome-fragment	NA	NA
A02_idba_92	67161	No	NA	67	1	28	High-quality	High-quality	100	HMM-based
A02_idba_98	65952	No	NA	100	29	4	Complete	High-quality	100	DTR
A02_idba_100	65543	No	NA	77	0	58	Not-determined	Genome-fragment	NA	NA
A02_idba_101	65410	No	NA	109	29	1	High-quality	High-quality	100	AAI-based
A02_idba_102	65160	No	NA	89	23	1	Complete	High-quality	100	DTR
A02_idba_103	65072	No	NA	65	0	62	Not-determined	Genome-fragment	NA	NA
A02_idba_104	64852	No	NA	96	33	1	High-quality	High-quality	100	AAI-based
A02_idba_106	63726	No	NA	74	12	4	Complete	High-quality	100	DTR
A02_idba_107	63443	No	NA	42	0	19	Not-determined	Genome-fragment	NA	NA
A02_idba_108	62764	No	NA	69	16	1	Low-quality	Genome-fragment	45.85	AAI-based
A02_idba_112	62108	No	NA	99	20	0	High-quality	High-quality	99.38	AAI-based
A02_idba_113	62020	No	NA	99	17	2	Complete	High-quality	100	DTR
A02_idba_114	61994	No	NA	93	31	1	High-quality	High-quality	99.72	AAI-based
A02_idba_115	61958	No	NA	45	0	32	Not-determined	Genome-fragment	NA	NA
A02_idba_116	61839	No	NA	78	18	0	High-quality	High-quality	91.35	AAI-based
A02_idba_121	60815	No	NA	78	20	0	High-quality	High-quality	100	AAI-based
A02_idba_124	59912	No	NA	81	32	1	High-quality	High-quality	100	AAI-based
A02_idba_127	59047	Yes	56098	102	16	3	Complete	High-quality	100	DTR
A02_idba_132	58377	No	NA	78	15	1	Medium-quality	Genome-fragment	58.86	AAI-based
A02_idba_133	58264	No	NA	51	1	27	Not-determined	Genome-fragment	NA	NA
A02_idba_136	57281	No	NA	76	23	1	High-quality	High-quality	95.86	AAI-based
A02_idba_142	55905	Yes	54766	64	11	5	High-quality	High-quality	100	AAI-based
A02_idba_144	55523	Yes	45895	59	24	5	Medium-quality	Genome-fragment	85.78	AAI-based
A02_idba_148	55089	No	NA	53	0	21	Not-determined	Genome-fragment	NA	NA
A02_idba_151	54072	Yes	13863	68	9	19	Low-quality	Genome-fragment	21.79	HMM-based
A02_idba_155	53601	No	NA	44	0	36	Not-determined	Genome-fragment	NA	NA
A02_idba_157	53123	Yes	10761	49	5	24	Low-quality	Genome-fragment	14.62	HMM-based
A02_idba_163	51643	Yes	36833	59	22	12	Medium-quality	Genome-fragment	55.25	HMM-based
A02_idba_166	51151	No	NA	48	0	38	Not-determined	Genome-fragment	NA	NA
A02_idba_171	50679	Yes	12944	57	6	27	Low-quality	Genome-fragment	16.34	HMM-based
A02_idba_173	50408	No	NA	49	1	36	Medium-quality	Genome-fragment	81.72	HMM-based
A02_idba_174	50371	No	NA	90	18	1	Complete	High-quality	100	DTR
A02_idba_175	50104	No	NA	92	20	0	Complete	High-quality	100	DTR
A02_idba_176	50057	No	NA	49	0	35	Not-determined	Genome-fragment	NA	NA
A02_idba_179	49860	No	NA	58	16	0	Medium-quality	Genome-fragment	86.12	AAI-based
A02_idba_181	49450	No	NA	60	0	19	Not-determined	Genome-fragment	NA	NA
A02_idba_182	49397	No	NA	39	0	16	Not-determined	Genome-fragment	NA	NA
A02_idba_185	48915	No	NA	77	29	1	Complete	High-quality	100	DTR
A02_idba_186	48837	No	NA	67	12	1	Complete	High-quality	100	DTR
A02_idba_189	48569	No	NA	46	0	41	Not-determined	Genome-fragment	NA	NA
A02_idba_193	47975	No	NA	47	3	0	Medium-quality	Genome-fragment	51.5	AAI-based
A02_idba_194	47884	No	NA	69	18	1	High-quality	High-quality	92.74	AAI-based
A02_idba_198	47336	No	NA	50	1	10	Low-quality	Genome-fragment	25.67	HMM-based
A02_idba_199	46773	No	NA	47	0	39	Not-determined	Genome-fragment	NA	NA
A02_idba_202	46134	No	NA	83	19	1	Medium-quality	Genome-fragment	75.62	AAI-based
A02_idba_207	45742	No	NA	66	18	1	High-quality	High-quality	97.72	AAI-based
A02_idba_208	45682	No	NA	73	23	0	Complete	High-quality	100	DTR
A02_idba_209	45531	No	NA	61	11	1	Complete	High-quality	100	DTR
A02_idba_210	45530	No	NA	59	22	0	Complete	High-quality	100	DTR
A02_idba_211	45433	No	NA	75	13	0	Complete	High-quality	100	DTR
A02_idba_212	44778	Yes	42044	69	9	4	Complete	High-quality	100	DTR
A02_idba_213	44676	No	NA	43	1	20	Low-quality	Genome-fragment	20.67	HMM-based
A02_idba_215	44437	No	NA	31	0	25	Not-determined	Genome-fragment	NA	NA
A02_idba_216	44310	No	NA	42	1	10	High-quality	High-quality	100	HMM-based
A02_idba_217	44264	No	NA	48	0	26	Not-determined	Genome-fragment	NA	NA
A02_idba_218	44121	No	NA	79	14	2	Complete	High-quality	100	DTR
A02_idba_219	44113	No	NA	48	5	3	High-quality	High-quality	100	AAI-based
A02_idba_223	43861	No	NA	64	20	1	Complete	High-quality	100	DTR
A02_idba_225	43354	No	NA	41	18	0	Low-quality	Genome-fragment	32.47	AAI-based
A02_idba_226	43347	No	NA	35	0	30	Not-determined	Genome-fragment	NA	NA
A02_idba_227	43216	No	NA	50	0	12	Not-determined	Genome-fragment	NA	NA
A02_idba_232	42603	No	NA	55	13	1	Complete	High-quality	100	DTR
A02_idba_234	42490	No	NA	44	14	0	Complete	High-quality	100	DTR
A02_idba_235	42453	No	NA	66	27	1	Complete	High-quality	100	DTR
A02_idba_237	42334	Yes	5942	42	4	25	Low-quality	Genome-fragment	9.08	HMM-based
A02_idba_240	42149	No	NA	29	1	2	Low-quality	Genome-fragment	22.98	AAI-based
A02_idba_244	41484	No	NA	54	0	15	Low-quality	Genome-fragment	38.96	AAI-based
A02_idba_246	41156	No	NA	56	24	0	Complete	High-quality	100	DTR
A02_idba_247	40998	No	NA	64	20	0	Complete	High-quality	100	DTR
A02_idba_249	40950	No	NA	65	16	1	Complete	High-quality	100	DTR
A02_idba_250	40911	No	NA	43	10	0	High-quality	High-quality	99.06	AAI-based
A02_idba_251	40890	No	NA	37	1	7	Low-quality	Genome-fragment	22.18	HMM-based
A02_idba_252	40782	No	NA	43	13	0	Medium-quality	Genome-fragment	70.03	AAI-based
A02_idba_253	40758	No	NA	53	3	0	Complete	High-quality	100	DTR
A02_idba_254	40758	No	NA	77	17	1	Complete	High-quality	100	DTR
A02_idba_256	40490	No	NA	52	26	1	High-quality	High-quality	97.52	AAI-based
A02_idba_259	40267	No	NA	42	0	40	Not-determined	Genome-fragment	NA	NA
A02_idba_261	40160	No	NA	35	0	27	Not-determined	Genome-fragment	NA	NA
A02_idba_262	40137	No	NA	39	7	1	High-quality	High-quality	93.71	AAI-based
A02_idba_264	40009	No	NA	34	0	23	Low-quality	Genome-fragment	38.29	AAI-based
A02_idba_265	40008	No	NA	50	7	2	Low-quality	Genome-fragment	48.94	AAI-based
A02_idba_266	40008	No	NA	65	20	1	Complete	High-quality	100	DTR
A02_idba_267	40006	No	NA	53	7	0	Complete	High-quality	100	DTR
A02_idba_268	39967	Yes	27927	52	10	6	Medium-quality	Genome-fragment	51.24	AAI-based
A02_idba_269	39932	No	NA	48	6	0	High-quality	High-quality	93.53	AAI-based
A02_idba_271	39794	No	NA	56	21	0	Medium-quality	Genome-fragment	89.05	AAI-based
A02_idba_273	39686	No	NA	55	24	2	High-quality	High-quality	94.8	AAI-based
A02_idba_274	39667	No	NA	55	15	1	Complete	High-quality	100	DTR
A02_idba_276	39455	No	NA	68	24	3	Complete	High-quality	100	ITR
A02_idba_277	39429	No	NA	62	14	2	Medium-quality	Genome-fragment	69.46	AAI-based
A02_idba_279	39283	No	NA	42	8	1	Complete	High-quality	100	DTR
A02_idba_281	39098	No	NA	41	0	23	Not-determined	Genome-fragment	NA	NA
A02_idba_283	38811	No	NA	32	0	26	Not-determined	Genome-fragment	NA	NA
A02_idba_285	38594	No	NA	37	10	2	Low-quality	Genome-fragment	37.4	AAI-based
A02_idba_289	37988	Yes	36026	57	22	2	High-quality	High-quality	96.13	AAI-based
A02_idba_298	37255	No	NA	57	20	1	High-quality	High-quality	100	AAI-based
A02_idba_300	37181	No	NA	29	0	26	Not-determined	Genome-fragment	NA	NA
A02_idba_305	37031	No	NA	47	11	1	Low-quality	Genome-fragment	37.88	HMM-based
A02_idba_306	36940	No	NA	74	18	0	Complete	High-quality	100	DTR
A02_idba_307	36926	No	NA	55	17	0	High-quality	High-quality	100	AAI-based
A02_idba_311	35977	No	NA	53	24	0	High-quality	High-quality	100	AAI-based
A02_idba_324	35196	No	NA	52	14	1	High-quality	High-quality	97.96	AAI-based
A02_idba_326	34950	No	NA	33	0	6	Not-determined	Genome-fragment	NA	NA
A02_idba_328	34833	No	NA	50	15	0	Complete	High-quality	100	DTR
A02_idba_330	34700	No	NA	8	0	5	Not-determined	Genome-fragment	NA	NA
A02_idba_331	34678	No	NA	44	21	0	Medium-quality	Genome-fragment	66.97	AAI-based
A02_idba_332	34617	No	NA	21	4	0	Low-quality	Genome-fragment	33.2	AAI-based
A02_idba_337	34138	No	NA	48	9	0	Medium-quality	Genome-fragment	67.75	HMM-based
A02_idba_340	33942	No	NA	46	19	1	Medium-quality	Genome-fragment	83.46	AAI-based
A02_idba_344	33629	No	NA	47	11	0	Complete	High-quality	100	DTR
A02_idba_347	33381	No	NA	55	18	2	Low-quality	Genome-fragment	49.83	HMM-based
A02_idba_348	33222	No	NA	31	1	18	Medium-quality	Genome-fragment	77.79	HMM-based
A02_idba_349	33115	No	NA	31	0	6	Medium-quality	Genome-fragment	59.38	AAI-based
A02_idba_352	32774	No	NA	34	7	2	Low-quality	Genome-fragment	31.27	AAI-based
A02_idba_354	32724	No	NA	34	0	30	Not-determined	Genome-fragment	NA	NA
A02_idba_361	32201	No	NA	41	7	0	Medium-quality	Genome-fragment	71.26	AAI-based
A02_idba_363	32149	No	NA	46	25	0	Medium-quality	Genome-fragment	68.7	AAI-based
A02_idba_364	32119	No	NA	59	21	0	Complete	High-quality	100	ITR
A02_idba_368	31854	No	NA	59	16	1	Medium-quality	Genome-fragment	85.32	AAI-based
A02_idba_371	31666	No	NA	21	0	14	Not-determined	Genome-fragment	NA	NA
A02_idba_372	31662	No	NA	27	0	20	Not-determined	Genome-fragment	NA	NA
A02_idba_375	31481	No	NA	19	0	16	Not-determined	Genome-fragment	NA	NA
A02_idba_376	31477	Yes	29274	57	17	2	Medium-quality	Genome-fragment	79.41	AAI-based
A02_idba_377	31368	No	NA	37	9	1	Medium-quality	Genome-fragment	73.33	AAI-based
A02_idba_378	31312	No	NA	55	5	1	Low-quality	Genome-fragment	30.17	AAI-based
A02_idba_381	31044	Yes	22399	33	9	4	Medium-quality	Genome-fragment	53.18	AAI-based
A02_idba_389	30551	No	NA	35	21	1	Medium-quality	Genome-fragment	88.43	AAI-based
A02_idba_392	30198	No	NA	28	4	1	Low-quality	Genome-fragment	27.2	AAI-based
A02_idba_393	30181	No	NA	25	0	18	Not-determined	Genome-fragment	NA	NA
A02_idba_408	29159	Yes	8458	22	3	6	Low-quality	Genome-fragment	12.33	HMM-based
A02_idba_410	28762	No	NA	30	1	0	Low-quality	Genome-fragment	31.64	AAI-based
A02_idba_412	28690	No	NA	17	3	1	Low-quality	Genome-fragment	44.85	AAI-based
A02_idba_414	28681	No	NA	35	14	1	Medium-quality	Genome-fragment	55.17	AAI-based
A02_idba_415	28613	No	NA	41	11	0	Medium-quality	Genome-fragment	65.92	AAI-based
A02_idba_416	28603	No	NA	32	0	15	Not-determined	Genome-fragment	NA	NA
A02_idba_418	28530	No	NA	24	0	9	Low-quality	Genome-fragment	41.37	AAI-based
A02_idba_419	28481	No	NA	20	0	17	Not-determined	Genome-fragment	NA	NA
A02_idba_420	28364	No	NA	26	0	21	Not-determined	Genome-fragment	NA	NA
A02_idba_421	28255	No	NA	46	15	0	Medium-quality	Genome-fragment	78.8	AAI-based
A02_idba_428	28021	No	NA	47	20	2	High-quality	High-quality	91.95	AAI-based
A02_idba_430	27993	No	NA	43	7	1	Low-quality	Genome-fragment	45.94	AAI-based
A02_idba_432	27891	No	NA	30	0	16	Not-determined	Genome-fragment	NA	NA
A02_idba_435	27732	No	NA	27	3	0	Medium-quality	Genome-fragment	54.53	AAI-based
A02_idba_440	27504	No	NA	25	0	20	Not-determined	Genome-fragment	NA	NA
A02_idba_441	27408	No	NA	38	9	1	Low-quality	Genome-fragment	45.47	AAI-based
A02_idba_442	27189	Yes	7858	27	2	14	Low-quality	Genome-fragment	18.37	HMM-based
A02_idba_444	27138	No	NA	28	0	21	Not-determined	Genome-fragment	NA	NA
A02_idba_445	26946	No	NA	25	19	0	Low-quality	Genome-fragment	38.11	AAI-based
A02_idba_449	26688	No	NA	42	7	1	Low-quality	Genome-fragment	42.71	AAI-based
A02_idba_452	26328	No	NA	45	7	0	Medium-quality	Genome-fragment	50.88	AAI-based
A02_idba_457	26104	No	NA	34	9	1	Low-quality	Genome-fragment	38.55	AAI-based
A02_idba_459	26081	No	NA	43	5	0	Medium-quality	Genome-fragment	66.02	AAI-based
A02_idba_463	25949	No	NA	42	20	0	Medium-quality	Genome-fragment	72.79	AAI-based
A02_idba_465	25903	Yes	15311	34	6	7	Low-quality	Genome-fragment	35.94	AAI-based
A02_idba_469	25761	No	NA	23	0	23	Not-determined	Genome-fragment	NA	NA
A02_idba_472	25587	No	NA	36	6	2	Low-quality	Genome-fragment	18.89	AAI-based
A02_idba_473	25566	No	NA	25	10	2	Medium-quality	Genome-fragment	63.76	AAI-based
A02_idba_476	25500	No	NA	31	18	0	Low-quality	Genome-fragment	48.12	HMM-based
A02_idba_487	24976	Yes	13065	23	4	5	Low-quality	Genome-fragment	15.62	HMM-based
A02_idba_488	24973	No	NA	44	21	0	Medium-quality	Genome-fragment	71.3	AAI-based
A02_idba_490	24862	No	NA	28	18	0	Medium-quality	Genome-fragment	59.37	AAI-based
A02_idba_500	24537	No	NA	25	3	1	Low-quality	Genome-fragment	28.32	AAI-based
A02_idba_507	24375	No	NA	16	0	5	Not-determined	Genome-fragment	NA	NA
A02_idba_509	24299	No	NA	41	14	1	Medium-quality	Genome-fragment	71.81	AAI-based
A02_idba_510	24250	No	NA	35	2	2	Low-quality	Genome-fragment	35.66	AAI-based
A02_idba_514	24133	No	NA	27	3	1	Low-quality	Genome-fragment	34.67	AAI-based
A02_idba_515	24055	No	NA	27	0	7	Not-determined	Genome-fragment	NA	NA
A02_idba_523	23649	No	NA	25	13	0	Low-quality	Genome-fragment	47.61	AAI-based
A02_idba_525	23604	No	NA	20	0	4	Low-quality	Genome-fragment	42.33	AAI-based
A02_idba_528	23458	No	NA	35	23	0	Medium-quality	Genome-fragment	54	AAI-based
A02_idba_531	23340	No	NA	42	7	0	Medium-quality	Genome-fragment	57.07	AAI-based
A02_idba_534	23304	No	NA	28	7	0	Low-quality	Genome-fragment	15.13	AAI-based
A02_idba_539	23074	No	NA	19	0	14	Not-determined	Genome-fragment	NA	NA
A02_idba_542	22921	No	NA	26	0	24	Not-determined	Genome-fragment	NA	NA
A02_idba_544	22850	No	NA	29	3	1	Medium-quality	Genome-fragment	53.55	AAI-based
A02_idba_546	22686	No	NA	31	4	1	Low-quality	Genome-fragment	39.33	AAI-based
A02_idba_547	22641	No	NA	19	0	15	Low-quality	Genome-fragment	19.37	AAI-based
A02_idba_549	22480	No	NA	23	0	14	Not-determined	Genome-fragment	NA	NA
A02_idba_550	22474	No	NA	21	1	7	Low-quality	Genome-fragment	26.6	AAI-based
A02_idba_551	22410	No	NA	28	12	1	Medium-quality	Genome-fragment	58.77	AAI-based
A02_idba_555	22277	No	NA	17	3	2	Low-quality	Genome-fragment	17.8	AAI-based
A02_idba_557	22172	No	NA	21	0	18	Low-quality	Genome-fragment	11.93	AAI-based
A02_idba_567	21909	No	NA	34	9	0	Medium-quality	Genome-fragment	59.09	AAI-based
A02_idba_569	21879	No	NA	18	1	0	Low-quality	Genome-fragment	22.33	AAI-based
A02_idba_571	21780	No	NA	19	0	15	Not-determined	Genome-fragment	NA	NA
A02_idba_573	21762	No	NA	27	0	8	Not-determined	Genome-fragment	NA	NA
A02_idba_575	21722	No	NA	49	7	1	Low-quality	Genome-fragment	26.95	AAI-based
A02_idba_577	21623	No	NA	35	0	31	Not-determined	Genome-fragment	NA	NA
A02_idba_579	21555	No	NA	35	9	1	Medium-quality	Genome-fragment	56.54	AAI-based
A02_idba_584	21297	No	NA	31	3	0	Low-quality	Genome-fragment	22.86	AAI-based
A02_idba_589	21230	No	NA	16	0	15	Not-determined	Genome-fragment	NA	NA
A02_idba_590	21222	No	NA	17	0	9	Not-determined	Genome-fragment	NA	NA
A02_idba_592	21200	No	NA	32	11	0	Low-quality	Genome-fragment	31.96	AAI-based
A02_idba_593	21146	No	NA	24	0	12	Not-determined	Genome-fragment	NA	NA
A02_idba_594	21133	No	NA	27	16	0	Medium-quality	Genome-fragment	56.29	AAI-based
A02_idba_596	21067	No	NA	17	0	12	Not-determined	Genome-fragment	NA	NA
A02_idba_599	20984	No	NA	30	8	1	Medium-quality	Genome-fragment	60.27	AAI-based
A02_idba_602	20884	No	NA	28	2	0	Low-quality	Genome-fragment	48.98	AAI-based
A02_idba_604	20781	No	NA	43	7	0	Low-quality	Genome-fragment	46.09	AAI-based
A02_idba_606	20718	No	NA	18	4	1	Low-quality	Genome-fragment	23.68	AAI-based
A02_idba_608	20712	No	NA	29	11	0	Low-quality	Genome-fragment	49.28	AAI-based
A02_idba_615	20670	No	NA	25	1	6	Low-quality	Genome-fragment	34.52	AAI-based
A02_idba_618	20585	No	NA	26	1	1	Low-quality	Genome-fragment	46.09	AAI-based
A02_idba_621	20562	No	NA	27	15	1	Medium-quality	Genome-fragment	64.44	AAI-based
A02_idba_628	20257	No	NA	23	0	8	Not-determined	Genome-fragment	NA	NA
A02_idba_630	20216	No	NA	16	0	7	Not-determined	Genome-fragment	NA	NA
A02_idba_631	20208	No	NA	29	6	0	Medium-quality	Genome-fragment	52.84	AAI-based
A02_idba_632	20154	No	NA	23	5	0	Low-quality	Genome-fragment	28.83	AAI-based
A02_idba_633	20142	Yes	7372	27	5	10	Low-quality	Genome-fragment	9.77	HMM-based
A02_idba_640	20037	No	NA	19	0	1	Low-quality	Genome-fragment	39.13	AAI-based
A02_idba_644	19865	No	NA	50	4	0	Low-quality	Genome-fragment	24.09	HMM-based
A02_idba_645	19863	No	NA	16	2	0	Low-quality	Genome-fragment	11.29	AAI-based
A02_idba_646	19817	Yes	17184	30	2	2	Complete	High-quality	100	DTR
A02_idba_648	19762	No	NA	27	10	0	Low-quality	Genome-fragment	44.22	AAI-based
A02_idba_649	19704	No	NA	18	0	18	Not-determined	Genome-fragment	NA	NA
A02_idba_655	19416	No	NA	42	5	1	Low-quality	Genome-fragment	32.7	AAI-based
A02_idba_656	19406	No	NA	37	2	1	Low-quality	Genome-fragment	47.03	AAI-based
A02_idba_658	19393	No	NA	21	1	0	Low-quality	Genome-fragment	10.7	AAI-based
A02_idba_660	19308	No	NA	25	10	0	Low-quality	Genome-fragment	45.6	AAI-based
A02_idba_662	19290	No	NA	21	11	0	Medium-quality	Genome-fragment	54.96	AAI-based
A02_idba_663	19262	No	NA	31	15	0	Medium-quality	Genome-fragment	76.15	AAI-based
A02_idba_664	19136	No	NA	10	1	0	Low-quality	Genome-fragment	10.48	AAI-based
A02_idba_666	19078	No	NA	15	0	14	Not-determined	Genome-fragment	NA	NA
A02_idba_671	18968	No	NA	19	0	14	Not-determined	Genome-fragment	NA	NA
A02_idba_673	18885	No	NA	16	0	5	Not-determined	Genome-fragment	NA	NA
A02_idba_674	18880	No	NA	23	12	0	Low-quality	Genome-fragment	48.76	AAI-based
A02_idba_685	18597	No	NA	19	6	0	Low-quality	Genome-fragment	11.69	AAI-based
A02_idba_689	18520	No	NA	31	3	1	Low-quality	Genome-fragment	10.09	AAI-based
A02_idba_690	18364	No	NA	22	9	0	Low-quality	Genome-fragment	45.22	AAI-based
A02_idba_691	18347	No	NA	16	0	6	Not-determined	Genome-fragment	NA	NA
A02_idba_693	18321	No	NA	19	1	0	Low-quality	Genome-fragment	10.41	AAI-based
A02_idba_694	18232	No	NA	28	7	0	Low-quality	Genome-fragment	22.86	AAI-based
A02_idba_698	18105	No	NA	43	6	2	Low-quality	Genome-fragment	23.94	AAI-based
A02_idba_701	18059	No	NA	18	8	0	Low-quality	Genome-fragment	13.59	AAI-based
A02_idba_705	17995	No	NA	24	7	0	Low-quality	Genome-fragment	33.01	AAI-based
A02_idba_706	17961	No	NA	33	8	0	Low-quality	Genome-fragment	39.27	AAI-based
A02_idba_714	17740	Yes	8917	19	6	4	Low-quality	Genome-fragment	20.34	AAI-based
A02_idba_719	17613	No	NA	30	8	2	Low-quality	Genome-fragment	41.98	AAI-based
A02_idba_720	17612	No	NA	17	12	0	Low-quality	Genome-fragment	29.32	AAI-based
A02_idba_723	17515	No	NA	31	10	0	Low-quality	Genome-fragment	29.28	AAI-based
A02_idba_724	17492	No	NA	34	4	0	Low-quality	Genome-fragment	45.43	AAI-based
A02_idba_727	17373	No	NA	17	4	0	Low-quality	Genome-fragment	19.87	AAI-based
A02_idba_728	17292	No	NA	22	0	4	Not-determined	Genome-fragment	NA	NA
A02_idba_729	17234	No	NA	21	9	0	Low-quality	Genome-fragment	41.61	AAI-based
A02_idba_730	17221	No	NA	15	0	13	Not-determined	Genome-fragment	NA	NA
A02_idba_738	17074	No	NA	15	0	6	Not-determined	Genome-fragment	NA	NA
A02_idba_739	17069	No	NA	32	16	0	Low-quality	Genome-fragment	47.18	AAI-based
A02_idba_740	17026	No	NA	32	0	30	Not-determined	Genome-fragment	NA	NA
A02_idba_742	16990	No	NA	23	8	2	Low-quality	Genome-fragment	27.62	AAI-based
A02_idba_743	16987	No	NA	13	0	3	Not-determined	Genome-fragment	NA	NA
A02_idba_744	16960	No	NA	32	4	1	Low-quality	Genome-fragment	32.62	AAI-based
A02_idba_745	16932	No	NA	7	2	0	Low-quality	Genome-fragment	12	AAI-based
A02_idba_747	16880	No	NA	10	1	8	Low-quality	Genome-fragment	4.49	AAI-based
A02_idba_751	16849	No	NA	23	7	0	Low-quality	Genome-fragment	37.22	AAI-based
A02_idba_753	16729	No	NA	21	8	0	Medium-quality	Genome-fragment	84.34	AAI-based
A02_idba_755	16681	No	NA	27	5	0	Low-quality	Genome-fragment	41.39	AAI-based
A02_idba_760	16526	No	NA	20	9	0	Medium-quality	Genome-fragment	72.34	AAI-based
A02_idba_761	16516	No	NA	15	1	8	Low-quality	Genome-fragment	4.95	HMM-based
A02_idba_764	16498	No	NA	14	0	4	Not-determined	Genome-fragment	NA	NA
A02_idba_766	16490	No	NA	23	11	0	Medium-quality	Genome-fragment	73.16	AAI-based
A02_idba_767	16489	No	NA	20	8	0	Low-quality	Genome-fragment	40.28	AAI-based
A02_idba_769	16444	No	NA	32	11	1	Low-quality	Genome-fragment	33.88	AAI-based
A02_idba_773	16359	No	NA	30	6	0	Low-quality	Genome-fragment	20.22	AAI-based
A02_idba_774	16356	No	NA	18	0	15	Not-determined	Genome-fragment	NA	NA
A02_idba_776	16355	No	NA	37	9	0	Low-quality	Genome-fragment	22.61	HMM-based
A02_idba_777	16319	No	NA	20	8	0	Medium-quality	Genome-fragment	72.02	AAI-based
A02_idba_778	16307	No	NA	26	7	0	Low-quality	Genome-fragment	33.82	AAI-based
A02_idba_780	16246	No	NA	22	9	0	Medium-quality	Genome-fragment	71.06	AAI-based
A02_idba_784	16169	No	NA	23	10	0	Medium-quality	Genome-fragment	73.33	AAI-based
A02_idba_786	16159	No	NA	32	0	31	Not-determined	Genome-fragment	NA	NA
A02_idba_787	16148	No	NA	12	0	6	Not-determined	Genome-fragment	NA	NA
A02_idba_789	16130	Yes	10802	19	10	4	Low-quality	Genome-fragment	23.46	AAI-based
A02_idba_791	16049	No	NA	23	6	0	Medium-quality	Genome-fragment	71.18	AAI-based
A02_idba_792	16045	No	NA	19	5	0	Medium-quality	Genome-fragment	53.41	HMM-based
A02_idba_802	15914	No	NA	17	0	15	Not-determined	Genome-fragment	NA	NA
A02_idba_803	15901	No	NA	14	0	10	Not-determined	Genome-fragment	NA	NA
A02_idba_807	15852	No	NA	21	11	0	Low-quality	Genome-fragment	33.05	AAI-based
A02_idba_808	15836	No	NA	18	0	3	Not-determined	Genome-fragment	NA	NA
A02_idba_813	15776	No	NA	10	0	10	Low-quality	Genome-fragment	12.79	AAI-based
A02_idba_816	15758	No	NA	24	7	0	Medium-quality	Genome-fragment	66.5	AAI-based
A02_idba_819	15733	No	NA	28	8	0	Low-quality	Genome-fragment	36.15	AAI-based
A02_idba_820	15708	No	NA	25	9	0	Low-quality	Genome-fragment	20.57	AAI-based
A02_idba_821	15699	No	NA	26	9	0	Low-quality	Genome-fragment	34.88	AAI-based
A02_idba_824	15640	No	NA	21	1	5	Low-quality	Genome-fragment	23.67	HMM-based
A02_idba_825	15637	No	NA	30	4	0	Low-quality	Genome-fragment	17.53	AAI-based
A02_idba_827	15559	No	NA	15	2	2	Low-quality	Genome-fragment	19.06	HMM-based
A02_idba_829	15512	No	NA	24	6	0	Low-quality	Genome-fragment	26.92	AAI-based
A02_idba_831	15487	No	NA	19	14	0	Low-quality	Genome-fragment	40.7	AAI-based
A02_idba_833	15460	No	NA	35	2	0	Low-quality	Genome-fragment	19.46	AAI-based
A02_idba_839	15360	No	NA	27	3	0	Low-quality	Genome-fragment	26.38	AAI-based
A02_idba_846	15189	No	NA	9	0	5	Low-quality	Genome-fragment	16.69	AAI-based
A02_idba_847	15156	No	NA	17	1	2	Low-quality	Genome-fragment	16.98	AAI-based
A02_idba_850	15094	No	NA	7	0	3	Not-determined	Genome-fragment	NA	NA
A02_idba_851	15079	No	NA	13	3	0	Low-quality	Genome-fragment	43.54	AAI-based
A02_idba_855	15027	No	NA	12	0	10	Low-quality	Genome-fragment	4.6	AAI-based
A02_idba_856	15027	No	NA	14	0	13	Not-determined	Genome-fragment	NA	NA
A02_idba_857	14986	No	NA	11	0	8	Not-determined	Genome-fragment	NA	NA
A02_idba_858	14953	Yes	13286	23	16	2	Low-quality	Genome-fragment	20.38	HMM-based
A02_idba_859	14937	No	NA	28	2	0	Low-quality	Genome-fragment	8.14	AAI-based
A02_idba_864	14800	No	NA	30	4	0	Low-quality	Genome-fragment	22.26	AAI-based
A02_idba_865	14800	No	NA	22	4	0	Low-quality	Genome-fragment	25.64	AAI-based
A02_idba_866	14798	No	NA	14	0	12	Low-quality	Genome-fragment	5.29	AAI-based
A02_idba_867	14786	No	NA	19	7	0	Low-quality	Genome-fragment	29.92	AAI-based
A02_idba_868	14773	No	NA	5	1	0	Low-quality	Genome-fragment	15.86	AAI-based
A02_idba_870	14752	No	NA	24	5	0	Low-quality	Genome-fragment	24.83	AAI-based
A02_idba_874	14669	No	NA	18	0	12	Not-determined	Genome-fragment	NA	NA
A02_idba_875	14624	No	NA	8	0	8	Not-determined	Genome-fragment	NA	NA
A02_idba_876	14619	No	NA	32	4	0	Low-quality	Genome-fragment	33.84	AAI-based
A02_idba_883	14494	No	NA	36	5	1	Low-quality	Genome-fragment	25.04	AAI-based
A02_idba_886	14477	No	NA	18	0	4	Not-determined	Genome-fragment	NA	NA
A02_idba_889	14359	No	NA	16	0	11	Not-determined	Genome-fragment	NA	NA
A02_idba_893	14263	No	NA	11	0	8	Not-determined	Genome-fragment	NA	NA
A02_idba_895	14239	No	NA	18	2	0	Low-quality	Genome-fragment	30.92	AAI-based
A02_idba_897	14225	No	NA	17	8	0	Low-quality	Genome-fragment	45.5	HMM-based
A02_idba_902	14139	No	NA	20	6	0	Medium-quality	Genome-fragment	63.99	AAI-based
A02_idba_904	14099	No	NA	22	2	0	Low-quality	Genome-fragment	11.24	AAI-based
A02_idba_908	14008	No	NA	19	0	9	Not-determined	Genome-fragment	NA	NA
A02_idba_910	13957	No	NA	28	4	0	Low-quality	Genome-fragment	35.19	AAI-based
A02_idba_912	13946	No	NA	13	0	8	Not-determined	Genome-fragment	NA	NA
A02_idba_913	13944	No	NA	21	2	0	Low-quality	Genome-fragment	35.8	AAI-based
A02_idba_919	13793	No	NA	14	0	9	Not-determined	Genome-fragment	NA	NA
A02_idba_921	13788	No	NA	10	0	7	Not-determined	Genome-fragment	NA	NA
A02_idba_922	13777	No	NA	18	2	0	Low-quality	Genome-fragment	36.8	AAI-based
A02_idba_928	13707	No	NA	17	7	0	Low-quality	Genome-fragment	45.3	HMM-based
A02_idba_936	13580	No	NA	17	11	0	Low-quality	Genome-fragment	35.14	AAI-based
A02_idba_947	13365	No	NA	25	7	0	Low-quality	Genome-fragment	38.63	AAI-based
A02_idba_950	13310	No	NA	11	0	7	Not-determined	Genome-fragment	NA	NA
A02_idba_951	13259	No	NA	26	2	0	Low-quality	Genome-fragment	15.14	AAI-based
A02_idba_954	13222	No	NA	15	12	0	Low-quality	Genome-fragment	27.65	AAI-based
A02_idba_957	13172	No	NA	14	1	0	Low-quality	Genome-fragment	12.66	AAI-based
A02_idba_958	13163	No	NA	16	2	0	Low-quality	Genome-fragment	20.67	AAI-based
A02_idba_959	13151	No	NA	22	0	0	Low-quality	Genome-fragment	9.94	AAI-based
A02_idba_961	13127	No	NA	17	3	0	Low-quality	Genome-fragment	40.83	HMM-based
A02_idba_963	13117	No	NA	14	3	0	Low-quality	Genome-fragment	24.67	HMM-based
A02_idba_965	13100	No	NA	17	0	8	Not-determined	Genome-fragment	NA	NA
A02_idba_966	13080	No	NA	30	7	0	Low-quality	Genome-fragment	31.98	AAI-based
A02_idba_971	13000	No	NA	17	1	0	Low-quality	Genome-fragment	8.07	AAI-based
A02_idba_976	12917	No	NA	9	0	4	Not-determined	Genome-fragment	NA	NA
A02_idba_978	12868	No	NA	19	0	12	Low-quality	Genome-fragment	14	AAI-based
A02_idba_979	12868	No	NA	8	1	0	Low-quality	Genome-fragment	14.8	AAI-based
A02_idba_983	12783	No	NA	18	1	1	Low-quality	Genome-fragment	30.66	AAI-based
A02_idba_988	12679	No	NA	13	0	12	Not-determined	Genome-fragment	NA	NA
A02_idba_991	12570	No	NA	22	1	0	Low-quality	Genome-fragment	25.12	AAI-based
A02_idba_993	12535	No	NA	13	3	1	Low-quality	Genome-fragment	21.25	AAI-based
A02_idba_997	12523	No	NA	24	5	0	Low-quality	Genome-fragment	19.79	AAI-based
A02_idba_1000	12504	No	NA	11	1	0	Low-quality	Genome-fragment	11.83	AAI-based
A02_idba_1005	12354	No	NA	12	0	4	Not-determined	Genome-fragment	NA	NA
A02_idba_1009	12317	No	NA	13	2	0	Low-quality	Genome-fragment	25.5	HMM-based
A02_idba_1014	12247	No	NA	8	0	7	Not-determined	Genome-fragment	NA	NA
A02_idba_1015	12238	No	NA	12	4	1	Low-quality	Genome-fragment	15.18	AAI-based
A02_idba_1021	12175	No	NA	3	1	0	Low-quality	Genome-fragment	19.33	AAI-based
A02_idba_1022	12166	No	NA	21	4	2	Low-quality	Genome-fragment	6.67	AAI-based
A02_idba_1029	12044	No	NA	30	2	1	Low-quality	Genome-fragment	23.73	AAI-based
A02_idba_1031	12020	No	NA	15	8	0	Low-quality	Genome-fragment	27.99	AAI-based
A02_idba_1034	12004	No	NA	15	1	0	Low-quality	Genome-fragment	28.76	AAI-based
A02_idba_1035	12001	No	NA	23	5	0	Low-quality	Genome-fragment	26.64	AAI-based
A02_idba_1040	11934	No	NA	10	0	7	Not-determined	Genome-fragment	NA	NA
A02_idba_1043	11883	No	NA	12	3	0	Low-quality	Genome-fragment	25.42	AAI-based
A02_idba_1045	11811	No	NA	2	1	0	Low-quality	Genome-fragment	12.68	AAI-based
A02_idba_1048	11744	No	NA	8	0	7	Not-determined	Genome-fragment	NA	NA
A02_idba_1050	11722	No	NA	25	2	1	Low-quality	Genome-fragment	13.19	AAI-based
A02_idba_1052	11706	No	NA	15	1	0	Low-quality	Genome-fragment	3.81	HMM-based
A02_idba_1055	11678	No	NA	21	8	0	Low-quality	Genome-fragment	31.13	AAI-based
A02_idba_1056	11658	No	NA	14	0	14	Not-determined	Genome-fragment	NA	NA
A02_idba_1060	11632	No	NA	12	0	2	Not-determined	Genome-fragment	NA	NA
A02_idba_1062	11588	No	NA	13	2	0	Low-quality	Genome-fragment	14.67	AAI-based
A02_idba_1063	11587	No	NA	15	2	0	Low-quality	Genome-fragment	6.35	AAI-based
A02_idba_1065	11539	No	NA	14	4	0	Low-quality	Genome-fragment	20.07	AAI-based
A02_idba_1066	11537	No	NA	10	0	9	Not-determined	Genome-fragment	NA	NA
A02_idba_1081	11417	No	NA	13	8	0	Low-quality	Genome-fragment	25.63	AAI-based
A02_idba_1083	11403	No	NA	26	5	0	Low-quality	Genome-fragment	18.82	AAI-based
A02_idba_1086	11382	No	NA	19	1	0	Low-quality	Genome-fragment	24.22	AAI-based
A02_idba_1087	11371	No	NA	14	3	0	Low-quality	Genome-fragment	38.03	HMM-based
A02_idba_1089	11358	No	NA	14	0	5	Not-determined	Genome-fragment	NA	NA
A02_idba_1092	11293	No	NA	13	1	0	High-quality	High-quality	100	HMM-based
A02_idba_1103	11150	No	NA	23	2	0	Low-quality	Genome-fragment	21.41	AAI-based
A02_idba_1108	11103	No	NA	8	1	0	Low-quality	Genome-fragment	17.42	AAI-based
A02_idba_1110	11086	No	NA	10	0	9	Not-determined	Genome-fragment	NA	NA
A02_idba_1113	11041	No	NA	22	2	0	Low-quality	Genome-fragment	20.59	AAI-based
A02_idba_1117	11012	No	NA	20	3	0	Low-quality	Genome-fragment	6	AAI-based
A02_idba_1123	10909	No	NA	22	3	0	Low-quality	Genome-fragment	8.7	AAI-based
A02_idba_1128	10839	No	NA	9	0	9	Not-determined	Genome-fragment	NA	NA
A02_idba_1129	10838	No	NA	6	2	0	Low-quality	Genome-fragment	27.99	AAI-based
A02_idba_1130	10831	No	NA	14	6	0	Low-quality	Genome-fragment	23.33	AAI-based
A02_idba_1131	10828	No	NA	11	2	0	Low-quality	Genome-fragment	18.68	AAI-based
A02_idba_1135	10768	No	NA	17	0	0	Not-determined	Genome-fragment	NA	NA
A02_idba_1142	10714	No	NA	7	0	4	Low-quality	Genome-fragment	29.31	AAI-based
A02_idba_1144	10692	No	NA	11	1	2	Low-quality	Genome-fragment	16.18	HMM-based
A02_idba_1147	10657	No	NA	15	6	0	Low-quality	Genome-fragment	31.81	AAI-based
A02_idba_1149	10648	No	NA	21	1	2	Low-quality	Genome-fragment	21.33	HMM-based
A02_idba_1152	10634	No	NA	14	0	3	Not-determined	Genome-fragment	NA	NA
A02_idba_1153	10632	No	NA	16	4	0	Low-quality	Genome-fragment	20.76	AAI-based
A02_idba_1160	10555	No	NA	10	0	8	Not-determined	Genome-fragment	NA	NA
A02_idba_1164	10507	No	NA	5	0	4	Not-determined	Genome-fragment	NA	NA
A02_idba_1166	10463	No	NA	22	5	0	Low-quality	Genome-fragment	21.41	AAI-based
A02_idba_1167	10452	No	NA	10	0	5	Not-determined	Genome-fragment	NA	NA
A02_idba_1172	10413	Yes	5070	10	1	1	Low-quality	Genome-fragment	2.35	AAI-based
A02_idba_1177	10384	No	NA	7	0	1	Not-determined	Genome-fragment	NA	NA
A02_idba_1183	10319	No	NA	13	1	5	High-quality	High-quality	100	HMM-based
A02_idba_1185	10312	No	NA	11	2	0	Low-quality	Genome-fragment	10.59	AAI-based
A02_idba_1188	10280	No	NA	12	1	0	Low-quality	Genome-fragment	12.7	AAI-based
A02_idba_1190	10268	No	NA	11	0	9	Low-quality	Genome-fragment	2.37	AAI-based
A02_idba_1192	10241	No	NA	4	1	0	Low-quality	Genome-fragment	11.05	AAI-based
A02_idba_1195	10221	No	NA	23	2	0	Low-quality	Genome-fragment	8.04	AAI-based
A02_idba_1197	10176	No	NA	10	0	7	Not-determined	Genome-fragment	NA	NA
A02_idba_1200	10149	No	NA	10	0	0	Low-quality	Genome-fragment	11.24	AAI-based
A02_idba_1204	10116	No	NA	11	1	0	Low-quality	Genome-fragment	10.23	AAI-based
A02_idba_1206	10103	No	NA	15	6	0	Low-quality	Genome-fragment	24.16	AAI-based
A02_idba_1209	10095	No	NA	17	1	1	Low-quality	Genome-fragment	14.4	AAI-based
A02_idba_1210	10091	No	NA	9	7	0	Low-quality	Genome-fragment	26.33	AAI-based
A02_idba_1217	10018	No	NA	12	6	0	Low-quality	Genome-fragment	19.7	AAI-based
A02_idba_1219	10015	No	NA	11	0	0	Not-determined	Genome-fragment	NA	NA
A02_idba_1223	9997	No	NA	13	2	1	Low-quality	Genome-fragment	19.95	HMM-based
A02_idba_1225	9991	No	NA	16	0	8	Not-determined	Genome-fragment	NA	NA
A02_idba_1226	9988	No	NA	8	2	0	Low-quality	Genome-fragment	7.59	AAI-based
A02_idba_1232	9951	No	NA	8	0	7	Not-determined	Genome-fragment	NA	NA
A02_idba_1238	9906	No	NA	6	0	5	Not-determined	Genome-fragment	NA	NA
A02_idba_1240	9877	No	NA	18	10	0	Low-quality	Genome-fragment	22.42	AAI-based
A02_idba_1246	9860	No	NA	12	6	0	Low-quality	Genome-fragment	22.95	AAI-based
A02_idba_1248	9818	No	NA	14	2	0	Low-quality	Genome-fragment	8.25	AAI-based
A02_idba_1250	9804	No	NA	15	4	0	Low-quality	Genome-fragment	23.87	AAI-based
A02_idba_1251	9804	No	NA	13	1	0	Low-quality	Genome-fragment	17.55	AAI-based
A02_idba_1255	9763	No	NA	23	2	0	Low-quality	Genome-fragment	23.16	AAI-based
A02_idba_1257	9750	No	NA	14	5	0	Low-quality	Genome-fragment	15.85	AAI-based
A02_idba_1261	9730	No	NA	14	1	0	Low-quality	Genome-fragment	15.73	AAI-based
A02_idba_1262	9724	No	NA	16	6	0	Low-quality	Genome-fragment	4.51	AAI-based
A02_idba_1264	9695	No	NA	12	4	0	Low-quality	Genome-fragment	14.7	AAI-based
A02_idba_1267	9671	No	NA	15	3	0	Low-quality	Genome-fragment	11.99	AAI-based
A02_idba_1269	9653	No	NA	15	4	0	Medium-quality	Genome-fragment	61.01	AAI-based
A02_idba_1271	9642	No	NA	18	4	0	Low-quality	Genome-fragment	17.01	AAI-based
A02_idba_1272	9638	No	NA	16	5	0	Low-quality	Genome-fragment	25.76	AAI-based
A02_idba_1274	9624	No	NA	7	0	6	Not-determined	Genome-fragment	NA	NA
A02_idba_1280	9578	No	NA	8	0	7	Not-determined	Genome-fragment	NA	NA
A02_idba_1289	9484	No	NA	14	0	3	Not-determined	Genome-fragment	NA	NA
A02_idba_1292	9463	No	NA	8	3	0	Low-quality	Genome-fragment	20.98	AAI-based
A02_idba_1296	9440	No	NA	14	7	0	Low-quality	Genome-fragment	23.4	AAI-based
A02_idba_1300	9410	No	NA	2	0	0	Low-quality	Genome-fragment	10.12	AAI-based
A02_idba_1304	9385	Yes	6164	13	10	3	Low-quality	Genome-fragment	13.24	AAI-based
A02_idba_1314	9308	No	NA	14	3	0	Low-quality	Genome-fragment	31.53	HMM-based
A02_idba_1318	9285	No	NA	14	0	1	Not-determined	Genome-fragment	NA	NA
A02_idba_1324	9252	No	NA	5	0	0	Low-quality	Genome-fragment	5.18	AAI-based
A02_idba_1326	9207	No	NA	13	1	3	Not-determined	Genome-fragment	NA	NA
A02_idba_1327	9205	No	NA	15	2	0	Low-quality	Genome-fragment	20.64	AAI-based
A02_idba_1336	9136	No	NA	9	0	9	Not-determined	Genome-fragment	NA	NA
A02_idba_1338	9129	No	NA	10	0	7	Not-determined	Genome-fragment	NA	NA
A02_idba_1343	9084	Yes	7344	10	1	2	Low-quality	Genome-fragment	6.63	AAI-based
A02_idba_1350	9053	No	NA	4	0	0	Low-quality	Genome-fragment	22.22	AAI-based
A02_idba_1354	9037	No	NA	8	0	1	Not-determined	Genome-fragment	NA	NA
A02_idba_1355	9033	No	NA	12	4	0	Low-quality	Genome-fragment	11.48	AAI-based
A02_idba_1359	9016	No	NA	9	0	8	Low-quality	Genome-fragment	4.37	AAI-based
A02_idba_1361	9012	No	NA	11	5	0	Medium-quality	Genome-fragment	50.16	AAI-based
A02_idba_1375	8895	No	NA	8	0	0	Low-quality	Genome-fragment	9.42	AAI-based
A02_idba_1382	8869	No	NA	12	0	7	Not-determined	Genome-fragment	NA	NA
A02_idba_1383	8858	No	NA	13	3	1	Low-quality	Genome-fragment	18.13	AAI-based
A02_idba_1384	8847	No	NA	17	3	0	Low-quality	Genome-fragment	11.05	AAI-based
A02_idba_1388	8826	No	NA	11	0	0	Low-quality	Genome-fragment	14.74	AAI-based
A02_idba_1389	8824	No	NA	25	5	0	Low-quality	Genome-fragment	22.34	AAI-based
A02_idba_1397	8792	No	NA	14	4	0	Low-quality	Genome-fragment	8.34	AAI-based
A02_idba_1402	8768	No	NA	10	0	9	Not-determined	Genome-fragment	NA	NA
A02_idba_1403	8756	No	NA	13	8	0	Low-quality	Genome-fragment	25.12	AAI-based
A02_idba_1404	8756	No	NA	13	12	0	Low-quality	Genome-fragment	18.56	AAI-based
A02_idba_1405	8751	No	NA	7	0	3	Not-determined	Genome-fragment	NA	NA
A02_idba_1411	8727	No	NA	10	3	0	Low-quality	Genome-fragment	48.58	AAI-based
A02_idba_1412	8726	No	NA	9	0	1	Not-determined	Genome-fragment	NA	NA
A02_idba_1414	8712	No	NA	14	7	0	Low-quality	Genome-fragment	17.52	AAI-based
A02_idba_1416	8699	No	NA	4	0	1	Low-quality	Genome-fragment	8.33	AAI-based
A02_idba_1420	8639	No	NA	12	0	2	Not-determined	Genome-fragment	NA	NA
A02_idba_1422	8634	No	NA	12	8	0	Low-quality	Genome-fragment	22.74	AAI-based
A02_idba_1424	8631	No	NA	23	1	0	Low-quality	Genome-fragment	25.84	HMM-based
A02_idba_1426	8582	Yes	7324	13	2	2	Low-quality	Genome-fragment	17.05	AAI-based
A02_idba_1427	8580	No	NA	15	4	0	Low-quality	Genome-fragment	15.4	AAI-based
A02_idba_1433	8537	No	NA	6	3	0	Low-quality	Genome-fragment	19.02	AAI-based
A02_idba_1436	8507	No	NA	16	0	0	Not-determined	Genome-fragment	NA	NA
A02_idba_1439	8492	No	NA	13	3	0	Low-quality	Genome-fragment	18.02	HMM-based
A02_idba_1440	8491	No	NA	11	0	0	Low-quality	Genome-fragment	4.82	AAI-based
A02_idba_1449	8455	No	NA	10	2	0	Low-quality	Genome-fragment	8.08	AAI-based
A02_idba_1451	8442	No	NA	12	3	0	Low-quality	Genome-fragment	17.09	AAI-based
A02_idba_1454	8421	No	NA	2	1	0	Low-quality	Genome-fragment	5.82	HMM-based
A02_idba_1456	8407	No	NA	9	0	4	Low-quality	Genome-fragment	5.59	AAI-based
A02_idba_1469	8328	No	NA	17	2	0	Medium-quality	Genome-fragment	50.04	AAI-based
A02_idba_1471	8325	No	NA	12	3	0	Low-quality	Genome-fragment	13.05	AAI-based
A02_idba_1475	8310	No	NA	7	0	6	Not-determined	Genome-fragment	NA	NA
A02_idba_1477	8299	No	NA	7	0	7	Low-quality	Genome-fragment	2.53	AAI-based
A02_idba_1478	8298	No	NA	11	2	0	Low-quality	Genome-fragment	10.32	AAI-based
A02_idba_1480	8290	No	NA	8	0	7	Low-quality	Genome-fragment	27.59	AAI-based
A02_idba_1482	8280	Yes	6221	10	3	1	Low-quality	Genome-fragment	13.89	AAI-based
A02_idba_1483	8278	No	NA	11	4	1	Low-quality	Genome-fragment	16.68	AAI-based
A02_idba_1484	8277	No	NA	6	0	4	Low-quality	Genome-fragment	5.37	AAI-based
A02_idba_1488	8251	No	NA	6	2	0	Low-quality	Genome-fragment	13.52	AAI-based
A02_idba_1491	8238	No	NA	16	1	1	Low-quality	Genome-fragment	17.08	AAI-based
A02_idba_1499	8185	No	NA	6	0	3	Not-determined	Genome-fragment	NA	NA
A02_idba_1500	8185	No	NA	16	2	1	Low-quality	Genome-fragment	6.53	AAI-based
A02_idba_1502	8174	No	NA	5	0	3	Not-determined	Genome-fragment	NA	NA
A02_idba_1504	8155	No	NA	9	0	5	Not-determined	Genome-fragment	NA	NA
A02_idba_1511	8115	No	NA	6	1	0	Low-quality	Genome-fragment	8	AAI-based
A02_idba_1517	8069	No	NA	8	0	6	Not-determined	Genome-fragment	NA	NA
A02_idba_1520	8062	No	NA	11	4	0	Low-quality	Genome-fragment	5.26	AAI-based
A02_idba_1521	8060	No	NA	17	2	0	Low-quality	Genome-fragment	16.75	AAI-based
A02_idba_1523	8044	No	NA	12	9	0	Low-quality	Genome-fragment	22.99	AAI-based
A02_idba_1526	8031	No	NA	11	4	0	Low-quality	Genome-fragment	6.03	AAI-based
A02_idba_1527	8028	No	NA	17	1	1	Low-quality	Genome-fragment	5.05	HMM-based
A02_idba_1529	8020	No	NA	12	1	0	Low-quality	Genome-fragment	15.92	AAI-based
A02_idba_1532	8012	No	NA	3	0	2	Not-determined	Genome-fragment	NA	NA
A02_idba_1533	8012	No	NA	14	6	0	Low-quality	Genome-fragment	17.8	AAI-based
A02_idba_1536	7984	No	NA	9	0	9	Not-determined	Genome-fragment	NA	NA
A02_idba_1539	7965	No	NA	10	2	0	Low-quality	Genome-fragment	10.11	AAI-based
A02_idba_1541	7951	Yes	6190	9	3	1	Low-quality	Genome-fragment	7.21	AAI-based
A02_idba_1546	7910	No	NA	11	0	1	Low-quality	Genome-fragment	18.05	AAI-based
A02_idba_1552	7886	No	NA	6	0	2	Not-determined	Genome-fragment	NA	NA
A02_idba_1555	7853	No	NA	11	6	0	Low-quality	Genome-fragment	18.58	AAI-based
A02_idba_1556	7849	No	NA	9	7	0	Low-quality	Genome-fragment	18.63	AAI-based
A02_idba_1558	7837	No	NA	12	3	0	Low-quality	Genome-fragment	13.33	AAI-based
A02_idba_1559	7835	No	NA	8	0	6	Low-quality	Genome-fragment	3.63	AAI-based
A02_idba_1560	7831	No	NA	9	1	0	Low-quality	Genome-fragment	8.27	AAI-based
A02_idba_1563	7805	Yes	3862	9	1	3	Low-quality	Genome-fragment	9.99	AAI-based
A02_idba_1580	7698	No	NA	19	2	0	Low-quality	Genome-fragment	13.36	AAI-based
A02_idba_1581	7696	No	NA	2	0	0	Low-quality	Genome-fragment	4.19	AAI-based
A02_idba_1586	7688	Yes	4146	12	2	3	Low-quality	Genome-fragment	8.01	AAI-based
A02_idba_1590	7663	No	NA	16	1	0	Low-quality	Genome-fragment	17.31	AAI-based
A02_idba_1593	7643	No	NA	18	3	0	Low-quality	Genome-fragment	13.54	AAI-based
A02_idba_1598	7623	No	NA	8	0	3	Not-determined	Genome-fragment	NA	NA
A02_idba_1601	7600	No	NA	14	0	1	Not-determined	Genome-fragment	NA	NA
A02_idba_1606	7569	No	NA	15	0	2	Not-determined	Genome-fragment	NA	NA
A02_idba_1609	7549	No	NA	12	2	1	Low-quality	Genome-fragment	8.65	AAI-based
A02_idba_1612	7523	No	NA	1	0	0	Low-quality	Genome-fragment	3.43	AAI-based
A02_idba_1614	7515	No	NA	5	0	5	Low-quality	Genome-fragment	0.65	AAI-based
A02_idba_1623	7461	No	NA	8	0	3	Not-determined	Genome-fragment	NA	NA
A02_idba_1628	7431	No	NA	9	0	6	Not-determined	Genome-fragment	NA	NA
A02_idba_1630	7423	No	NA	8	7	0	Low-quality	Genome-fragment	11.2	AAI-based
A02_idba_1638	7367	No	NA	7	0	1	Not-determined	Genome-fragment	NA	NA
A02_idba_1642	7354	No	NA	12	1	0	Low-quality	Genome-fragment	6.6	HMM-based
A02_idba_1644	7346	Yes	5484	15	2	2	Low-quality	Genome-fragment	16.06	AAI-based
A02_idba_1646	7341	Yes	2169	8	1	2	Low-quality	Genome-fragment	2.05	AAI-based
A02_idba_1648	7319	No	NA	3	0	1	Low-quality	Genome-fragment	8.92	AAI-based
A02_idba_1656	7290	No	NA	11	0	0	Not-determined	Genome-fragment	NA	NA
A02_idba_1668	7235	No	NA	1	0	0	Low-quality	Genome-fragment	7.93	AAI-based
A02_idba_1671	7211	No	NA	7	0	5	Low-quality	Genome-fragment	1.94	AAI-based
A02_idba_1672	7207	No	NA	5	0	4	Not-determined	Genome-fragment	NA	NA
A02_idba_1676	7196	No	NA	2	0	2	Low-quality	Genome-fragment	3.07	AAI-based
A02_idba_1684	7159	No	NA	12	0	0	Low-quality	Genome-fragment	17.9	AAI-based
A02_idba_1687	7134	No	NA	7	0	7	Not-determined	Genome-fragment	NA	NA
A02_idba_1690	7118	No	NA	5	0	4	Not-determined	Genome-fragment	NA	NA
A02_idba_1695	7102	No	NA	7	3	0	Low-quality	Genome-fragment	15.22	AAI-based
A02_idba_1700	7076	No	NA	17	0	0	Low-quality	Genome-fragment	3.29	AAI-based
A02_idba_1716	7008	No	NA	10	7	0	Low-quality	Genome-fragment	15.56	AAI-based
A02_idba_1720	6977	No	NA	1	0	0	Not-determined	Genome-fragment	NA	NA
A02_idba_1731	6918	Yes	5675	7	1	1	Low-quality	Genome-fragment	3.99	HMM-based
A02_idba_1732	6917	Yes	5383	8	1	1	Low-quality	Genome-fragment	2.5	AAI-based
A02_idba_1733	6917	No	NA	9	1	0	Low-quality	Genome-fragment	7.99	AAI-based
A02_idba_1736	6896	No	NA	5	0	5	Not-determined	Genome-fragment	NA	NA
A02_idba_1737	6895	No	NA	13	2	0	Low-quality	Genome-fragment	8.1	AAI-based
A02_idba_1739	6889	No	NA	12	1	0	Low-quality	Genome-fragment	19.7	AAI-based
A02_idba_1744	6871	No	NA	9	0	1	Not-determined	Genome-fragment	NA	NA
A02_idba_1745	6870	No	NA	13	4	0	Low-quality	Genome-fragment	4.28	AAI-based
A02_idba_1748	6857	No	NA	19	2	0	Low-quality	Genome-fragment	14.95	AAI-based
A02_idba_1757	6827	No	NA	12	2	1	Low-quality	Genome-fragment	11.84	AAI-based
A02_idba_1759	6823	Yes	4990	7	2	1	Low-quality	Genome-fragment	3.8	AAI-based
A02_idba_1760	6821	No	NA	9	0	1	Low-quality	Genome-fragment	7.13	AAI-based
A02_idba_1770	6777	No	NA	13	1	0	Low-quality	Genome-fragment	13.64	AAI-based
A02_idba_1771	6776	No	NA	4	0	2	Not-determined	Genome-fragment	NA	NA
A02_idba_1773	6773	No	NA	3	0	0	Low-quality	Genome-fragment	4.89	AAI-based
A02_idba_1779	6729	No	NA	11	2	0	Low-quality	Genome-fragment	29.67	AAI-based
A02_idba_1780	6724	No	NA	7	0	7	Low-quality	Genome-fragment	2.61	AAI-based
A02_idba_1784	6703	No	NA	3	0	1	Not-determined	Genome-fragment	NA	NA
A02_idba_1790	6686	No	NA	5	0	5	Not-determined	Genome-fragment	NA	NA
A02_idba_1794	6678	No	NA	8	0	0	Low-quality	Genome-fragment	6.56	AAI-based
A02_idba_1797	6674	No	NA	4	0	0	Not-determined	Genome-fragment	NA	NA
A02_idba_1799	6667	No	NA	2	0	1	Not-determined	Genome-fragment	NA	NA
A02_idba_1804	6661	No	NA	7	0	6	Low-quality	Genome-fragment	5.34	AAI-based
A02_idba_1807	6643	No	NA	6	0	3	Not-determined	Genome-fragment	NA	NA
A02_idba_1811	6641	No	NA	1	0	1	Not-determined	Genome-fragment	NA	NA
A02_idba_1817	6626	No	NA	8	0	2	Not-determined	Genome-fragment	NA	NA
A02_idba_1820	6615	No	NA	4	0	0	Not-determined	Genome-fragment	NA	NA
A02_idba_1825	6598	No	NA	9	6	0	Low-quality	Genome-fragment	14.3	AAI-based
A02_idba_1828	6589	No	NA	6	0	2	Not-determined	Genome-fragment	NA	NA
A02_idba_1830	6584	No	NA	5	0	5	Not-determined	Genome-fragment	NA	NA
A02_idba_1833	6563	No	NA	6	0	6	Not-determined	Genome-fragment	NA	NA
A02_idba_1834	6556	No	NA	6	0	6	Not-determined	Genome-fragment	NA	NA
A02_idba_1838	6548	No	NA	9	2	0	Low-quality	Genome-fragment	13.8	HMM-based
A02_idba_1839	6546	Yes	1937	10	2	6	Low-quality	Genome-fragment	3.15	AAI-based
A02_idba_1842	6531	No	NA	6	0	0	Low-quality	Genome-fragment	8.51	AAI-based
A02_idba_1847	6522	No	NA	11	0	2	Low-quality	Genome-fragment	6.63	AAI-based
A02_idba_1848	6522	No	NA	3	0	0	Not-determined	Genome-fragment	NA	NA
A02_idba_1851	6510	No	NA	4	0	3	Low-quality	Genome-fragment	3.12	AAI-based
A02_idba_1859	6464	No	NA	8	1	0	Low-quality	Genome-fragment	3.5	HMM-based
A02_idba_1862	6456	No	NA	11	2	0	Low-quality	Genome-fragment	3	AAI-based
A02_idba_1869	6428	No	NA	19	5	0	Low-quality	Genome-fragment	7.38	HMM-based
A02_idba_1871	6417	No	NA	16	2	0	Low-quality	Genome-fragment	4.61	HMM-based
A02_idba_1887	6372	No	NA	8	3	0	Low-quality	Genome-fragment	12.06	AAI-based
A02_idba_1898	6330	No	NA	13	1	0	Low-quality	Genome-fragment	3.45	AAI-based
A02_idba_1901	6320	No	NA	5	0	1	Not-determined	Genome-fragment	NA	NA
A02_idba_1905	6307	No	NA	6	0	6	Not-determined	Genome-fragment	NA	NA
A02_idba_1910	6292	No	NA	8	6	0	Low-quality	Genome-fragment	18.17	AAI-based
A02_idba_1911	6291	No	NA	11	0	2	Not-determined	Genome-fragment	NA	NA
A02_idba_1931	6169	No	NA	6	3	0	Low-quality	Genome-fragment	21.77	HMM-based
A02_idba_1949	6104	No	NA	7	0	4	Not-determined	Genome-fragment	NA	NA
A02_idba_1950	6101	No	NA	5	0	4	Not-determined	Genome-fragment	NA	NA
A02_idba_1953	6084	No	NA	3	1	0	Low-quality	Genome-fragment	6.52	AAI-based
A02_idba_1955	6070	No	NA	7	0	1	Low-quality	Genome-fragment	9.28	AAI-based
A02_idba_1959	6057	No	NA	7	1	0	Low-quality	Genome-fragment	5.3	HMM-based
A02_idba_1961	6046	No	NA	7	0	0	Low-quality	Genome-fragment	6.51	AAI-based
A02_idba_1966	6035	No	NA	9	6	0	Low-quality	Genome-fragment	16.04	AAI-based
A02_idba_1978	5975	No	NA	11	0	0	Low-quality	Genome-fragment	4.74	AAI-based
A02_idba_1986	5961	No	NA	3	3	0	Low-quality	Genome-fragment	3.14	AAI-based
A02_idba_1987	5960	No	NA	13	0	0	Low-quality	Genome-fragment	12.17	AAI-based
A02_idba_1992	5937	No	NA	8	6	0	Low-quality	Genome-fragment	14.77	AAI-based
A02_idba_1994	5933	No	NA	11	2	1	Low-quality	Genome-fragment	7.56	AAI-based
A02_idba_1997	5927	No	NA	4	0	0	Low-quality	Genome-fragment	5.45	AAI-based
A02_idba_1998	5926	No	NA	1	0	1	Not-determined	Genome-fragment	NA	NA
A02_idba_2006	5906	No	NA	6	0	2	Not-determined	Genome-fragment	NA	NA
A02_idba_2007	5905	No	NA	4	1	0	Low-quality	Genome-fragment	11.87	AAI-based
A02_idba_2009	5903	No	NA	1	0	0	Low-quality	Genome-fragment	5.94	AAI-based
A02_idba_2010	5900	No	NA	7	0	7	Low-quality	Genome-fragment	1.68	AAI-based
A02_idba_2012	5898	No	NA	5	0	1	Not-determined	Genome-fragment	NA	NA
A02_idba_2014	5896	Yes	3976	8	3	2	Low-quality	Genome-fragment	5.04	HMM-based
A02_idba_2015	5895	No	NA	10	1	0	Low-quality	Genome-fragment	5.2	AAI-based
A02_idba_2016	5894	No	NA	9	2	0	Low-quality	Genome-fragment	6.33	HMM-based
A02_idba_2018	5890	No	NA	14	3	1	Low-quality	Genome-fragment	7.45	AAI-based
A02_idba_2027	5859	No	NA	6	4	0	Low-quality	Genome-fragment	12.97	AAI-based
A02_idba_2033	5844	No	NA	6	5	0	Low-quality	Genome-fragment	14.4	AAI-based
A02_idba_2036	5839	No	NA	4	0	4	Not-determined	Genome-fragment	NA	NA
A02_idba_2039	5834	No	NA	9	8	0	Low-quality	Genome-fragment	17.19	AAI-based
A02_idba_2040	5828	No	NA	6	0	4	Not-determined	Genome-fragment	NA	NA
A02_idba_2042	5826	No	NA	11	2	0	Low-quality	Genome-fragment	10.71	AAI-based
A02_idba_2044	5824	No	NA	8	1	0	Low-quality	Genome-fragment	41.93	AAI-based
A02_idba_2046	5822	No	NA	5	3	0	Low-quality	Genome-fragment	6.6	AAI-based
A02_idba_2053	5806	No	NA	10	3	0	Low-quality	Genome-fragment	6.74	AAI-based
A02_idba_2058	5795	No	NA	5	5	0	Low-quality	Genome-fragment	4.26	AAI-based
A02_idba_2067	5764	No	NA	6	4	0	Low-quality	Genome-fragment	27.61	AAI-based
A02_idba_2080	5733	No	NA	10	3	0	Low-quality	Genome-fragment	4.3	AAI-based
A02_idba_2083	5718	No	NA	1	0	1	Not-determined	Genome-fragment	NA	NA
A02_idba_2085	5706	No	NA	6	0	0	Not-determined	Genome-fragment	NA	NA
A02_idba_2095	5678	No	NA	7	0	1	Not-determined	Genome-fragment	NA	NA
A02_idba_2099	5670	No	NA	5	0	5	Low-quality	Genome-fragment	7.73	AAI-based
A02_idba_2100	5668	No	NA	12	0	0	Not-determined	Genome-fragment	NA	NA
A02_idba_2103	5663	No	NA	5	0	3	Not-determined	Genome-fragment	NA	NA
A02_idba_2104	5662	No	NA	7	0	3	Not-determined	Genome-fragment	NA	NA
A02_idba_2112	5638	No	NA	5	0	2	Not-determined	Genome-fragment	NA	NA
A02_idba_2118	5621	No	NA	2	0	0	Not-determined	Genome-fragment	NA	NA
A02_idba_2120	5619	No	NA	4	0	3	Low-quality	Genome-fragment	3.02	AAI-based
A02_idba_2123	5615	No	NA	9	0	4	Not-determined	Genome-fragment	NA	NA
A02_idba_2124	5613	No	NA	4	0	2	Not-determined	Genome-fragment	NA	NA
A02_idba_2125	5611	No	NA	4	0	0	Low-quality	Genome-fragment	8.89	AAI-based
A02_idba_2127	5609	No	NA	6	0	3	Not-determined	Genome-fragment	NA	NA
A02_idba_2129	5600	No	NA	8	0	0	Not-determined	Genome-fragment	NA	NA
A02_idba_2138	5562	No	NA	7	0	4	Not-determined	Genome-fragment	NA	NA
A02_idba_2139	5561	No	NA	9	2	0	Low-quality	Genome-fragment	4.18	AAI-based
A02_idba_2144	5550	No	NA	2	0	1	Not-determined	Genome-fragment	NA	NA
A02_idba_2155	5507	No	NA	7	2	0	Low-quality	Genome-fragment	19.81	HMM-based
A02_idba_2157	5501	Yes	3116	8	1	1	Low-quality	Genome-fragment	2.09	HMM-based
A02_idba_2164	5489	No	NA	12	5	0	Low-quality	Genome-fragment	14.44	AAI-based
A02_idba_2166	5475	No	NA	1	0	0	Low-quality	Genome-fragment	14.5	AAI-based
A02_idba_2168	5469	No	NA	7	1	1	Low-quality	Genome-fragment	4.22	AAI-based
A02_idba_2171	5458	No	NA	7	3	0	Low-quality	Genome-fragment	4	AAI-based
A02_idba_2175	5453	No	NA	10	0	2	Low-quality	Genome-fragment	3.4	AAI-based
A02_idba_2176	5448	No	NA	5	0	2	Not-determined	Genome-fragment	NA	NA
A02_idba_2177	5446	No	NA	5	0	3	Low-quality	Genome-fragment	7.42	AAI-based
A02_idba_2182	5421	No	NA	11	0	0	Low-quality	Genome-fragment	9.87	AAI-based
A02_idba_2185	5414	No	NA	13	0	0	Low-quality	Genome-fragment	5.4	AAI-based
A02_idba_2186	5411	No	NA	3	0	2	Not-determined	Genome-fragment	NA	NA
A02_idba_2187	5409	No	NA	4	1	0	Low-quality	Genome-fragment	4.05	AAI-based
A02_idba_2194	5384	No	NA	12	3	0	Low-quality	Genome-fragment	12.53	AAI-based
A02_idba_2196	5379	No	NA	7	1	0	Low-quality	Genome-fragment	8.69	AAI-based
A02_idba_2198	5371	No	NA	7	0	0	Low-quality	Genome-fragment	5	AAI-based
A02_idba_2199	5371	No	NA	4	0	4	Low-quality	Genome-fragment	0.82	AAI-based
A02_idba_2201	5365	No	NA	4	0	3	Low-quality	Genome-fragment	1.44	AAI-based
A02_idba_2202	5361	No	NA	3	0	3	Not-determined	Genome-fragment	NA	NA
A02_idba_2211	5342	No	NA	6	1	0	Low-quality	Genome-fragment	6.17	AAI-based
A02_idba_2213	5334	No	NA	7	5	0	Low-quality	Genome-fragment	12.37	AAI-based
A02_idba_2214	5332	No	NA	11	0	0	Low-quality	Genome-fragment	10.94	AAI-based
A02_idba_2215	5327	No	NA	9	1	0	Low-quality	Genome-fragment	2.92	AAI-based
A02_idba_2218	5321	No	NA	9	1	0	Low-quality	Genome-fragment	2.47	AAI-based
A02_idba_2219	5317	No	NA	10	0	5	Not-determined	Genome-fragment	NA	NA
A02_idba_2220	5315	No	NA	4	0	1	Not-determined	Genome-fragment	NA	NA
A02_idba_2223	5308	No	NA	5	0	4	Not-determined	Genome-fragment	NA	NA
A02_idba_2227	5304	No	NA	7	1	0	Low-quality	Genome-fragment	8.73	AAI-based
A02_idba_2228	5302	No	NA	7	4	0	Low-quality	Genome-fragment	12.46	AAI-based
A02_idba_2230	5300	No	NA	3	0	3	Not-determined	Genome-fragment	NA	NA
A02_idba_2231	5298	No	NA	6	0	0	Low-quality	Genome-fragment	13.54	AAI-based
A02_idba_2232	5297	No	NA	4	0	3	Not-determined	Genome-fragment	NA	NA
A02_idba_2233	5291	No	NA	13	0	1	Not-determined	Genome-fragment	NA	NA
A02_idba_2237	5281	No	NA	8	0	1	Not-determined	Genome-fragment	NA	NA
A02_idba_2245	5264	No	NA	8	4	0	Low-quality	Genome-fragment	12.13	AAI-based
A02_idba_2252	5241	No	NA	6	0	1	Not-determined	Genome-fragment	NA	NA
A02_idba_2253	5240	No	NA	5	2	0	Low-quality	Genome-fragment	8.99	AAI-based
A02_idba_2256	5234	No	NA	3	0	3	Low-quality	Genome-fragment	4.25	AAI-based
A02_idba_2257	5233	No	NA	4	0	4	Not-determined	Genome-fragment	NA	NA
A02_idba_2261	5225	No	NA	6	0	5	Not-determined	Genome-fragment	NA	NA
A02_idba_2262	5225	No	NA	4	0	2	Not-determined	Genome-fragment	NA	NA
A02_idba_2263	5222	No	NA	5	0	4	Not-determined	Genome-fragment	NA	NA
A02_idba_2266	5216	No	NA	5	0	4	Not-determined	Genome-fragment	NA	NA
A02_idba_2271	5205	No	NA	6	3	0	Low-quality	Genome-fragment	12.13	AAI-based
A02_idba_2273	5199	No	NA	6	0	5	Low-quality	Genome-fragment	3.23	AAI-based
A02_idba_2275	5193	No	NA	4	0	3	Not-determined	Genome-fragment	NA	NA
A02_idba_2287	5168	No	NA	4	3	0	Low-quality	Genome-fragment	13.4	AAI-based
A02_idba_2288	5164	No	NA	4	0	4	Not-determined	Genome-fragment	NA	NA
A02_idba_2298	5147	No	NA	5	2	0	Low-quality	Genome-fragment	15.23	HMM-based
A02_idba_2300	5145	No	NA	6	5	0	Low-quality	Genome-fragment	11.67	AAI-based
A02_idba_2301	5143	No	NA	15	2	0	Low-quality	Genome-fragment	11.17	AAI-based
A02_idba_2302	5142	No	NA	6	0	4	Not-determined	Genome-fragment	NA	NA
A02_idba_2305	5138	No	NA	12	1	2	Low-quality	Genome-fragment	8.91	AAI-based
A02_idba_2306	5138	No	NA	4	3	0	Low-quality	Genome-fragment	13.91	AAI-based
A02_idba_2312	5126	No	NA	8	5	0	Complete	High-quality	100	DTR
A02_idba_2314	5125	No	NA	6	0	2	Not-determined	Genome-fragment	NA	NA
A02_idba_2317	5116	No	NA	11	0	0	Low-quality	Genome-fragment	7.9	AAI-based
A02_idba_2318	5115	No	NA	4	0	3	Not-determined	Genome-fragment	NA	NA
A02_idba_2323	5097	No	NA	4	0	4	Low-quality	Genome-fragment	0.73	AAI-based
A02_idba_2330	5080	No	NA	12	0	0	Low-quality	Genome-fragment	12.48	AAI-based
A02_idba_2333	5075	No	NA	10	0	0	Complete	High-quality	100	DTR
A02_idba_2335	5068	No	NA	6	0	3	Not-determined	Genome-fragment	NA	NA
A02_idba_2341	5048	No	NA	12	3	0	Low-quality	Genome-fragment	2.72	AAI-based
A02_idba_2342	5045	No	NA	5	0	4	Not-determined	Genome-fragment	NA	NA
A02_idba_2344	5041	No	NA	11	4	0	Low-quality	Genome-fragment	12.51	AAI-based
A02_idba_2352	5025	Yes	1674	7	2	2	Low-quality	Genome-fragment	3.72	AAI-based
A02_idba_2359	5012	No	NA	4	0	2	Low-quality	Genome-fragment	9.43	AAI-based
A02_idba_2366	5005	No	NA	6	5	0	Low-quality	Genome-fragment	11.14	AAI-based
A08_idba_1	385507	No	NA	343	1	264	Low-quality	Genome-fragment	31.01	HMM-based
A08_idba_2	240840	No	NA	247	4	165	High-quality	High-quality	100	HMM-based
A08_idba_3	225364	No	NA	208	0	133	Not-determined	Genome-fragment	NA	NA
A08_idba_5	208819	No	NA	211	0	156	Not-determined	Genome-fragment	NA	NA
A08_idba_7	188359	No	NA	163	0	102	Not-determined	Genome-fragment	NA	NA
A08_idba_8	185490	No	NA	215	31	2	Complete	High-quality	100	DTR
A08_idba_10	173161	No	NA	174	0	92	Not-determined	Genome-fragment	NA	NA
A08_idba_17	149381	No	NA	195	13	2	High-quality	High-quality	97.1	AAI-based
A08_idba_18	145839	No	NA	174	34	5	Complete	High-quality	100	DTR
A08_idba_21	138434	Yes	132024	187	36	6	Complete	High-quality	100	DTR
A08_idba_24	131276	No	NA	156	15	6	Medium-quality	Genome-fragment	71.91	AAI-based
A08_idba_31	99932	No	NA	98	18	2	High-quality	High-quality	98.84	AAI-based
A08_idba_33	99473	No	NA	85	0	66	Not-determined	Genome-fragment	NA	NA
A08_idba_37	89664	No	NA	89	2	53	Medium-quality	Genome-fragment	87.77	HMM-based
A08_idba_38	89318	No	NA	157	28	2	Complete	High-quality	100	DTR
A08_idba_41	87581	No	NA	74	0	55	Not-determined	Genome-fragment	NA	NA
A08_idba_73	64197	Yes	62006	95	26	6	Medium-quality	Genome-fragment	61.13	AAI-based
A08_idba_75	63305	No	NA	66	0	34	Not-determined	Genome-fragment	NA	NA
A08_idba_77	61957	No	NA	90	36	1	High-quality	High-quality	100	AAI-based
A08_idba_83	61179	No	NA	93	21	0	Complete	High-quality	100	DTR
A08_idba_87	60282	No	NA	83	14	3	High-quality	High-quality	100	AAI-based
A08_idba_91	59050	No	NA	46	7	0	Medium-quality	Genome-fragment	58.23	AAI-based
A08_idba_94	57268	No	NA	81	32	1	Complete	High-quality	100	DTR
A08_idba_99	55842	No	NA	74	8	1	Medium-quality	Genome-fragment	56.38	AAI-based
A08_idba_102	54680	Yes	24411	56	5	21	Low-quality	Genome-fragment	27.4	HMM-based
A08_idba_103	54242	No	NA	83	23	1	Complete	High-quality	100	DTR
A08_idba_105	53399	No	NA	44	1	9	High-quality	High-quality	100	HMM-based
A08_idba_110	51187	No	NA	92	16	1	Complete	High-quality	100	DTR
A08_idba_112	49741	No	NA	57	23	1	Complete	High-quality	100	DTR
A08_idba_115	48778	No	NA	39	9	0	Medium-quality	Genome-fragment	51.86	AAI-based
A08_idba_116	48683	No	NA	43	3	22	High-quality	High-quality	100	AAI-based
A08_idba_119	48413	No	NA	62	20	1	Medium-quality	Genome-fragment	89.9	AAI-based
A08_idba_122	46989	No	NA	76	28	3	Medium-quality	Genome-fragment	67.55	HMM-based
A08_idba_135	43938	No	NA	61	14	0	High-quality	High-quality	95.04	AAI-based
A08_idba_137	43859	No	NA	60	26	2	Medium-quality	Genome-fragment	79.52	AAI-based
A08_idba_138	43852	No	NA	65	27	0	Medium-quality	Genome-fragment	75.8	AAI-based
A08_idba_141	42980	No	NA	55	16	0	Complete	High-quality	100	DTR
A08_idba_142	42933	No	NA	25	6	0	Low-quality	Genome-fragment	41.29	AAI-based
A08_idba_143	42802	No	NA	82	16	0	High-quality	High-quality	100	AAI-based
A08_idba_145	42358	No	NA	65	18	1	High-quality	High-quality	94.37	AAI-based
A08_idba_146	42321	No	NA	62	10	3	Medium-quality	Genome-fragment	55.27	AAI-based
A08_idba_148	42032	No	NA	71	10	0	Complete	High-quality	100	DTR
A08_idba_149	41517	No	NA	54	6	1	Low-quality	Genome-fragment	41.19	AAI-based
A08_idba_152	40244	No	NA	62	21	2	Complete	High-quality	100	DTR
A08_idba_155	39993	No	NA	50	28	1	Complete	High-quality	100	DTR
A08_idba_157	39624	No	NA	55	10	0	Complete	High-quality	100	DTR
A08_idba_158	39577	No	NA	59	20	0	Complete	High-quality	100	DTR
A08_idba_160	39459	No	NA	65	19	1	Complete	High-quality	100	DTR
A08_idba_161	39176	No	NA	40	4	6	Low-quality	Genome-fragment	42.67	HMM-based
A08_idba_162	39107	No	NA	57	11	0	Complete	High-quality	100	DTR
A08_idba_163	39021	No	NA	58	17	1	Complete	High-quality	100	DTR
A08_idba_165	38802	No	NA	51	17	0	Complete	High-quality	100	DTR
A08_idba_169	38394	No	NA	59	11	2	Medium-quality	Genome-fragment	62.29	HMM-based
A08_idba_172	38067	No	NA	65	13	3	High-quality	High-quality	99.24	AAI-based
A08_idba_173	37956	No	NA	54	19	0	High-quality	High-quality	91.08	AAI-based
A08_idba_177	37513	No	NA	48	23	2	High-quality	High-quality	100	AAI-based
A08_idba_178	37454	No	NA	56	22	0	Medium-quality	Genome-fragment	79.94	AAI-based
A08_idba_179	37356	No	NA	67	6	3	Medium-quality	Genome-fragment	57.37	AAI-based
A08_idba_181	37269	No	NA	50	11	0	Complete	High-quality	100	DTR
A08_idba_184	36443	No	NA	42	2	1	Low-quality	Genome-fragment	38.73	AAI-based
A08_idba_187	36247	No	NA	49	18	1	Complete	High-quality	100	DTR
A08_idba_191	35719	No	NA	52	13	0	Medium-quality	Genome-fragment	79.13	AAI-based
A08_idba_193	35664	No	NA	59	20	0	Complete	High-quality	100	DTR
A08_idba_194	35583	No	NA	61	21	1	High-quality	High-quality	94.45	AAI-based
A08_idba_195	35415	No	NA	34	1	18	Low-quality	Genome-fragment	12.69	HMM-based
A08_idba_196	35413	No	NA	43	7	1	Medium-quality	Genome-fragment	78.25	AAI-based
A08_idba_200	35074	Yes	14401	44	5	10	Low-quality	Genome-fragment	19.57	HMM-based
A08_idba_203	34899	No	NA	27	0	23	Not-determined	Genome-fragment	NA	NA
A08_idba_206	34408	No	NA	45	9	1	Medium-quality	Genome-fragment	71.16	AAI-based
A08_idba_207	34288	No	NA	54	18	0	High-quality	High-quality	96.77	AAI-based
A08_idba_210	33929	No	NA	49	18	0	High-quality	High-quality	97.9	AAI-based
A08_idba_213	33778	No	NA	46	24	0	Low-quality	Genome-fragment	29.66	AAI-based
A08_idba_215	33450	No	NA	43	8	2	Medium-quality	Genome-fragment	52.81	AAI-based
A08_idba_217	33375	No	NA	56	18	1	Medium-quality	Genome-fragment	79.98	AAI-based
A08_idba_218	33374	Yes	25558	64	3	6	Low-quality	Genome-fragment	25.2	AAI-based
A08_idba_219	33319	No	NA	51	17	1	Medium-quality	Genome-fragment	84.33	AAI-based
A08_idba_220	33308	No	NA	57	16	0	High-quality	High-quality	93.64	AAI-based
A08_idba_221	33205	No	NA	26	0	19	Not-determined	Genome-fragment	NA	NA
A08_idba_222	32991	No	NA	46	14	0	Medium-quality	Genome-fragment	58.25	HMM-based
A08_idba_226	32742	No	NA	49	13	4	Medium-quality	Genome-fragment	87.89	AAI-based
A08_idba_229	32207	No	NA	61	9	1	Low-quality	Genome-fragment	41.67	AAI-based
A08_idba_235	31521	No	NA	21	0	15	Not-determined	Genome-fragment	NA	NA
A08_idba_237	31104	No	NA	34	7	0	Low-quality	Genome-fragment	29.06	AAI-based
A08_idba_241	30681	No	NA	24	0	20	Not-determined	Genome-fragment	NA	NA
A08_idba_245	29680	No	NA	34	2	1	Low-quality	Genome-fragment	45.38	AAI-based
A08_idba_247	29011	No	NA	20	0	16	Not-determined	Genome-fragment	NA	NA
A08_idba_249	28925	No	NA	40	12	0	Medium-quality	Genome-fragment	69.56	AAI-based
A08_idba_252	28787	No	NA	41	15	0	Complete	High-quality	100	DTR
A08_idba_255	28432	No	NA	36	21	0	Medium-quality	Genome-fragment	82.6	AAI-based
A08_idba_256	28253	No	NA	40	14	0	Medium-quality	Genome-fragment	67.68	AAI-based
A08_idba_262	28046	No	NA	42	16	0	Complete	High-quality	100	DTR
A08_idba_263	27966	No	NA	28	0	6	Not-determined	Genome-fragment	NA	NA
A08_idba_265	27804	No	NA	27	0	20	Not-determined	Genome-fragment	NA	NA
A08_idba_279	26377	No	NA	20	0	16	Low-quality	Genome-fragment	11.35	AAI-based
A08_idba_280	26251	No	NA	34	16	0	Medium-quality	Genome-fragment	73.94	AAI-based
A08_idba_281	26045	No	NA	22	1	11	Low-quality	Genome-fragment	38.96	HMM-based
A08_idba_289	25266	No	NA	36	20	0	Medium-quality	Genome-fragment	71.49	AAI-based
A08_idba_305	24402	No	NA	31	11	0	Medium-quality	Genome-fragment	67.8	AAI-based
A08_idba_310	24169	No	NA	18	3	0	Low-quality	Genome-fragment	26.44	AAI-based
A08_idba_321	23507	No	NA	15	0	9	Not-determined	Genome-fragment	NA	NA
A08_idba_324	23417	No	NA	36	6	2	Medium-quality	Genome-fragment	67.24	AAI-based
A08_idba_325	23399	No	NA	33	18	0	Medium-quality	Genome-fragment	66.04	AAI-based
A08_idba_327	23291	No	NA	27	5	1	Low-quality	Genome-fragment	26.83	AAI-based
A08_idba_329	23248	No	NA	22	1	7	Low-quality	Genome-fragment	21.83	AAI-based
A08_idba_330	23031	No	NA	35	11	1	Medium-quality	Genome-fragment	61.26	AAI-based
A08_idba_336	22728	No	NA	30	4	1	Low-quality	Genome-fragment	22.69	AAI-based
A08_idba_337	22703	No	NA	6	0	0	Low-quality	Genome-fragment	22.72	AAI-based
A08_idba_338	22523	No	NA	27	22	0	Low-quality	Genome-fragment	49.74	AAI-based
A08_idba_340	22428	No	NA	27	1	0	Low-quality	Genome-fragment	24.53	AAI-based
A08_idba_341	22379	No	NA	19	0	11	Not-determined	Genome-fragment	NA	NA
A08_idba_345	22225	No	NA	20	0	4	Not-determined	Genome-fragment	NA	NA
A08_idba_346	22197	No	NA	27	11	0	Low-quality	Genome-fragment	49.78	AAI-based
A08_idba_348	22017	No	NA	36	13	0	Low-quality	Genome-fragment	36.8	AAI-based
A08_idba_351	21690	No	NA	27	3	1	Low-quality	Genome-fragment	48.22	AAI-based
A08_idba_360	21103	No	NA	22	4	0	Low-quality	Genome-fragment	37.69	AAI-based
A08_idba_364	20819	No	NA	17	0	9	Not-determined	Genome-fragment	NA	NA
A08_idba_370	20568	No	NA	30	9	0	Medium-quality	Genome-fragment	51.49	AAI-based
A08_idba_372	20446	No	NA	28	1	3	Low-quality	Genome-fragment	13.74	HMM-based
A08_idba_373	20407	No	NA	30	3	0	Medium-quality	Genome-fragment	54.01	AAI-based
A08_idba_377	20218	No	NA	25	20	0	Medium-quality	Genome-fragment	53.68	AAI-based
A08_idba_384	20062	No	NA	37	13	0	Medium-quality	Genome-fragment	54.99	AAI-based
A08_idba_385	19902	No	NA	30	0	29	Not-determined	Genome-fragment	NA	NA
A08_idba_399	18842	No	NA	14	0	10	Not-determined	Genome-fragment	NA	NA
A08_idba_404	18588	No	NA	19	3	0	Low-quality	Genome-fragment	10.12	AAI-based
A08_idba_407	18395	No	NA	21	7	0	Low-quality	Genome-fragment	38.66	AAI-based
A08_idba_411	18068	No	NA	23	16	0	Low-quality	Genome-fragment	42.84	AAI-based
A08_idba_412	17996	No	NA	18	0	3	Not-determined	Genome-fragment	NA	NA
A08_idba_415	17779	No	NA	16	0	6	Not-determined	Genome-fragment	NA	NA
A08_idba_418	17736	No	NA	19	4	0	Low-quality	Genome-fragment	25.13	AAI-based
A08_idba_420	17686	No	NA	5	0	0	Low-quality	Genome-fragment	12.82	AAI-based
A08_idba_424	17634	No	NA	26	1	1	Low-quality	Genome-fragment	16.11	AAI-based
A08_idba_425	17602	No	NA	19	13	0	Low-quality	Genome-fragment	29.38	AAI-based
A08_idba_428	17485	No	NA	34	3	0	Low-quality	Genome-fragment	44.62	AAI-based
A08_idba_429	17383	No	NA	23	2	0	Low-quality	Genome-fragment	27.49	AAI-based
A08_idba_436	17232	No	NA	22	11	0	Low-quality	Genome-fragment	47.63	AAI-based
A08_idba_440	17075	Yes	10094	17	3	4	Low-quality	Genome-fragment	24.84	AAI-based
A08_idba_444	16897	No	NA	14	0	7	Low-quality	Genome-fragment	8.46	AAI-based
A08_idba_455	16547	No	NA	21	1	6	Low-quality	Genome-fragment	15.54	AAI-based
A08_idba_459	16396	No	NA	22	6	0	Medium-quality	Genome-fragment	73.97	AAI-based
A08_idba_461	16290	Yes	2754	22	2	6	Low-quality	Genome-fragment	5.95	AAI-based
A08_idba_463	16174	No	NA	22	9	0	Low-quality	Genome-fragment	39.61	AAI-based
A08_idba_464	16120	No	NA	28	7	0	Low-quality	Genome-fragment	27.91	AAI-based
A08_idba_467	16054	No	NA	7	1	0	Low-quality	Genome-fragment	25.39	AAI-based
A08_idba_473	15895	No	NA	23	14	0	Low-quality	Genome-fragment	44.54	AAI-based
A08_idba_474	15863	No	NA	12	0	8	Not-determined	Genome-fragment	NA	NA
A08_idba_476	15857	No	NA	31	8	0	Low-quality	Genome-fragment	37.8	AAI-based
A08_idba_478	15736	No	NA	22	7	0	Medium-quality	Genome-fragment	52	HMM-based
A08_idba_489	15434	No	NA	21	1	1	Low-quality	Genome-fragment	34.36	AAI-based
A08_idba_491	15208	No	NA	7	0	6	Low-quality	Genome-fragment	7.83	AAI-based
A08_idba_492	15192	No	NA	20	4	0	Low-quality	Genome-fragment	45.48	HMM-based
A08_idba_493	15182	No	NA	22	0	5	Not-determined	Genome-fragment	NA	NA
A08_idba_495	15101	No	NA	15	0	15	Not-determined	Genome-fragment	NA	NA
A08_idba_497	15000	No	NA	5	2	0	Low-quality	Genome-fragment	10.79	AAI-based
A08_idba_498	14990	No	NA	22	8	0	Low-quality	Genome-fragment	43.9	AAI-based
A08_idba_499	14974	No	NA	14	4	1	Low-quality	Genome-fragment	39.63	AAI-based
A08_idba_503	14921	No	NA	14	0	2	Not-determined	Genome-fragment	NA	NA
A08_idba_506	14878	No	NA	7	0	2	Low-quality	Genome-fragment	18.5	AAI-based
A08_idba_509	14759	No	NA	18	15	0	Low-quality	Genome-fragment	43.64	AAI-based
A08_idba_510	14751	No	NA	17	0	5	Not-determined	Genome-fragment	NA	NA
A08_idba_511	14725	No	NA	9	0	3	Not-determined	Genome-fragment	NA	NA
A08_idba_513	14623	No	NA	24	10	0	Low-quality	Genome-fragment	29.63	AAI-based
A08_idba_514	14578	No	NA	15	0	8	Not-determined	Genome-fragment	NA	NA
A08_idba_527	14146	No	NA	17	6	0	Medium-quality	Genome-fragment	71.55	AAI-based
A08_idba_532	14061	Yes	9381	21	3	5	Low-quality	Genome-fragment	19.08	HMM-based
A08_idba_535	14031	No	NA	19	0	0	Not-determined	Genome-fragment	NA	NA
A08_idba_541	13648	No	NA	17	0	3	Low-quality	Genome-fragment	26.27	AAI-based
A08_idba_544	13471	No	NA	16	3	0	Complete	High-quality	100	ITR
A08_idba_550	13290	No	NA	11	0	4	Not-determined	Genome-fragment	NA	NA
A08_idba_554	13200	No	NA	19	1	0	Low-quality	Genome-fragment	8.75	AAI-based
A08_idba_559	13060	No	NA	11	0	9	Not-determined	Genome-fragment	NA	NA
A08_idba_560	13024	No	NA	14	0	10	Not-determined	Genome-fragment	NA	NA
A08_idba_561	13008	No	NA	20	14	0	Low-quality	Genome-fragment	27.39	AAI-based
A08_idba_564	12927	Yes	2252	8	2	2	Low-quality	Genome-fragment	3.02	HMM-based
A08_idba_570	12822	No	NA	12	0	5	Not-determined	Genome-fragment	NA	NA
A08_idba_572	12796	No	NA	24	15	0	Low-quality	Genome-fragment	31.8	AAI-based
A08_idba_574	12739	No	NA	30	2	0	Low-quality	Genome-fragment	11.19	AAI-based
A08_idba_578	12564	No	NA	10	0	2	Not-determined	Genome-fragment	NA	NA
A08_idba_579	12555	No	NA	22	1	0	Low-quality	Genome-fragment	44.63	AAI-based
A08_idba_583	12421	No	NA	20	11	1	Low-quality	Genome-fragment	36.47	AAI-based
A08_idba_593	12161	No	NA	12	0	11	Not-determined	Genome-fragment	NA	NA
A08_idba_598	12094	No	NA	14	2	0	Low-quality	Genome-fragment	30.75	AAI-based
A08_idba_599	12054	No	NA	16	5	1	Low-quality	Genome-fragment	24.06	AAI-based
A08_idba_601	11988	No	NA	14	0	9	Not-determined	Genome-fragment	NA	NA
A08_idba_603	11940	No	NA	22	0	1	Not-determined	Genome-fragment	NA	NA
A08_idba_604	11930	No	NA	28	6	0	Low-quality	Genome-fragment	20.63	AAI-based
A08_idba_607	11811	No	NA	24	0	23	Not-determined	Genome-fragment	NA	NA
A08_idba_609	11777	No	NA	15	9	0	Low-quality	Genome-fragment	34.19	AAI-based
A08_idba_616	11698	No	NA	28	8	0	Low-quality	Genome-fragment	21.85	AAI-based
A08_idba_622	11584	No	NA	23	2	0	Low-quality	Genome-fragment	27.76	AAI-based
A08_idba_627	11451	No	NA	6	1	0	Low-quality	Genome-fragment	11.69	AAI-based
A08_idba_628	11451	No	NA	9	0	9	Not-determined	Genome-fragment	NA	NA
A08_idba_635	11317	No	NA	28	5	1	Low-quality	Genome-fragment	26.32	AAI-based
A08_idba_636	11310	No	NA	23	5	0	Low-quality	Genome-fragment	26.3	AAI-based
A08_idba_648	11142	No	NA	30	5	1	Low-quality	Genome-fragment	32.4	AAI-based
A08_idba_651	11109	No	NA	23	0	22	Not-determined	Genome-fragment	NA	NA
A08_idba_652	11083	No	NA	17	8	0	Low-quality	Genome-fragment	28.13	AAI-based
A08_idba_655	11059	No	NA	15	3	1	Low-quality	Genome-fragment	26.24	AAI-based
A08_idba_656	11058	No	NA	7	0	5	Not-determined	Genome-fragment	NA	NA
A08_idba_657	11036	No	NA	8	0	7	Not-determined	Genome-fragment	NA	NA
A08_idba_662	10886	No	NA	19	6	0	Low-quality	Genome-fragment	26.27	AAI-based
A08_idba_663	10885	No	NA	20	2	0	Low-quality	Genome-fragment	22.29	HMM-based
A08_idba_665	10844	No	NA	18	2	0	Low-quality	Genome-fragment	29.63	AAI-based
A08_idba_668	10742	No	NA	14	3	0	Low-quality	Genome-fragment	26.3	AAI-based
A08_idba_669	10690	No	NA	9	0	6	Not-determined	Genome-fragment	NA	NA
A08_idba_671	10658	No	NA	14	0	6	Low-quality	Genome-fragment	8.87	AAI-based
A08_idba_674	10561	No	NA	13	8	0	Low-quality	Genome-fragment	27.97	AAI-based
A08_idba_676	10502	No	NA	12	0	11	Not-determined	Genome-fragment	NA	NA
A08_idba_684	10358	No	NA	19	2	0	Low-quality	Genome-fragment	5.64	AAI-based
A08_idba_686	10354	No	NA	9	2	0	Low-quality	Genome-fragment	25.86	AAI-based
A08_idba_688	10329	No	NA	26	0	1	Low-quality	Genome-fragment	5.64	AAI-based
A08_idba_689	10307	No	NA	12	1	0	Low-quality	Genome-fragment	11.18	AAI-based
A08_idba_690	10279	Yes	7436	12	3	2	Low-quality	Genome-fragment	12.67	AAI-based
A08_idba_691	10245	No	NA	12	0	9	Not-determined	Genome-fragment	NA	NA
A08_idba_694	10150	No	NA	8	0	2	Not-determined	Genome-fragment	NA	NA
A08_idba_701	9995	No	NA	11	9	0	Low-quality	Genome-fragment	19.33	AAI-based
A08_idba_703	9969	No	NA	8	1	0	Low-quality	Genome-fragment	10.28	AAI-based
A08_idba_709	9892	No	NA	2	0	0	Low-quality	Genome-fragment	9.6	AAI-based
A08_idba_710	9873	No	NA	20	3	0	Low-quality	Genome-fragment	12.24	AAI-based
A08_idba_711	9864	No	NA	8	0	1	Low-quality	Genome-fragment	21.22	AAI-based
A08_idba_712	9830	No	NA	14	5	0	Low-quality	Genome-fragment	23.92	AAI-based
A08_idba_713	9812	No	NA	20	2	2	Low-quality	Genome-fragment	6.49	AAI-based
A08_idba_720	9689	No	NA	14	4	0	Low-quality	Genome-fragment	24.85	AAI-based
A08_idba_723	9652	No	NA	6	0	5	Not-determined	Genome-fragment	NA	NA
A08_idba_726	9616	No	NA	18	5	0	Low-quality	Genome-fragment	28.47	AAI-based
A08_idba_727	9562	No	NA	13	0	11	Not-determined	Genome-fragment	NA	NA
A08_idba_732	9453	No	NA	17	2	0	Low-quality	Genome-fragment	26.42	AAI-based
A08_idba_734	9439	No	NA	5	0	0	Low-quality	Genome-fragment	10.3	AAI-based
A08_idba_737	9404	No	NA	13	6	0	Low-quality	Genome-fragment	23.54	AAI-based
A08_idba_738	9389	No	NA	24	2	0	Low-quality	Genome-fragment	9.37	AAI-based
A08_idba_744	9207	No	NA	13	1	3	Not-determined	Genome-fragment	NA	NA
A08_idba_748	9149	No	NA	10	1	0	Low-quality	Genome-fragment	16.36	AAI-based
A08_idba_749	9138	No	NA	15	1	0	Low-quality	Genome-fragment	11.05	AAI-based
A08_idba_755	9006	No	NA	16	1	0	Low-quality	Genome-fragment	18.62	AAI-based
A08_idba_758	8970	No	NA	8	1	0	Low-quality	Genome-fragment	8.96	AAI-based
A08_idba_759	8968	No	NA	18	2	0	Low-quality	Genome-fragment	15.37	AAI-based
A08_idba_766	8877	No	NA	10	0	6	Not-determined	Genome-fragment	NA	NA
A08_idba_767	8858	No	NA	14	2	1	Low-quality	Genome-fragment	11.52	AAI-based
A08_idba_768	8857	No	NA	7	0	2	Not-determined	Genome-fragment	NA	NA
A08_idba_775	8770	Yes	6318	10	2	2	Low-quality	Genome-fragment	9.8	AAI-based
A08_idba_776	8770	No	NA	8	0	1	Not-determined	Genome-fragment	NA	NA
A08_idba_777	8752	No	NA	13	6	0	Low-quality	Genome-fragment	24.03	AAI-based
A08_idba_778	8732	No	NA	11	0	0	Low-quality	Genome-fragment	13.81	AAI-based
A08_idba_779	8732	No	NA	17	2	0	Low-quality	Genome-fragment	19.52	AAI-based
A08_idba_783	8659	No	NA	12	2	0	Low-quality	Genome-fragment	20.96	AAI-based
A08_idba_796	8526	No	NA	7	0	3	Not-determined	Genome-fragment	NA	NA
A08_idba_797	8519	No	NA	14	3	0	Low-quality	Genome-fragment	18.67	AAI-based
A08_idba_805	8399	No	NA	10	5	0	Low-quality	Genome-fragment	19.15	AAI-based
A08_idba_808	8345	No	NA	7	0	6	Low-quality	Genome-fragment	2.73	AAI-based
A08_idba_809	8335	No	NA	7	0	7	Not-determined	Genome-fragment	NA	NA
A08_idba_815	8176	No	NA	4	0	2	Not-determined	Genome-fragment	NA	NA
A08_idba_816	8175	No	NA	12	6	0	Low-quality	Genome-fragment	23.45	AAI-based
A08_idba_821	8126	No	NA	14	3	0	Low-quality	Genome-fragment	21.42	AAI-based
A08_idba_822	8104	No	NA	16	2	1	Low-quality	Genome-fragment	19.32	AAI-based
A08_idba_825	8084	No	NA	9	6	0	Low-quality	Genome-fragment	13.53	AAI-based
A08_idba_830	8031	No	NA	4	0	1	Not-determined	Genome-fragment	NA	NA
A08_idba_839	7924	No	NA	8	0	5	Not-determined	Genome-fragment	NA	NA
A08_idba_841	7903	No	NA	14	2	0	Low-quality	Genome-fragment	7.75	AAI-based
A08_idba_846	7848	No	NA	13	8	0	Low-quality	Genome-fragment	18.09	AAI-based
A08_idba_848	7839	No	NA	11	4	0	Low-quality	Genome-fragment	18.58	AAI-based
A08_idba_850	7816	No	NA	8	5	0	Low-quality	Genome-fragment	18.73	AAI-based
A08_idba_858	7712	No	NA	17	5	0	Low-quality	Genome-fragment	17.36	AAI-based
A08_idba_861	7680	No	NA	5	0	3	Low-quality	Genome-fragment	18.27	AAI-based
A08_idba_862	7680	No	NA	7	2	0	Low-quality	Genome-fragment	7.23	AAI-based
A08_idba_863	7672	No	NA	3	0	3	Not-determined	Genome-fragment	NA	NA
A08_idba_865	7633	No	NA	6	4	0	Low-quality	Genome-fragment	13.44	AAI-based
A08_idba_868	7587	No	NA	4	4	0	Low-quality	Genome-fragment	19.96	AAI-based
A08_idba_871	7572	No	NA	17	5	0	Low-quality	Genome-fragment	11.56	HMM-based
A08_idba_878	7457	No	NA	10	4	0	Low-quality	Genome-fragment	16.44	AAI-based
A08_idba_880	7426	No	NA	7	0	6	Not-determined	Genome-fragment	NA	NA
A08_idba_884	7380	No	NA	14	4	0	Low-quality	Genome-fragment	21.61	AAI-based
A08_idba_886	7367	No	NA	14	5	0	Low-quality	Genome-fragment	19.9	AAI-based
A08_idba_887	7358	No	NA	16	11	0	Low-quality	Genome-fragment	15.71	AAI-based
A08_idba_890	7353	No	NA	3	0	0	Low-quality	Genome-fragment	5.57	AAI-based
A08_idba_893	7317	No	NA	21	3	0	Low-quality	Genome-fragment	14.95	AAI-based
A08_idba_898	7244	No	NA	14	0	0	Low-quality	Genome-fragment	20.09	AAI-based
A08_idba_901	7208	No	NA	9	1	0	Low-quality	Genome-fragment	12.38	AAI-based
A08_idba_903	7180	No	NA	8	0	1	Low-quality	Genome-fragment	12.83	AAI-based
A08_idba_917	7046	No	NA	6	0	1	Not-determined	Genome-fragment	NA	NA
A08_idba_922	6995	No	NA	9	1	0	Low-quality	Genome-fragment	6.86	AAI-based
A08_idba_924	6991	No	NA	6	0	6	Not-determined	Genome-fragment	NA	NA
A08_idba_925	6984	No	NA	17	2	0	Low-quality	Genome-fragment	11.04	AAI-based
A08_idba_930	6941	No	NA	7	2	0	Low-quality	Genome-fragment	8	AAI-based
A08_idba_940	6832	No	NA	7	4	0	Low-quality	Genome-fragment	19.58	AAI-based
A08_idba_943	6821	No	NA	18	0	1	Low-quality	Genome-fragment	4.45	AAI-based
A08_idba_944	6816	Yes	4186	9	1	3	Low-quality	Genome-fragment	6.99	AAI-based
A08_idba_945	6796	No	NA	2	0	2	Low-quality	Genome-fragment	3.45	AAI-based
A08_idba_946	6771	No	NA	11	0	2	Not-determined	Genome-fragment	NA	NA
A08_idba_951	6704	No	NA	7	0	0	Low-quality	Genome-fragment	4.43	AAI-based
A08_idba_952	6702	No	NA	4	0	0	Low-quality	Genome-fragment	6.26	AAI-based
A08_idba_954	6692	No	NA	16	4	0	Low-quality	Genome-fragment	15.01	AAI-based
A08_idba_955	6669	No	NA	6	0	5	Not-determined	Genome-fragment	NA	NA
A08_idba_956	6663	No	NA	11	4	0	Low-quality	Genome-fragment	17.91	AAI-based
A08_idba_957	6633	No	NA	12	0	0	Not-determined	Genome-fragment	NA	NA
A08_idba_959	6603	No	NA	11	0	4	Not-determined	Genome-fragment	NA	NA
A08_idba_963	6559	No	NA	7	2	0	Low-quality	Genome-fragment	7.04	AAI-based
A08_idba_964	6547	No	NA	9	2	0	Low-quality	Genome-fragment	17.05	AAI-based
A08_idba_965	6538	No	NA	5	3	0	Low-quality	Genome-fragment	18.93	AAI-based
A08_idba_969	6494	No	NA	9	9	0	Low-quality	Genome-fragment	16.48	AAI-based
A08_idba_970	6475	No	NA	7	2	0	Low-quality	Genome-fragment	6.19	AAI-based
A08_idba_972	6444	No	NA	8	4	0	Low-quality	Genome-fragment	18.13	AAI-based
A08_idba_976	6420	No	NA	6	1	0	Low-quality	Genome-fragment	13.11	AAI-based
A08_idba_986	6334	Yes	4596	8	3	1	Low-quality	Genome-fragment	8.21	AAI-based
A08_idba_988	6327	No	NA	9	3	0	Low-quality	Genome-fragment	13.35	AAI-based
A08_idba_991	6303	No	NA	4	0	0	Low-quality	Genome-fragment	15.35	AAI-based
A08_idba_993	6282	No	NA	9	1	0	Low-quality	Genome-fragment	4.31	AAI-based
A08_idba_995	6256	No	NA	6	3	0	Low-quality	Genome-fragment	5.99	AAI-based
A08_idba_996	6255	No	NA	9	8	0	Low-quality	Genome-fragment	20.83	AAI-based
A08_idba_999	6235	No	NA	6	0	2	Not-determined	Genome-fragment	NA	NA
A08_idba_1008	6163	No	NA	4	0	3	Not-determined	Genome-fragment	NA	NA
A08_idba_1012	6151	No	NA	7	0	3	Not-determined	Genome-fragment	NA	NA
A08_idba_1013	6134	No	NA	9	4	0	Low-quality	Genome-fragment	10.99	AAI-based
A08_idba_1014	6129	No	NA	3	0	3	Not-determined	Genome-fragment	NA	NA
A08_idba_1021	6058	No	NA	8	1	0	Low-quality	Genome-fragment	13.41	AAI-based
A08_idba_1030	6021	No	NA	6	4	0	Complete	High-quality	100	DTR
A08_idba_1033	5992	No	NA	12	1	0	Low-quality	Genome-fragment	13.57	AAI-based
A08_idba_1035	5971	No	NA	9	7	0	Low-quality	Genome-fragment	13.87	AAI-based
A08_idba_1036	5948	No	NA	10	2	0	Low-quality	Genome-fragment	8.75	AAI-based
A08_idba_1037	5945	No	NA	9	0	0	Not-determined	Genome-fragment	NA	NA
A08_idba_1038	5935	No	NA	1	0	1	Not-determined	Genome-fragment	NA	NA
A08_idba_1044	5900	No	NA	15	2	1	Low-quality	Genome-fragment	13.62	AAI-based
A08_idba_1046	5883	No	NA	8	2	0	Low-quality	Genome-fragment	6.81	AAI-based
A08_idba_1048	5856	No	NA	9	0	2	Not-determined	Genome-fragment	NA	NA
A08_idba_1049	5847	No	NA	11	0	0	Low-quality	Genome-fragment	9.39	AAI-based
A08_idba_1051	5828	No	NA	9	1	0	Low-quality	Genome-fragment	10.41	AAI-based
A08_idba_1055	5800	No	NA	11	0	1	Not-determined	Genome-fragment	NA	NA
A08_idba_1056	5795	No	NA	6	0	6	Low-quality	Genome-fragment	0.52	AAI-based
A08_idba_1057	5792	No	NA	5	0	5	Not-determined	Genome-fragment	NA	NA
A08_idba_1059	5777	No	NA	10	1	0	Low-quality	Genome-fragment	16.48	AAI-based
A08_idba_1060	5763	No	NA	10	0	0	Low-quality	Genome-fragment	9.63	AAI-based
A08_idba_1063	5737	No	NA	1	0	0	Low-quality	Genome-fragment	4.15	AAI-based
A08_idba_1064	5734	No	NA	5	1	0	Low-quality	Genome-fragment	11.86	AAI-based
A08_idba_1065	5731	No	NA	9	0	3	Not-determined	Genome-fragment	NA	NA
A08_idba_1069	5703	No	NA	13	0	0	Low-quality	Genome-fragment	6.61	AAI-based
A08_idba_1071	5667	No	NA	11	0	1	Low-quality	Genome-fragment	9.47	AAI-based
A08_idba_1072	5658	No	NA	15	0	0	Low-quality	Genome-fragment	13.33	AAI-based
A08_idba_1073	5654	No	NA	5	1	0	Low-quality	Genome-fragment	5.1	AAI-based
A08_idba_1076	5631	No	NA	1	1	0	Low-quality	Genome-fragment	5.99	HMM-based
A08_idba_1079	5597	No	NA	7	5	0	Low-quality	Genome-fragment	9.34	AAI-based
A08_idba_1080	5596	No	NA	1	0	1	Not-determined	Genome-fragment	NA	NA
A08_idba_1081	5582	Yes	3778	5	1	1	Low-quality	Genome-fragment	7.14	AAI-based
A08_idba_1083	5576	No	NA	2	1	0	Low-quality	Genome-fragment	6.35	AAI-based
A08_idba_1085	5562	No	NA	6	4	0	Low-quality	Genome-fragment	12.6	AAI-based
A08_idba_1092	5479	No	NA	11	1	1	Low-quality	Genome-fragment	16.05	AAI-based
A08_idba_1093	5472	No	NA	12	2	0	Low-quality	Genome-fragment	7.73	AAI-based
A08_idba_1094	5461	No	NA	8	0	0	Low-quality	Genome-fragment	6.33	AAI-based
A08_idba_1095	5457	No	NA	1	0	1	Not-determined	Genome-fragment	NA	NA
A08_idba_1099	5442	No	NA	10	0	0	Low-quality	Genome-fragment	5.79	AAI-based
A08_idba_1108	5381	No	NA	7	5	0	Low-quality	Genome-fragment	7.24	HMM-based
A08_idba_1112	5355	No	NA	4	1	0	Low-quality	Genome-fragment	11.88	AAI-based
A08_idba_1113	5340	No	NA	7	1	0	Low-quality	Genome-fragment	13.4	AAI-based
A08_idba_1119	5315	No	NA	4	0	2	Not-determined	Genome-fragment	NA	NA
A08_idba_1120	5312	No	NA	1	0	0	Low-quality	Genome-fragment	5.52	AAI-based
A08_idba_1125	5281	No	NA	4	0	4	Low-quality	Genome-fragment	1.92	AAI-based
A08_idba_1131	5247	No	NA	11	2	0	Low-quality	Genome-fragment	14.79	AAI-based
A08_idba_1133	5239	No	NA	7	0	1	Low-quality	Genome-fragment	6.98	AAI-based
A08_idba_1134	5238	No	NA	11	1	0	Low-quality	Genome-fragment	3.42	AAI-based
A08_idba_1137	5227	No	NA	6	1	0	Low-quality	Genome-fragment	12.26	AAI-based
A08_idba_1138	5219	No	NA	1	0	1	Not-determined	Genome-fragment	NA	NA
A08_idba_1139	5215	No	NA	10	1	0	Low-quality	Genome-fragment	10.88	AAI-based
A08_idba_1140	5206	No	NA	14	3	0	Low-quality	Genome-fragment	12.83	AAI-based
A08_idba_1143	5175	No	NA	4	0	1	Low-quality	Genome-fragment	5.97	AAI-based
A08_idba_1144	5174	No	NA	2	0	1	Not-determined	Genome-fragment	NA	NA
A08_idba_1158	5101	No	NA	1	0	1	Not-determined	Genome-fragment	NA	NA
A08_idba_1160	5081	No	NA	4	2	0	Low-quality	Genome-fragment	5	AAI-based
A08_idba_1163	5061	Yes	4116	9	4	1	Low-quality	Genome-fragment	2.65	AAI-based
A09_idba_5	222028	No	NA	209	0	133	Not-determined	Genome-fragment	NA	NA
A09_idba_7	204947	No	NA	183	8	106	High-quality	High-quality	100	HMM-based
A09_idba_15	143478	No	NA	133	0	101	Not-determined	Genome-fragment	NA	NA
A09_idba_17	130035	No	NA	115	3	23	High-quality	High-quality	100	AAI-based
A09_idba_22	115072	No	NA	148	28	2	Medium-quality	Genome-fragment	66	AAI-based
A09_idba_23	114790	No	NA	99	1	50	Low-quality	Genome-fragment	18.29	HMM-based
A09_idba_24	112716	No	NA	140	7	15	High-quality	High-quality	100	AAI-based
A09_idba_25	112305	Yes	43137	121	21	34	Medium-quality	Genome-fragment	86.13	AAI-based
A09_idba_26	109438	No	NA	94	2	9	Medium-quality	Genome-fragment	50.16	HMM-based
A09_idba_27	107840	Yes	11911	95	5	58	Low-quality	Genome-fragment	16.19	HMM-based
A09_idba_28	102190	No	NA	135	30	2	Medium-quality	Genome-fragment	76.79	AAI-based
A09_idba_37	89369	No	NA	101	19	1	High-quality	High-quality	90.86	AAI-based
A09_idba_38	89257	No	NA	140	17	2	High-quality	High-quality	100	AAI-based
A09_idba_39	83117	No	NA	113	6	6	Low-quality	Genome-fragment	20.73	AAI-based
A09_idba_40	82984	No	NA	111	7	0	Low-quality	Genome-fragment	20.7	AAI-based
A09_idba_42	82265	Yes	23758	82	20	36	Medium-quality	Genome-fragment	67.93	AAI-based
A09_idba_44	80576	No	NA	115	24	2	High-quality	High-quality	94.88	AAI-based
A09_idba_46	76818	No	NA	108	13	0	Complete	High-quality	100	DTR
A09_idba_48	75751	No	NA	117	19	3	Complete	High-quality	100	DTR
A09_idba_50	74929	No	NA	67	0	42	Not-determined	Genome-fragment	NA	NA
A09_idba_53	73967	No	NA	115	17	0	High-quality	High-quality	100	AAI-based
A09_idba_55	72182	Yes	29651	93	15	33	Medium-quality	Genome-fragment	83.5	AAI-based
A09_idba_56	70430	No	NA	112	9	1	Low-quality	Genome-fragment	17.57	AAI-based
A09_idba_59	66961	Yes	28472	79	17	15	Medium-quality	Genome-fragment	75.1	AAI-based
A09_idba_60	65845	No	NA	76	17	2	Medium-quality	Genome-fragment	66	AAI-based
A09_idba_64	61990	No	NA	50	5	1	Medium-quality	Genome-fragment	60.92	AAI-based
A09_idba_65	61791	No	NA	85	16	0	Complete	High-quality	100	DTR
A09_idba_68	60485	No	NA	53	6	3	High-quality	High-quality	92.59	AAI-based
A09_idba_69	60045	No	NA	100	23	3	Complete	High-quality	100	DTR
A09_idba_81	53423	No	NA	80	29	0	High-quality	High-quality	100	AAI-based
A09_idba_83	53269	No	NA	75	20	1	Complete	High-quality	100	DTR
A09_idba_86	52593	No	NA	99	18	0	Complete	High-quality	100	DTR
A09_idba_92	51167	No	NA	53	2	0	Low-quality	Genome-fragment	12.76	AAI-based
A09_idba_93	51142	No	NA	74	19	0	Complete	High-quality	100	DTR
A09_idba_95	50202	No	NA	60	4	0	Medium-quality	Genome-fragment	53.89	AAI-based
A09_idba_96	49482	No	NA	92	22	0	Complete	High-quality	100	DTR
A09_idba_97	48556	No	NA	40	15	2	Low-quality	Genome-fragment	27.96	AAI-based
A09_idba_100	47982	No	NA	82	19	1	Complete	High-quality	100	DTR
A09_idba_101	47912	No	NA	32	1	14	Medium-quality	Genome-fragment	59.3	HMM-based
A09_idba_105	46205	No	NA	72	12	1	High-quality	High-quality	100	AAI-based
A09_idba_109	44272	No	NA	68	14	0	Complete	High-quality	100	DTR
A09_idba_110	44136	No	NA	74	15	1	High-quality	High-quality	97.94	AAI-based
A09_idba_113	43921	No	NA	57	7	0	Complete	High-quality	100	DTR
A09_idba_116	43571	No	NA	56	4	6	High-quality	High-quality	94.47	AAI-based
A09_idba_119	43209	No	NA	81	17	1	Complete	High-quality	100	DTR
A09_idba_121	43096	No	NA	43	0	34	Not-determined	Genome-fragment	NA	NA
A09_idba_123	42790	No	NA	46	15	0	Complete	High-quality	100	DTR
A09_idba_124	42765	No	NA	56	13	0	High-quality	High-quality	99.01	AAI-based
A09_idba_125	42546	No	NA	60	9	0	Complete	High-quality	100	DTR
A09_idba_126	42378	No	NA	46	1	15	High-quality	High-quality	100	HMM-based
A09_idba_127	42370	No	NA	81	16	0	High-quality	High-quality	100	AAI-based
A09_idba_128	42327	No	NA	59	9	0	Complete	High-quality	100	DTR
A09_idba_129	41971	No	NA	65	16	0	High-quality	High-quality	100	AAI-based
A09_idba_133	40552	No	NA	51	1	10	Medium-quality	Genome-fragment	58.23	HMM-based
A09_idba_141	39570	No	NA	49	10	1	Complete	High-quality	100	DTR
A09_idba_147	38207	No	NA	32	0	26	Not-determined	Genome-fragment	NA	NA
A09_idba_150	37867	Yes	16593	42	10	10	Low-quality	Genome-fragment	43.2	AAI-based
A09_idba_152	37346	No	NA	58	17	0	High-quality	High-quality	100	AAI-based
A09_idba_153	37241	No	NA	60	8	0	Medium-quality	Genome-fragment	65.09	AAI-based
A09_idba_157	36794	No	NA	56	13	1	High-quality	High-quality	91.5	AAI-based
A09_idba_160	36443	No	NA	55	12	0	Medium-quality	Genome-fragment	63.1	AAI-based
A09_idba_162	36124	No	NA	43	16	0	Complete	High-quality	100	DTR
A09_idba_163	36104	No	NA	63	17	1	High-quality	High-quality	94.69	AAI-based
A09_idba_164	35739	No	NA	51	20	0	Complete	High-quality	100	DTR
A09_idba_166	35685	No	NA	39	3	0	High-quality	High-quality	93.86	AAI-based
A09_idba_171	35270	No	NA	38	0	15	Not-determined	Genome-fragment	NA	NA
A09_idba_173	35112	No	NA	45	7	0	Low-quality	Genome-fragment	34.86	AAI-based
A09_idba_178	34109	No	NA	48	14	0	Complete	High-quality	100	DTR
A09_idba_179	34087	No	NA	49	8	3	Medium-quality	Genome-fragment	80.93	AAI-based
A09_idba_182	33691	No	NA	56	16	0	High-quality	High-quality	100	AAI-based
A09_idba_185	33414	No	NA	46	18	0	Medium-quality	Genome-fragment	87.04	AAI-based
A09_idba_186	33360	No	NA	16	4	0	Low-quality	Genome-fragment	33.35	AAI-based
A09_idba_188	33209	No	NA	51	23	0	Medium-quality	Genome-fragment	88.32	AAI-based
A09_idba_199	32271	No	NA	51	16	0	High-quality	High-quality	100	AAI-based
A09_idba_205	31701	No	NA	51	8	0	Medium-quality	Genome-fragment	51.54	AAI-based
A09_idba_209	31200	No	NA	33	0	20	Low-quality	Genome-fragment	20.09	AAI-based
A09_idba_210	31190	No	NA	43	8	3	Medium-quality	Genome-fragment	58.39	AAI-based
A09_idba_218	30436	No	NA	40	4	1	Low-quality	Genome-fragment	7.59	AAI-based
A09_idba_223	29900	No	NA	50	14	0	Medium-quality	Genome-fragment	86.56	AAI-based
A09_idba_224	29883	No	NA	32	5	1	Low-quality	Genome-fragment	34.15	AAI-based
A09_idba_227	29705	No	NA	28	0	23	Not-determined	Genome-fragment	NA	NA
A09_idba_228	29610	No	NA	26	0	19	Not-determined	Genome-fragment	NA	NA
A09_idba_230	29467	No	NA	51	4	0	Medium-quality	Genome-fragment	52.29	AAI-based
A09_idba_232	29398	No	NA	50	5	0	Low-quality	Genome-fragment	43.33	AAI-based
A09_idba_233	29321	No	NA	28	0	23	Not-determined	Genome-fragment	NA	NA
A09_idba_235	29257	No	NA	30	0	28	Not-determined	Genome-fragment	NA	NA
A09_idba_240	28954	No	NA	32	3	0	Low-quality	Genome-fragment	17.75	AAI-based
A09_idba_242	28708	No	NA	25	0	18	Not-determined	Genome-fragment	NA	NA
A09_idba_246	28483	No	NA	26	19	0	Low-quality	Genome-fragment	43.62	AAI-based
A09_idba_248	28386	No	NA	27	0	23	Not-determined	Genome-fragment	NA	NA
A09_idba_253	27940	No	NA	40	0	39	Not-determined	Genome-fragment	NA	NA
A09_idba_257	27860	No	NA	16	3	0	Low-quality	Genome-fragment	41.07	AAI-based
A09_idba_266	27236	No	NA	28	0	20	Not-determined	Genome-fragment	NA	NA
A09_idba_271	27063	No	NA	27	0	5	Low-quality	Genome-fragment	32.97	AAI-based
A09_idba_273	26870	No	NA	33	13	0	Medium-quality	Genome-fragment	54.04	AAI-based
A09_idba_279	26406	No	NA	37	6	0	Low-quality	Genome-fragment	46.63	AAI-based
A09_idba_285	25928	No	NA	22	6	0	Low-quality	Genome-fragment	27.83	AAI-based
A09_idba_286	25923	No	NA	38	4	1	Low-quality	Genome-fragment	9.92	HMM-based
A09_idba_291	25596	No	NA	20	0	17	Not-determined	Genome-fragment	NA	NA
A09_idba_292	25481	No	NA	58	10	0	Low-quality	Genome-fragment	39.02	AAI-based
A09_idba_298	25269	No	NA	40	12	0	Medium-quality	Genome-fragment	62.01	AAI-based
A09_idba_306	24677	No	NA	31	7	1	Low-quality	Genome-fragment	42.09	AAI-based
A09_idba_309	24430	No	NA	22	0	16	Not-determined	Genome-fragment	NA	NA
A09_idba_310	24409	No	NA	24	0	18	Not-determined	Genome-fragment	NA	NA
A09_idba_312	24333	No	NA	23	0	9	Not-determined	Genome-fragment	NA	NA
A09_idba_314	24181	No	NA	24	16	0	Low-quality	Genome-fragment	39.82	AAI-based
A09_idba_316	23996	No	NA	21	0	16	Not-determined	Genome-fragment	NA	NA
A09_idba_318	23962	No	NA	22	0	8	Not-determined	Genome-fragment	NA	NA
A09_idba_323	23829	No	NA	26	0	3	Not-determined	Genome-fragment	NA	NA
A09_idba_327	23726	No	NA	26	15	0	Low-quality	Genome-fragment	48.58	AAI-based
A09_idba_329	23667	No	NA	26	6	0	Low-quality	Genome-fragment	42.82	AAI-based
A09_idba_330	23611	No	NA	33	13	0	Medium-quality	Genome-fragment	56.75	AAI-based
A09_idba_335	23335	No	NA	19	0	14	Not-determined	Genome-fragment	NA	NA
A09_idba_337	23242	No	NA	20	0	15	Low-quality	Genome-fragment	8.15	AAI-based
A09_idba_339	23169	No	NA	32	12	0	Medium-quality	Genome-fragment	64.73	AAI-based
A09_idba_340	23158	No	NA	22	0	14	Not-determined	Genome-fragment	NA	NA
A09_idba_342	23061	No	NA	28	0	9	Low-quality	Genome-fragment	38.52	AAI-based
A09_idba_343	22999	No	NA	32	20	0	Medium-quality	Genome-fragment	61.83	AAI-based
A09_idba_347	22580	No	NA	19	2	0	Medium-quality	Genome-fragment	57.7	AAI-based
A09_idba_349	22477	No	NA	21	1	12	Low-quality	Genome-fragment	6.11	AAI-based
A09_idba_355	22308	Yes	18743	39	8	3	Low-quality	Genome-fragment	47.11	AAI-based
A09_idba_356	22295	No	NA	41	8	0	Low-quality	Genome-fragment	34.07	AAI-based
A09_idba_358	22232	No	NA	36	14	0	Medium-quality	Genome-fragment	65.71	AAI-based
A09_idba_370	21464	No	NA	13	0	1	Low-quality	Genome-fragment	41.85	AAI-based
A09_idba_373	21234	No	NA	35	11	1	Medium-quality	Genome-fragment	52.91	AAI-based
A09_idba_374	21234	No	NA	29	17	1	Medium-quality	Genome-fragment	60.69	AAI-based
A09_idba_384	20895	No	NA	18	13	0	Low-quality	Genome-fragment	31.85	AAI-based
A09_idba_396	20282	No	NA	17	0	14	Not-determined	Genome-fragment	NA	NA
A09_idba_401	20176	No	NA	20	0	14	Not-determined	Genome-fragment	NA	NA
A09_idba_406	20027	No	NA	26	4	1	Low-quality	Genome-fragment	23.07	AAI-based
A09_idba_410	19848	No	NA	30	9	1	Medium-quality	Genome-fragment	54.06	AAI-based
A09_idba_412	19731	No	NA	24	2	3	Low-quality	Genome-fragment	13.97	HMM-based
A09_idba_414	19645	No	NA	23	12	1	Low-quality	Genome-fragment	14.78	AAI-based
A09_idba_415	19620	No	NA	41	11	1	Low-quality	Genome-fragment	34.32	AAI-based
A09_idba_417	19565	Yes	16886	30	3	2	Complete	High-quality	100	DTR
A09_idba_426	19350	No	NA	20	0	7	Low-quality	Genome-fragment	10.41	AAI-based
A09_idba_427	19350	No	NA	19	0	19	Not-determined	Genome-fragment	NA	NA
A09_idba_433	19099	No	NA	17	0	7	Low-quality	Genome-fragment	22.49	AAI-based
A09_idba_434	19096	No	NA	16	3	0	Low-quality	Genome-fragment	7.77	AAI-based
A09_idba_435	19061	No	NA	24	1	3	Low-quality	Genome-fragment	36.61	AAI-based
A09_idba_439	18955	No	NA	25	8	0	Low-quality	Genome-fragment	40.42	AAI-based
A09_idba_440	18927	No	NA	7	0	0	Low-quality	Genome-fragment	11.6	AAI-based
A09_idba_441	18916	No	NA	20	0	14	Not-determined	Genome-fragment	NA	NA
A09_idba_442	18804	No	NA	21	0	3	Not-determined	Genome-fragment	NA	NA
A09_idba_444	18784	No	NA	12	0	8	Not-determined	Genome-fragment	NA	NA
A09_idba_445	18770	No	NA	17	0	14	Not-determined	Genome-fragment	NA	NA
A09_idba_446	18756	No	NA	26	13	1	Medium-quality	Genome-fragment	52.88	AAI-based
A09_idba_448	18663	No	NA	15	0	15	Not-determined	Genome-fragment	NA	NA
A09_idba_450	18561	No	NA	22	0	5	Low-quality	Genome-fragment	19.72	AAI-based
A09_idba_459	18281	No	NA	20	7	1	Low-quality	Genome-fragment	40.88	AAI-based
A09_idba_460	18272	No	NA	35	6	0	Low-quality	Genome-fragment	46.66	AAI-based
A09_idba_461	18269	No	NA	24	12	0	Low-quality	Genome-fragment	38.95	AAI-based
A09_idba_462	18245	No	NA	17	0	11	Not-determined	Genome-fragment	NA	NA
A09_idba_472	17946	No	NA	23	13	0	Low-quality	Genome-fragment	45.07	AAI-based
A09_idba_477	17855	No	NA	14	1	2	Low-quality	Genome-fragment	21.26	HMM-based
A09_idba_478	17841	No	NA	18	5	0	Low-quality	Genome-fragment	30.27	AAI-based
A09_idba_479	17814	No	NA	26	1	7	Low-quality	Genome-fragment	17.37	AAI-based
A09_idba_480	17768	No	NA	16	1	14	Low-quality	Genome-fragment	8.74	AAI-based
A09_idba_482	17665	No	NA	11	0	8	Not-determined	Genome-fragment	NA	NA
A09_idba_486	17531	No	NA	40	5	0	Low-quality	Genome-fragment	42.54	AAI-based
A09_idba_495	17407	No	NA	19	0	9	Low-quality	Genome-fragment	19.51	AAI-based
A09_idba_498	17350	No	NA	15	0	9	Not-determined	Genome-fragment	NA	NA
A09_idba_500	17279	Yes	14556	16	4	5	Low-quality	Genome-fragment	21.73	HMM-based
A09_idba_501	17261	No	NA	29	7	1	Low-quality	Genome-fragment	29.83	AAI-based
A09_idba_505	17225	No	NA	33	1	1	Low-quality	Genome-fragment	46.04	AAI-based
A09_idba_506	17214	No	NA	17	2	0	Low-quality	Genome-fragment	4.29	AAI-based
A09_idba_509	17185	No	NA	21	11	0	Medium-quality	Genome-fragment	50.56	AAI-based
A09_idba_511	17058	No	NA	14	0	13	Not-determined	Genome-fragment	NA	NA
A09_idba_520	16930	No	NA	24	0	10	Not-determined	Genome-fragment	NA	NA
A09_idba_523	16906	No	NA	23	9	1	Low-quality	Genome-fragment	46.68	AAI-based
A09_idba_528	16692	No	NA	30	4	0	Low-quality	Genome-fragment	43.04	AAI-based
A09_idba_530	16622	No	NA	28	4	1	Low-quality	Genome-fragment	18.81	AAI-based
A09_idba_533	16524	No	NA	18	3	0	Low-quality	Genome-fragment	45.21	AAI-based
A09_idba_541	16339	No	NA	16	0	3	Low-quality	Genome-fragment	15.34	AAI-based
A09_idba_542	16315	No	NA	31	4	1	Low-quality	Genome-fragment	45.38	AAI-based
A09_idba_544	16246	No	NA	13	0	11	Not-determined	Genome-fragment	NA	NA
A09_idba_547	16210	No	NA	17	0	16	Low-quality	Genome-fragment	11.69	AAI-based
A09_idba_565	15770	No	NA	9	0	9	Not-determined	Genome-fragment	NA	NA
A09_idba_569	15572	No	NA	20	0	4	Not-determined	Genome-fragment	NA	NA
A09_idba_570	15555	No	NA	19	8	0	Low-quality	Genome-fragment	41.12	AAI-based
A09_idba_572	15492	No	NA	12	0	7	Not-determined	Genome-fragment	NA	NA
A09_idba_580	15311	No	NA	14	0	11	Low-quality	Genome-fragment	8.93	AAI-based
A09_idba_583	15272	No	NA	12	0	8	Low-quality	Genome-fragment	1.32	AAI-based
A09_idba_588	15140	No	NA	18	0	0	Low-quality	Genome-fragment	6.11	AAI-based
A09_idba_589	15056	No	NA	21	0	13	Not-determined	Genome-fragment	NA	NA
A09_idba_592	15020	No	NA	13	5	0	Low-quality	Genome-fragment	9.25	AAI-based
A09_idba_606	14740	No	NA	9	0	6	Not-determined	Genome-fragment	NA	NA
A09_idba_607	14729	No	NA	11	0	11	Not-determined	Genome-fragment	NA	NA
[truncated: 364,520+ more rows]
[truncated: 24 more columns]

## Sheet: Hq-vOTUs 
contig_id	contig_length	provirus	proviral_length	gene_count	viral_genes	host_genes	checkv_quality	miuvig_quality	completeness	completeness_method
A01_idba_3	173053	No	NA	201	45	4	Complete	High-quality	100	DTR
A01_idba_16	138392	No	NA	184	34	7	Complete	High-quality	100	DTR
A01_idba_25	113823	No	NA	131	5	88	High-quality	High-quality	96.77	HMM-based
A01_idba_34	102892	No	NA	133	19	4	Complete	High-quality	100	ITR
A01_idba_37	98901	No	NA	116	18	1	High-quality	High-quality	99.84	AAI-based
A01_idba_43	94811	No	NA	87	11	5	High-quality	High-quality	98.67	AAI-based
A01_idba_51	85952	No	NA	114	13	2	Complete	High-quality	100	DTR
A01_idba_55	82426	No	NA	137	22	0	Complete	High-quality	100	DTR
A01_idba_58	80389	No	NA	126	22	2	Complete	High-quality	100	DTR
A01_idba_60	79215	No	NA	107	11	1	Complete	High-quality	100	DTR
A01_idba_61	78986	No	NA	95	12	0	Complete	High-quality	100	DTR
A01_idba_70	73792	No	NA	111	21	2	Complete	High-quality	100	DTR
A01_idba_73	72949	No	NA	90	13	1	Complete	High-quality	100	DTR
A01_idba_91	63294	No	NA	97	31	1	High-quality	High-quality	98.14	AAI-based
A01_idba_100	60271	No	NA	82	18	1	High-quality	High-quality	100	AAI-based
A01_idba_102	59718	No	NA	87	36	0	Complete	High-quality	100	DTR
A01_idba_109	58341	No	NA	107	17	1	High-quality	High-quality	100	AAI-based
A01_idba_112	57735	No	NA	102	21	5	Complete	High-quality	100	DTR
A01_idba_113	57714	No	NA	85	16	2	High-quality	High-quality	100	AAI-based
A01_idba_115	57299	No	NA	97	18	3	High-quality	High-quality	95.46	AAI-based
A01_idba_118	56118	No	NA	86	34	0	High-quality	High-quality	90.12	AAI-based
A01_idba_126	53834	No	NA	82	22	2	Complete	High-quality	100	DTR
A01_idba_129	53500	No	NA	63	3	3	Complete	High-quality	100	DTR
A01_idba_131	52975	No	NA	82	29	0	Complete	High-quality	100	DTR
A01_idba_132	51932	No	NA	81	14	0	Complete	High-quality	100	DTR
A01_idba_137	50720	No	NA	87	18	0	High-quality	High-quality	99.56	AAI-based
A01_idba_148	48405	No	NA	86	20	0	Complete	High-quality	100	DTR
A01_idba_149	48396	No	NA	67	10	2	High-quality	High-quality	97.32	AAI-based
A01_idba_157	47026	No	NA	62	16	0	Complete	High-quality	100	DTR
A01_idba_159	46274	No	NA	78	18	1	High-quality	High-quality	100	AAI-based
A01_idba_160	46167	No	NA	60	5	0	High-quality	High-quality	100	AAI-based
A01_idba_162	46092	No	NA	77	18	0	Complete	High-quality	100	DTR
A01_idba_163	46069	No	NA	79	16	0	Complete	High-quality	100	DTR
A01_idba_169	45289	No	NA	69	12	1	High-quality	High-quality	98.75	AAI-based
A01_idba_171	45005	No	NA	62	12	3	High-quality	High-quality	94.69	AAI-based
A01_idba_175	44836	No	NA	81	13	1	High-quality	High-quality	100	AAI-based
A01_idba_179	44443	No	NA	63	28	0	High-quality	High-quality	97.01	AAI-based
A01_idba_182	44256	No	NA	79	18	0	Complete	High-quality	100	DTR
A01_idba_186	43313	No	NA	60	9	1	Complete	High-quality	100	DTR
A01_idba_191	42868	No	NA	51	7	1	High-quality	High-quality	94.91	AAI-based
A01_idba_197	42217	No	NA	62	8	1	Complete	High-quality	100	DTR
A01_idba_200	41868	No	NA	43	9	1	High-quality	High-quality	99.32	AAI-based
A01_idba_202	41539	No	NA	70	17	0	High-quality	High-quality	95.72	AAI-based
A01_idba_203	41429	No	NA	51	6	0	Complete	High-quality	100	DTR
A01_idba_217	39570	No	NA	49	10	1	Complete	High-quality	100	DTR
A01_idba_225	39149	No	NA	59	9	3	High-quality	High-quality	100	AAI-based
A01_idba_228	38785	No	NA	54	26	0	Complete	High-quality	100	DTR
A01_idba_229	38778	No	NA	50	18	1	High-quality	High-quality	96.36	AAI-based
A01_idba_231	38341	No	NA	47	7	0	Complete	High-quality	100	DTR
A01_idba_239	37322	No	NA	58	23	0	High-quality	High-quality	100	AAI-based
A01_idba_240	37205	No	NA	51	13	0	High-quality	High-quality	91.46	AAI-based
A01_idba_241	37116	No	NA	66	22	1	Complete	High-quality	100	DTR
A01_idba_248	36418	No	NA	67	19	1	High-quality	High-quality	99.02	AAI-based
A01_idba_251	35933	No	NA	45	10	1	Complete	High-quality	100	DTR
A01_idba_256	35296	No	NA	51	20	0	Complete	High-quality	100	DTR
A01_idba_258	35225	No	NA	55	15	0	Complete	High-quality	100	DTR
A01_idba_259	35184	No	NA	60	19	1	Complete	High-quality	100	DTR
A01_idba_263	34802	No	NA	63	18	0	Complete	High-quality	100	DTR
A01_idba_272	33749	No	NA	60	19	1	High-quality	High-quality	96.77	AAI-based
A01_idba_278	33246	No	NA	58	22	0	High-quality	High-quality	100	AAI-based
A01_idba_298	31470	No	NA	49	13	0	High-quality	High-quality	92.96	AAI-based
A01_idba_625	15901	No	NA	26	7	1	High-quality	High-quality	95.79	AAI-based
A01_idba_891	11465	No	NA	19	3	0	Complete	High-quality	100	DTR
A02_idba_6	183878	No	NA	206	18	4	Complete	High-quality	100	DTR
A02_idba_8	170458	No	NA	177	26	6	Complete	High-quality	100	DTR
A02_idba_10	147091	No	NA	204	37	3	High-quality	High-quality	99.87	AAI-based
A02_idba_16	142898	No	NA	142	1	72	High-quality	High-quality	91.3	HMM-based
A02_idba_24	127417	No	NA	176	34	3	High-quality	High-quality	95.7	AAI-based
A02_idba_41	101874	No	NA	85	1	48	High-quality	High-quality	100	HMM-based
A02_idba_43	100052	No	NA	104	16	1	High-quality	High-quality	100	AAI-based
A02_idba_49	94513	No	NA	134	22	1	Complete	High-quality	100	DTR
A02_idba_50	94109	Yes	83212	89	10	5	Complete	High-quality	100	DTR
A02_idba_51	94028	No	NA	94	11	1	Complete	High-quality	100	DTR
A02_idba_58	82705	No	NA	138	21	1	Complete	High-quality	100	DTR
A02_idba_65	79446	No	NA	99	13	0	Complete	High-quality	100	DTR
A02_idba_66	78474	No	NA	118	26	5	High-quality	High-quality	97.62	AAI-based
A02_idba_70	77200	No	NA	100	12	1	Complete	High-quality	100	DTR
A02_idba_83	70804	No	NA	104	15	3	High-quality	High-quality	100	AAI-based
A02_idba_92	67161	No	NA	67	1	28	High-quality	High-quality	100	HMM-based
A02_idba_98	65952	No	NA	100	29	4	Complete	High-quality	100	DTR
A02_idba_101	65410	No	NA	109	29	1	High-quality	High-quality	100	AAI-based						idba	NGS
A02_idba_102	65160	No	NA	89	23	1	Complete	High-quality	100	DTR
A02_idba_104	64852	No	NA	96	33	1	High-quality	High-quality	100	AAI-based
A02_idba_106	63726	No	NA	74	12	4	Complete	High-quality	100	DTR
A02_idba_112	62108	No	NA	99	20	0	High-quality	High-quality	99.38	AAI-based
A02_idba_113	62020	No	NA	99	17	2	Complete	High-quality	100	DTR
A02_idba_114	61994	No	NA	93	31	1	High-quality	High-quality	99.72	AAI-based
A02_idba_116	61839	No	NA	78	18	0	High-quality	High-quality	91.35	AAI-based
A02_idba_121	60815	No	NA	78	20	0	High-quality	High-quality	100	AAI-based
A02_idba_124	59912	No	NA	81	32	1	High-quality	High-quality	100	AAI-based
A02_idba_127	59047	Yes	56098	102	16	3	Complete	High-quality	100	DTR
A02_idba_136	57281	No	NA	76	23	1	High-quality	High-quality	95.86	AAI-based
A02_idba_142	55905	Yes	54766	64	11	5	High-quality	High-quality	100	AAI-based
A02_idba_174	50371	No	NA	90	18	1	Complete	High-quality	100	DTR
A02_idba_175	50104	No	NA	92	20	0	Complete	High-quality	100	DTR
A02_idba_185	48915	No	NA	77	29	1	Complete	High-quality	100	DTR
A02_idba_186	48837	No	NA	67	12	1	Complete	High-quality	100	DTR
A02_idba_194	47884	No	NA	69	18	1	High-quality	High-quality	92.74	AAI-based
A02_idba_207	45742	No	NA	66	18	1	High-quality	High-quality	97.72	AAI-based
A02_idba_208	45682	No	NA	73	23	0	Complete	High-quality	100	DTR
A02_idba_209	45531	No	NA	61	11	1	Complete	High-quality	100	DTR
A02_idba_210	45530	No	NA	59	22	0	Complete	High-quality	100	DTR
A02_idba_211	45433	No	NA	75	13	0	Complete	High-quality	100	DTR
A02_idba_212	44778	Yes	42044	69	9	4	Complete	High-quality	100	DTR
A02_idba_216	44310	No	NA	42	1	10	High-quality	High-quality	100	HMM-based
A02_idba_218	44121	No	NA	79	14	2	Complete	High-quality	100	DTR
A02_idba_219	44113	No	NA	48	5	3	High-quality	High-quality	100	AAI-based
A02_idba_223	43861	No	NA	64	20	1	Complete	High-quality	100	DTR
A02_idba_232	42603	No	NA	55	13	1	Complete	High-quality	100	DTR
A02_idba_234	42490	No	NA	44	14	0	Complete	High-quality	100	DTR
A02_idba_235	42453	No	NA	66	27	1	Complete	High-quality	100	DTR
A02_idba_246	41156	No	NA	56	24	0	Complete	High-quality	100	DTR
A02_idba_247	40998	No	NA	64	20	0	Complete	High-quality	100	DTR
A02_idba_249	40950	No	NA	65	16	1	Complete	High-quality	100	DTR
A02_idba_250	40911	No	NA	43	10	0	High-quality	High-quality	99.06	AAI-based
A02_idba_253	40758	No	NA	53	3	0	Complete	High-quality	100	DTR
A02_idba_254	40758	No	NA	77	17	1	Complete	High-quality	100	DTR
A02_idba_256	40490	No	NA	52	26	1	High-quality	High-quality	97.52	AAI-based
A02_idba_262	40137	No	NA	39	7	1	High-quality	High-quality	93.71	AAI-based
A02_idba_266	40008	No	NA	65	20	1	Complete	High-quality	100	DTR
A02_idba_267	40006	No	NA	53	7	0	Complete	High-quality	100	DTR
A02_idba_269	39932	No	NA	48	6	0	High-quality	High-quality	93.53	AAI-based
A02_idba_273	39686	No	NA	55	24	2	High-quality	High-quality	94.8	AAI-based
A02_idba_274	39667	No	NA	55	15	1	Complete	High-quality	100	DTR
A02_idba_276	39455	No	NA	68	24	3	Complete	High-quality	100	ITR
A02_idba_279	39283	No	NA	42	8	1	Complete	High-quality	100	DTR
A02_idba_289	37988	Yes	36026	57	22	2	High-quality	High-quality	96.13	AAI-based
A02_idba_298	37255	No	NA	57	20	1	High-quality	High-quality	100	AAI-based
A02_idba_306	36940	No	NA	74	18	0	Complete	High-quality	100	DTR
A02_idba_307	36926	No	NA	55	17	0	High-quality	High-quality	100	AAI-based
A02_idba_311	35977	No	NA	53	24	0	High-quality	High-quality	100	AAI-based
A02_idba_324	35196	No	NA	52	14	1	High-quality	High-quality	97.96	AAI-based
A02_idba_328	34833	No	NA	50	15	0	Complete	High-quality	100	DTR
A02_idba_344	33629	No	NA	47	11	0	Complete	High-quality	100	DTR
A02_idba_364	32119	No	NA	59	21	0	Complete	High-quality	100	ITR
A02_idba_428	28021	No	NA	47	20	2	High-quality	High-quality	91.95	AAI-based
A02_idba_646	19817	Yes	17184	30	2	2	Complete	High-quality	100	DTR
A02_idba_1092	11293	No	NA	13	1	0	High-quality	High-quality	100	HMM-based
A02_idba_1183	10319	No	NA	13	1	5	High-quality	High-quality	100	HMM-based
A02_idba_2312	5126	No	NA	8	5	0	Complete	High-quality	100	DTR
A02_idba_2333	5075	No	NA	10	0	0	Complete	High-quality	100	DTR						genes	detected	idba	NGS
A08_idba_2	240840	No	NA	247	4	165	High-quality	High-quality	100	HMM-based
A08_idba_8	185490	No	NA	215	31	2	Complete	High-quality	100	DTR
A08_idba_17	149381	No	NA	195	13	2	High-quality	High-quality	97.1	AAI-based
A08_idba_18	145839	No	NA	174	34	5	Complete	High-quality	100	DTR
A08_idba_21	138434	Yes	132024	187	36	6	Complete	High-quality	100	DTR
A08_idba_31	99932	No	NA	98	18	2	High-quality	High-quality	98.84	AAI-based
A08_idba_38	89318	No	NA	157	28	2	Complete	High-quality	100	DTR
A08_idba_77	61957	No	NA	90	36	1	High-quality	High-quality	100	AAI-based
A08_idba_83	61179	No	NA	93	21	0	Complete	High-quality	100	DTR
A08_idba_87	60282	No	NA	83	14	3	High-quality	High-quality	100	AAI-based
A08_idba_94	57268	No	NA	81	32	1	Complete	High-quality	100	DTR
A08_idba_103	54242	No	NA	83	23	1	Complete	High-quality	100	DTR
A08_idba_105	53399	No	NA	44	1	9	High-quality	High-quality	100	HMM-based
A08_idba_110	51187	No	NA	92	16	1	Complete	High-quality	100	DTR
A08_idba_112	49741	No	NA	57	23	1	Complete	High-quality	100	DTR
A08_idba_116	48683	No	NA	43	3	22	High-quality	High-quality	100	AAI-based
A08_idba_135	43938	No	NA	61	14	0	High-quality	High-quality	95.04	AAI-based
A08_idba_141	42980	No	NA	55	16	0	Complete	High-quality	100	DTR
A08_idba_143	42802	No	NA	82	16	0	High-quality	High-quality	100	AAI-based
A08_idba_145	42358	No	NA	65	18	1	High-quality	High-quality	94.37	AAI-based
A08_idba_148	42032	No	NA	71	10	0	Complete	High-quality	100	DTR
A08_idba_152	40244	No	NA	62	21	2	Complete	High-quality	100	DTR
A08_idba_155	39993	No	NA	50	28	1	Complete	High-quality	100	DTR
A08_idba_157	39624	No	NA	55	10	0	Complete	High-quality	100	DTR
A08_idba_158	39577	No	NA	59	20	0	Complete	High-quality	100	DTR
A08_idba_160	39459	No	NA	65	19	1	Complete	High-quality	100	DTR
A08_idba_162	39107	No	NA	57	11	0	Complete	High-quality	100	DTR
A08_idba_163	39021	No	NA	58	17	1	Complete	High-quality	100	DTR
A08_idba_165	38802	No	NA	51	17	0	Complete	High-quality	100	DTR
A08_idba_172	38067	No	NA	65	13	3	High-quality	High-quality	99.24	AAI-based
A08_idba_173	37956	No	NA	54	19	0	High-quality	High-quality	91.08	AAI-based
A08_idba_177	37513	No	NA	48	23	2	High-quality	High-quality	100	AAI-based
A08_idba_181	37269	No	NA	50	11	0	Complete	High-quality	100	DTR
A08_idba_187	36247	No	NA	49	18	1	Complete	High-quality	100	DTR
A08_idba_193	35664	No	NA	59	20	0	Complete	High-quality	100	DTR
A08_idba_194	35583	No	NA	61	21	1	High-quality	High-quality	94.45	AAI-based
A08_idba_207	34288	No	NA	54	18	0	High-quality	High-quality	96.77	AAI-based
A08_idba_210	33929	No	NA	49	18	0	High-quality	High-quality	97.9	AAI-based
A08_idba_220	33308	No	NA	57	16	0	High-quality	High-quality	93.64	AAI-based
A08_idba_252	28787	No	NA	41	15	0	Complete	High-quality	100	DTR
A08_idba_262	28046	No	NA	42	16	0	Complete	High-quality	100	DTR
A08_idba_544	13471	No	NA	16	3	0	Complete	High-quality	100	ITR
A08_idba_1030	6021	No	NA	6	4	0	Complete	High-quality	100	DTR
A09_idba_7	204947	No	NA	183	8	106	High-quality	High-quality	100	HMM-based
A09_idba_24	112716	No	NA	140	7	15	High-quality	High-quality	100	AAI-based
A09_idba_37	89369	No	NA	101	19	1	High-quality	High-quality	90.86	AAI-based
A09_idba_38	89257	No	NA	140	17	2	High-quality	High-quality	100	AAI-based
A09_idba_44	80576	No	NA	115	24	2	High-quality	High-quality	94.88	AAI-based
A09_idba_46	76818	No	NA	108	13	0	Complete	High-quality	100	DTR
A09_idba_48	75751	No	NA	117	19	3	Complete	High-quality	100	DTR
A09_idba_53	73967	No	NA	115	17	0	High-quality	High-quality	100	AAI-based
A09_idba_65	61791	No	NA	85	16	0	Complete	High-quality	100	DTR
A09_idba_68	60485	No	NA	53	6	3	High-quality	High-quality	92.59	AAI-based
A09_idba_69	60045	No	NA	100	23	3	Complete	High-quality	100	DTR
A09_idba_81	53423	No	NA	80	29	0	High-quality	High-quality	100	AAI-based
A09_idba_83	53269	No	NA	75	20	1	Complete	High-quality	100	DTR
A09_idba_86	52593	No	NA	99	18	0	Complete	High-quality	100	DTR
A09_idba_93	51142	No	NA	74	19	0	Complete	High-quality	100	DTR
A09_idba_96	49482	No	NA	92	22	0	Complete	High-quality	100	DTR
A09_idba_100	47982	No	NA	82	19	1	Complete	High-quality	100	DTR
A09_idba_105	46205	No	NA	72	12	1	High-quality	High-quality	100	AAI-based
A09_idba_109	44272	No	NA	68	14	0	Complete	High-quality	100	DTR
A09_idba_110	44136	No	NA	74	15	1	High-quality	High-quality	97.94	AAI-based
A09_idba_113	43921	No	NA	57	7	0	Complete	High-quality	100	DTR
A09_idba_116	43571	No	NA	56	4	6	High-quality	High-quality	94.47	AAI-based
A09_idba_119	43209	No	NA	81	17	1	Complete	High-quality	100	DTR
A09_idba_123	42790	No	NA	46	15	0	Complete	High-quality	100	DTR
A09_idba_124	42765	No	NA	56	13	0	High-quality	High-quality	99.01	AAI-based
A09_idba_125	42546	No	NA	60	9	0	Complete	High-quality	100	DTR
A09_idba_126	42378	No	NA	46	1	15	High-quality	High-quality	100	HMM-based
A09_idba_127	42370	No	NA	81	16	0	High-quality	High-quality	100	AAI-based
A09_idba_128	42327	No	NA	59	9	0	Complete	High-quality	100	DTR
A09_idba_129	41971	No	NA	65	16	0	High-quality	High-quality	100	AAI-based
A09_idba_141	39570	No	NA	49	10	1	Complete	High-quality	100	DTR
A09_idba_152	37346	No	NA	58	17	0	High-quality	High-quality	100	AAI-based
A09_idba_157	36794	No	NA	56	13	1	High-quality	High-quality	91.5	AAI-based
A09_idba_162	36124	No	NA	43	16	0	Complete	High-quality	100	DTR
A09_idba_163	36104	No	NA	63	17	1	High-quality	High-quality	94.69	AAI-based
A09_idba_164	35739	No	NA	51	20	0	Complete	High-quality	100	DTR
A09_idba_166	35685	No	NA	39	3	0	High-quality	High-quality	93.86	AAI-based
A09_idba_178	34109	No	NA	48	14	0	Complete	High-quality	100	DTR
A09_idba_182	33691	No	NA	56	16	0	High-quality	High-quality	100	AAI-based
A09_idba_199	32271	No	NA	51	16	0	High-quality	High-quality	100	AAI-based
A09_idba_417	19565	Yes	16886	30	3	2	Complete	High-quality	100	DTR
A09_idba_657	13886	No	NA	23	5	0	Complete	High-quality	100	ITR
A09_idba_681	13486	No	NA	18	5	0	High-quality	High-quality	98.41	AAI-based
A09_idba_734	12640	No	NA	17	4	0	Complete	High-quality	100	ITR
A09_idba_794	11726	No	NA	11	1	1	High-quality	High-quality	100	HMM-based
A107_idba_10	157793	No	NA	151	2	64	High-quality	High-quality	95.66	HMM-based
A107_idba_11	157435	No	NA	145	1	90	High-quality	High-quality	100	HMM-based
A107_idba_16	137342	Yes	131804	179	36	5	Complete	High-quality	100	DTR
A107_idba_31	110909	No	NA	98	1	75	High-quality	High-quality	100	HMM-based
A107_idba_36	99557	No	NA	105	13	1	Complete	High-quality	100	DTR
A107_idba_39	98473	No	NA	121	17	3	Complete	High-quality	100	DTR
A107_idba_46	89499	No	NA	153	30	2	High-quality	High-quality	100	AAI-based
A107_idba_48	86828	No	NA	131	17	1	High-quality	High-quality	98.59	AAI-based
A107_idba_52	83786	No	NA	76	1	49	High-quality	High-quality	100	HMM-based
A107_idba_60	76618	No	NA	112	27	2	High-quality	High-quality	95.32	AAI-based
A107_idba_65	75081	No	NA	105	45	4	High-quality	High-quality	100	AAI-based
A107_idba_78	67639	No	NA	103	29	4	Complete	High-quality	100	DTR
A107_idba_84	61456	No	NA	85	31	1	High-quality	High-quality	100	AAI-based
A107_idba_89	58544	No	NA	77	11	5	High-quality	High-quality	100	AAI-based
A107_idba_91	57905	No	NA	95	19	2	High-quality	High-quality	100	AAI-based
A107_idba_96	56007	No	NA	101	23	0	Complete	High-quality	100	DTR
A107_idba_99	54000	No	NA	93	21	0	Complete	High-quality	100	DTR
A107_idba_100	53880	No	NA	82	23	1	High-quality	High-quality	98.53	AAI-based
A107_idba_101	53604	No	NA	71	29	0	High-quality	High-quality	100	AAI-based
A107_idba_102	53333	No	NA	82	16	2	High-quality	High-quality	90.01	AAI-based
A107_idba_104	52714	No	NA	96	22	0	High-quality	High-quality	100	AAI-based
A107_idba_105	50167	No	NA	65	13	1	Complete	High-quality	100	DTR
A107_idba_106	49998	No	NA	65	13	1	High-quality	High-quality	100	AAI-based
A107_idba_114	46010	No	NA	71	13	1	Complete	High-quality	100	DTR
A107_idba_115	45758	No	NA	67	14	1	Complete	High-quality	100	DTR
A107_idba_117	45585	No	NA	70	29	0	Complete	High-quality	100	DTR
A107_idba_122	42559	No	NA	54	6	0	High-quality	High-quality	97.18	AAI-based
A107_idba_124	42074	No	NA	46	10	1	Complete	High-quality	100	DTR
A107_idba_126	41245	No	NA	57	28	1	High-quality	High-quality	99.21	AAI-based
A107_idba_128	40821	No	NA	59	27	2	Complete	High-quality	100	DTR
A107_idba_130	40556	No	NA	63	7	0	High-quality	High-quality	94.06	AAI-based
A107_idba_131	40503	No	NA	61	14	0	Complete	High-quality	100	DTR
A107_idba_132	40335	No	NA	61	26	0	Complete	High-quality	100	DTR
A107_idba_135	38987	No	NA	55	10	0	Complete	High-quality	100	DTR
A107_idba_137	38818	No	NA	46	12	1	Complete	High-quality	100	DTR
A107_idba_138	38751	No	NA	57	13	2	High-quality	High-quality	94.88	AAI-based
A107_idba_139	38736	No	NA	51	26	2	High-quality	High-quality	94.96	AAI-based
A107_idba_147	37286	No	NA	50	18	2	High-quality	High-quality	93.78	AAI-based
A107_idba_148	37166	No	NA	62	14	1	High-quality	High-quality	100	AAI-based
A107_idba_151	36459	No	NA	53	21	0	High-quality	High-quality	97.36	AAI-based
A107_idba_154	35799	No	NA	52	19	0	Complete	High-quality	100	DTR
A107_idba_158	34911	No	NA	48	13	1	High-quality	High-quality	97.07	AAI-based
A107_idba_164	34082	No	NA	52	12	2	High-quality	High-quality	99.95	AAI-based
A107_idba_169	33051	No	NA	55	22	0	High-quality	High-quality	94.46	AAI-based
A107_idba_170	32790	No	NA	53	16	0	High-quality	High-quality	94.91	AAI-based
A107_idba_175	31859	No	NA	40	14	1	High-quality	High-quality	97.49	AAI-based
A107_idba_190	29323	No	NA	47	21	0	Complete	High-quality	100	DTR
A11_idba_2	177488	No	NA	202	31	4	Complete	High-quality	100	DTR
A11_idba_3	174645	No	NA	267	27	3	Complete	High-quality	100	ITR
A11_idba_16	122334	No	NA	151	38	4	Complete	High-quality	100	DTR
A11_idba_31	91381	No	NA	119	23	2	High-quality	High-quality	91.3	AAI-based
A11_idba_33	87363	No	NA	115	14	2	Complete	High-quality	100	DTR
A11_idba_34	85819	No	NA	132	41	2	Complete	High-quality	100	DTR
A11_idba_36	84209	No	NA	108	17	3	High-quality	High-quality	96.33	AAI-based
A11_idba_47	72583	No	NA	93	20	7	Complete	High-quality	100	DTR
A11_idba_50	71059	No	NA	111	15	5	Complete	High-quality	100	DTR
A11_idba_57	65144	No	NA	63	7	3	Complete	High-quality	100	DTR
A11_idba_62	63166	No	NA	86	22	0	Complete	High-quality	100	DTR
A11_idba_69	58570	No	NA	105	19	1	Complete	High-quality	100	DTR
A11_idba_71	57776	No	NA	87	35	1	High-quality	High-quality	96.25	AAI-based
A11_idba_72	57633	No	NA	76	13	3	Complete	High-quality	100	DTR
A11_idba_77	55764	No	NA	78	14	0	High-quality	High-quality	98.84	AAI-based
A11_idba_83	53819	No	NA	95	16	1	Complete	High-quality	100	DTR
A11_idba_86	53650	No	NA	73	30	0	Complete	High-quality	100	DTR
A11_idba_91	52705	No	NA	80	21	1	High-quality	High-quality	96.38	AAI-based
A11_idba_104	50097	No	NA	65	12	1	High-quality	High-quality	98.73	AAI-based
A11_idba_115	48371	No	NA	83	15	0	Complete	High-quality	100	DTR
A11_idba_118	47689	No	NA	68	22	1	Complete	High-quality	100	DTR
A11_idba_119	47532	No	NA	68	21	0	High-quality	High-quality	97.12	AAI-based
A11_idba_121	47233	No	NA	87	14	0	High-quality	High-quality	90.54	AAI-based
A11_idba_125	46429	No	NA	60	13	0	Complete	High-quality	100	DTR
A11_idba_128	45760	No	NA	68	10	0	Complete	High-quality	100	DTR
A11_idba_129	45516	No	NA	54	36	0	Complete	High-quality	100	DTR
A11_idba_130	45024	No	NA	51	4	2	High-quality	High-quality	98	AAI-based
A11_idba_132	44719	No	NA	59	10	1	Complete	High-quality	100	DTR
A11_idba_134	44636	No	NA	72	18	0	Complete	High-quality	100	DTR
A11_idba_141	43882	No	NA	69	18	0	High-quality	High-quality	93.01	AAI-based
A11_idba_144	43017	No	NA	68	28	0	Complete	High-quality	100	DTR
A11_idba_146	42804	No	NA	62	25	0	Complete	High-quality	100	DTR
A11_idba_147	42769	No	NA	82	16	0	High-quality	High-quality	100	AAI-based
A11_idba_149	42385	No	NA	61	18	2	High-quality	High-quality	98.65	AAI-based
A11_idba_150	42306	No	NA	43	10	0	High-quality	High-quality	100	AAI-based
A11_idba_152	41966	No	NA	70	25	2	Complete	High-quality	100	DTR
A11_idba_153	41825	No	NA	64	19	0	High-quality	High-quality	100	AAI-based
A11_idba_156	41527	No	NA	56	14	1	Complete	High-quality	100	DTR
A11_idba_162	40746	No	NA	63	21	1	Complete	High-quality	100	DTR
A11_idba_163	40722	No	NA	65	24	2	Complete	High-quality	100	DTR
A11_idba_165	40620	No	NA	67	19	0	Complete	High-quality	100	DTR
A11_idba_172	39711	No	NA	68	31	1	Complete	High-quality	100	ITR
A11_idba_173	39708	No	NA	66	17	0	Complete	High-quality	100	DTR
A11_idba_176	39495	No	NA	55	13	1	High-quality	High-quality	100	AAI-based
A11_idba_178	39276	No	NA	61	24	3	Complete	High-quality	100	DTR
A11_idba_179	39201	No	NA	51	7	1	High-quality	High-quality	96.69	AAI-based
A11_idba_192	37602	No	NA	44	19	0	Complete	High-quality	100	DTR
A11_idba_200	36379	No	NA	46	23	0	Complete	High-quality	100	DTR
A11_idba_201	36351	No	NA	55	15	2	Complete	High-quality	100	DTR
A11_idba_205	35886	No	NA	59	16	0	Complete	High-quality	100	DTR
A11_idba_208	35744	No	NA	63	18	1	High-quality	High-quality	96.56	AAI-based
A11_idba_212	35199	No	NA	56	19	1	Complete	High-quality	100	DTR
A11_idba_215	34889	No	NA	50	15	0	High-quality	High-quality	95.81	AAI-based
A11_idba_217	34529	No	NA	53	20	0	Complete	High-quality	100	DTR
A11_idba_219	34240	No	NA	47	19	0	High-quality	High-quality	100	AAI-based
A11_idba_222	33979	No	NA	53	7	1	High-quality	High-quality	94.57	AAI-based
A11_idba_230	33548	No	NA	37	1	15	High-quality	High-quality	100	HMM-based
A11_idba_234	33109	No	NA	49	11	0	Complete	High-quality	100	DTR
A11_idba_235	32887	No	NA	55	17	0	High-quality	High-quality	91.05	AAI-based
A11_idba_240	32750	No	NA	46	17	1	High-quality	High-quality	91.17	AAI-based
A11_idba_247	31053	No	NA	44	20	1	Complete	High-quality	100	DTR
A11_idba_533	17508	No	NA	11	1	1	High-quality	High-quality	100	HMM-based
A11_idba_691	14319	No	NA	24	2	0	Complete	High-quality	100	DTR
A11_idba_692	14299	No	NA	18	7	0	High-quality	High-quality	90.37	AAI-based
A11_idba_723	13744	No	NA	14	6	0	High-quality	High-quality	98.96	AAI-based
A13_idba_2	245589	Yes	82639	268	14	156	High-quality	High-quality	99.73	HMM-based
A13_idba_5	185711	No	NA	157	6	96	High-quality	High-quality	100	HMM-based
A13_idba_8	175902	No	NA	207	29	2	High-quality	High-quality	93.94	AAI-based
A13_idba_9	167163	Yes	109711	205	28	28	Complete	High-quality	100	Provirus
A13_idba_14	149451	No	NA	131	1	79	High-quality	High-quality	100	HMM-based
A13_idba_22	115388	No	NA	103	1	63	High-quality	High-quality	100	HMM-based
A13_idba_26	101037	No	NA	102	17	0	Complete	High-quality	100	DTR
A13_idba_28	99029	No	NA	101	15	1	Complete	High-quality	100	DTR
A13_idba_31	93903	No	NA	93	11	1	Complete	High-quality	100	DTR
A13_idba_58	60104	No	NA	85	14	3	High-quality	High-quality	100	AAI-based
A13_idba_61	59057	No	NA	85	13	4	Complete	High-quality	100	ITR
A13_idba_62	58248	No	NA	92	14	2	High-quality	High-quality	100	AAI-based
A13_idba_67	54846	No	NA	76	24	1	Complete	High-quality	100	DTR
A13_idba_70	54242	No	NA	83	23	1	Complete	High-quality	100	DTR
A13_idba_71	53457	No	NA	56	1	32	High-quality	High-quality	100	HMM-based
A13_idba_82	46330	No	NA	66	18	1	High-quality	High-quality	98.98	AAI-based
A13_idba_84	45707	No	NA	80	20	0	Complete	High-quality	100	DTR
A13_idba_85	45233	No	NA	58	10	1	Complete	High-quality	100	DTR
A13_idba_87	45087	No	NA	64	31	0	Complete	High-quality	100	DTR
A13_idba_92	43453	No	NA	70	22	0	Complete	High-quality	100	DTR
A13_idba_93	42774	No	NA	82	16	0	High-quality	High-quality	100	AAI-based
A13_idba_94	42764	No	NA	55	11	0	Complete	High-quality	100	DTR
A13_idba_95	42550	No	NA	58	16	0	Complete	High-quality	100	DTR
A13_idba_96	42508	No	NA	65	18	1	High-quality	High-quality	94.71	AAI-based
A13_idba_98	42225	No	NA	60	20	1	Complete	High-quality	100	DTR
A13_idba_99	42103	No	NA	61	13	1	Complete	High-quality	100	DTR
A13_idba_106	41299	No	NA	60	24	3	Complete	High-quality	100	DTR
A13_idba_108	40863	No	NA	47	44	0	Complete	High-quality	100	DTR
A13_idba_111	40092	No	NA	60	12	1	Complete	High-quality	100	DTR
A13_idba_114	39710	No	NA	59	18	0	Complete	High-quality	100	DTR
A13_idba_115	39346	No	NA	52	9	1	High-quality	High-quality	91.08	AAI-based
A13_idba_117	39277	No	NA	55	18	0	High-quality	High-quality	100	AAI-based
A13_idba_118	38924	No	NA	63	21	2	High-quality	High-quality	100	AAI-based
A13_idba_120	38816	No	NA	58	23	0	High-quality	High-quality	94.67	AAI-based
A13_idba_122	38423	No	NA	47	12	0	High-quality	High-quality	97.91	AAI-based
A13_idba_124	38395	No	NA	59	12	0	Complete	High-quality	100	DTR
A13_idba_125	38393	No	NA	52	18	0	Complete	High-quality	100	DTR
A13_idba_127	38220	No	NA	59	17	0	High-quality	High-quality	98.52	AAI-based
A13_idba_128	38182	No	NA	60	19	0	High-quality	High-quality	100	AAI-based
A13_idba_135	37319	No	NA	51	11	0	Complete	High-quality	100	DTR
A13_idba_139	36907	No	NA	54	13	0	High-quality	High-quality	100	AAI-based
A13_idba_153	34266	No	NA	60	19	2	High-quality	High-quality	98.81	AAI-based
A13_idba_158	33725	No	NA	41	16	0	High-quality	High-quality	93.7	AAI-based
A13_idba_160	33450	No	NA	67	19	1	High-quality	High-quality	96.86	AAI-based
A13_idba_184	28847	No	NA	40	15	0	Complete	High-quality	100	DTR
A13_idba_189	28106	No	NA	42	16	0	Complete	High-quality	100	DTR
A13_idba_413	13471	No	NA	16	3	0	Complete	High-quality	100	ITR
A13_idba_442	12585	No	NA	23	1	0	Complete	High-quality	100	DTR
A16_idba_11	176380	No	NA	153	3	103	High-quality	High-quality	91.12	HMM-based
A16_idba_21	159913	No	NA	130	2	88	High-quality	High-quality	100	HMM-based
A16_idba_25	144401	No	NA	208	42	3	Complete	High-quality	100	DTR
A16_idba_81	85145	No	NA	113	13	2	High-quality	High-quality	98.3	AAI-based
A16_idba_100	81013	No	NA	132	22	0	High-quality	High-quality	96.22	AAI-based
A16_idba_102	80389	No	NA	126	22	2	Complete	High-quality	100	DTR
A16_idba_109	79215	No	NA	107	11	1	Complete	High-quality	100	DTR
A16_idba_121	73210	No	NA	110	21	2	High-quality	High-quality	92.34	AAI-based
A16_idba_122	72949	No	NA	90	13	1	Complete	High-quality	100	DTR
A16_idba_130	71321	No	NA	104	17	3	High-quality	High-quality	100	AAI-based
A16_idba_169	62338	No	NA	61	1	44	High-quality	High-quality	97.34	HMM-based
A16_idba_188	58750	No	NA	75	16	0	Complete	High-quality	100	DTR
A16_idba_190	58458	No	NA	108	17	1	Complete	High-quality	100	DTR
A16_idba_198	57735	No	NA	103	22	5	Complete	High-quality	100	DTR
A16_idba_210	56143	No	NA	90	14	1	Complete	High-quality	100	DTR
A16_idba_222	54806	No	NA	85	22	1	Complete	High-quality	100	DTR
A16_idba_264	49525	No	NA	80	21	1	High-quality	High-quality	100	AAI-based
A16_idba_265	49482	Yes	45237	51	8	5	High-quality	High-quality	100	AAI-based
A16_idba_270	49202	Yes	44265	50	5	6	High-quality	High-quality	100	AAI-based
A16_idba_296	46353	No	NA	78	27	0	High-quality	High-quality	94.68	AAI-based
A16_idba_300	46062	No	NA	77	18	0	Complete	High-quality	100	DTR
A16_idba_304	45740	No	NA	67	15	1	Complete	High-quality	100	DTR
A16_idba_312	45289	No	NA	69	12	1	High-quality	High-quality	98.75	AAI-based
A16_idba_315	45223	No	NA	70	21	0	High-quality	High-quality	95.85	AAI-based
A16_idba_317	45142	No	NA	57	17	1	High-quality	High-quality	100	AAI-based
A16_idba_330	44223	No	NA	66	26	1	High-quality	High-quality	100	AAI-based
A16_idba_334	43723	No	NA	62	10	1	Complete	High-quality	100	DTR
A16_idba_345	42868	No	NA	51	7	1	High-quality	High-quality	94.91	AAI-based
A16_idba_361	42097	No	NA	61	8	1	High-quality	High-quality	100	AAI-based
A16_idba_365	41892	No	NA	47	12	1	Complete	High-quality	100	DTR
A16_idba_379	41044	No	NA	69	16	0	Complete	High-quality	100	DTR
A16_idba_382	40710	No	NA	73	15	0	Complete	High-quality	100	DTR
A16_idba_386	40600	No	NA	53	40	0	High-quality	High-quality	100	AAI-based
A16_idba_397	39667	No	NA	59	14	2	Complete	High-quality	100	DTR
A16_idba_406	38775	No	NA	55	26	0	Complete	High-quality	100	DTR
A16_idba_412	38572	No	NA	50	6	0	Complete	High-quality	100	DTR
A16_idba_417	38470	Yes	36039	61	14	3	High-quality	High-quality	100	AAI-based
A16_idba_418	38415	No	NA	68	19	1	High-quality	High-quality	100	AAI-based
A16_idba_429	37668	No	NA	55	13	0	High-quality	High-quality	90.44	AAI-based
A16_idba_434	37117	No	NA	49	16	2	Complete	High-quality	100	DTR
A16_idba_443	36568	No	NA	53	18	1	High-quality	High-quality	100	AAI-based
A16_idba_446	36379	No	NA	58	17	0	High-quality	High-quality	94.19	AAI-based
A16_idba_472	35178	No	NA	55	16	0	High-quality	High-quality	100	AAI-based
A16_idba_475	34802	No	NA	63	18	0	Complete	High-quality	100	DTR
A16_idba_514	33228	No	NA	58	22	0	High-quality	High-quality	100	AAI-based
A16_idba_593	29700	No	NA	43	16	1	High-quality	High-quality	92.02	AAI-based
A16_idba_1115	16381	No	NA	28	7	1	High-quality	High-quality	98.68	AAI-based
A16_idba_1564	11465	No	NA	18	3	0	Complete	High-quality	100	DTR
A16_idba_2139	7912	No	NA	10	1	0	High-quality	High-quality	100	HMM-based
A16_idba_2444	6658	No	NA	8	3	0	Complete	High-quality	100	DTR
B03_idba_6	149028	No	NA	214	43	4	High-quality	High-quality	100	AAI-based
B03_idba_8	137483	No	NA	183	35	6	Complete	High-quality	100	DTR
B03_idba_19	102506	No	NA	113	16	0	Complete	High-quality	100	DTR
B03_idba_20	101193	No	NA	108	21	0	Complete	High-quality	100	DTR
B03_idba_23	90304	No	NA	142	17	2	High-quality	High-quality	100	AAI-based
B03_idba_27	80960	No	NA	139	19	3	Complete	High-quality	100	DTR
B03_idba_28	79379	No	NA	105	12	1	Complete	High-quality	100	DTR
B03_idba_40	64866	No	NA	87	19	0	Complete	High-quality	100	DTR
B03_idba_43	62645	No	NA	95	22	1	High-quality	High-quality	100	AAI-based
B03_idba_46	60548	No	NA	79	33	0	High-quality	High-quality	100	AAI-based
B03_idba_47	60191	No	NA	89	35	1	High-quality	High-quality	98.14	AAI-based
B03_idba_50	57592	No	NA	77	12	3	Complete	High-quality	100	DTR
B03_idba_58	55651	No	NA	95	18	2	High-quality	High-quality	98.36	AAI-based
B03_idba_59	55379	No	NA	91	18	1	High-quality	High-quality	93.83	AAI-based
B03_idba_60	55144	No	NA	85	23	1	Complete	High-quality	100	DTR
B03_idba_66	52321	No	NA	79	19	1	Complete	High-quality	100	DTR
B03_idba_74	49710	No	NA	65	34	2	Complete	High-quality	100	DTR
B03_idba_80	47731	No	NA	54	6	4	High-quality	High-quality	100	AAI-based
B03_idba_82	46700	No	NA	72	11	1	High-quality	High-quality	100	AAI-based
B03_idba_84	45995	No	NA	73	22	0	Complete	High-quality	100	DTR
B03_idba_96	44140	No	NA	55	7	1	Complete	High-quality	100	DTR
B03_idba_97	43816	No	NA	73	20	0	Complete	High-quality	100	DTR
B03_idba_100	43106	No	NA	62	18	1	Complete	High-quality	100	DTR
B03_idba_102	42552	No	NA	82	16	0	High-quality	High-quality	100	AAI-based
B03_idba_103	42388	No	NA	65	18	4	High-quality	High-quality	98.74	AAI-based
B03_idba_104	42270	No	NA	77	17	0	High-quality	High-quality	100	AAI-based
B03_idba_105	42040	No	NA	56	14	0	Complete	High-quality	100	DTR
B03_idba_107	41733	No	NA	59	29	2	Complete	High-quality	100	DTR
B03_idba_108	41691	No	NA	57	10	0	Complete	High-quality	100	ITR
B03_idba_112	41345	No	NA	52	19	0	High-quality	High-quality	99.09	AAI-based
B03_idba_114	41249	No	NA	79	17	0	High-quality	High-quality	100	AAI-based
B03_idba_120	40398	No	NA	69	24	3	Complete	High-quality	100	ITR
B03_idba_126	39969	No	NA	60	8	0	High-quality	High-quality	100	AAI-based
B03_idba_127	39709	No	NA	64	12	0	Complete	High-quality	100	DTR
B03_idba_128	39570	No	NA	48	10	1	Complete	High-quality	100	DTR
B03_idba_129	39567	No	NA	64	20	1	Complete	High-quality	100	DTR
B03_idba_132	39130	No	NA	54	17	1	High-quality	High-quality	98.96	AAI-based
B03_idba_133	38939	No	NA	55	7	1	Complete	High-quality	100	DTR
B03_idba_135	38468	No	NA	56	21	0	Complete	High-quality	100	DTR
B03_idba_136	38450	No	NA	61	16	1	High-quality	High-quality	100	AAI-based
B03_idba_140	37602	No	NA	58	21	0	Complete	High-quality	100	DTR
B03_idba_143	37346	No	NA	49	9	3	Complete	High-quality	100	DTR
B03_idba_144	37304	No	NA	42	4	0	High-quality	High-quality	98.22	AAI-based
B03_idba_147	36841	No	NA	67	21	0	High-quality	High-quality	96.52	AAI-based
B03_idba_149	36784	No	NA	49	20	0	Complete	High-quality	100	DTR
B03_idba_159	35081	No	NA	54	11	0	Complete	High-quality	100	DTR
B03_idba_162	34923	No	NA	63	18	0	Complete	High-quality	100	DTR
B03_idba_165	34690	No	NA	53	15	1	Complete	High-quality	100	DTR
B03_idba_182	32608	No	NA	50	25	1	High-quality	High-quality	97.58	AAI-based
B03_idba_185	32216	No	NA	44	22	2	Complete	High-quality	100	DTR
B03_idba_189	31818	No	NA	49	17	0	High-quality	High-quality	91.39	AAI-based
B03_idba_192	31704	No	NA	61	15	0	High-quality	High-quality	97.41	AAI-based
B03_idba_197	31062	No	NA	51	11	1	Complete	High-quality	100	DTR
B03_idba_508	16347	No	NA	26	7	1	Complete	High-quality	100	DTR
B03_idba_615	14370	No	NA	19	7	0	High-quality	High-quality	100	AAI-based
B03_idba_671	13525	No	NA	14	4	0	High-quality	High-quality	100	AAI-based
B03_idba_737	12761	No	NA	18	4	0	High-quality	High-quality	93.09	AAI-based
B03_idba_843	11502	No	NA	17	2	1	Complete	High-quality	100	DTR
B13_idba_1	180227	No	NA	227	28	4	High-quality	High-quality	98.24	AAI-based
B13_idba_2	175113	No	NA	148	5	94	High-quality	High-quality	100	HMM-based
B13_idba_3	173151	No	NA	193	35	6	Complete	High-quality	100	DTR
B13_idba_4	170595	No	NA	179	27	7	Complete	High-quality	100	DTR
B13_idba_5	156235	No	NA	190	23	4	Complete	High-quality	100	DTR
B13_idba_12	124088	No	NA	154	38	4	Complete	High-quality	100	DTR
B13_idba_23	98209	No	NA	115	21	0	High-quality	High-quality	99.6	AAI-based
B13_idba_24	98054	No	NA	97	11	1	Complete	High-quality	100	DTR
B13_idba_27	95997	No	NA	85	8	0	Complete	High-quality	100	DTR
B13_idba_31	80959	No	NA	96	15	0	Complete	High-quality	100	DTR
B13_idba_32	78410	No	NA	126	26	3	Complete	High-quality	100	DTR
B13_idba_35	75971	No	NA	97	11	0	High-quality	High-quality	93.93	AAI-based
B13_idba_67	57938	No	NA	100	18	2	Complete	High-quality	100	DTR
B13_idba_87	51627	No	NA	79	20	1	Complete	High-quality	100	DTR
B13_idba_91	50596	No	NA	80	21	0	Complete	High-quality	100	DTR
B13_idba_98	48711	No	NA	72	26	1	Complete	High-quality	100	DTR
B13_idba_114	45461	No	NA	62	31	0	High-quality	High-quality	99.21	AAI-based
B13_idba_115	45277	No	NA	75	29	0	Complete	High-quality	100	DTR
B13_idba_118	44626	No	NA	78	14	4	High-quality	High-quality	100	AAI-based
B13_idba_120	44348	No	NA	71	12	1	Complete	High-quality	100	DTR
B13_idba_121	44292	No	NA	73	20	0	High-quality	High-quality	94.06	AAI-based
B13_idba_123	43949	No	NA	78	17	0	Complete	High-quality	100	DTR
B13_idba_128	42795	No	NA	62	7	0	High-quality	High-quality	100	AAI-based
B13_idba_129	42774	No	NA	82	16	0	High-quality	High-quality	100	AAI-based
B13_idba_130	42709	No	NA	63	8	1	High-quality	High-quality	99.57	AAI-based
B13_idba_132	42503	No	NA	48	9	1	High-quality	High-quality	96.7	AAI-based
B13_idba_133	42471	No	NA	63	20	0	Complete	High-quality	100	DTR
B13_idba_137	42180	No	NA	42	10	0	Complete	High-quality	100	DTR
B13_idba_138	42154	No	NA	61	18	2	High-quality	High-quality	98.11	AAI-based
B13_idba_139	42116	No	NA	71	22	1	Complete	High-quality	100	DTR
B13_idba_140	41999	No	NA	45	7	1	Complete	High-quality	100	DTR
B13_idba_142	41899	No	NA	43	6	1	Complete	High-quality	100	DTR
B13_idba_143	41693	No	NA	75	23	1	High-quality	High-quality	90.94	AAI-based
B13_idba_145	41479	No	NA	72	18	3	Complete	High-quality	100	DTR
B13_idba_147	41194	No	NA	62	14	1	Complete	High-quality	100	DTR
B13_idba_150	40644	No	NA	69	12	0	Complete	High-quality	100	DTR
B13_idba_152	40458	No	NA	57	8	0	High-quality	High-quality	100	AAI-based
B13_idba_158	40132	No	NA	50	14	0	Complete	High-quality	100	DTR
B13_idba_159	40059	No	NA	75	23	2	Complete	High-quality	100	DTR
B13_idba_162	39560	No	NA	49	10	1	Complete	High-quality	100	DTR
B13_idba_165	39363	No	NA	60	14	4	Complete	High-quality	100	DTR
B13_idba_166	39361	No	NA	43	10	3	Complete	High-quality	100	DTR
B13_idba_171	38682	No	NA	51	17	0	High-quality	High-quality	94.67	AAI-based
B13_idba_173	38422	No	NA	67	27	0	High-quality	High-quality	95.53	AAI-based
B13_idba_175	38122	No	NA	63	14	0	Complete	High-quality	100	DTR
B13_idba_179	37791	No	NA	56	25	1	Complete	High-quality	100	DTR
B13_idba_180	37763	No	NA	56	22	1	High-quality	High-quality	100	AAI-based
B13_idba_187	37109	No	NA	58	11	0	Complete	High-quality	100	DTR
B13_idba_190	37004	No	NA	52	7	3	High-quality	High-quality	93.63	AAI-based
B13_idba_193	36668	No	NA	58	17	0	High-quality	High-quality	95.97	AAI-based
B13_idba_194	36563	No	NA	52	21	1	Complete	High-quality	100	DTR
B13_idba_203	35681	No	NA	56	18	0	High-quality	High-quality	100	AAI-based
B13_idba_207	35572	No	NA	51	13	1	High-quality	High-quality	99.39	AAI-based
B13_idba_211	35148	No	NA	55	20	1	High-quality	High-quality	100	AAI-based
B13_idba_219	34611	No	NA	56	25	0	High-quality	High-quality	98.99	AAI-based
B13_idba_239	32482	No	NA	61	18	0	Complete	High-quality	100	DTR
B13_idba_258	31670	No	NA	47	13	0	Complete	High-quality	100	DTR
B13_idba_457	21155	No	NA	37	7	0	High-quality	High-quality	92.41	AAI-based
B13_idba_565	18160	No	NA	29	8	0	High-quality	High-quality	100	AAI-based
B13_idba_811	13662	No	NA	18	5	0	Complete	High-quality	100	ITR
B13_idba_1815	6579	No	NA	8	4	0	Complete	High-quality	100	DTR
B13_idba_1824	6537	No	NA	8	2	0	Complete	High-quality	100	DTR
B13_idba_2416	5069	No	NA	7	5	0	Complete	High-quality	100	DTR
DC05_idba_13	103680	No	NA	94	15	1	Complete	High-quality	100	DTR
DC05_idba_15	101346	No	NA	101	16	1	High-quality	High-quality	99.95	AAI-based
DC05_idba_22	83966	No	NA	105	15	3	Complete	High-quality	100	DTR
DC05_idba_23	81908	No	NA	131	25	3	Complete	High-quality	100	DTR
DC05_idba_25	77159	No	NA	110	13	0	Complete	High-quality	100	DTR
DC05_idba_40	58268	No	NA	101	15	2	Complete	High-quality	100	DTR
DC05_idba_41	57623	No	NA	76	12	3	Complete	High-quality	100	DTR
DC05_idba_45	55522	No	NA	80	14	4	Complete	High-quality	100	DTR
DC05_idba_46	55327	No	NA	84	26	1	High-quality	High-quality	95.89	AAI-based
DC05_idba_47	54503	No	NA	98	21	1	Complete	High-quality	100	DTR
DC05_idba_64	45582	No	NA	64	32	0	Complete	High-quality	100	DTR
DC05_idba_68	43832	No	NA	75	13	0	High-quality	High-quality	100	AAI-based
DC05_idba_69	43716	No	NA	70	25	0	High-quality	High-quality	93.3	AAI-based
DC05_idba_71	42699	No	NA	68	27	0	Complete	High-quality	100	DTR
DC05_idba_76	41349	No	NA	49	6	0	High-quality	High-quality	94.9	AAI-based
DC05_idba_79	41130	No	NA	69	18	1	High-quality	High-quality	100	AAI-based
DC05_idba_82	40128	No	NA	56	15	1	High-quality	High-quality	99.28	AAI-based
DC05_idba_85	39275	No	NA	53	19	0	Complete	High-quality	100	DTR
DC05_idba_86	38647	No	NA	55	18	0	Complete	High-quality	100	DTR
DC05_idba_91	38064	No	NA	50	10	0	Complete	High-quality	100	DTR
DC05_idba_98	36542	No	NA	50	25	1	Complete	High-quality	100	DTR
DC13_idba_4	186510	No	NA	222	25	6	Complete	High-quality	100	DTR
DC13_idba_9	155310	No	NA	195	19	2	Complete	High-quality	100	DTR
DC13_idba_65	65650	No	NA	117	22	0	High-quality	High-quality	100	AAI-based
DC13_idba_70	63519	No	NA	67	7	0	High-quality	High-quality	100	AAI-based
DC13_idba_75	61816	No	NA	96	23	1	High-quality	High-quality	100	AAI-based
DC13_idba_77	60413	No	NA	91	22	0	High-quality	High-quality	99.52	AAI-based
DC13_idba_79	60280	No	NA	89	31	1	High-quality	High-quality	99.58	AAI-based
DC13_idba_82	59039	No	NA	99	18	0	Complete	High-quality	100	DTR
DC13_idba_85	58061	No	NA	99	19	0	Complete	High-quality	100	DTR
DC13_idba_86	57908	No	NA	86	20	0	High-quality	High-quality	98.14	AAI-based
DC13_idba_98	52680	No	NA	81	13	1	High-quality	High-quality	93.63	AAI-based
DC13_idba_111	49245	Yes	42517	56	4	5	High-quality	High-quality	93.99	AAI-based
DC13_idba_115	48372	No	NA	64	12	1	Complete	High-quality	100	ITR
DC13_idba_118	48109	No	NA	46	0	17	High-quality	High-quality	100	AAI-based						genes	detected	idba	NGS
DC13_idba_120	47925	No	NA	74	42	0	Complete	High-quality	100	DTR
DC13_idba_128	45854	No	NA	66	19	0	High-quality	High-quality	100	AAI-based
DC13_idba_131	45274	No	NA	84	20	0	High-quality	High-quality	100	AAI-based
DC13_idba_137	43878	No	NA	55	25	0	Complete	High-quality	100	DTR
DC13_idba_144	43187	No	NA	66	25	1	High-quality	High-quality	96.2	AAI-based
DC13_idba_147	42855	No	NA	54	8	2	Complete	High-quality	100	DTR
DC13_idba_148	42720	No	NA	58	11	0	Complete	High-quality	100	DTR
DC13_idba_150	42492	No	NA	63	27	2	Complete	High-quality	100	DTR
DC13_idba_151	42342	Yes	29448	66	16	9	Complete	High-quality	100	Provirus
DC13_idba_157	41795	No	NA	54	29	1	Complete	High-quality	100	DTR
DC13_idba_165	40642	No	NA	51	15	2	High-quality	High-quality	100	AAI-based
DC13_idba_167	40502	No	NA	55	14	1	Complete	High-quality	100	DTR
DC13_idba_169	40336	No	NA	62	5	0	Complete	High-quality	100	DTR
DC13_idba_170	40321	No	NA	55	18	1	Complete	High-quality	100	DTR
DC13_idba_171	40196	No	NA	59	16	1	Complete	High-quality	100	DTR
DC13_idba_176	39783	No	NA	44	10	0	High-quality	High-quality	99.88	AAI-based
DC13_idba_183	39083	No	NA	69	16	0	Complete	High-quality	100	DTR
DC13_idba_185	38934	No	NA	48	5	1	Complete	High-quality	100	DTR
DC13_idba_189	38401	No	NA	50	11	0	Complete	High-quality	100	DTR
DC13_idba_195	37756	No	NA	55	16	0	High-quality	High-quality	92.72	AAI-based
DC13_idba_198	37428	No	NA	58	16	1	High-quality	High-quality	100	AAI-based
DC13_idba_201	37220	No	NA	49	5	0	High-quality	High-quality	95.18	AAI-based
DC13_idba_206	36969	No	NA	47	23	0	Complete	High-quality	100	DTR
DC13_idba_215	36268	No	NA	50	16	1	Complete	High-quality	100	DTR
DC13_idba_220	35833	No	NA	61	24	2	High-quality	High-quality	100	AAI-based
DC13_idba_223	35523	No	NA	57	19	0	Complete	High-quality	100	DTR
DC13_idba_226	35191	No	NA	64	21	5	Complete	High-quality	100	DTR
DC13_idba_230	34571	No	NA	60	15	1	Complete	High-quality	100	DTR
DC13_idba_237	33926	No	NA	47	20	1	High-quality	High-quality	91.82	AAI-based
DC13_idba_241	33710	No	NA	53	12	0	Complete	High-quality	100	DTR
DC13_idba_285	30562	No	NA	54	18	3	High-quality	High-quality	90.32	AAI-based
DC13_idba_641	17419	No	NA	28	6	0	High-quality	High-quality	100	AAI-based
DC13_idba_701	16185	No	NA	21	7	0	High-quality	High-quality	95.03	AAI-based
DC16_idba_3	234364	No	NA	226	1	160	High-quality	High-quality	95.26	HMM-based
DC16_idba_15	129357	No	NA	115	6	65	High-quality	High-quality	97.99	HMM-based
DC16_idba_22	118769	No	NA	110	1	72	High-quality	High-quality	100	HMM-based
DC16_idba_23	110662	No	NA	89	3	54	High-quality	High-quality	94.07	HMM-based
DC16_idba_50	71816	No	NA	83	31	1	Complete	High-quality	100	ITR
DC16_idba_54	65672	No	NA	113	31	0	High-quality	High-quality	95.71	AAI-based
DC16_idba_57	64519	No	NA	62	6	2	High-quality	High-quality	98.53	AAI-based
DC16_idba_64	62985	No	NA	92	19	0	High-quality	High-quality	91.71	AAI-based
DC16_idba_68	60787	No	NA	90	14	2	Complete	High-quality	100	DTR
DC16_idba_69	60342	No	NA	93	12	1	Complete	High-quality	100	ITR
DC16_idba_80	56255	No	NA	89	21	2	High-quality	High-quality	99.88	AAI-based
DC16_idba_87	53552	No	NA	76	5	3	Complete	High-quality	100	DTR
DC16_idba_99	50665	No	NA	71	32	0	High-quality	High-quality	100	AAI-based
DC16_idba_100	49943	No	NA	63	8	0	Complete	High-quality	100	DTR
DC16_idba_107	48559	No	NA	67	22	0	Complete	High-quality	100	DTR
DC16_idba_109	48208	No	NA	66	24	1	Complete	High-quality	100	DTR
DC16_idba_110	48188	No	NA	64	12	1	Complete	High-quality	100	DTR
DC16_idba_119	45099	No	NA	57	29	0	Complete	High-quality	100	DTR
DC16_idba_129	44283	No	NA	68	16	1	High-quality	High-quality	98.66	AAI-based
DC16_idba_130	44276	No	NA	82	15	2	Complete	High-quality	100	DTR
DC16_idba_131	44161	No	NA	60	27	0	Complete	High-quality	100	DTR
DC16_idba_135	43226	No	NA	60	44	0	High-quality	High-quality	100	AAI-based
DC16_idba_137	42932	No	NA	62	18	2	High-quality	High-quality	99.92	AAI-based
DC16_idba_138	42891	No	NA	83	16	0	High-quality	High-quality	100	AAI-based
DC16_idba_141	42212	No	NA	54	20	0	Complete	High-quality	100	DTR
DC16_idba_143	42085	No	NA	66	31	2	Complete	High-quality	100	DTR
DC16_idba_147	41679	No	NA	45	8	1	Complete	High-quality	100	ITR
DC16_idba_148	41508	No	NA	69	19	0	Complete	High-quality	100	DTR
DC16_idba_151	40971	No	NA	46	7	0	High-quality	High-quality	97.95	AAI-based
DC16_idba_152	40913	No	NA	48	45	0	Complete	High-quality	100	DTR
DC16_idba_159	40299	No	NA	55	38	0	High-quality	High-quality	100	AAI-based
DC16_idba_163	39676	No	NA	54	15	1	Complete	High-quality	100	DTR
DC16_idba_165	39197	No	NA	58	22	0	High-quality	High-quality	100	AAI-based
DC16_idba_166	39159	No	NA	52	15	0	High-quality	High-quality	98.69	AAI-based
DC16_idba_168	39117	No	NA	64	15	4	Complete	High-quality	100	DTR
DC16_idba_169	39095	No	NA	48	26	0	Complete	High-quality	100	DTR
DC16_idba_170	38865	No	NA	50	30	2	Complete	High-quality	100	DTR
DC16_idba_171	38828	No	NA	55	24	0	High-quality	High-quality	95.68	AAI-based
DC16_idba_174	38547	No	NA	53	21	4	Complete	High-quality	100	DTR
DC16_idba_176	38267	No	NA	49	28	1	High-quality	High-quality	91.65	AAI-based
DC16_idba_177	38174	No	NA	67	23	0	High-quality	High-quality	98.93	AAI-based
DC16_idba_183	37373	No	NA	49	18	0	Complete	High-quality	100	DTR
DC16_idba_184	37323	No	NA	42	5	1	Complete	High-quality	100	DTR
DC16_idba_193	36175	No	NA	54	8	0	Complete	High-quality	100	DTR
DC16_idba_194	36010	No	NA	51	22	0	High-quality	High-quality	99.09	AAI-based
DC16_idba_196	35861	No	NA	42	13	0	High-quality	High-quality	94.77	AAI-based
DC16_idba_200	35418	No	NA	59	21	0	High-quality	High-quality	100	AAI-based
DC16_idba_201	35318	No	NA	53	17	0	Complete	High-quality	100	DTR
DC16_idba_202	34927	No	NA	63	18	0	Complete	High-quality	100	DTR
DC16_idba_207	34707	No	NA	52	21	0	High-quality	High-quality	100	AAI-based
DC16_idba_215	33898	No	NA	48	21	0	Complete	High-quality	100	DTR
DC16_idba_217	33503	No	NA	49	17	1	Complete	High-quality	100	DTR
DC16_idba_219	33284	No	NA	52	23	1	High-quality	High-quality	92.69	AAI-based
DC16_idba_225	32579	No	NA	47	18	0	Complete	High-quality	100	DTR
DC16_idba_233	32073	No	NA	52	15	0	High-quality	High-quality	94.26	AAI-based
DC16_idba_234	31475	No	NA	50	18	3	Complete	High-quality	100	DTR
DC16_idba_249	30107	No	NA	39	27	0	High-quality	High-quality	91.98	AAI-based
DC16_idba_485	16425	No	NA	21	7	0	Complete	High-quality	100	ITR
DC16_idba_734	11272	No	NA	14	6	0	Complete	High-quality	100	ITR
DC16_idba_972	8209	No	NA	13	1	0	High-quality	High-quality	100	AAI-based
DC23_idba_2	279701	No	NA	226	6	150	High-quality	High-quality	100	HMM-based
DC23_idba_3	268632	No	NA	444	67	3	High-quality	High-quality	97.74	AAI-based
DC23_idba_8	184681	No	NA	216	23	7	High-quality	High-quality	100	AAI-based
DC23_idba_9	173642	No	NA	205	46	4	Complete	High-quality	100	DTR
DC23_idba_13	149936	No	NA	200	26	6	Complete	High-quality	100	DTR
DC23_idba_16	146655	No	NA	125	1	82	High-quality	High-quality	100	HMM-based
DC23_idba_24	118904	No	NA	148	35	3	Complete	High-quality	100	DTR
DC23_idba_36	101185	No	NA	103	16	1	High-quality	High-quality	99.75	AAI-based
DC23_idba_37	100644	No	NA	102	17	1	Complete	High-quality	100	DTR
DC23_idba_39	100330	No	NA	95	1	67	High-quality	High-quality	100	HMM-based
DC23_idba_41	99833	No	NA	125	25	2	High-quality	High-quality	100	AAI-based
DC23_idba_45	95852	No	NA	90	12	5	Complete	High-quality	100	DTR
DC23_idba_47	94679	No	NA	116	14	0	Complete	High-quality	100	DTR
DC23_idba_48	93802	No	NA	88	1	57	High-quality	High-quality	100	HMM-based
DC23_idba_63	77733	No	NA	124	22	2	High-quality	High-quality	96.39	AAI-based
DC23_idba_71	71353	No	NA	107	18	1	Complete	High-quality	100	DTR
DC23_idba_74	71022	No	NA	105	15	2	Complete	High-quality	100	DTR
DC23_idba_81	63676	No	NA	98	18	0	High-quality	High-quality	90.9	AAI-based
DC23_idba_84	63096	No	NA	62	1	21	High-quality	High-quality	95.47	HMM-based
DC23_idba_97	58068	No	NA	86	11	4	Complete	High-quality	100	DTR
DC23_idba_98	58034	No	NA	85	15	2	Complete	High-quality	100	DTR
DC23_idba_112	54380	No	NA	91	21	2	Complete	High-quality	100	DTR
DC23_idba_120	53070	No	NA	96	17	1	Complete	High-quality	100	DTR
DC23_idba_124	52128	No	NA	72	3	3	Complete	High-quality	100	DTR
DC23_idba_133	49819	No	NA	64	17	0	High-quality	High-quality	96.27	AAI-based
DC23_idba_135	49079	No	NA	64	12	1	Complete	High-quality	100	DTR
DC23_idba_136	48901	No	NA	73	21	0	High-quality	High-quality	99.93	AAI-based
DC23_idba_142	46924	No	NA	69	22	1	Complete	High-quality	100	DTR
DC23_idba_151	45551	No	NA	75	19	0	Complete	High-quality	100	DTR
DC23_idba_152	45420	No	NA	83	16	0	Complete	High-quality	100	DTR
DC23_idba_154	45247	No	NA	57	10	1	Complete	High-quality	100	DTR
DC23_idba_160	44766	No	NA	65	18	1	High-quality	High-quality	95.64	AAI-based
DC23_idba_161	44675	No	NA	75	18	1	High-quality	High-quality	100	AAI-based
DC23_idba_166	43868	No	NA	52	26	2	Complete	High-quality	100	DTR
DC23_idba_167	43843	No	NA	55	24	1	Complete	High-quality	100	DTR
DC23_idba_176	43063	No	NA	74	19	1	Complete	High-quality	100	DTR
DC23_idba_178	42808	No	NA	74	16	2	Complete	High-quality	100	DTR
DC23_idba_179	42803	No	NA	76	25	1	Complete	High-quality	100	DTR
DC23_idba_182	42575	No	NA	57	11	0	Complete	High-quality	100	DTR
DC23_idba_183	42467	No	NA	61	7	0	Complete	High-quality	100	DTR
DC23_idba_185	42046	No	NA	65	9	1	High-quality	High-quality	100	AAI-based
DC23_idba_186	42024	No	NA	62	28	1	Complete	High-quality	100	DTR
DC23_idba_187	41999	No	NA	66	18	0	High-quality	High-quality	99.19	AAI-based
DC23_idba_198	39838	No	NA	62	20	1	High-quality	High-quality	100	AAI-based
DC23_idba_205	39467	No	NA	44	9	1	High-quality	High-quality	99.38	AAI-based
DC23_idba_210	39024	No	NA	65	20	1	Complete	High-quality	100	DTR
DC23_idba_215	38495	No	NA	58	13	1	Complete	High-quality	100	DTR
DC23_idba_217	38327	No	NA	42	5	1	Complete	High-quality	100	DTR
DC23_idba_220	38043	No	NA	52	19	0	High-quality	High-quality	97.88	AAI-based
DC23_idba_226	37525	No	NA	65	19	0	Complete	High-quality	100	DTR
DC23_idba_241	36372	No	NA	47	14	0	High-quality	High-quality	92.66	AAI-based
DC23_idba_244	36307	No	NA	62	14	1	High-quality	High-quality	94.96	AAI-based
DC23_idba_247	36198	No	NA	50	16	1	Complete	High-quality	100	DTR
DC23_idba_258	35104	No	NA	53	24	0	High-quality	High-quality	99.55	AAI-based
DC23_idba_268	34441	No	NA	62	23	5	High-quality	High-quality	95.04	AAI-based
DC23_idba_289	32378	No	NA	52	18	1	High-quality	High-quality	100	AAI-based
DC23_idba_318	30171	No	NA	41	14	0	High-quality	High-quality	95.95	AAI-based
DC23_idba_354	28206	No	NA	48	12	1	High-quality	High-quality	90.3	AAI-based
DC23_idba_538	20046	No	NA	33	4	1	High-quality	High-quality	100	AAI-based
DC23_idba_835	13466	No	NA	18	5	0	High-quality	High-quality	98.31	AAI-based
DC23_idba_1664	5957	No	NA	7	4	0	High-quality	High-quality	97.65	AAI-based
DC25_idba_1	345341	No	NA	258	3	187	High-quality	High-quality	100	HMM-based
DC25_idba_2	212158	No	NA	307	45	10	High-quality	High-quality	100	AAI-based
DC25_idba_5	145716	No	NA	194	11	7	Complete	High-quality	100	DTR
DC25_idba_6	139808	No	NA	106	1	64	High-quality	High-quality	100	HMM-based
DC25_idba_25	85046	No	NA	109	12	2	Complete	High-quality	100	DTR
DC25_idba_53	60769	No	NA	105	20	2	High-quality	High-quality	100	AAI-based
DC25_idba_56	60261	No	NA	61	1	20	High-quality	High-quality	90.15	HMM-based
DC25_idba_87	48419	No	NA	56	8	0	High-quality	High-quality	98.02	AAI-based
DC25_idba_92	46937	No	NA	64	20	0	High-quality	High-quality	95.97	AAI-based
DC25_idba_96	46111	No	NA	45	8	2	High-quality	High-quality	100	AAI-based
DC25_idba_97	45884	No	NA	51	6	1	Complete	High-quality	100	DTR
DC25_idba_102	44341	No	NA	66	17	0	Complete	High-quality	100	DTR
DC25_idba_106	42994	No	NA	68	25	0	Complete	High-quality	100	DTR
DC25_idba_107	42987	No	NA	63	29	0	High-quality	High-quality	99.56	AAI-based
DC25_idba_109	42319	No	NA	81	16	0	High-quality	High-quality	100	AAI-based
DC25_idba_115	40664	No	NA	70	17	2	Complete	High-quality	100	DTR
DC25_idba_121	39580	No	NA	64	31	0	Complete	High-quality	100	DTR
DC25_idba_132	37635	No	NA	53	25	0	Complete	High-quality	100	DTR
DC25_idba_133	37528	No	NA	43	14	1	Complete	High-quality	100	ITR
DC25_idba_137	36194	No	NA	49	9	1	Complete	High-quality	100	DTR
DC25_idba_150	34425	No	NA	47	12	0	Complete	High-quality	100	DTR
DC25_idba_153	34213	No	NA	50	20	1	Complete	High-quality	100	DTR
DC26_idba_5	244744	No	NA	228	4	164	High-quality	High-quality	100	HMM-based
DC26_idba_6	243828	No	NA	192	1	112	High-quality	High-quality	100	HMM-based
DC26_idba_14	184456	No	NA	192	1	140	High-quality	High-quality	100	HMM-based
DC26_idba_17	161831	No	NA	204	41	2	Complete	High-quality	100	DTR
DC26_idba_18	158734	No	NA	138	5	76	High-quality	High-quality	100	HMM-based
DC26_idba_91	80457	No	NA	120	28	6	Complete	High-quality	100	DTR
DC26_idba_124	67924	No	NA	104	28	4	Complete	High-quality	100	DTR
DC26_idba_152	61065	No	NA	92	35	0	High-quality	High-quality	99.89	AAI-based
DC26_idba_176	55161	No	NA	91	14	2	High-quality	High-quality	95.64	AAI-based
DC26_idba_190	52895	No	NA	81	28	0	Complete	High-quality	100	DTR
DC26_idba_236	46557	Yes	35612	56	24	10	High-quality	High-quality	100	AAI-based
DC26_idba_237	46408	No	NA	73	12	1	Complete	High-quality	100	DTR
DC26_idba_245	45548	No	NA	69	17	0	Complete	High-quality	100	DTR
DC26_idba_259	44276	No	NA	82	15	2	Complete	High-quality	100	DTR
DC26_idba_265	43928	No	NA	72	25	0	Complete	High-quality	100	DTR
DC26_idba_274	43291	No	NA	68	26	0	Complete	High-quality	100	DTR
DC26_idba_279	42600	No	NA	67	7	0	Complete	High-quality	100	DTR
DC26_idba_282	42518	No	NA	56	19	0	Complete	High-quality	100	DTR
DC26_idba_285	42369	No	NA	67	17	1	Complete	High-quality	100	DTR
DC26_idba_294	41605	No	NA	56	21	1	Complete	High-quality	100	ITR
DC26_idba_299	41044	No	NA	50	8	0	Complete	High-quality	100	DTR
DC26_idba_300	41039	No	NA	50	27	1	Complete	High-quality	100	DTR
DC26_idba_301	41014	No	NA	55	19	0	High-quality	High-quality	99.39	AAI-based
DC26_idba_302	40942	No	NA	58	9	3	Complete	High-quality	100	DTR
DC26_idba_306	40638	No	NA	43	10	0	High-quality	High-quality	98.39	AAI-based
DC26_idba_308	40410	No	NA	81	19	0	Complete	High-quality	100	DTR
DC26_idba_312	40063	No	NA	70	25	0	Complete	High-quality	100	DTR
DC26_idba_315	39893	No	NA	64	25	1	Complete	High-quality	100	DTR
DC26_idba_320	39680	No	NA	59	18	0	Complete	High-quality	100	DTR
DC26_idba_326	38666	No	NA	59	22	0	Complete	High-quality	100	DTR
DC26_idba_328	38487	No	NA	48	9	0	Complete	High-quality	100	ITR
DC26_idba_330	38308	No	NA	62	18	3	High-quality	High-quality	100	AAI-based
DC26_idba_334	37922	No	NA	58	18	1	Complete	High-quality	100	DTR
DC26_idba_348	36770	No	NA	51	10	0	Complete	High-quality	100	DTR
DC26_idba_353	36457	No	NA	53	15	1	High-quality	High-quality	94.87	AAI-based
DC26_idba_358	36273	No	NA	59	13	2	Complete	High-quality	100	DTR
DC26_idba_361	36096	No	NA	40	4	0	Complete	High-quality	100	DTR
DC26_idba_368	35555	No	NA	53	11	0	High-quality	High-quality	93.85	AAI-based
DC26_idba_378	35003	No	NA	61	23	2	Complete	High-quality	100	DTR
DC26_idba_396	33771	No	NA	46	21	1	High-quality	High-quality	97.91	AAI-based
DC26_idba_398	33651	No	NA	46	13	0	Complete	High-quality	100	DTR
DC26_idba_429	31179	No	NA	57	19	1	Complete	High-quality	100	DTR
DC26_idba_430	31162	No	NA	45	13	1	Complete	High-quality	100	DTR
DC26_idba_485	28207	No	NA	45	16	0	Complete	High-quality	100	DTR
DC26_idba_492	27786	No	NA	45	18	0	Complete	High-quality	100	DTR
DC26_idba_803	18038	No	NA	29	8	0	High-quality	High-quality	100	AAI-based
DC26_idba_998	14433	No	NA	18	4	0	Complete	High-quality	100	ITR
DC26_idba_1319	10557	No	NA	20	3	0	Complete	High-quality	100	DTR
DC27_idba_2	210070	No	NA	167	6	110	High-quality	High-quality	100	HMM-based
DC27_idba_5	184814	No	NA	216	23	7	Complete	High-quality	100	DTR
DC27_idba_8	130729	No	NA	180	33	3	High-quality	High-quality	98.19	AAI-based
DC27_idba_14	118017	No	NA	137	30	6	Complete	High-quality	100	DTR
DC27_idba_21	103215	No	NA	95	19	1	Complete	High-quality	100	DTR
DC27_idba_23	100718	No	NA	103	15	1	High-quality	High-quality	99.27	AAI-based
DC27_idba_24	100644	No	NA	102	17	1	Complete	High-quality	100	DTR
DC27_idba_25	100448	No	NA	110	15	1	Complete	High-quality	100	DTR
DC27_idba_29	95852	No	NA	90	12	5	Complete	High-quality	100	DTR
DC27_idba_30	94261	No	NA	114	14	0	High-quality	High-quality	95.15	AAI-based
DC27_idba_38	75584	No	NA	109	16	1	High-quality	High-quality	90.23	AAI-based
DC27_idba_42	72515	No	NA	112	16	5	High-quality	High-quality	94.71	AAI-based
DC27_idba_46	71343	No	NA	107	18	1	Complete	High-quality	100	DTR
DC27_idba_50	70827	No	NA	105	16	2	High-quality	High-quality	100	AAI-based
DC27_idba_57	65893	No	NA	65	6	2	Complete	High-quality	100	DTR
DC27_idba_64	63563	No	NA	98	18	0	High-quality	High-quality	90.73	AAI-based
DC27_idba_65	62608	No	NA	101	22	1	Complete	High-quality	100	DTR
DC27_idba_71	60423	No	NA	92	35	2	High-quality	High-quality	99.16	AAI-based
DC27_idba_73	59537	No	NA	93	31	1	Complete	High-quality	100	DTR
DC27_idba_78	58615	No	NA	91	35	0	High-quality	High-quality	98.16	AAI-based
DC27_idba_79	58341	No	NA	85	15	2	Complete	High-quality	100	DTR
DC27_idba_82	57831	No	NA	72	15	4	Complete	High-quality	100	DTR
DC27_idba_87	56416	No	NA	89	21	2	High-quality	High-quality	100	AAI-based
DC27_idba_89	54018	No	NA	79	19	3	High-quality	High-quality	91.19	AAI-based
DC27_idba_92	53060	No	NA	96	18	1	Complete	High-quality	100	DTR
DC27_idba_96	52758	No	NA	90	20	0	High-quality	High-quality	98.47	AAI-based
DC27_idba_97	52757	Yes	48701	74	21	4	High-quality	High-quality	92.86	AAI-based
DC27_idba_108	49585	No	NA	92	21	0	Complete	High-quality	100	DTR
DC27_idba_109	49079	No	NA	64	12	1	Complete	High-quality	100	DTR
DC27_idba_110	49074	No	NA	73	21	0	High-quality	High-quality	100	AAI-based
DC27_idba_114	48419	No	NA	65	11	1	Complete	High-quality	100	DTR
DC27_idba_123	46740	No	NA	74	21	1	Complete	High-quality	100	DTR
DC27_idba_131	45927	No	NA	52	1	22	High-quality	High-quality	100	AAI-based
DC27_idba_135	45257	No	NA	57	10	1	Complete	High-quality	100	DTR
DC27_idba_138	45022	No	NA	69	33	0	High-quality	High-quality	98.76	AAI-based
DC27_idba_141	44872	No	NA	60	29	1	High-quality	High-quality	99.36	AAI-based
DC27_idba_144	44293	No	NA	64	19	0	Complete	High-quality	100	DTR
DC27_idba_146	44163	No	NA	86	16	1	Complete	High-quality	100	DTR
DC27_idba_150	43903	No	NA	56	24	1	Complete	High-quality	100	DTR
DC27_idba_152	43785	No	NA	69	13	1	High-quality	High-quality	100	AAI-based
DC27_idba_153	43700	No	NA	65	17	1	High-quality	High-quality	97.36	AAI-based
DC27_idba_154	43379	No	NA	56	10	0	Complete	High-quality	100	DTR
DC27_idba_155	43208	No	NA	46	5	2	High-quality	High-quality	100	AAI-based
DC27_idba_157	42803	No	NA	76	25	1	Complete	High-quality	100	DTR
DC27_idba_158	42635	No	NA	58	11	0	Complete	High-quality	100	DTR
DC27_idba_160	42487	No	NA	61	7	0	Complete	High-quality	100	DTR
DC27_idba_162	42250	No	NA	69	17	0	Complete	High-quality	100	DTR
DC27_idba_168	41232	No	NA	57	6	0	Complete	High-quality	100	DTR
DC27_idba_172	40895	No	NA	71	16	2	High-quality	High-quality	97	AAI-based
DC27_idba_175	40591	No	NA	66	24	2	Complete	High-quality	100	DTR
DC27_idba_178	40182	No	NA	60	29	0	Complete	High-quality	100	DTR
DC27_idba_180	40142	No	NA	52	31	0	Complete	High-quality	100	DTR
DC27_idba_189	39627	No	NA	52	6	2	High-quality	High-quality	92.7	AAI-based
DC27_idba_192	39064	No	NA	65	20	1	Complete	High-quality	100	DTR
DC27_idba_193	38927	No	NA	53	29	2	High-quality	High-quality	93.63	AAI-based
DC27_idba_194	38896	No	NA	47	25	1	Complete	High-quality	100	DTR
DC27_idba_196	38746	No	NA	47	10	0	Complete	High-quality	100	ITR
DC27_idba_200	38647	No	NA	51	6	1	Complete	High-quality	100	DTR
DC27_idba_203	38515	No	NA	58	14	1	Complete	High-quality	100	DTR
DC27_idba_205	38464	No	NA	59	9	1	High-quality	High-quality	94.37	AAI-based
DC27_idba_207	38303	No	NA	53	15	3	High-quality	High-quality	96.18	AAI-based
DC27_idba_217	37290	No	NA	47	9	1	Complete	High-quality	100	DTR
DC27_idba_222	36937	No	NA	41	12	0	Complete	High-quality	100	DTR
DC27_idba_230	36494	No	NA	57	23	0	Complete	High-quality	100	DTR
DC27_idba_233	36386	No	NA	65	26	3	High-quality	High-quality	100	AAI-based
DC27_idba_234	36132	No	NA	49	16	1	High-quality	High-quality	98.08	AAI-based
DC27_idba_235	36095	No	NA	57	18	0	Complete	High-quality	100	DTR
DC27_idba_243	35373	No	NA	50	3	0	Complete	High-quality	100	DTR
DC27_idba_248	35050	No	NA	62	24	5	High-quality	High-quality	99.47	AAI-based
DC27_idba_255	34707	No	NA	52	23	0	High-quality	High-quality	98.42	AAI-based
DC27_idba_258	34569	No	NA	40	5	2	Complete	High-quality	100	DTR
DC27_idba_260	34448	No	NA	56	22	0	Complete	High-quality	100	DTR
DC27_idba_263	34287	No	NA	61	15	1	High-quality	High-quality	100	AAI-based
DC27_idba_265	34239	No	NA	48	14	0	Complete	High-quality	100	DTR
DC27_idba_266	34180	No	NA	49	23	2	Complete	High-quality	100	DTR
DC27_idba_275	33580	No	NA	52	12	0	High-quality	High-quality	93.26	AAI-based
DC27_idba_280	33497	No	NA	48	13	0	High-quality	High-quality	93.59	AAI-based
DC27_idba_281	33450	No	NA	46	14	1	High-quality	High-quality	94.6	AAI-based
DC27_idba_294	32654	No	NA	52	19	1	High-quality	High-quality	100	AAI-based
DC27_idba_359	27947	No	NA	43	15	0	High-quality	High-quality	93.89	AAI-based
DC27_idba_385	26185	No	NA	36	14	0	Complete	High-quality	100	DTR
DC27_idba_901	13663	No	NA	18	5	0	Complete	High-quality	100	ITR
DC27_idba_952	12971	No	NA	19	3	1	Complete	High-quality	100	DTR
H01_idba_4	209426	No	NA	295	38	5	High-quality	High-quality	97.19	AAI-based
H01_idba_5	208533	No	NA	202	3	84	Complete	High-quality	100	ITR
H01_idba_6	182284	No	NA	143	2	80	High-quality	High-quality	100	HMM-based
H01_idba_8	175802	No	NA	158	1	117	High-quality	High-quality	100	HMM-based
H01_idba_12	151813	No	NA	149	6	59	High-quality	High-quality	98.59	HMM-based
H01_idba_13	149980	No	NA	137	6	72	High-quality	High-quality	100	HMM-based
H01_idba_62	83963	No	NA	122	38	1	Complete	High-quality	100	DTR
H01_idba_76	74767	No	NA	89	22	3	High-quality	High-quality	96.9	AAI-based
H01_idba_88	68113	No	NA	57	2	48	High-quality	High-quality	100	HMM-based
H01_idba_93	66716	No	NA	100	27	4	Complete	High-quality	100	DTR
H01_idba_103	65143	No	NA	64	6	3	Complete	High-quality	100	DTR
H01_idba_120	61934	No	NA	94	30	0	Complete	High-quality	100	DTR
H01_idba_121	61401	No	NA	74	14	1	High-quality	High-quality	100	AAI-based
H01_idba_126	60812	No	NA	78	18	0	High-quality	High-quality	100	AAI-based
H01_idba_131	59273	No	NA	82	31	1	High-quality	High-quality	100	AAI-based
H01_idba_140	57417	No	NA	89	26	0	Complete	High-quality	100	DTR
H01_idba_142	57124	No	NA	82	27	1	Complete	High-quality	100	DTR
H01_idba_152	55828	No	NA	90	19	1	High-quality	High-quality	100	AAI-based
H01_idba_161	53789	No	NA	93	26	0	Complete	High-quality	100	DTR
H01_idba_165	52957	No	NA	83	34	2	Complete	High-quality	100	DTR
H01_idba_176	49804	No	NA	62	18	0	High-quality	High-quality	100	AAI-based
H01_idba_179	49052	No	NA	86	28	1	Complete	High-quality	100	DTR
H01_idba_180	48327	No	NA	61	21	0	Complete	High-quality	100	DTR
H01_idba_183	47435	No	NA	82	38	0	Complete	High-quality	100	DTR
H01_idba_189	45531	No	NA	65	29	0	Complete	High-quality	100	DTR
H01_idba_198	45008	No	NA	62	29	0	Complete	High-quality	100	DTR
H01_idba_199	44928	No	NA	71	27	0	Complete	High-quality	100	DTR
H01_idba_203	44441	No	NA	64	6	2	Complete	High-quality	100	DTR
H01_idba_210	43933	No	NA	49	31	0	Complete	High-quality	100	DTR
H01_idba_217	43148	No	NA	60	17	2	High-quality	High-quality	100	AAI-based
H01_idba_219	42998	No	NA	45	5	2	High-quality	High-quality	100	AAI-based
H01_idba_220	42847	No	NA	64	7	0	Complete	High-quality	100	DTR
H01_idba_228	42009	No	NA	70	23	0	Complete	High-quality	100	DTR
H01_idba_229	41689	No	NA	64	13	0	High-quality	High-quality	98.48	AAI-based
H01_idba_230	41682	No	NA	59	21	1	Complete	High-quality	100	DTR
H01_idba_232	41374	No	NA	62	19	1	High-quality	High-quality	100	AAI-based
H01_idba_235	41343	No	NA	59	11	0	Complete	High-quality	100	DTR
H01_idba_242	40768	No	NA	53	3	1	Complete	High-quality	100	DTR
H01_idba_243	40638	Yes	38361	69	16	2	High-quality	High-quality	94.59	AAI-based
H01_idba_244	40635	No	NA	57	21	2	Complete	High-quality	100	DTR
H01_idba_246	40516	No	NA	54	18	0	High-quality	High-quality	100	AAI-based
H01_idba_254	40061	No	NA	65	31	2	Complete	High-quality	100	DTR
H01_idba_255	39899	No	NA	59	23	1	High-quality	High-quality	93.6	AAI-based
H01_idba_256	39869	No	NA	62	23	2	Complete	High-quality	100	DTR
H01_idba_261	39337	No	NA	51	22	0	High-quality	High-quality	91.47	AAI-based
H01_idba_262	39196	No	NA	58	21	0	Complete	High-quality	100	DTR
H01_idba_265	39101	No	NA	52	7	0	Complete	High-quality	100	DTR
H01_idba_268	38855	No	NA	58	18	0	Complete	High-quality	100	DTR
H01_idba_277	37825	No	NA	58	13	0	High-quality	High-quality	92.23	AAI-based
H01_idba_278	37765	No	NA	53	9	0	High-quality	High-quality	97.26	AAI-based
H01_idba_284	37251	No	NA	56	21	1	Complete	High-quality	100	DTR
H01_idba_287	37091	No	NA	63	21	0	Complete	High-quality	100	DTR
H01_idba_290	36768	No	NA	49	16	1	Complete	High-quality	100	DTR
H01_idba_296	36601	No	NA	52	13	0	Complete	High-quality	100	DTR
H01_idba_299	36502	No	NA	54	12	2	High-quality	High-quality	100	AAI-based
H01_idba_304	36300	No	NA	61	19	4	High-quality	High-quality	97.18	AAI-based
H01_idba_307	35956	No	NA	44	16	0	High-quality	High-quality	99.9	AAI-based
H01_idba_338	33962	No	NA	53	19	1	Complete	High-quality	100	DTR
H01_idba_341	33887	No	NA	59	15	0	High-quality	High-quality	94.78	AAI-based
H01_idba_342	33840	No	NA	54	23	1	Complete	High-quality	100	DTR
H01_idba_390	30668	No	NA	46	16	1	High-quality	High-quality	95.85	AAI-based
H01_idba_410	29661	No	NA	42	15	1	Complete	High-quality	100	DTR
H01_idba_1854	5874	No	NA	7	3	0	Complete	High-quality	100	DTR
H02_idba_5	72506	No	NA	110	22	3	Complete	High-quality	100	DTR
H02_idba_7	69672	No	NA	94	25	2	Complete	High-quality	100	DTR
H02_idba_11	57207	No	NA	82	15	2	High-quality	High-quality	92.88	AAI-based
H02_idba_20	45962	No	NA	55	7	4	High-quality	High-quality	100	AAI-based
H02_idba_21	45684	No	NA	80	21	0	Complete	High-quality	100	DTR
H02_idba_23	45307	No	NA	75	28	0	Complete	High-quality	100	DTR
H02_idba_24	45052	No	NA	57	24	2	High-quality	High-quality	95.28	AAI-based
H02_idba_27	42831	No	NA	71	17	0	Complete	High-quality	100	DTR
H02_idba_33	41168	No	NA	66	21	0	High-quality	High-quality	100	AAI-based
H02_idba_34	40924	No	NA	57	20	0	Complete	High-quality	100	DTR
H02_idba_39	38102	No	NA	50	20	2	High-quality	High-quality	94	AAI-based
H02_idba_40	38085	No	NA	53	9	1	Complete	High-quality	100	DTR
H02_idba_46	36701	No	NA	54	26	0	High-quality	High-quality	96.36	AAI-based
H02_idba_65	31106	No	NA	47	13	0	Complete	High-quality	100	ITR
H02_idba_85	26472	No	NA	32	9	0	High-quality	High-quality	91.76	AAI-based
H03_idba_1	159017	No	NA	203	40	3	Complete	High-quality	100	DTR
H03_idba_2	157570	No	NA	156	7	74	High-quality	High-quality	100	HMM-based
H03_idba_7	96262	No	NA	124	19	3	Complete	High-quality	100	DTR
H03_idba_15	78739	No	NA	94	15	0	High-quality	High-quality	96.03	AAI-based
H03_idba_27	69153	No	NA	105	28	0	High-quality	High-quality	100	AAI-based
H03_idba_32	65675	No	NA	67	13	2	High-quality	High-quality	100	AAI-based
H03_idba_40	62057	No	NA	81	32	1	Complete	High-quality	100	DTR
H03_idba_44	59981	No	NA	95	32	0	Complete	High-quality	100	DTR
H03_idba_51	54808	No	NA	94	16	2	High-quality	High-quality	95.05	AAI-based
H03_idba_58	52471	No	NA	78	26	1	Complete	High-quality	100	ITR
H03_idba_63	50326	No	NA	82	23	1	Complete	High-quality	100	DTR
H03_idba_66	49287	No	NA	77	21	1	High-quality	High-quality	100	AAI-based
H03_idba_68	48997	No	NA	73	21	0	High-quality	High-quality	100	AAI-based
H03_idba_71	47742	No	NA	68	18	0	High-quality	High-quality	90.52	AAI-based
H03_idba_72	47152	No	NA	67	22	0	High-quality	High-quality	91.19	AAI-based
H03_idba_77	45304	No	NA	59	18	0	Complete	High-quality	100	DTR
H03_idba_82	43767	No	NA	72	15	1	High-quality	High-quality	99.15	AAI-based
H03_idba_83	42744	No	NA	61	14	0	High-quality	High-quality	92.5	AAI-based
H03_idba_86	42420	No	NA	61	17	2	Complete	High-quality	100	DTR
H03_idba_87	42316	No	NA	60	9	2	Complete	High-quality	100	DTR
H03_idba_89	42231	No	NA	50	7	1	Complete	High-quality	100	DTR
H03_idba_90	42056	No	NA	70	14	1	Complete	High-quality	100	DTR
H03_idba_91	42018	No	NA	45	10	1	Complete	High-quality	100	DTR
H03_idba_94	41421	No	NA	67	26	2	Complete	High-quality	100	ITR
H03_idba_98	39912	No	NA	54	17	0	Complete	High-quality	100	DTR
H03_idba_106	38410	No	NA	67	12	1	Complete	High-quality	100	DTR
H03_idba_107	38378	No	NA	66	13	0	High-quality	High-quality	91.93	AAI-based
H03_idba_109	38203	No	NA	61	23	1	Complete	High-quality	100	DTR
H03_idba_115	37492	No	NA	65	18	1	Complete	High-quality	100	DTR
H03_idba_119	36711	No	NA	62	9	0	Complete	High-quality	100	DTR
H03_idba_123	36054	No	NA	52	13	0	High-quality	High-quality	100	AAI-based
H03_idba_129	34686	No	NA	58	19	1	Complete	High-quality	100	DTR
H03_idba_132	34180	No	NA	51	10	1	High-quality	High-quality	92.85	AAI-based
H03_idba_134	33962	No	NA	55	20	1	Complete	High-quality	100	DTR
H03_idba_136	33948	No	NA	56	14	2	High-quality	High-quality	99.42	AAI-based
H03_idba_137	33846	No	NA	58	25	1	Complete	High-quality	100	DTR
H03_idba_159	32270	No	NA	51	19	2	High-quality	High-quality	97.1	AAI-based
H03_idba_163	31640	No	NA	51	19	2	Complete	High-quality	100	DTR
H03_idba_169	31119	No	NA	51	16	1	Complete	High-quality	100	DTR
H03_idba_185	29486	No	NA	51	22	2	Complete	High-quality	100	DTR
H04_idba_1	173186	No	NA	196	28	4	Complete	High-quality	100	DTR
H04_idba_4	153190	No	NA	143	1	87	High-quality	High-quality	100	HMM-based
H04_idba_6	128645	No	NA	181	34	3	High-quality	High-quality	95.14	AAI-based
H04_idba_8	123220	No	NA	162	30	2	High-quality	High-quality	92.75	AAI-based
H04_idba_10	122685	No	NA	152	37	4	Complete	High-quality	100	DTR
H04_idba_16	91954	No	NA	138	34	3	Complete	High-quality	100	DTR
H04_idba_18	87324	No	NA	111	14	2	Complete	High-quality	100	DTR
H04_idba_20	84473	No	NA	111	13	1	High-quality	High-quality	97.52	AAI-based
H04_idba_35	62081	No	NA	90	36	1	High-quality	High-quality	100	AAI-based
H04_idba_48	54277	No	NA	89	22	0	Complete	High-quality	100	DTR
H04_idba_53	53362	No	NA	83	19	2	High-quality	High-quality	97.17	AAI-based
H04_idba_54	52947	No	NA	72	31	2	Complete	High-quality	100	DTR
H04_idba_57	51415	No	NA	69	19	0	Complete	High-quality	100	DTR
H04_idba_64	45795	No	NA	69	12	1	Complete	High-quality	100	DTR
H04_idba_65	45499	No	NA	66	33	0	Complete	High-quality	100	DTR
H04_idba_66	45432	No	NA	80	24	0	Complete	High-quality	100	DTR
H04_idba_68	45195	No	NA	67	24	2	Complete	High-quality	100	DTR
H04_idba_69	45001	No	NA	50	4	2	High-quality	High-quality	97.96	AAI-based
H04_idba_70	44766	No	NA	67	29	0	High-quality	High-quality	100	AAI-based
H04_idba_71	44741	No	NA	71	25	0	Complete	High-quality	100	DTR
H04_idba_77	44154	No	NA	75	24	1	Complete	High-quality	100	DTR
H04_idba_78	43963	No	NA	56	25	1	Complete	High-quality	100	DTR
H04_idba_79	43732	No	NA	67	18	1	High-quality	High-quality	98.72	AAI-based
H04_idba_80	43682	No	NA	79	14	2	Complete	High-quality	100	DTR
H04_idba_81	43680	No	NA	82	18	1	Complete	High-quality	100	DTR
H04_idba_82	43632	No	NA	57	7	1	Complete	High-quality	100	DTR
H04_idba_84	43231	No	NA	70	17	1	Complete	High-quality	100	DTR
H04_idba_88	42592	No	NA	74	20	0	Complete	High-quality	100	DTR
H04_idba_89	42496	No	NA	56	11	0	Complete	High-quality	100	DTR
H04_idba_94	41980	No	NA	70	25	2	Complete	High-quality	100	ITR
H04_idba_95	41793	No	NA	55	7	0	Complete	High-quality	100	DTR
H04_idba_96	41719	No	NA	54	12	1	High-quality	High-quality	97.74	AAI-based
H04_idba_103	41125	No	NA	60	10	2	High-quality	High-quality	97.44	AAI-based
H04_idba_106	40612	No	NA	56	8	0	Complete	High-quality	100	DTR
H04_idba_108	40293	No	NA	52	30	0	Complete	High-quality	100	DTR
H04_idba_113	39756	No	NA	66	19	1	Complete	High-quality	100	DTR
H04_idba_115	39530	No	NA	49	10	1	Complete	High-quality	100	DTR
H04_idba_116	39514	No	NA	69	21	0	Complete	High-quality	100	DTR
H04_idba_122	38515	No	NA	53	29	0	High-quality	High-quality	93.71	AAI-based
H04_idba_124	38246	No	NA	66	21	0	Complete	High-quality	100	DTR
H04_idba_125	38136	No	NA	60	11	0	High-quality	High-quality	98.43	AAI-based
H04_idba_127	38062	No	NA	60	23	0	High-quality	High-quality	98.2	AAI-based
H04_idba_128	38003	No	NA	70	15	0	High-quality	High-quality	92.21	AAI-based
H04_idba_129	37988	No	NA	59	21	1	Complete	High-quality	100	DTR
H04_idba_130	37942	No	NA	67	35	0	Complete	High-quality	100	DTR
H04_idba_131	37799	No	NA	60	35	0	High-quality	High-quality	100	AAI-based
H04_idba_132	37739	No	NA	60	18	0	High-quality	High-quality	93.92	AAI-based
H04_idba_134	37526	No	NA	62	9	0	Complete	High-quality	100	DTR
H04_idba_138	37344	No	NA	56	10	3	High-quality	High-quality	100	AAI-based
H04_idba_139	37196	No	NA	41	5	1	High-quality	High-quality	97.03	AAI-based
H04_idba_142	36736	No	NA	53	16	2	Complete	High-quality	100	DTR
H04_idba_144	36674	No	NA	64	18	0	Complete	High-quality	100	DTR
H04_idba_145	36648	No	NA	61	18	1	High-quality	High-quality	100	AAI-based
H04_idba_148	36226	No	NA	41	6	0	Complete	High-quality	100	DTR
H04_idba_149	35935	No	NA	58	8	2	Complete	High-quality	100	DTR
H04_idba_150	35366	No	NA	45	25	1	Complete	High-quality	100	DTR
H04_idba_157	34582	Yes	32629	65	22	2	High-quality	High-quality	93.1	AAI-based
H04_idba_159	34459	No	NA	56	20	1	Complete	High-quality	100	DTR
H04_idba_160	34446	No	NA	53	15	2	Complete	High-quality	100	DTR
H04_idba_169	33754	No	NA	50	15	0	High-quality	High-quality	95.8	AAI-based
H04_idba_186	31344	No	NA	53	21	0	Complete	High-quality	100	ITR
H04_idba_188	31209	No	NA	54	15	0	High-quality	High-quality	97.13	AAI-based
H04_idba_192	30350	No	NA	44	15	0	Complete	High-quality	100	DTR
H04_idba_416	16957	No	NA	23	7	0	Complete	High-quality	100	ITR
H04_idba_465	15429	No	NA	20	7	0	Complete	High-quality	100	ITR
H04_idba_601	12925	No	NA	19	5	0	Complete	High-quality	100	ITR
H04_idba_630	12474	No	NA	17	4	0	Complete	High-quality	100	ITR
H04_idba_1291	6494	No	NA	7	4	0	High-quality	High-quality	95.14	AAI-based
H04_idba_1491	5554	No	NA	8	2	0	Complete	High-quality	100	DTR
H11_idba_1	376430	No	NA	332	4	255	High-quality	High-quality	100	HMM-based
H11_idba_3	220439	No	NA	214	1	177	High-quality	High-quality	100	HMM-based
H11_idba_4	206532	No	NA	203	1	131	High-quality	High-quality	100	HMM-based
H11_idba_5	184316	No	NA	291	40	2	High-quality	High-quality	100	AAI-based
H11_idba_15	169524	No	NA	152	5	89	High-quality	High-quality	100	HMM-based
H11_idba_19	156140	No	NA	239	40	4	Complete	High-quality	100	DTR
H11_idba_23	141844	No	NA	128	2	71	High-quality	High-quality	97.92	HMM-based
H11_idba_34	103469	No	NA	103	1	57	High-quality	High-quality	100	HMM-based
H11_idba_40	97806	No	NA	101	15	1	Complete	High-quality	100	DTR
H11_idba_42	97032	No	NA	99	15	2	Complete	High-quality	100	DTR
H11_idba_44	96752	No	NA	105	13	0	High-quality	High-quality	98.15	AAI-based
H11_idba_45	96169	No	NA	81	7	0	Complete	High-quality	100	DTR
H11_idba_61	85300	No	NA	112	13	2	Complete	High-quality	100	DTR
H11_idba_64	84653	No	NA	144	19	2	Complete	High-quality	100	DTR
H11_idba_66	83600	No	NA	73	1	45	High-quality	High-quality	100	HMM-based
H11_idba_111	61468	No	NA	94	33	0	High-quality	High-quality	100	AAI-based
H11_idba_115	61023	No	NA	91	19	2	High-quality	High-quality	100	AAI-based
H11_idba_120	60551	No	NA	102	18	0	Complete	High-quality	100	DTR
H11_idba_132	57720	Yes	41735	63	15	15	High-quality	High-quality	96.29	AAI-based
H11_idba_136	55937	No	NA	95	18	0	Complete	High-quality	100	DTR
H11_idba_140	55615	No	NA	91	20	2	Complete	High-quality	100	DTR
H11_idba_156	52933	No	NA	81	28	0	Complete	High-quality	100	DTR
H11_idba_158	52872	No	NA	74	20	1	High-quality	High-quality	100	AAI-based
H11_idba_160	52654	No	NA	77	29	1	High-quality	High-quality	100	AAI-based
H11_idba_162	51890	No	NA	69	12	1	Complete	High-quality	100	DTR
H11_idba_184	48202	No	NA	87	25	1	High-quality	High-quality	100	AAI-based
H11_idba_196	45934	No	NA	50	25	0	Complete	High-quality	100	DTR
H11_idba_211	43567	No	NA	78	17	0	High-quality	High-quality	95.99	AAI-based
H11_idba_220	42516	No	NA	75	15	0	Complete	High-quality	100	DTR
H11_idba_225	42158	No	NA	54	14	0	Complete	High-quality	100	DTR
H11_idba_230	41571	No	NA	72	16	1	High-quality	High-quality	96.34	AAI-based
H11_idba_235	40992	No	NA	69	17	1	High-quality	High-quality	97.02	AAI-based
H11_idba_256	37950	Yes	34428	54	20	5	High-quality	High-quality	98.49	AAI-based
H11_idba_262	37594	No	NA	54	31	0	Complete	High-quality	100	DTR
H11_idba_273	36584	No	NA	47	10	1	Complete	High-quality	100	DTR
H11_idba_276	36433	No	NA	53	20	0	High-quality	High-quality	100	AAI-based
H11_idba_290	35079	No	NA	53	14	1	High-quality	High-quality	100	AAI-based
H11_idba_295	34622	No	NA	49	13	0	High-quality	High-quality	96.73	AAI-based
H11_idba_301	34210	No	NA	62	22	2	High-quality	High-quality	100	AAI-based
H11_idba_303	33833	No	NA	51	7	0	Complete	High-quality	100	DTR
H11_idba_309	33363	No	NA	60	23	5	High-quality	High-quality	92.06	AAI-based
H11_idba_316	32932	No	NA	56	17	1	Complete	High-quality	100	DTR
H11_idba_321	32637	No	NA	50	19	1	Complete	High-quality	100	DTR
H11_idba_342	30746	No	NA	43	22	1	Complete	High-quality	100	DTR
H11_idba_350	30461	No	NA	41	12	0	High-quality	High-quality	91.95	AAI-based
H11_idba_451	26014	No	NA	29	0	13	High-quality	High-quality	100	AAI-based						genes	detected	idba	NGS
H12_idba_3	345015	No	NA	290	1	154	High-quality	High-quality	100	HMM-based
H12_idba_6	184898	No	NA	217	25	7	High-quality	High-quality	100	AAI-based
H12_idba_7	170852	No	NA	189	24	4	Complete	High-quality	100	DTR
H12_idba_12	132072	No	NA	210	24	3	Complete	High-quality	100	DTR
H12_idba_20	114735	No	NA	157	20	4	Complete	High-quality	100	DTR
H12_idba_23	105347	No	NA	127	18	4	Complete	High-quality	100	DTR
H12_idba_25	102430	No	NA	89	14	1	Complete	High-quality	100	DTR
H12_idba_26	100445	No	NA	110	24	0	Complete	High-quality	100	DTR
H12_idba_33	91943	No	NA	86	11	0	Complete	High-quality	100	DTR
H12_idba_36	85793	No	NA	113	15	1	Complete	High-quality	100	DTR
H12_idba_48	74088	No	NA	125	25	2	High-quality	High-quality	91.9	AAI-based
H12_idba_55	65187	No	NA	101	30	4	Complete	High-quality	100	DTR
H12_idba_56	65126	No	NA	60	6	3	High-quality	High-quality	99.48	AAI-based
H12_idba_65	62183	No	NA	105	14	2	Complete	High-quality	100	DTR
H12_idba_70	60639	No	NA	100	23	1	High-quality	High-quality	97.32	AAI-based
H12_idba_72	59666	No	NA	87	14	2	High-quality	High-quality	94.72	AAI-based
H12_idba_74	58757	No	NA	87	36	1	Complete	High-quality	100	DTR
H12_idba_83	55293	No	NA	76	12	4	Complete	High-quality	100	DTR
H12_idba_85	53492	Yes	44608	57	9	6	High-quality	High-quality	94.21	AAI-based
H12_idba_87	53100	No	NA	80	36	1	Complete	High-quality	100	DTR
H12_idba_89	52007	No	NA	93	18	1	Complete	High-quality	100	DTR
H12_idba_90	51636	No	NA	87	25	1	Complete	High-quality	100	DTR
H12_idba_92	50825	No	NA	94	16	2	Complete	High-quality	100	DTR
H12_idba_93	50252	No	NA	78	22	0	Complete	High-quality	100	DTR
H12_idba_95	49784	No	NA	68	18	0	High-quality	High-quality	99.35	AAI-based
H12_idba_97	49310	No	NA	90	19	0	Complete	High-quality	100	DTR
H12_idba_105	46576	No	NA	61	11	1	Complete	High-quality	100	DTR
H12_idba_107	46001	No	NA	53	25	3	High-quality	High-quality	97.4	AAI-based
H12_idba_108	45244	No	NA	70	16	1	Complete	High-quality	100	DTR
H12_idba_116	44101	No	NA	66	22	0	High-quality	High-quality	96.85	AAI-based
H12_idba_117	43838	No	NA	57	36	0	Complete	High-quality	100	DTR
H12_idba_124	42856	No	NA	53	7	1	High-quality	High-quality	96.95	AAI-based
H12_idba_127	42399	No	NA	77	16	1	Complete	High-quality	100	DTR
H12_idba_128	42122	No	NA	68	16	0	High-quality	High-quality	98.17	AAI-based
H12_idba_133	40205	No	NA	57	8	0	Complete	High-quality	100	DTR
H12_idba_141	39206	No	NA	58	22	0	Complete	High-quality	100	DTR
H12_idba_142	39113	No	NA	59	14	0	High-quality	High-quality	100	AAI-based
H12_idba_144	38882	No	NA	66	24	1	High-quality	High-quality	100	AAI-based
H12_idba_145	38848	No	NA	54	15	0	High-quality	High-quality	97.6	AAI-based
H12_idba_146	38745	No	NA	59	18	1	High-quality	High-quality	100	AAI-based
H12_idba_156	37512	No	NA	65	16	2	Complete	High-quality	100	DTR
H12_idba_157	37442	No	NA	51	8	0	Complete	High-quality	100	DTR
H12_idba_158	37210	No	NA	71	20	0	Complete	High-quality	100	DTR
H12_idba_166	36307	No	NA	61	21	0	Complete	High-quality	100	DTR
H12_idba_167	36280	No	NA	56	15	0	Complete	High-quality	100	DTR
H12_idba_169	36003	No	NA	60	21	0	High-quality	High-quality	90.18	AAI-based
H12_idba_172	35973	No	NA	54	16	2	High-quality	High-quality	100	AAI-based
H12_idba_173	35846	No	NA	48	14	1	High-quality	High-quality	91.32	AAI-based
H12_idba_177	34927	No	NA	63	18	0	Complete	High-quality	100	DTR
H12_idba_178	34917	No	NA	53	13	1	High-quality	High-quality	100	AAI-based
H12_idba_188	33192	No	NA	59	22	1	Complete	High-quality	100	DTR
H12_idba_208	30368	No	NA	51	20	0	Complete	High-quality	100	DTR
H12_idba_217	29402	No	NA	41	17	0	Complete	High-quality	100	DTR
H12_idba_339	20256	No	NA	35	4	1	Complete	High-quality	100	DTR
H12_idba_368	18435	No	NA	25	7	0	Complete	High-quality	100	ITR
H12_idba_491	13611	No	NA	18	7	0	High-quality	High-quality	98	AAI-based
H13_idba_3	318740	No	NA	290	4	179	High-quality	High-quality	100	HMM-based
H13_idba_5	272333	No	NA	226	5	134	High-quality	High-quality	100	HMM-based
H13_idba_9	231541	No	NA	181	3	134	High-quality	High-quality	100	HMM-based
H13_idba_13	212109	No	NA	298	40	7	Complete	High-quality	100	DTR
H13_idba_24	157924	No	NA	215	30	5	Complete	High-quality	100	DTR
H13_idba_29	146631	No	NA	226	33	3	Complete	High-quality	100	DTR
H13_idba_39	123036	No	NA	93	2	57	High-quality	High-quality	100	HMM-based
H13_idba_56	104336	No	NA	83	1	53	High-quality	High-quality	100	HMM-based
H13_idba_119	68111	No	NA	89	25	2	Complete	High-quality	100	DTR
H13_idba_130	64262	No	NA	111	23	1	Complete	High-quality	100	DTR
H13_idba_136	62674	No	NA	88	13	1	Complete	High-quality	100	DTR
H13_idba_143	61362	No	NA	92	22	2	Complete	High-quality	100	DTR
H13_idba_150	59780	No	NA	85	33	2	Complete	High-quality	100	DTR
H13_idba_170	56026	No	NA	86	21	1	Complete	High-quality	100	DTR
H13_idba_178	52067	No	NA	81	22	1	Complete	High-quality	100	DTR
H13_idba_179	52033	No	NA	81	32	1	Complete	High-quality	100	DTR
H13_idba_182	50733	No	NA	35	2	21	High-quality	High-quality	90.66	HMM-based
H13_idba_184	50620	No	NA	81	34	1	Complete	High-quality	100	DTR
H13_idba_189	50036	No	NA	89	16	1	High-quality	High-quality	98.01	AAI-based
H13_idba_193	49857	No	NA	82	21	0	Complete	High-quality	100	DTR
H13_idba_221	45484	No	NA	64	29	0	High-quality	High-quality	99.27	AAI-based
H13_idba_233	43983	No	NA	68	28	1	Complete	High-quality	100	DTR
H13_idba_238	43392	No	NA	76	16	0	High-quality	High-quality	92.99	AAI-based
H13_idba_239	43314	Yes	36618	63	20	3	High-quality	High-quality	100	AAI-based
H13_idba_249	42692	No	NA	54	6	0	Complete	High-quality	100	DTR
H13_idba_250	42679	No	NA	68	17	1	Complete	High-quality	100	DTR
H13_idba_253	42211	No	NA	57	29	1	Complete	High-quality	100	DTR
H13_idba_255	41910	Yes	37290	63	23	3	Complete	High-quality	100	DTR
H13_idba_257	41778	No	NA	67	20	1	Complete	High-quality	100	DTR
H13_idba_260	41647	No	NA	63	17	0	Complete	High-quality	100	DTR
H13_idba_262	41286	No	NA	56	20	1	Complete	High-quality	100	DTR
H13_idba_265	41198	No	NA	64	24	1	High-quality	High-quality	100	AAI-based
H13_idba_267	40927	No	NA	54	26	1	High-quality	High-quality	100	AAI-based
H13_idba_269	40752	No	NA	65	20	0	Complete	High-quality	100	DTR
H13_idba_280	40003	No	NA	51	26	0	Complete	High-quality	100	DTR
H13_idba_284	39835	No	NA	66	18	0	High-quality	High-quality	93.14	AAI-based
H13_idba_289	38993	No	NA	60	23	0	Complete	High-quality	100	DTR
H13_idba_297	38539	No	NA	54	8	1	Complete	High-quality	100	DTR
H13_idba_300	38351	No	NA	63	32	0	Complete	High-quality	100	DTR
H13_idba_306	37641	No	NA	59	17	0	Complete	High-quality	100	DTR
H13_idba_308	37375	No	NA	59	18	1	Complete	High-quality	100	DTR
H13_idba_316	36757	No	NA	58	18	1	Complete	High-quality	100	DTR
H13_idba_322	36574	No	NA	58	11	2	Complete	High-quality	100	ITR
H13_idba_325	36406	No	NA	50	16	1	High-quality	High-quality	94.87	AAI-based
H13_idba_326	36231	No	NA	55	14	2	Complete	High-quality	100	DTR
H13_idba_327	36190	No	NA	49	8	1	High-quality	High-quality	95.78	AAI-based
H13_idba_330	36080	No	NA	52	20	1	Complete	High-quality	100	DTR
H13_idba_331	36000	No	NA	48	21	0	Complete	High-quality	100	DTR
H13_idba_338	35543	No	NA	50	17	1	High-quality	High-quality	99.25	AAI-based
H13_idba_339	35492	No	NA	47	18	0	Complete	High-quality	100	DTR
H13_idba_345	35106	No	NA	60	12	2	High-quality	High-quality	98.27	AAI-based
H13_idba_356	34094	No	NA	56	22	2	High-quality	High-quality	100	AAI-based
H13_idba_385	31993	Yes	28432	51	17	2	Complete	High-quality	100	DTR
H13_idba_386	31908	No	NA	40	10	1	Complete	High-quality	100	DTR
H13_idba_396	31229	No	NA	42	14	0	Complete	High-quality	100	ITR
H13_idba_398	31053	No	NA	43	20	1	Complete	High-quality	100	DTR
H13_idba_427	29074	No	NA	40	14	0	Complete	High-quality	100	DTR
H16_idba_3	179459	No	NA	260	44	2	Complete	High-quality	100	DTR
H16_idba_7	151746	No	NA	161	4	85	High-quality	High-quality	97.96	HMM-based
H16_idba_10	136574	No	NA	116	5	72	High-quality	High-quality	97.6	HMM-based
H16_idba_45	61925	No	NA	91	33	1	Complete	High-quality	100	DTR
H16_idba_80	43248	No	NA	59	17	2	Complete	High-quality	100	DTR
H16_idba_81	42728	No	NA	61	24	0	Complete	High-quality	100	DTR
H16_idba_83	42225	No	NA	75	28	0	High-quality	High-quality	96.08	AAI-based
H16_idba_84	41209	No	NA	40	3	16	High-quality	High-quality	100	AAI-based
H16_idba_89	40765	No	NA	53	23	0	High-quality	High-quality	100	AAI-based
H16_idba_99	39999	No	NA	57	28	0	High-quality	High-quality	90.59	AAI-based
H16_idba_112	37766	No	NA	61	15	0	Complete	High-quality	100	DTR
H16_idba_115	37447	No	NA	59	22	0	Complete	High-quality	100	DTR
H16_idba_121	35701	No	NA	49	21	0	High-quality	High-quality	97.02	AAI-based
H16_idba_122	35650	No	NA	45	14	0	Complete	High-quality	100	DTR
H16_idba_124	35536	No	NA	45	21	0	Complete	High-quality	100	DTR
H16_idba_126	35230	No	NA	55	20	4	High-quality	High-quality	95.14	AAI-based
H16_idba_128	35050	No	NA	51	16	0	Complete	High-quality	100	DTR
H16_idba_129	34922	No	NA	33	5	0	High-quality	High-quality	91.46	AAI-based
H16_idba_131	34427	No	NA	53	17	3	Complete	High-quality	100	DTR
H16_idba_140	33539	No	NA	40	6	0	Complete	High-quality	100	DTR
H16_idba_157	30808	No	NA	48	17	2	High-quality	High-quality	93.08	AAI-based
H16_idba_479	12372	No	NA	17	4	0	High-quality	High-quality	96.69	AAI-based
H19_idba_4	101170	No	NA	99	14	1	Complete	High-quality	100	DTR
H19_idba_7	94969	Yes	86657	92	12	6	Complete	High-quality	100	DTR
H19_idba_9	92794	No	NA	138	34	3	Complete	High-quality	100	DTR
H19_idba_10	91847	No	NA	130	35	2	Complete	High-quality	100	DTR
H19_idba_15	73869	No	NA	69	0	36	High-quality	High-quality	100	AAI-based						genes	detected	idba	NGS
H19_idba_22	69369	No	NA	76	6	0	Complete	High-quality	100	DTR
H19_idba_27	62430	No	NA	81	17	0	Complete	High-quality	100	DTR
H19_idba_30	60634	No	NA	78	32	0	High-quality	High-quality	97.62	AAI-based
H19_idba_31	60111	No	NA	90	15	3	Complete	High-quality	100	DTR
H19_idba_32	60082	No	NA	107	19	2	Complete	High-quality	100	DTR
H19_idba_42	51886	No	NA	82	26	0	High-quality	High-quality	100	AAI-based
H19_idba_55	46839	No	NA	86	17	0	Complete	High-quality	100	DTR
H19_idba_56	46044	No	NA	73	12	1	High-quality	High-quality	100	AAI-based
H19_idba_62	44760	No	NA	75	14	0	Complete	High-quality	100	DTR
H19_idba_65	44309	No	NA	53	7	1	Complete	High-quality	100	DTR
H19_idba_67	44205	No	NA	55	7	1	Complete	High-quality	100	DTR
H19_idba_72	43392	No	NA	65	16	1	High-quality	High-quality	96.55	AAI-based
H19_idba_78	42279	No	NA	61	45	0	High-quality	High-quality	100	AAI-based
H19_idba_79	42034	No	NA	78	21	1	Complete	High-quality	100	DTR
H19_idba_91	40167	No	NA	61	47	0	Complete	High-quality	100	DTR
H19_idba_93	40090	No	NA	57	19	1	Complete	High-quality	100	DTR
H19_idba_94	39985	No	NA	70	13	3	High-quality	High-quality	100	AAI-based
H19_idba_96	39940	No	NA	57	21	3	Complete	High-quality	100	DTR
H19_idba_102	37794	No	NA	59	21	1	Complete	High-quality	100	DTR
H19_idba_103	37747	No	NA	45	20	0	Complete	High-quality	100	DTR
H19_idba_130	33310	No	NA	54	17	0	High-quality	High-quality	96.82	AAI-based
H19_idba_301	18350	No	NA	22	8	0	Complete	High-quality	100	ITR
H22_idba_3	186644	No	NA	158	5	91	High-quality	High-quality	100	HMM-based
H22_idba_9	106926	No	NA	142	21	4	Complete	High-quality	100	DTR
H22_idba_12	89467	No	NA	118	19	2	High-quality	High-quality	97.51	AAI-based
H22_idba_14	70872	No	NA	102	16	3	Complete	High-quality	100	DTR
H22_idba_16	60690	No	NA	80	16	3	Complete	High-quality	100	DTR
H22_idba_17	56873	No	NA	80	14	3	Complete	High-quality	100	DTR
H22_idba_22	53959	No	NA	91	16	2	High-quality	High-quality	93.61	AAI-based
H22_idba_23	52766	No	NA	91	16	1	Complete	High-quality	100	DTR
H22_idba_24	52616	No	NA	80	13	3	Complete	High-quality	100	DTR
H22_idba_25	51011	No	NA	61	3	4	High-quality	High-quality	93.36	AAI-based
H22_idba_26	49984	No	NA	92	20	0	High-quality	High-quality	98.61	AAI-based
H22_idba_32	44121	No	NA	80	14	2	Complete	High-quality	100	DTR
H22_idba_33	43613	No	NA	55	8	1	High-quality	High-quality	96.51	AAI-based
H22_idba_35	42510	No	NA	57	24	1	Complete	High-quality	100	DTR
H22_idba_37	42184	No	NA	65	18	1	Complete	High-quality	100	DTR
H22_idba_39	41517	No	NA	56	8	0	Complete	High-quality	100	DTR
H22_idba_40	41367	No	NA	62	22	1	Complete	High-quality	100	DTR
H22_idba_41	41350	No	NA	72	15	0	Complete	High-quality	100	DTR
H22_idba_42	40164	No	NA	61	24	3	Complete	High-quality	100	DTR
H22_idba_43	39629	No	NA	37	8	1	High-quality	High-quality	92.52	AAI-based
H22_idba_46	38823	No	NA	53	8	0	Complete	High-quality	100	DTR
H22_idba_47	38789	No	NA	68	13	0	Complete	High-quality	100	DTR
H22_idba_49	38209	No	NA	64	21	3	Complete	High-quality	100	DTR
H22_idba_50	38039	No	NA	43	10	0	High-quality	High-quality	92.1	AAI-based
H22_idba_54	35703	No	NA	58	17	0	Complete	High-quality	100	DTR
H22_idba_56	35256	No	NA	51	13	0	High-quality	High-quality	98.5	AAI-based
H22_idba_57	34376	No	NA	49	12	0	Complete	High-quality	100	DTR
H22_idba_61	32117	No	NA	46	22	2	Complete	High-quality	100	DTR
H22_idba_67	29445	No	NA	41	13	0	High-quality	High-quality	100	AAI-based
H22_idba_127	16359	No	NA	21	7	0	Complete	High-quality	100	ITR
H23_idba_5	123936	No	NA	152	38	4	Complete	High-quality	100	DTR
H23_idba_8	98987	No	NA	116	18	3	Complete	High-quality	100	DTR
H23_idba_9	97855	No	NA	100	15	1	High-quality	High-quality	97.79	AAI-based
H23_idba_12	86885	No	NA	82	9	1	High-quality	High-quality	92.02	AAI-based
H23_idba_13	86596	No	NA	128	18	4	Complete	High-quality	100	DTR
H23_idba_19	69066	No	NA	99	18	2	Complete	High-quality	100	DTR
H23_idba_22	68801	No	NA	75	14	2	Complete	High-quality	100	DTR
H23_idba_32	58099	No	NA	88	36	1	High-quality	High-quality	94.8	AAI-based
H23_idba_37	54936	No	NA	78	20	1	Complete	High-quality	100	DTR
H23_idba_43	50673	No	NA	86	16	0	High-quality	High-quality	95.58	AAI-based
H23_idba_46	48025	No	NA	74	20	0	High-quality	High-quality	95.77	AAI-based
H23_idba_48	46445	No	NA	71	13	1	High-quality	High-quality	100	AAI-based
H23_idba_49	45756	No	NA	87	18	1	Complete	High-quality	100	DTR
H23_idba_51	44844	No	NA	69	18	0	Complete	High-quality	100	DTR
H23_idba_52	44586	No	NA	80	11	0	Complete	High-quality	100	DTR
H23_idba_53	43982	No	NA	74	14	1	Complete	High-quality	100	DTR
H23_idba_56	43684	No	NA	72	23	0	Complete	High-quality	100	DTR
H23_idba_64	41735	No	NA	47	12	0	High-quality	High-quality	99.46	AAI-based
H23_idba_68	40365	No	NA	65	16	0	High-quality	High-quality	98.55	AAI-based
H23_idba_71	39818	No	NA	52	6	1	Complete	High-quality	100	DTR
H23_idba_74	37330	Yes	33471	64	19	2	Complete	High-quality	100	DTR
H23_idba_80	35602	No	NA	60	16	0	Complete	High-quality	100	DTR
H23_idba_84	35051	No	NA	50	13	0	High-quality	High-quality	97.85	AAI-based
H23_idba_280	13147	No	NA	24	4	1	Complete	High-quality	100	DTR
H23_idba_295	12796	No	NA	15	5	0	Complete	High-quality	100	ITR
H23_idba_581	6883	No	NA	5	2	0	High-quality	High-quality	100	AAI-based
H24_idba_1	154994	No	NA	205	17	3	Complete	High-quality	100	DTR
H24_idba_11	71022	No	NA	105	16	2	Complete	High-quality	100	DTR
H24_idba_20	58381	No	NA	94	19	3	Complete	High-quality	100	DTR
H24_idba_21	56776	Yes	54433	98	20	2	High-quality	High-quality	95.29	AAI-based
H24_idba_23	54203	No	NA	94	17	1	Complete	High-quality	100	DTR
H24_idba_27	46204	No	NA	75	19	0	Complete	High-quality	100	DTR
H24_idba_29	45563	No	NA	69	30	0	Complete	High-quality	100	DTR
H24_idba_35	39687	No	NA	68	22	1	High-quality	High-quality	100	AAI-based
H24_idba_36	39620	No	NA	64	31	0	Complete	High-quality	100	DTR
H24_idba_39	38729	No	NA	43	20	0	Complete	High-quality	100	ITR
H24_idba_40	38385	No	NA	52	26	0	Complete	High-quality	100	DTR
H24_idba_41	38352	No	NA	60	24	0	Complete	High-quality	100	DTR
H24_idba_61	31439	No	NA	52	17	0	Complete	High-quality	100	DTR
H27_idba_5	198606	No	NA	303	39	4	Complete	High-quality	100	DTR
H27_idba_7	184557	No	NA	172	2	108	High-quality	High-quality	100	HMM-based
H27_idba_8	177231	No	NA	277	196	0	Complete	High-quality	100	DTR
H27_idba_17	101912	No	NA	117	23	0	Complete	High-quality	100	DTR
H27_idba_20	99199	No	NA	141	21	2	Complete	High-quality	100	DTR
H27_idba_23	93865	No	NA	86	10	4	Complete	High-quality	100	DTR
H27_idba_29	83396	No	NA	119	32	3	Complete	High-quality	100	DTR
H27_idba_36	71699	No	NA	106	16	2	Complete	High-quality	100	DTR
H27_idba_46	64381	No	NA	76	11	3	Complete	High-quality	100	DTR
H27_idba_47	63416	No	NA	81	10	0	Complete	High-quality	100	DTR
H27_idba_49	63126	No	NA	81	18	0	Complete	High-quality	100	DTR
H27_idba_51	62831	No	NA	101	31	1	Complete	High-quality	100	DTR
H27_idba_53	62467	No	NA	81	10	1	High-quality	High-quality	100	AAI-based
H27_idba_58	60876	No	NA	93	36	0	High-quality	High-quality	99.61	AAI-based
H27_idba_60	60567	No	NA	93	34	0	High-quality	High-quality	100	AAI-based
H27_idba_66	58633	No	NA	82	32	1	High-quality	High-quality	99.91	AAI-based
H27_idba_67	58140	No	NA	90	20	0	High-quality	High-quality	98.56	AAI-based
H27_idba_73	56071	No	NA	97	24	0	High-quality	High-quality	92.77	AAI-based
H27_idba_74	55978	Yes	34778	57	5	14	High-quality	High-quality	90.32	AAI-based
H27_idba_75	54606	No	NA	77	19	1	High-quality	High-quality	97.51	AAI-based
H27_idba_79	53815	No	NA	76	20	1	Complete	High-quality	100	DTR
H27_idba_91	49547	No	NA	81	33	0	Complete	High-quality	100	DTR
H27_idba_92	49483	No	NA	95	32	0	Complete	High-quality	100	DTR
H27_idba_99	48484	No	NA	67	24	1	Complete	High-quality	100	DTR
H27_idba_103	48320	No	NA	73	35	1	Complete	High-quality	100	DTR
H27_idba_108	47524	No	NA	68	32	0	Complete	High-quality	100	DTR
H27_idba_110	47073	Yes	33378	44	4	9	Complete	High-quality	100	Provirus
H27_idba_115	46187	No	NA	81	54	0	Complete	High-quality	100	DTR
H27_idba_119	45416	No	NA	62	20	1	Complete	High-quality	100	DTR
H27_idba_122	45128	No	NA	71	24	0	High-quality	High-quality	99.03	AAI-based
H27_idba_123	45065	No	NA	57	28	1	High-quality	High-quality	100	AAI-based
H27_idba_127	44535	No	NA	64	32	0	High-quality	High-quality	100	AAI-based
H27_idba_128	44495	No	NA	42	8	1	High-quality	High-quality	100	AAI-based
H27_idba_130	44431	No	NA	72	20	0	Complete	High-quality	100	DTR
H27_idba_132	43804	No	NA	65	17	2	Complete	High-quality	100	DTR
H27_idba_133	43763	No	NA	42	6	3	High-quality	High-quality	100	AAI-based
H27_idba_135	43723	No	NA	63	23	0	Complete	High-quality	100	DTR
H27_idba_137	43549	No	NA	54	26	0	Complete	High-quality	100	DTR
H27_idba_139	43342	No	NA	56	43	0	Complete	High-quality	100	DTR
H27_idba_143	43072	No	NA	58	27	1	Complete	High-quality	100	DTR
H27_idba_147	42839	No	NA	55	20	1	High-quality	High-quality	95.51	AAI-based
H27_idba_148	42750	No	NA	63	9	0	Complete	High-quality	100	DTR
H27_idba_150	42699	No	NA	80	15	0	Complete	High-quality	100	DTR
H27_idba_154	42247	No	NA	57	7	1	Complete	High-quality	100	DTR
H27_idba_156	41857	No	NA	65	26	0	High-quality	High-quality	100	AAI-based
H27_idba_158	41797	No	NA	53	28	1	Complete	High-quality	100	DTR
H27_idba_159	41756	No	NA	65	25	1	High-quality	High-quality	100	AAI-based
H27_idba_162	41523	No	NA	45	4	1	High-quality	High-quality	91.78	AAI-based
H27_idba_164	41091	No	NA	63	24	2	Complete	High-quality	100	DTR
H27_idba_169	40652	No	NA	76	21	0	Complete	High-quality	100	DTR
H27_idba_171	40571	No	NA	53	48	0	Complete	High-quality	100	DTR
H27_idba_178	40139	No	NA	69	15	0	Complete	High-quality	100	DTR
H27_idba_179	40075	No	NA	51	17	2	High-quality	High-quality	93.27	AAI-based
H27_idba_182	39865	No	NA	50	16	1	Complete	High-quality	100	DTR
H27_idba_184	39726	No	NA	64	9	0	Complete	High-quality	100	DTR
H27_idba_187	39583	No	NA	45	15	0	High-quality	High-quality	97.07	AAI-based
H27_idba_188	39528	No	NA	58	19	1	Complete	High-quality	100	DTR
H27_idba_192	39269	No	NA	67	17	4	Complete	High-quality	100	DTR
H27_idba_197	38950	No	NA	55	23	0	High-quality	High-quality	98.83	AAI-based
H27_idba_199	38593	No	NA	50	10	1	Complete	High-quality	100	DTR
H27_idba_203	38315	No	NA	46	4	0	Complete	High-quality	100	DTR
H27_idba_204	38138	No	NA	54	21	0	Complete	High-quality	100	DTR
H27_idba_205	38109	No	NA	55	20	0	Complete	High-quality	100	DTR
H27_idba_215	37298	No	NA	40	12	1	High-quality	High-quality	100	AAI-based
H27_idba_217	37217	No	NA	75	14	1	Complete	High-quality	100	DTR
H27_idba_224	36284	No	NA	53	15	0	Complete	High-quality	100	DTR
H27_idba_225	36276	No	NA	45	22	0	High-quality	High-quality	96.63	AAI-based
H27_idba_230	35883	No	NA	50	15	1	Complete	High-quality	100	DTR
H27_idba_238	35455	No	NA	55	15	0	Complete	High-quality	100	DTR
H27_idba_239	35390	No	NA	53	38	0	Complete	High-quality	100	DTR
H27_idba_247	34990	No	NA	59	22	0	Complete	High-quality	100	DTR
H27_idba_255	34187	No	NA	55	14	0	High-quality	High-quality	96.36	AAI-based
H27_idba_256	34175	No	NA	48	13	0	Complete	High-quality	100	DTR
H27_idba_263	33864	No	NA	61	19	1	Complete	High-quality	100	ITR
H27_idba_264	33840	No	NA	56	14	0	High-quality	High-quality	98.68	AAI-based
H27_idba_269	33628	No	NA	63	15	1	Complete	High-quality	100	DTR
H27_idba_278	32803	No	NA	48	13	2	Complete	High-quality	100	DTR
H27_idba_294	31845	No	NA	50	15	0	Complete	High-quality	100	DTR
H27_idba_303	31300	No	NA	51	18	0	Complete	High-quality	100	DTR
H27_idba_332	29399	No	NA	39	20	0	High-quality	High-quality	99.21	AAI-based
H27_idba_674	18114	No	NA	29	7	0	Complete	High-quality	100	DTR
H27_idba_828	15251	No	NA	26	4	0	Complete	High-quality	100	DTR
H27_idba_942	13644	No	NA	18	5	0	Complete	High-quality	100	ITR
H27_idba_976	13164	No	NA	16	5	0	Complete	High-quality	100	ITR
H27_idba_983	13060	No	NA	26	3	0	Complete	High-quality	100	DTR
H27_idba_1903	6752	No	NA	7	3	0	Complete	High-quality	100	DTR
H28_idba_1	319130	No	NA	271	1	175	High-quality	High-quality	100	HMM-based
H28_idba_3	259144	No	NA	239	4	154	High-quality	High-quality	100	HMM-based
H28_idba_7	190703	No	NA	191	2	108	High-quality	High-quality	100	HMM-based
H28_idba_8	184179	No	NA	240	35	8	Complete	High-quality	100	DTR
H28_idba_35	100010	No	NA	97	14	1	Complete	High-quality	100	DTR
H28_idba_36	98859	No	NA	111	14	1	Complete	High-quality	100	DTR
H28_idba_71	72864	No	NA	121	16	1	High-quality	High-quality	92.74	AAI-based
H28_idba_104	62480	No	NA	88	24	3	Complete	High-quality	100	DTR
H28_idba_110	61080	No	NA	94	36	1	Complete	High-quality	100	DTR
H28_idba_120	58644	No	NA	96	18	2	Complete	High-quality	100	DTR
H28_idba_121	58546	No	NA	83	14	2	High-quality	High-quality	98.08	AAI-based
H28_idba_131	56302	No	NA	88	13	2	Complete	High-quality	100	DTR
H28_idba_135	55390	Yes	39149	70	13	15	Complete	High-quality	100	Provirus
H28_idba_139	55133	No	NA	90	32	0	High-quality	High-quality	95.31	AAI-based
H28_idba_150	52860	No	NA	82	28	0	Complete	High-quality	100	DTR
H28_idba_177	48665	No	NA	65	20	1	High-quality	High-quality	99.19	AAI-based
H28_idba_178	48508	No	NA	70	22	0	High-quality	High-quality	100	AAI-based
H28_idba_184	47314	No	NA	81	26	1	Complete	High-quality	100	DTR
H28_idba_198	45552	No	NA	60	29	0	Complete	High-quality	100	DTR
H28_idba_208	43881	No	NA	75	24	1	Complete	High-quality	100	ITR
H28_idba_212	43438	No	NA	70	17	1	Complete	High-quality	100	DTR
H28_idba_215	43257	No	NA	43	7	2	High-quality	High-quality	100	AAI-based
H28_idba_218	43098	No	NA	67	15	2	High-quality	High-quality	90.25	AAI-based
H28_idba_219	42805	No	NA	71	17	1	Complete	High-quality	100	DTR
H28_idba_224	42589	No	NA	76	15	0	High-quality	High-quality	95.45	AAI-based
H28_idba_226	42491	No	NA	73	17	0	Complete	High-quality	100	DTR
H28_idba_233	42055	No	NA	54	15	1	High-quality	High-quality	100	AAI-based
H28_idba_239	41932	No	NA	45	5	2	High-quality	High-quality	97.9	AAI-based
H28_idba_243	41874	No	NA	55	7	0	Complete	High-quality	100	DTR
H28_idba_244	41727	No	NA	73	22	0	Complete	High-quality	100	DTR
H28_idba_252	41382	No	NA	63	26	1	Complete	High-quality	100	DTR
H28_idba_254	41280	No	NA	62	24	2	Complete	High-quality	100	DTR
H28_idba_257	40926	No	NA	71	23	2	Complete	High-quality	100	DTR
H28_idba_270	40059	No	NA	64	20	0	Complete	High-quality	100	DTR
H28_idba_274	39729	No	NA	70	21	0	Complete	High-quality	100	DTR
H28_idba_275	39600	No	NA	49	10	1	Complete	High-quality	100	DTR
H28_idba_276	39540	No	NA	64	19	0	Complete	High-quality	100	DTR
H28_idba_279	39368	No	NA	56	23	0	High-quality	High-quality	97.41	AAI-based
H28_idba_281	39217	No	NA	62	23	2	Complete	High-quality	100	DTR
H28_idba_291	38448	No	NA	54	19	0	Complete	High-quality	100	DTR
H28_idba_292	38331	No	NA	62	11	0	Complete	High-quality	100	DTR
H28_idba_294	37857	No	NA	50	6	3	High-quality	High-quality	90.13	AAI-based
H28_idba_298	37421	No	NA	69	19	1	Complete	High-quality	100	DTR
H28_idba_300	37322	No	NA	54	16	0	High-quality	High-quality	93.4	AAI-based
H28_idba_306	36750	No	NA	68	21	3	Complete	High-quality	100	DTR
H28_idba_307	36637	No	NA	45	7	0	High-quality	High-quality	92.96	AAI-based
H28_idba_308	36615	No	NA	55	17	1	High-quality	High-quality	94.75	AAI-based
H28_idba_309	36544	No	NA	60	17	0	Complete	High-quality	100	DTR
H28_idba_312	36474	No	NA	51	14	0	High-quality	High-quality	96.64	AAI-based
H28_idba_315	36402	No	NA	44	15	0	High-quality	High-quality	100	AAI-based
H28_idba_323	35968	No	NA	51	16	1	Complete	High-quality	100	DTR
H28_idba_325	35957	No	NA	41	5	0	Complete	High-quality	100	DTR
H28_idba_329	35726	No	NA	50	20	0	Complete	High-quality	100	DTR
H28_idba_332	35518	No	NA	54	14	0	High-quality	High-quality	92.48	AAI-based
H28_idba_334	35499	No	NA	59	19	1	Complete	High-quality	100	DTR
H28_idba_336	35059	No	NA	44	25	1	Complete	High-quality	100	DTR
H28_idba_341	34900	No	NA	51	14	2	Complete	High-quality	100	DTR
H28_idba_344	34545	No	NA	50	9	0	High-quality	High-quality	92.55	AAI-based
H28_idba_351	34215	No	NA	58	15	2	Complete	High-quality	100	DTR
H28_idba_356	33980	No	NA	57	15	0	Complete	High-quality	100	ITR
H28_idba_357	33909	No	NA	53	15	0	High-quality	High-quality	99.56	AAI-based
H28_idba_369	33459	No	NA	44	9	1	Complete	High-quality	100	DTR
H28_idba_370	33431	No	NA	46	10	1	High-quality	High-quality	93.4	AAI-based
H28_idba_415	30818	No	NA	45	9	1	High-quality	High-quality	91.31	AAI-based
H28_idba_699	20401	No	NA	34	3	0	High-quality	High-quality	100	AAI-based
H28_idba_869	16823	No	NA	25	8	0	High-quality	High-quality	98.56	AAI-based
H28_idba_924	15964	No	NA	25	7	0	High-quality	High-quality	95.69	AAI-based
H28_idba_1181	12529	No	NA	18	2	1	Complete	High-quality	100	DTR
H28_idba_1259	11927	No	NA	18	3	0	Complete	High-quality	100	ITR
H28_idba_2031	7078	No	NA	9	3	0	Complete	High-quality	100	DTR
H31_idba_1	157561	No	NA	213	46	5	Complete	High-quality	100	DTR
H31_idba_2	142749	No	NA	166	33	5	High-quality	High-quality	100	AAI-based
H31_idba_3	130141	No	NA	178	34	3	High-quality	High-quality	97.75	AAI-based
H31_idba_6	101778	No	NA	124	23	1	High-quality	High-quality	100	AAI-based
H31_idba_7	100126	No	NA	105	15	0	Complete	High-quality	100	DTR
H31_idba_9	95299	No	NA	96	10	0	Complete	High-quality	100	DTR
H31_idba_11	93682	No	NA	132	33	1	High-quality	High-quality	100	AAI-based
H31_idba_12	88165	No	NA	114	16	2	Complete	High-quality	100	DTR
H31_idba_17	80515	No	NA	115	14	2	High-quality	High-quality	100	AAI-based
H31_idba_23	66920	No	NA	91	39	2	High-quality	High-quality	100	AAI-based
H31_idba_25	65019	No	NA	64	6	3	High-quality	High-quality	99.55	AAI-based
H31_idba_28	62720	No	NA	90	13	4	Complete	High-quality	100	DTR
H31_idba_29	62686	No	NA	80	31	2	Complete	High-quality	100	DTR
H31_idba_32	59619	No	NA	92	25	0	High-quality	High-quality	99.23	AAI-based
H31_idba_35	58409	Yes	48857	84	28	7	High-quality	High-quality	91.56	AAI-based
H31_idba_36	57748	No	NA	100	18	1	Complete	High-quality	100	DTR
H31_idba_39	55618	No	NA	91	15	2	High-quality	High-quality	96.44	AAI-based
H31_idba_43	50946	No	NA	85	32	2	Complete	High-quality	100	DTR
H31_idba_47	49593	No	NA	91	21	0	Complete	High-quality	100	DTR
H31_idba_48	48967	No	NA	63	32	0	Complete	High-quality	100	DTR
H31_idba_56	46414	No	NA	71	23	1	High-quality	High-quality	98.61	AAI-based
H31_idba_59	45875	No	NA	69	13	1	Complete	High-quality	100	DTR
H31_idba_61	45724	No	NA	72	43	0	Complete	High-quality	100	DTR
H31_idba_65	43954	No	NA	61	17	0	Complete	High-quality	100	DTR
H31_idba_69	43593	No	NA	70	19	0	High-quality	High-quality	92.38	AAI-based
H31_idba_71	42924	No	NA	79	15	0	Complete	High-quality	100	DTR
H31_idba_78	41557	No	NA	65	17	1	High-quality	High-quality	92.59	AAI-based
H31_idba_86	40158	No	NA	43	22	0	Complete	High-quality	100	DTR
H31_idba_89	39731	No	NA	57	20	1	Complete	High-quality	100	DTR
H31_idba_90	39610	No	NA	46	8	0	Complete	High-quality	100	DTR
H31_idba_93	38722	No	NA	44	20	0	High-quality	High-quality	96.83	AAI-based
H31_idba_96	38548	No	NA	58	14	1	Complete	High-quality	100	DTR
H31_idba_97	38503	No	NA	58	17	0	Complete	High-quality	100	DTR
H31_idba_99	38434	No	NA	57	20	0	Complete	High-quality	100	DTR
H31_idba_105	37496	No	NA	49	7	0	Complete	High-quality	100	ITR
H31_idba_108	37388	No	NA	57	27	0	High-quality	High-quality	99.4	AAI-based
H31_idba_115	35881	No	NA	45	9	0	Complete	High-quality	100	DTR
H31_idba_126	34190	No	NA	53	20	0	High-quality	High-quality	100	AAI-based
H31_idba_136	33234	No	NA	65	11	0	Complete	High-quality	100	DTR
H31_idba_140	32614	No	NA	69	16	2	Complete	High-quality	100	DTR
H31_idba_146	32135	No	NA	48	18	1	High-quality	High-quality	99.57	AAI-based
H31_idba_248	22138	No	NA	45	3	0	Complete	High-quality	100	DTR
H31_idba_450	13407	No	NA	19	5	0	High-quality	High-quality	97.87	AAI-based
H31_idba_468	12974	No	NA	20	5	0	High-quality	High-quality	95.42	AAI-based
H31_idba_469	12961	No	NA	19	2	1	Complete	High-quality	100	DTR
H31_idba_747	8169	No	NA	13	1	0	Complete	High-quality	100	DTR
H31_idba_911	6664	No	NA	8	3	0	High-quality	High-quality	97.65	AAI-based
H32_idba_5	223135	No	NA	141	1	102	High-quality	High-quality	100	HMM-based
H32_idba_8	177052	No	NA	128	1	93	High-quality	High-quality	100	HMM-based
H32_idba_12	158913	No	NA	214	17	4	Complete	High-quality	100	DTR
H32_idba_22	118549	No	NA	97	1	62	High-quality	High-quality	100	HMM-based
H32_idba_32	101862	No	NA	93	1	58	High-quality	High-quality	100	HMM-based
H32_idba_43	95888	No	NA	131	31	1	High-quality	High-quality	100	AAI-based
H32_idba_91	64725	No	NA	97	14	1	Complete	High-quality	100	DTR
H32_idba_97	61056	No	NA	93	18	0	High-quality	High-quality	100	AAI-based
H32_idba_100	60571	No	NA	94	13	1	Complete	High-quality	100	DTR
H32_idba_108	59014	No	NA	89	16	3	High-quality	High-quality	99.51	AAI-based
H32_idba_112	57107	No	NA	106	20	1	Complete	High-quality	100	DTR
H32_idba_114	55786	No	NA	72	30	0	Complete	High-quality	100	DTR
H32_idba_128	52897	No	NA	58	9	1	High-quality	High-quality	93.74	AAI-based
H32_idba_133	51410	No	NA	77	33	2	Complete	High-quality	100	ITR
H32_idba_150	46194	No	NA	70	22	1	Complete	High-quality	100	DTR
H32_idba_153	45535	No	NA	69	29	0	Complete	High-quality	100	DTR
H32_idba_156	44572	No	NA	82	16	0	Complete	High-quality	100	DTR
H32_idba_164	43070	No	NA	47	6	3	High-quality	High-quality	100	AAI-based
H32_idba_169	41913	No	NA	51	22	0	Complete	High-quality	100	DTR
H32_idba_172	41610	No	NA	59	16	0	High-quality	High-quality	94.66	AAI-based
H32_idba_173	41598	No	NA	60	9	2	Complete	High-quality	100	DTR
H32_idba_177	41065	No	NA	68	14	3	Complete	High-quality	100	DTR
H32_idba_184	40118	No	NA	61	27	2	High-quality	High-quality	100	AAI-based
H32_idba_185	40089	No	NA	47	7	3	High-quality	High-quality	93.6	AAI-based
H32_idba_187	39587	No	NA	57	20	1	High-quality	High-quality	100	AAI-based
H32_idba_188	39537	No	NA	59	18	0	Complete	High-quality	100	DTR
H32_idba_189	39366	No	NA	54	18	0	Complete	High-quality	100	DTR
H32_idba_191	38741	No	NA	62	25	1	High-quality	High-quality	97.15	AAI-based
H32_idba_197	38266	No	NA	56	18	1	High-quality	High-quality	99.05	AAI-based
H32_idba_199	37420	No	NA	57	15	1	High-quality	High-quality	100	AAI-based
H32_idba_231	32102	No	NA	51	16	2	Complete	High-quality	100	DTR
H34_idba_5	213035	No	NA	300	37	9	Complete	High-quality	100	DTR
H34_idba_9	190411	No	NA	281	47	3	High-quality	High-quality	100	AAI-based
H34_idba_11	177413	No	NA	209	31	4	Complete	High-quality	100	DTR
H34_idba_12	175853	No	NA	273	188	0	Complete	High-quality	100	DTR
H34_idba_13	174866	No	NA	203	43	5	Complete	High-quality	100	DTR
H34_idba_16	165788	No	NA	253	32	6	High-quality	High-quality	90.2	AAI-based
H34_idba_19	158886	No	NA	187	29	1	High-quality	High-quality	97.58	AAI-based
H34_idba_23	151827	No	NA	118	1	83	High-quality	High-quality	100	HMM-based
H34_idba_31	138112	No	NA	184	37	6	Complete	High-quality	100	DTR
H34_idba_33	134008	No	NA	202	27	1	Complete	High-quality	100	DTR
H34_idba_34	131351	No	NA	120	3	76	High-quality	High-quality	100	HMM-based
H34_idba_62	98286	No	NA	104	13	1	Complete	High-quality	100	DTR
H34_idba_64	95869	No	NA	92	5	45	High-quality	High-quality	96.73	HMM-based
H34_idba_66	95320	No	NA	92	11	5	Complete	High-quality	100	DTR
H34_idba_69	94140	No	NA	99	17	0	Complete	High-quality	100	DTR
H34_idba_71	92632	No	NA	99	6	0	Complete	High-quality	100	DTR
H34_idba_78	86316	No	NA	111	14	2	Complete	High-quality	100	DTR
H34_idba_80	85644	No	NA	112	15	3	Complete	High-quality	100	ITR
H34_idba_81	84320	No	NA	104	11	0	Complete	High-quality	100	DTR
H34_idba_91	77258	No	NA	111	13	0	High-quality	High-quality	97.96	AAI-based
H34_idba_103	74443	No	NA	123	19	5	Complete	High-quality	100	DTR
H34_idba_111	72573	Yes	62500	93	20	7	Complete	High-quality	100	DTR
H34_idba_115	72047	No	NA	84	13	1	Complete	High-quality	100	DTR
H34_idba_118	71245	No	NA	86	24	0	Complete	High-quality	100	ITR
H34_idba_122	68462	No	NA	96	16	2	High-quality	High-quality	96.49	AAI-based
H34_idba_132	65029	Yes	50862	85	22	12	High-quality	High-quality	97.13	AAI-based
H34_idba_144	62521	No	NA	102	22	1	Complete	High-quality	100	DTR
H34_idba_145	62349	No	NA	71	8	0	Complete	High-quality	100	DTR
H34_idba_147	61952	No	NA	70	1	47	High-quality	High-quality	100	HMM-based
H34_idba_153	61066	No	NA	82	18	1	High-quality	High-quality	100	AAI-based
H34_idba_154	61010	No	NA	68	1	49	High-quality	High-quality	100	HMM-based
H34_idba_156	59184	No	NA	99	22	0	Complete	High-quality	100	ITR
H34_idba_161	57337	No	NA	87	17	1	High-quality	High-quality	100	AAI-based
H34_idba_166	56172	No	NA	106	23	3	Complete	High-quality	100	DTR
H34_idba_177	54144	No	NA	84	23	1	Complete	High-quality	100	DTR
H34_idba_193	50876	No	NA	87	19	1	Complete	High-quality	100	DTR
H34_idba_194	50758	No	NA	49	1	27	High-quality	High-quality	100	HMM-based
H34_idba_197	50640	No	NA	82	66	0	Complete	High-quality	100	DTR
H34_idba_199	49357	No	NA	85	17	0	Complete	High-quality	100	DTR
H34_idba_200	49159	No	NA	68	17	2	High-quality	High-quality	99.35	AAI-based
H34_idba_218	46150	No	NA	72	13	1	High-quality	High-quality	100	AAI-based
H34_idba_233	44604	No	NA	76	24	0	Complete	High-quality	100	DTR
H34_idba_236	43881	No	NA	70	16	0	Complete	High-quality	100	DTR
H34_idba_242	42964	No	NA	71	14	0	High-quality	High-quality	100	AAI-based
H34_idba_244	42514	No	NA	64	9	0	High-quality	High-quality	100	AAI-based
H34_idba_245	42441	No	NA	53	8	0	Complete	High-quality	100	DTR
H34_idba_247	42380	No	NA	59	23	1	Complete	High-quality	100	DTR
H34_idba_249	41981	No	NA	45	20	0	Complete	High-quality	100	DTR
H34_idba_250	41918	No	NA	54	18	1	High-quality	High-quality	100	AAI-based
H34_idba_251	41705	No	NA	76	21	0	Complete	High-quality	100	DTR
H34_idba_252	41667	No	NA	66	20	0	High-quality	High-quality	90.8	AAI-based
H34_idba_257	41234	No	NA	60	13	0	Complete	High-quality	100	DTR
H34_idba_261	41092	No	NA	56	6	1	High-quality	High-quality	97.59	AAI-based
H34_idba_262	41087	No	NA	58	28	0	Complete	High-quality	100	DTR
H34_idba_265	41010	No	NA	69	21	1	High-quality	High-quality	100	AAI-based
H34_idba_267	40967	No	NA	57	16	0	High-quality	High-quality	91	AAI-based
H34_idba_273	40434	No	NA	55	38	0	Complete	High-quality	100	DTR
H34_idba_275	40406	No	NA	44	13	1	Complete	High-quality	100	DTR
H34_idba_276	40347	No	NA	58	28	2	Complete	High-quality	100	DTR
H34_idba_278	40188	No	NA	53	20	0	High-quality	High-quality	93.13	AAI-based
H34_idba_280	40124	No	NA	54	7	0	Complete	High-quality	100	DTR
H34_idba_281	40119	No	NA	65	21	0	Complete	High-quality	100	DTR
H34_idba_287	39560	No	NA	49	10	1	Complete	High-quality	100	DTR
H34_idba_294	39195	No	NA	55	22	1	Complete	High-quality	100	DTR
H34_idba_295	39182	No	NA	54	14	0	Complete	High-quality	100	DTR
H34_idba_296	39147	No	NA	51	25	0	High-quality	High-quality	92.04	AAI-based
H34_idba_298	39108	No	NA	64	21	1	Complete	High-quality	100	DTR
H34_idba_301	39005	No	NA	51	22	0	Complete	High-quality	100	DTR
H34_idba_303	38883	No	NA	38	6	1	Complete	High-quality	100	DTR
H34_idba_305	38795	No	NA	69	16	0	Complete	High-quality	100	DTR
H34_idba_313	38344	No	NA	56	16	0	High-quality	High-quality	91.15	AAI-based
H34_idba_315	38201	No	NA	50	18	2	High-quality	High-quality	96.29	AAI-based
H34_idba_316	38086	No	NA	46	4	0	Complete	High-quality	100	DTR
H34_idba_317	37974	No	NA	59	15	2	Complete	High-quality	100	DTR
H34_idba_319	37834	No	NA	65	20	1	High-quality	High-quality	94.43	AAI-based
H34_idba_320	37768	No	NA	51	16	1	Complete	High-quality	100	DTR
H34_idba_328	37363	No	NA	60	20	0	High-quality	High-quality	100	AAI-based
H34_idba_329	37329	No	NA	54	13	1	High-quality	High-quality	100	AAI-based
H34_idba_331	37184	No	NA	53	16	1	High-quality	High-quality	96.79	AAI-based
H34_idba_332	37151	No	NA	57	19	0	High-quality	High-quality	97.96	AAI-based
H34_idba_333	37147	No	NA	54	28	0	Complete	High-quality	100	DTR
H34_idba_335	37002	No	NA	51	18	1	High-quality	High-quality	100	AAI-based
H34_idba_338	36576	No	NA	56	26	2	Complete	High-quality	100	DTR
H34_idba_339	36524	No	NA	55	30	0	Complete	High-quality	100	DTR
H34_idba_342	36157	No	NA	57	18	0	Complete	High-quality	100	DTR
H34_idba_343	36038	No	NA	67	18	0	High-quality	High-quality	100	AAI-based
H34_idba_353	35094	No	NA	54	21	0	High-quality	High-quality	98.7	AAI-based
H34_idba_354	35037	No	NA	46	9	0	Complete	High-quality	100	DTR
H34_idba_370	33936	No	NA	51	19	1	High-quality	High-quality	100	AAI-based
H34_idba_371	33929	No	NA	51	24	0	Complete	High-quality	100	DTR
H34_idba_374	33846	No	NA	53	15	1	High-quality	High-quality	90.45	AAI-based
H34_idba_376	33569	No	NA	46	12	0	Complete	High-quality	100	DTR
H34_idba_388	32999	No	NA	56	16	0	Complete	High-quality	100	DTR
H34_idba_392	32733	No	NA	55	19	2	Complete	High-quality	100	DTR
H34_idba_397	32540	No	NA	50	18	1	High-quality	High-quality	100	AAI-based
H34_idba_423	30939	No	NA	45	14	0	High-quality	High-quality	97.21	AAI-based
H34_idba_435	30224	No	NA	44	14	2	High-quality	High-quality	91.82	AAI-based
H34_idba_666	21097	No	NA	39	11	2	High-quality	High-quality	90.54	AAI-based
H34_idba_939	15877	No	NA	27	4	0	Complete	High-quality	100	DTR
H34_idba_1087	14062	No	NA	18	6	1	Complete	High-quality	100	DTR
H34_idba_1133	13413	No	NA	18	4	0	Complete	High-quality	100	ITR
H34_idba_1209	12643	No	NA	24	5	0	Complete	High-quality	100	DTR
H46_idba_6	264997	No	NA	248	3	149	High-quality	High-quality	100	HMM-based
H46_idba_18	174843	Yes	46422	145	11	61	Complete	High-quality	100	Provirus
H46_idba_26	155420	No	NA	139	4	93	High-quality	High-quality	99.59	HMM-based
H46_idba_39	127527	No	NA	145	7	6	High-quality	High-quality	95.22	HMM-based
H46_idba_69	98066	No	NA	101	17	0	Complete	High-quality	100	DTR
H46_idba_83	88163	No	NA	80	1	58	High-quality	High-quality	100	HMM-based
H46_idba_89	84764	No	NA	112	13	2	Complete	High-quality	100	DTR
H46_idba_97	81357	No	NA	81	35	4	High-quality	High-quality	100	AAI-based
H46_idba_135	62547	No	NA	104	15	3	Complete	High-quality	100	DTR
H46_idba_137	61621	No	NA	89	30	3	High-quality	High-quality	99.09	AAI-based
H46_idba_140	61063	No	NA	92	35	0	High-quality	High-quality	99.89	AAI-based
H46_idba_159	56795	No	NA	97	14	1	Complete	High-quality	100	ITR
H46_idba_175	51992	No	NA	90	20	5	High-quality	High-quality	94.88	AAI-based
H46_idba_205	45793	No	NA	88	32	1	Complete	High-quality	100	DTR
H46_idba_208	45444	No	NA	75	26	0	Complete	High-quality	100	DTR
H46_idba_209	45209	No	NA	75	21	2	Complete	High-quality	100	DTR
H46_idba_226	42630	No	NA	71	18	0	High-quality	High-quality	100	AAI-based
H46_idba_228	42555	No	NA	48	14	2	Complete	High-quality	100	DTR
H46_idba_231	42085	No	NA	74	21	0	Complete	High-quality	100	DTR
H46_idba_233	41983	No	NA	73	19	1	Complete	High-quality	100	DTR
H46_idba_235	41655	No	NA	67	32	0	High-quality	High-quality	91.23	AAI-based
H46_idba_245	40583	No	NA	54	23	0	High-quality	High-quality	96.18	AAI-based
H46_idba_246	40490	No	NA	52	26	1	High-quality	High-quality	97.52	AAI-based
H46_idba_248	40273	No	NA	77	15	2	Complete	High-quality	100	DTR
H46_idba_250	39876	No	NA	66	15	5	High-quality	High-quality	100	AAI-based
H46_idba_252	39560	No	NA	49	10	1	Complete	High-quality	100	DTR
H46_idba_254	39440	No	NA	65	23	0	Complete	High-quality	100	DTR
H46_idba_255	39348	No	NA	61	26	3	Complete	High-quality	100	DTR
H46_idba_260	38979	No	NA	55	7	1	Complete	High-quality	100	DTR
H46_idba_263	38805	No	NA	54	16	0	Complete	High-quality	100	DTR
H46_idba_282	35876	No	NA	54	15	0	Complete	High-quality	100	DTR
H46_idba_285	35732	No	NA	48	18	0	High-quality	High-quality	99.73	AAI-based
H46_idba_296	34861	No	NA	57	24	1	Complete	High-quality	100	DTR
H46_idba_297	34746	No	NA	54	18	0	Complete	High-quality	100	DTR
H46_idba_301	34506	No	NA	55	17	1	High-quality	High-quality	95.59	AAI-based
H46_idba_307	34041	No	NA	47	15	1	Complete	High-quality	100	DTR
H46_idba_308	33955	No	NA	61	18	1	Complete	High-quality	100	DTR
H46_idba_312	33554	No	NA	47	10	1	High-quality	High-quality	90.57	AAI-based
H46_idba_316	33339	No	NA	59	24	0	High-quality	High-quality	97.46	AAI-based
H46_idba_326	32516	No	NA	60	22	0	Complete	High-quality	100	DTR
H46_idba_348	30273	No	NA	50	15	0	Complete	High-quality	100	DTR
H46_idba_360	29768	No	NA	46	13	0	Complete	High-quality	100	DTR
H46_idba_782	13841	No	NA	18	6	0	High-quality	High-quality	99.65	AAI-based
H47_idba_1	182621	No	NA	296	40	5	Complete	High-quality	100	DTR
H47_idba_2	146052	No	NA	210	37	2	Complete	High-quality	100	DTR
H47_idba_4	117821	No	NA	147	35	2	Complete	High-quality	100	DTR
H47_idba_9	101388	No	NA	136	20	4	High-quality	High-quality	95.42	AAI-based
H47_idba_10	100417	No	NA	98	15	1	Complete	High-quality	100	DTR
H47_idba_11	99629	No	NA	102	17	1	Complete	High-quality	100	DTR
H47_idba_12	97807	No	NA	110	16	0	Complete	High-quality	100	DTR
H47_idba_13	87490	No	NA	90	1	27	High-quality	High-quality	100	HMM-based
H47_idba_14	86448	No	NA	112	13	2	Complete	High-quality	100	DTR
H47_idba_16	82753	No	NA	113	26	1	Complete	High-quality	100	DTR
H47_idba_18	79376	No	NA	120	41	3	High-quality	High-quality	100	AAI-based
H47_idba_19	77197	No	NA	111	29	2	Complete	High-quality	100	DTR
H47_idba_28	65143	No	NA	63	7	3	Complete	High-quality	100	DTR
H47_idba_30	64386	No	NA	116	23	1	High-quality	High-quality	100	AAI-based
H47_idba_35	61672	No	NA	93	18	0	High-quality	High-quality	100	AAI-based
H47_idba_37	60298	No	NA	81	32	0	Complete	High-quality	100	DTR
H47_idba_39	57988	No	NA	77	12	6	Complete	High-quality	100	ITR
H47_idba_41	54723	No	NA	94	15	1	Complete	High-quality	100	DTR
H47_idba_44	53817	No	NA	77	24	1	Complete	High-quality	100	DTR
H47_idba_45	53803	No	NA	80	21	1	Complete	High-quality	100	DTR
H47_idba_50	49778	No	NA	73	21	0	High-quality	High-quality	99.26	AAI-based
H47_idba_52	49603	No	NA	77	30	1	Complete	High-quality	100	ITR
H47_idba_62	46996	No	NA	75	27	0	Complete	High-quality	100	ITR
H47_idba_63	46806	No	NA	68	28	0	High-quality	High-quality	94.74	AAI-based
H47_idba_66	45852	No	NA	71	33	0	Complete	High-quality	100	DTR
H47_idba_68	45566	No	NA	61	30	0	Complete	High-quality	100	DTR
H47_idba_69	45419	No	NA	56	10	2	High-quality	High-quality	100	AAI-based
H47_idba_70	45183	No	NA	62	19	1	High-quality	High-quality	100	AAI-based
H47_idba_72	44765	No	NA	71	28	1	Complete	High-quality	100	DTR
H47_idba_73	44749	No	NA	64	14	1	Complete	High-quality	100	DTR
H47_idba_77	43391	No	NA	72	20	0	High-quality	High-quality	96.18	AAI-based
H47_idba_80	42499	No	NA	80	16	1	Complete	High-quality	100	DTR
H47_idba_81	42473	No	NA	57	28	0	Complete	High-quality	100	DTR
H47_idba_85	41261	No	NA	46	9	1	Complete	High-quality	100	DTR
H47_idba_88	40950	No	NA	39	8	1	High-quality	High-quality	95.61	AAI-based
H47_idba_89	40345	No	NA	40	9	2	Complete	High-quality	100	DTR
H47_idba_92	39600	No	NA	49	10	1	Complete	High-quality	100	DTR
H47_idba_94	39393	No	NA	68	27	0	Complete	High-quality	100	DTR
H47_idba_98	39037	No	NA	63	22	0	Complete	High-quality	100	DTR
H47_idba_101	38718	No	NA	56	15	0	Complete	High-quality	100	DTR
H47_idba_102	38504	No	NA	61	18	0	High-quality	High-quality	100	AAI-based
H47_idba_104	38380	No	NA	42	3	1	Complete	High-quality	100	DTR
H47_idba_105	38332	No	NA	55	15	0	High-quality	High-quality	98.92	AAI-based
H47_idba_107	38059	No	NA	54	9	0	High-quality	High-quality	90.11	AAI-based
H47_idba_110	37779	No	NA	65	15	2	Complete	High-quality	100	DTR
H47_idba_111	37775	No	NA	36	7	1	Complete	High-quality	100	ITR
H47_idba_112	37572	No	NA	58	13	4	Complete	High-quality	100	DTR
H47_idba_113	37515	No	NA	64	16	0	Complete	High-quality	100	DTR
H47_idba_124	36558	No	NA	47	5	1	Complete	High-quality	100	DTR
H47_idba_125	36553	No	NA	42	8	0	Complete	High-quality	100	DTR
H47_idba_132	36130	No	NA	63	24	0	Complete	High-quality	100	DTR
H47_idba_133	36087	No	NA	50	23	2	Complete	High-quality	100	DTR
H47_idba_134	36076	No	NA	51	16	0	High-quality	High-quality	99.11	AAI-based
H47_idba_136	35986	No	NA	63	10	0	High-quality	High-quality	95.66	AAI-based
H47_idba_137	35874	No	NA	58	26	0	Complete	High-quality	100	DTR
H47_idba_139	35766	No	NA	45	7	2	Complete	High-quality	100	DTR
H47_idba_140	35634	No	NA	52	10	0	Complete	High-quality	100	DTR
H47_idba_142	35369	No	NA	55	15	2	Complete	High-quality	100	DTR
H47_idba_143	35324	No	NA	57	13	1	High-quality	High-quality	92.92	AAI-based
H47_idba_147	35033	No	NA	60	22	2	Complete	High-quality	100	DTR
H47_idba_154	34564	No	NA	59	15	0	Complete	High-quality	100	DTR
H47_idba_160	33633	No	NA	58	17	0	Complete	High-quality	100	DTR
H47_idba_163	33590	No	NA	48	17	1	Complete	High-quality	100	DTR
H47_idba_166	33222	No	NA	48	12	0	High-quality	High-quality	92.82	AAI-based
H47_idba_170	33029	No	NA	50	19	1	Complete	High-quality	100	DTR
H47_idba_175	32682	No	NA	46	29	0	Complete	High-quality	100	DTR
H47_idba_176	32613	No	NA	57	16	1	Complete	High-quality	100	DTR
H47_idba_178	32381	No	NA	42	4	1	Complete	High-quality	100	DTR
H47_idba_181	31731	No	NA	45	19	0	Complete	High-quality	100	DTR
H47_idba_191	30631	No	NA	26	5	0	Complete	High-quality	100	DTR
H47_idba_442	17648	No	NA	19	5	0	Complete	High-quality	100	DTR
H47_idba_687	12605	No	NA	23	1	0	Complete	High-quality	100	DTR
H48_idba_4	161194	No	NA	188	44	3	Complete	High-quality	100	DTR
H48_idba_7	109323	No	NA	158	11	2	High-quality	High-quality	100	AAI-based
H48_idba_8	109243	No	NA	134	31	3	Complete	High-quality	100	DTR
H48_idba_10	97330	No	NA	99	12	0	Complete	High-quality	100	DTR
H48_idba_20	85033	No	NA	112	14	2	Complete	High-quality	100	DTR
H48_idba_42	68705	No	NA	100	19	2	High-quality	High-quality	90.24	AAI-based
H48_idba_44	67092	No	NA	71	11	1	Complete	High-quality	100	DTR
H48_idba_49	62711	No	NA	59	5	0	Complete	High-quality	100	DTR
H48_idba_50	61744	No	NA	92	20	1	Complete	High-quality	100	DTR
H48_idba_51	61454	No	NA	100	22	0	Complete	High-quality	100	DTR
H48_idba_53	61245	No	NA	85	15	3	High-quality	High-quality	100	AAI-based
H48_idba_54	61156	Yes	58350	108	20	2	Complete	High-quality	100	DTR
H48_idba_57	59858	No	NA	92	21	0	Complete	High-quality	100	DTR
H48_idba_60	59537	No	NA	91	29	0	Complete	High-quality	100	DTR
H48_idba_61	59489	No	NA	96	25	0	Complete	High-quality	100	DTR
H48_idba_62	59130	No	NA	74	31	1	High-quality	High-quality	96.36	AAI-based
H48_idba_63	57979	No	NA	82	33	1	Complete	High-quality	100	DTR
H48_idba_67	56673	No	NA	96	17	1	High-quality	High-quality	95.11	AAI-based
H48_idba_68	56600	No	NA	96	16	3	Complete	High-quality	100	DTR
H48_idba_71	56121	No	NA	78	21	0	Complete	High-quality	100	DTR
H48_idba_72	55068	No	NA	91	18	0	Complete	High-quality	100	DTR
H48_idba_73	54810	No	NA	72	24	2	High-quality	High-quality	100	AAI-based
H48_idba_75	53861	No	NA	76	20	1	Complete	High-quality	100	DTR
H48_idba_78	53079	No	NA	93	21	0	Complete	High-quality	100	DTR
H48_idba_79	52813	No	NA	90	19	2	High-quality	High-quality	93.27	AAI-based
H48_idba_90	49815	No	NA	45	3	29	High-quality	High-quality	100	AAI-based
H48_idba_92	49690	No	NA	79	33	1	Complete	High-quality	100	DTR
H48_idba_98	48750	No	NA	74	21	1	High-quality	High-quality	100	AAI-based
H48_idba_101	48348	No	NA	84	21	1	High-quality	High-quality	96.92	AAI-based
H48_idba_114	45722	No	NA	65	36	0	High-quality	High-quality	93.53	AAI-based
H48_idba_118	44927	No	NA	71	27	0	Complete	High-quality	100	DTR
H48_idba_120	44789	No	NA	74	24	0	Complete	High-quality	100	DTR
H48_idba_121	44773	No	NA	74	17	0	Complete	High-quality	100	DTR
H48_idba_124	44343	No	NA	76	17	0	High-quality	High-quality	99.79	AAI-based
H48_idba_125	44279	No	NA	57	12	0	Complete	High-quality	100	DTR
H48_idba_128	43877	No	NA	67	23	1	High-quality	High-quality	96.26	AAI-based
H48_idba_130	43698	No	NA	73	21	1	Complete	High-quality	100	DTR
H48_idba_135	43426	No	NA	57	11	0	High-quality	High-quality	100	AAI-based
H48_idba_137	43304	No	NA	62	10	0	Complete	High-quality	100	DTR
H48_idba_139	43125	No	NA	59	8	1	Complete	High-quality	100	DTR
H48_idba_143	42748	No	NA	56	24	2	Complete	High-quality	100	DTR
H48_idba_144	42722	No	NA	71	20	0	Complete	High-quality	100	DTR
H48_idba_152	42037	No	NA	58	13	1	Complete	High-quality	100	DTR
H48_idba_153	42002	No	NA	73	13	0	High-quality	High-quality	99.73	AAI-based
H48_idba_154	41474	No	NA	47	17	0	High-quality	High-quality	100	AAI-based
H48_idba_155	41339	No	NA	73	19	2	High-quality	High-quality	98.06	AAI-based
H48_idba_158	41012	No	NA	51	8	1	Complete	High-quality	100	DTR
H48_idba_162	40717	No	NA	59	19	1	High-quality	High-quality	100	AAI-based
H48_idba_164	40648	No	NA	45	9	1	Complete	High-quality	100	DTR
H48_idba_166	40301	No	NA	40	8	1	High-quality	High-quality	94.09	AAI-based
H48_idba_167	40213	No	NA	66	24	1	Complete	High-quality	100	DTR
H48_idba_169	40080	No	NA	55	22	1	Complete	High-quality	100	DTR
H48_idba_170	40073	No	NA	70	23	0	Complete	High-quality	100	DTR
H48_idba_173	39377	No	NA	68	14	0	Complete	High-quality	100	DTR
H48_idba_176	39093	No	NA	50	19	0	Complete	High-quality	100	DTR
H48_idba_177	39012	No	NA	50	25	0	High-quality	High-quality	91.72	AAI-based
H48_idba_178	38892	No	NA	43	7	0	Complete	High-quality	100	DTR
H48_idba_179	38854	No	NA	56	9	1	Complete	High-quality	100	DTR
H48_idba_180	38846	No	NA	55	8	0	Complete	High-quality	100	DTR
H48_idba_182	38777	No	NA	59	20	2	Complete	High-quality	100	DTR
H48_idba_187	38354	Yes	28501	59	10	3	Complete	High-quality	100	DTR
H48_idba_191	38074	No	NA	60	16	1	Complete	High-quality	100	DTR
H48_idba_196	37712	No	NA	47	8	0	Complete	High-quality	100	DTR
H48_idba_204	37187	No	NA	54	41	0	Complete	High-quality	100	DTR
H48_idba_209	36940	No	NA	51	20	1	Complete	High-quality	100	ITR
H48_idba_210	36627	No	NA	64	22	1	Complete	High-quality	100	DTR
H48_idba_211	36576	No	NA	49	17	1	Complete	High-quality	100	DTR
H48_idba_216	36105	No	NA	53	14	1	High-quality	High-quality	93.49	AAI-based
H48_idba_221	35823	No	NA	59	26	0	Complete	High-quality	100	DTR
H48_idba_227	35638	No	NA	47	9	0	Complete	High-quality	100	DTR
H48_idba_228	35597	No	NA	52	23	1	Complete	High-quality	100	DTR
H48_idba_231	35370	No	NA	53	15	0	High-quality	High-quality	92.74	AAI-based
H48_idba_245	34217	No	NA	48	11	0	High-quality	High-quality	100	AAI-based
H48_idba_261	32746	No	NA	47	26	1	Complete	High-quality	100	DTR
H48_idba_267	32168	No	NA	48	13	0	Complete	High-quality	100	DTR
H48_idba_279	31270	No	NA	52	18	1	High-quality	High-quality	91.75	AAI-based
H48_idba_617	18261	No	NA	20	15	0	Complete	High-quality	100	ITR
H48_idba_829	14355	No	NA	29	3	0	Complete	High-quality	100	DTR
H48_idba_846	14106	No	NA	18	6	0	Complete	High-quality	100	ITR
H48_idba_900	13360	No	NA	16	7	0	Complete	High-quality	100	ITR
H48_idba_2368	5594	No	NA	9	5	0	High-quality	High-quality	100	AAI-based
H49_idba_5	156399	No	NA	206	17	3	High-quality	High-quality	100	AAI-based						idba	NGS
H49_idba_6	153656	No	NA	132	5	88	High-quality	High-quality	99.9	HMM-based
H49_idba_16	118217	No	NA	160	27	3	Complete	High-quality	100	DTR
H49_idba_21	102378	No	NA	128	24	5	Complete	High-quality	100	DTR
H49_idba_22	101480	No	NA	103	13	1	Complete	High-quality	100	DTR
H49_idba_23	101282	No	NA	98	15	1	Complete	High-quality	100	DTR
H49_idba_26	97664	No	NA	83	8	0	Complete	High-quality	100	DTR
H49_idba_27	94002	No	NA	87	10	5	High-quality	High-quality	97.8	AAI-based
H49_idba_29	93127	No	NA	69	13	1	High-quality	High-quality	92.32	AAI-based
H49_idba_31	91452	No	NA	86	10	0	Complete	High-quality	100	DTR
H49_idba_36	83482	No	NA	109	13	1	High-quality	High-quality	96.38	AAI-based
H49_idba_39	80005	Yes	73848	137	17	5	Complete	High-quality	100	DTR
H49_idba_41	77774	No	NA	97	12	0	High-quality	High-quality	94.86	AAI-based
H49_idba_52	64072	No	NA	63	21	9	High-quality	High-quality	100	AAI-based
H49_idba_57	61818	No	NA	82	18	0	Complete	High-quality	100	DTR
H49_idba_59	60575	No	NA	68	24	0	High-quality	High-quality	97.09	AAI-based
H49_idba_60	60414	No	NA	82	16	0	Complete	High-quality	100	DTR
H49_idba_65	58078	No	NA	86	12	4	Complete	High-quality	100	DTR
H49_idba_69	56291	No	NA	102	14	3	High-quality	High-quality	97.6	AAI-based
H49_idba_70	55206	No	NA	103	20	1	Complete	High-quality	100	DTR
H49_idba_72	54497	No	NA	86	15	1	Complete	High-quality	100	DTR
H49_idba_80	53242	No	NA	59	17	0	High-quality	High-quality	91.87	AAI-based
H49_idba_86	49367	Yes	37164	62	27	8	High-quality	High-quality	93.46	AAI-based
H49_idba_88	48816	No	NA	76	26	0	High-quality	High-quality	100	AAI-based
H49_idba_92	47338	No	NA	76	17	0	Complete	High-quality	100	DTR
H49_idba_93	47233	No	NA	78	27	0	Complete	High-quality	100	DTR
H49_idba_94	47166	No	NA	56	4	1	High-quality	High-quality	100	AAI-based
H49_idba_95	46736	No	NA	78	50	0	Complete	High-quality	100	DTR
H49_idba_100	45941	No	NA	71	20	1	High-quality	High-quality	96.85	AAI-based
H49_idba_109	42116	No	NA	66	16	1	High-quality	High-quality	93.84	AAI-based
H49_idba_110	41865	No	NA	77	17	1	High-quality	High-quality	98.77	AAI-based
H49_idba_112	41269	No	NA	70	25	1	High-quality	High-quality	95.22	AAI-based
H49_idba_113	41254	No	NA	71	12	0	Complete	High-quality	100	DTR
H49_idba_114	40988	No	NA	59	30	0	High-quality	High-quality	98.59	AAI-based
H49_idba_115	40846	No	NA	52	6	2	High-quality	High-quality	96.8	AAI-based
H49_idba_118	40582	No	NA	69	21	3	Complete	High-quality	100	DTR
H49_idba_121	40008	No	NA	54	23	1	Complete	High-quality	100	DTR
H49_idba_124	39839	No	NA	63	20	1	Complete	High-quality	100	DTR
H49_idba_135	38497	No	NA	52	13	0	Complete	High-quality	100	DTR
H49_idba_136	38361	No	NA	64	29	0	Complete	High-quality	100	DTR
H49_idba_137	37999	No	NA	60	20	2	Complete	High-quality	100	DTR
H49_idba_138	37760	No	NA	50	8	1	Complete	High-quality	100	DTR
H49_idba_143	36687	Yes	34476	62	19	2	High-quality	High-quality	92.5	AAI-based
H49_idba_145	36447	No	NA	55	20	1	Complete	High-quality	100	DTR
H49_idba_146	36429	No	NA	48	15	0	High-quality	High-quality	99.25	AAI-based
H49_idba_148	36368	No	NA	54	16	0	Complete	High-quality	100	DTR
H49_idba_150	36219	No	NA	52	13	0	High-quality	High-quality	93.51	AAI-based
H49_idba_151	36217	No	NA	43	17	3	High-quality	High-quality	100	AAI-based
H49_idba_154	35681	No	NA	59	7	0	Complete	High-quality	100	DTR
H49_idba_156	35349	No	NA	50	12	0	Complete	High-quality	100	DTR
H49_idba_159	35303	No	NA	57	21	0	High-quality	High-quality	100	AAI-based
H49_idba_161	35188	No	NA	54	14	1	Complete	High-quality	100	DTR
H49_idba_164	34422	No	NA	57	18	0	High-quality	High-quality	96.43	AAI-based
H49_idba_165	33672	No	NA	61	21	0	High-quality	High-quality	100	AAI-based
H49_idba_171	32782	No	NA	63	18	1	Complete	High-quality	100	DTR
H49_idba_172	32731	No	NA	54	15	0	High-quality	High-quality	96.51	AAI-based
H49_idba_184	31475	Yes	27744	50	18	3	Complete	High-quality	100	DTR
H49_idba_192	30731	No	NA	45	13	0	High-quality	High-quality	91.35	AAI-based
H49_idba_202	29598	No	NA	44	14	1	Complete	High-quality	100	DTR
H49_idba_241	25681	No	NA	42	20	0	High-quality	High-quality	97.41	AAI-based
H49_idba_502	13862	No	NA	22	5	0	High-quality	High-quality	100	AAI-based
H49_idba_527	13322	No	NA	19	6	0	Complete	High-quality	100	ITR
H50_idba_20	149958	No	NA	211	38	5	Complete	High-quality	100	DTR
H50_idba_23	146993	No	NA	213	40	4	Complete	High-quality	100	DTR
H50_idba_52	101830	No	NA	104	16	1	Complete	High-quality	100	DTR
H50_idba_114	74246	No	NA	73	1	43	High-quality	High-quality	100	AAI-based
H50_idba_120	69622	No	NA	106	16	2	Complete	High-quality	100	DTR
H50_idba_124	67481	Yes	48864	87	22	9	High-quality	High-quality	100	AAI-based
H50_idba_135	64530	No	NA	99	29	0	Complete	High-quality	100	DTR
H50_idba_187	55530	No	NA	83	14	2	Complete	High-quality	100	DTR
H50_idba_198	53976	No	NA	96	21	1	High-quality	High-quality	100	AAI-based
H50_idba_203	53235	No	NA	96	20	0	High-quality	High-quality	100	AAI-based
H50_idba_231	49045	No	NA	72	21	0	High-quality	High-quality	100	AAI-based
H50_idba_244	47728	No	NA	71	29	1	Complete	High-quality	100	ITR
H50_idba_250	47103	No	NA	71	29	2	Complete	High-quality	100	DTR
H50_idba_251	47031	No	NA	63	17	1	Complete	High-quality	100	DTR
H50_idba_274	44360	No	NA	60	42	0	Complete	High-quality	100	DTR
H50_idba_275	44168	No	NA	46	5	3	High-quality	High-quality	100	AAI-based
H50_idba_280	43853	No	NA	72	16	0	Complete	High-quality	100	DTR
H50_idba_286	43614	No	NA	66	18	2	Complete	High-quality	100	DTR
H50_idba_296	42556	No	NA	70	19	1	Complete	High-quality	100	DTR
H50_idba_299	42325	No	NA	53	4	1	Complete	High-quality	100	DTR
H50_idba_308	41189	No	NA	63	23	3	High-quality	High-quality	99.15	AAI-based
H50_idba_309	41143	No	NA	65	29	2	Complete	High-quality	100	DTR
H50_idba_311	40946	Yes	39180	71	23	2	Complete	High-quality	100	DTR
H50_idba_312	40906	No	NA	57	14	3	Complete	High-quality	100	DTR
H50_idba_313	40896	No	NA	63	22	0	Complete	High-quality	100	DTR
H50_idba_317	40456	No	NA	48	9	0	Complete	High-quality	100	DTR
H50_idba_320	40256	No	NA	51	9	0	Complete	High-quality	100	DTR
H50_idba_324	40158	No	NA	63	18	0	Complete	High-quality	100	DTR
H50_idba_326	39854	No	NA	51	25	0	High-quality	High-quality	93.64	AAI-based
H50_idba_333	39202	No	NA	46	5	0	High-quality	High-quality	100	AAI-based
H50_idba_337	38783	No	NA	57	18	0	Complete	High-quality	100	DTR
H50_idba_340	38648	No	NA	57	23	0	Complete	High-quality	100	DTR
H50_idba_346	38032	No	NA	53	21	0	Complete	High-quality	100	DTR
H50_idba_347	37993	No	NA	57	28	0	Complete	High-quality	100	DTR
H50_idba_358	36708	No	NA	59	21	1	Complete	High-quality	100	DTR
H50_idba_362	36066	No	NA	59	17	3	Complete	High-quality	100	DTR
H50_idba_377	35055	No	NA	47	19	0	Complete	High-quality	100	DTR
H50_idba_378	35049	No	NA	48	19	0	High-quality	High-quality	100	AAI-based
H50_idba_383	34571	No	NA	47	20	1	Complete	High-quality	100	DTR
[truncated: 35,791 more rows]

## Sheet: Nr-hq-vOTUs
contig_id	contig_length	provirus	proviral_length	gene_count	viral_genes	host_genes	checkv_quality	miuvig_quality	completeness	completeness_method
A01_idba_3	173053	No	NA	201	45	4	Complete	High-quality	100	DTR
A01_idba_16	138392	No	NA	184	34	7	Complete	High-quality	100	DTR
A01_idba_37	98901	No	NA	116	18	1	High-quality	High-quality	99.84	AAI-based
A01_idba_60	79215	No	NA	107	11	1	Complete	High-quality	100	DTR
A01_idba_61	78986	No	NA	95	12	0	Complete	High-quality	100	DTR
A01_idba_91	63294	No	NA	97	31	1	High-quality	High-quality	98.14	AAI-based
A01_idba_102	59718	No	NA	87	36	0	Complete	High-quality	100	DTR
A01_idba_109	58341	No	NA	107	17	1	High-quality	High-quality	100	AAI-based
A01_idba_126	53834	No	NA	82	22	2	Complete	High-quality	100	DTR
A01_idba_131	52975	No	NA	82	29	0	Complete	High-quality	100	DTR
A01_idba_132	51932	No	NA	81	14	0	Complete	High-quality	100	DTR
A01_idba_137	50720	No	NA	87	18	0	High-quality	High-quality	99.56	AAI-based
A01_idba_157	47026	No	NA	62	16	0	Complete	High-quality	100	DTR
A01_idba_159	46274	No	NA	78	18	1	High-quality	High-quality	100	AAI-based
A01_idba_163	46069	No	NA	79	16	0	Complete	High-quality	100	DTR
A01_idba_175	44836	No	NA	81	13	1	High-quality	High-quality	100	AAI-based
A01_idba_191	42868	No	NA	51	7	1	High-quality	High-quality	94.91	AAI-based
A01_idba_217	39570	No	NA	49	10	1	Complete	High-quality	100	DTR
A01_idba_231	38341	No	NA	47	7	0	Complete	High-quality	100	DTR
A01_idba_239	37322	No	NA	58	23	0	High-quality	High-quality	100	AAI-based
A01_idba_251	35933	No	NA	45	10	1	Complete	High-quality	100	DTR
A01_idba_256	35296	No	NA	51	20	0	Complete	High-quality	100	DTR
A01_idba_258	35225	No	NA	55	15	0	Complete	High-quality	100	DTR
A01_idba_259	35184	No	NA	60	19	1	Complete	High-quality	100	DTR
A02_idba_8	170458	No	NA	177	26	6	Complete	High-quality	100	DTR
A02_idba_41	101874	No	NA	85	1	48	High-quality	High-quality	100	HMM-based
A02_idba_49	94513	No	NA	134	22	1	Complete	High-quality	100	DTR
A02_idba_51	94028	No	NA	94	11	1	Complete	High-quality	100	DTR
A02_idba_83	70804	No	NA	104	15	3	High-quality	High-quality	100	AAI-based
A02_idba_101	65410	No	NA	109	29	1	High-quality	High-quality	100	AAI-based						idba	NGS
A02_idba_113	62020	No	NA	99	17	2	Complete	High-quality	100	DTR
A02_idba_121	60815	No	NA	78	20	0	High-quality	High-quality	100	AAI-based
A02_idba_124	59912	No	NA	81	32	1	High-quality	High-quality	100	AAI-based
A02_idba_142	55905	Yes	54766	64	11	5	High-quality	High-quality	100	AAI-based
A02_idba_174	50371	No	NA	90	18	1	Complete	High-quality	100	DTR
A02_idba_186	48837	No	NA	67	12	1	Complete	High-quality	100	DTR
A02_idba_194	47884	No	NA	69	18	1	High-quality	High-quality	92.74	AAI-based
A02_idba_208	45682	No	NA	73	23	0	Complete	High-quality	100	DTR
A02_idba_209	45531	No	NA	61	11	1	Complete	High-quality	100	DTR
A02_idba_212	44778	Yes	42044	69	9	4	Complete	High-quality	100	DTR
A02_idba_223	43861	No	NA	64	20	1	Complete	High-quality	100	DTR
A02_idba_232	42603	No	NA	55	13	1	Complete	High-quality	100	DTR
A02_idba_234	42490	No	NA	44	14	0	Complete	High-quality	100	DTR
A02_idba_235	42453	No	NA	66	27	1	Complete	High-quality	100	DTR
A02_idba_246	41156	No	NA	56	24	0	Complete	High-quality	100	DTR
A02_idba_247	40998	No	NA	64	20	0	Complete	High-quality	100	DTR
A02_idba_250	40911	No	NA	43	10	0	High-quality	High-quality	99.06	AAI-based
A02_idba_254	40758	No	NA	77	17	1	Complete	High-quality	100	DTR
A02_idba_267	40006	No	NA	53	7	0	Complete	High-quality	100	DTR
A02_idba_269	39932	No	NA	48	6	0	High-quality	High-quality	93.53	AAI-based
A02_idba_274	39667	No	NA	55	15	1	Complete	High-quality	100	DTR
A02_idba_307	36926	No	NA	55	17	0	High-quality	High-quality	100	AAI-based
A02_idba_311	35977	No	NA	53	24	0	High-quality	High-quality	100	AAI-based
A02_idba_324	35196	No	NA	52	14	1	High-quality	High-quality	97.96	AAI-based
A02_idba_328	34833	No	NA	50	15	0	Complete	High-quality	100	DTR
A02_idba_2333	5075	No	NA	10	0	0	Complete	High-quality	100	DTR						genes	detected	idba	NGS
A08_idba_157	39624	No	NA	55	10	0	Complete	High-quality	100	DTR
A08_idba_165	38802	No	NA	51	17	0	Complete	High-quality	100	DTR
A08_idba_181	37269	No	NA	50	11	0	Complete	High-quality	100	DTR
A09_idba_53	73967	No	NA	115	17	0	High-quality	High-quality	100	AAI-based
A09_idba_68	60485	No	NA	53	6	3	High-quality	High-quality	92.59	AAI-based
A09_idba_69	60045	No	NA	100	23	3	Complete	High-quality	100	DTR
A09_idba_81	53423	No	NA	80	29	0	High-quality	High-quality	100	AAI-based
A09_idba_86	52593	No	NA	99	18	0	Complete	High-quality	100	DTR
A09_idba_93	51142	No	NA	74	19	0	Complete	High-quality	100	DTR
A09_idba_96	49482	No	NA	92	22	0	Complete	High-quality	100	DTR
A09_idba_100	47982	No	NA	82	19	1	Complete	High-quality	100	DTR
A09_idba_113	43921	No	NA	57	7	0	Complete	High-quality	100	DTR
A09_idba_119	43209	No	NA	81	17	1	Complete	High-quality	100	DTR
A09_idba_129	41971	No	NA	65	16	0	High-quality	High-quality	100	AAI-based
A09_idba_152	37346	No	NA	58	17	0	High-quality	High-quality	100	AAI-based
A09_idba_164	35739	No	NA	51	20	0	Complete	High-quality	100	DTR
A09_idba_166	35685	No	NA	39	3	0	High-quality	High-quality	93.86	AAI-based
A09_idba_178	34109	No	NA	48	14	0	Complete	High-quality	100	DTR
A09_idba_182	33691	No	NA	56	16	0	High-quality	High-quality	100	AAI-based
A107_idba_16	137342	Yes	131804	179	36	5	Complete	High-quality	100	DTR
A107_idba_31	110909	No	NA	98	1	75	High-quality	High-quality	100	HMM-based
A107_idba_39	98473	No	NA	121	17	3	Complete	High-quality	100	DTR
A107_idba_60	76618	No	NA	112	27	2	High-quality	High-quality	95.32	AAI-based
A107_idba_65	75081	No	NA	105	45	4	High-quality	High-quality	100	AAI-based
A107_idba_78	67639	No	NA	103	29	4	Complete	High-quality	100	DTR
A107_idba_99	54000	No	NA	93	21	0	Complete	High-quality	100	DTR
A107_idba_106	49998	No	NA	65	13	1	High-quality	High-quality	100	AAI-based
A107_idba_115	45758	No	NA	67	14	1	Complete	High-quality	100	DTR
A107_idba_124	42074	No	NA	46	10	1	Complete	High-quality	100	DTR
A107_idba_128	40821	No	NA	59	27	2	Complete	High-quality	100	DTR
A107_idba_131	40503	No	NA	61	14	0	Complete	High-quality	100	DTR
A107_idba_132	40335	No	NA	61	26	0	Complete	High-quality	100	DTR
A107_idba_135	38987	No	NA	55	10	0	Complete	High-quality	100	DTR
A107_idba_137	38818	No	NA	46	12	1	Complete	High-quality	100	DTR
A107_idba_138	38751	No	NA	57	13	2	High-quality	High-quality	94.88	AAI-based
A107_idba_139	38736	No	NA	51	26	2	High-quality	High-quality	94.96	AAI-based
A107_idba_190	29323	No	NA	47	21	0	Complete	High-quality	100	DTR
A11_idba_2	177488	No	NA	202	31	4	Complete	High-quality	100	DTR
A11_idba_33	87363	No	NA	115	14	2	Complete	High-quality	100	DTR
A11_idba_34	85819	No	NA	132	41	2	Complete	High-quality	100	DTR
A11_idba_47	72583	No	NA	93	20	7	Complete	High-quality	100	DTR
A11_idba_50	71059	No	NA	111	15	5	Complete	High-quality	100	DTR
A11_idba_62	63166	No	NA	86	22	0	Complete	High-quality	100	DTR
A11_idba_83	53819	No	NA	95	16	1	Complete	High-quality	100	DTR
A11_idba_86	53650	No	NA	73	30	0	Complete	High-quality	100	DTR
A11_idba_128	45760	No	NA	68	10	0	Complete	High-quality	100	DTR
A11_idba_134	44636	No	NA	72	18	0	Complete	High-quality	100	DTR
A11_idba_144	43017	No	NA	68	28	0	Complete	High-quality	100	DTR
A11_idba_146	42804	No	NA	62	25	0	Complete	High-quality	100	DTR
A11_idba_152	41966	No	NA	70	25	2	Complete	High-quality	100	DTR
A11_idba_173	39708	No	NA	66	17	0	Complete	High-quality	100	DTR
A11_idba_176	39495	No	NA	55	13	1	High-quality	High-quality	100	AAI-based
A11_idba_215	34889	No	NA	50	15	0	High-quality	High-quality	95.81	AAI-based
A11_idba_691	14319	No	NA	24	2	0	Complete	High-quality	100	DTR
A13_idba_9	167163	Yes	109711	205	28	28	Complete	High-quality	100	Provirus
A13_idba_22	115388	No	NA	103	1	63	High-quality	High-quality	100	HMM-based
A13_idba_61	59057	No	NA	85	13	4	Complete	High-quality	100	ITR
A13_idba_67	54846	No	NA	76	24	1	Complete	High-quality	100	DTR
A13_idba_85	45233	No	NA	58	10	1	Complete	High-quality	100	DTR
A13_idba_92	43453	No	NA	70	22	0	Complete	High-quality	100	DTR
A13_idba_94	42764	No	NA	55	11	0	Complete	High-quality	100	DTR
A13_idba_95	42550	No	NA	58	16	0	Complete	High-quality	100	DTR
A13_idba_96	42508	No	NA	65	18	1	High-quality	High-quality	94.71	AAI-based
A13_idba_99	42103	No	NA	61	13	1	Complete	High-quality	100	DTR
A13_idba_111	40092	No	NA	60	12	1	Complete	High-quality	100	DTR
A13_idba_127	38220	No	NA	59	17	0	High-quality	High-quality	98.52	AAI-based
A13_idba_158	33725	No	NA	41	16	0	High-quality	High-quality	93.7	AAI-based
A13_idba_442	12585	No	NA	23	1	0	Complete	High-quality	100	DTR
A16_idba_11	176380	No	NA	153	3	103	High-quality	High-quality	91.12	HMM-based
A16_idba_210	56143	No	NA	90	14	1	Complete	High-quality	100	DTR
A16_idba_304	45740	No	NA	67	15	1	Complete	High-quality	100	DTR
A16_idba_315	45223	No	NA	70	21	0	High-quality	High-quality	95.85	AAI-based
A16_idba_317	45142	No	NA	57	17	1	High-quality	High-quality	100	AAI-based
A16_idba_330	44223	No	NA	66	26	1	High-quality	High-quality	100	AAI-based
A16_idba_365	41892	No	NA	47	12	1	Complete	High-quality	100	DTR
A16_idba_382	40710	No	NA	73	15	0	Complete	High-quality	100	DTR
A16_idba_406	38775	No	NA	55	26	0	Complete	High-quality	100	DTR
A16_idba_417	38470	Yes	36039	61	14	3	High-quality	High-quality	100	AAI-based
A16_idba_434	37117	No	NA	49	16	2	Complete	High-quality	100	DTR
A16_idba_446	36379	No	NA	58	17	0	High-quality	High-quality	94.19	AAI-based
A16_idba_2139	7912	No	NA	10	1	0	High-quality	High-quality	100	HMM-based
B03_idba_20	101193	No	NA	108	21	0	Complete	High-quality	100	DTR
B03_idba_23	90304	No	NA	142	17	2	High-quality	High-quality	100	AAI-based
B03_idba_40	64866	No	NA	87	19	0	Complete	High-quality	100	DTR
B03_idba_43	62645	No	NA	95	22	1	High-quality	High-quality	100	AAI-based
B03_idba_46	60548	No	NA	79	33	0	High-quality	High-quality	100	AAI-based
B03_idba_60	55144	No	NA	85	23	1	Complete	High-quality	100	DTR
B03_idba_66	52321	No	NA	79	19	1	Complete	High-quality	100	DTR
B03_idba_84	45995	No	NA	73	22	0	Complete	High-quality	100	DTR
B03_idba_96	44140	No	NA	55	7	1	Complete	High-quality	100	DTR
B03_idba_97	43816	No	NA	73	20	0	Complete	High-quality	100	DTR
B03_idba_100	43106	No	NA	62	18	1	Complete	High-quality	100	DTR
B03_idba_104	42270	No	NA	77	17	0	High-quality	High-quality	100	AAI-based
B03_idba_105	42040	No	NA	56	14	0	Complete	High-quality	100	DTR
B03_idba_135	38468	No	NA	56	21	0	Complete	High-quality	100	DTR
B03_idba_140	37602	No	NA	58	21	0	Complete	High-quality	100	DTR
B03_idba_149	36784	No	NA	49	20	0	Complete	High-quality	100	DTR
B03_idba_162	34923	No	NA	63	18	0	Complete	High-quality	100	DTR
B03_idba_165	34690	No	NA	53	15	1	Complete	High-quality	100	DTR
B03_idba_185	32216	No	NA	44	22	2	Complete	High-quality	100	DTR
B03_idba_189	31818	No	NA	49	17	0	High-quality	High-quality	91.39	AAI-based
B03_idba_192	31704	No	NA	61	15	0	High-quality	High-quality	97.41	AAI-based
B03_idba_197	31062	No	NA	51	11	1	Complete	High-quality	100	DTR
B03_idba_843	11502	No	NA	17	2	1	Complete	High-quality	100	DTR
B13_idba_2	175113	No	NA	148	5	94	High-quality	High-quality	100	HMM-based
B13_idba_4	170595	No	NA	179	27	7	Complete	High-quality	100	DTR
B13_idba_12	124088	No	NA	154	38	4	Complete	High-quality	100	DTR
B13_idba_24	98054	No	NA	97	11	1	Complete	High-quality	100	DTR
B13_idba_35	75971	No	NA	97	11	0	High-quality	High-quality	93.93	AAI-based
B13_idba_87	51627	No	NA	79	20	1	Complete	High-quality	100	DTR
B13_idba_115	45277	No	NA	75	29	0	Complete	High-quality	100	DTR
B13_idba_118	44626	No	NA	78	14	4	High-quality	High-quality	100	AAI-based
B13_idba_120	44348	No	NA	71	12	1	Complete	High-quality	100	DTR
B13_idba_123	43949	No	NA	78	17	0	Complete	High-quality	100	DTR
B13_idba_132	42503	No	NA	48	9	1	High-quality	High-quality	96.7	AAI-based
B13_idba_133	42471	No	NA	63	20	0	Complete	High-quality	100	DTR
B13_idba_137	42180	No	NA	42	10	0	Complete	High-quality	100	DTR
B13_idba_140	41999	No	NA	45	7	1	Complete	High-quality	100	DTR
B13_idba_142	41899	No	NA	43	6	1	Complete	High-quality	100	DTR
B13_idba_145	41479	No	NA	72	18	3	Complete	High-quality	100	DTR
B13_idba_175	38122	No	NA	63	14	0	Complete	High-quality	100	DTR
B13_idba_179	37791	No	NA	56	25	1	Complete	High-quality	100	DTR
B13_idba_190	37004	No	NA	52	7	3	High-quality	High-quality	93.63	AAI-based
B13_idba_203	35681	No	NA	56	18	0	High-quality	High-quality	100	AAI-based
B13_idba_211	35148	No	NA	55	20	1	High-quality	High-quality	100	AAI-based
B13_idba_239	32482	No	NA	61	18	0	Complete	High-quality	100	DTR
B13_idba_1824	6537	No	NA	8	2	0	Complete	High-quality	100	DTR
DC05_idba_47	54503	No	NA	98	21	1	Complete	High-quality	100	DTR
DC05_idba_79	41130	No	NA	69	18	1	High-quality	High-quality	100	AAI-based
DC05_idba_86	38647	No	NA	55	18	0	Complete	High-quality	100	DTR
DC05_idba_91	38064	No	NA	50	10	0	Complete	High-quality	100	DTR
DC05_idba_98	36542	No	NA	50	25	1	Complete	High-quality	100	DTR
DC13_idba_82	59039	No	NA	99	18	0	Complete	High-quality	100	DTR
DC13_idba_98	52680	No	NA	81	13	1	High-quality	High-quality	93.63	AAI-based
DC13_idba_115	48372	No	NA	64	12	1	Complete	High-quality	100	ITR
DC13_idba_118	48109	No	NA	46	0	17	High-quality	High-quality	100	AAI-based						genes	detected	idba	NGS
DC13_idba_147	42855	No	NA	54	8	2	Complete	High-quality	100	DTR
DC13_idba_150	42492	No	NA	63	27	2	Complete	High-quality	100	DTR
DC13_idba_167	40502	No	NA	55	14	1	Complete	High-quality	100	DTR
DC13_idba_171	40196	No	NA	59	16	1	Complete	High-quality	100	DTR
DC13_idba_176	39783	No	NA	44	10	0	High-quality	High-quality	99.88	AAI-based
DC13_idba_183	39083	No	NA	69	16	0	Complete	High-quality	100	DTR
DC13_idba_195	37756	No	NA	55	16	0	High-quality	High-quality	92.72	AAI-based
DC13_idba_206	36969	No	NA	47	23	0	Complete	High-quality	100	DTR
DC13_idba_215	36268	No	NA	50	16	1	Complete	High-quality	100	DTR
DC13_idba_220	35833	No	NA	61	24	2	High-quality	High-quality	100	AAI-based
DC13_idba_230	34571	No	NA	60	15	1	Complete	High-quality	100	DTR
DC13_idba_241	33710	No	NA	53	12	0	Complete	High-quality	100	DTR
DC13_idba_641	17419	No	NA	28	6	0	High-quality	High-quality	100	AAI-based
DC16_idba_3	234364	No	NA	226	1	160	High-quality	High-quality	95.26	HMM-based
DC16_idba_87	53552	No	NA	76	5	3	Complete	High-quality	100	DTR
DC16_idba_99	50665	No	NA	71	32	0	High-quality	High-quality	100	AAI-based
DC16_idba_107	48559	No	NA	67	22	0	Complete	High-quality	100	DTR
DC16_idba_109	48208	No	NA	66	24	1	Complete	High-quality	100	DTR
DC16_idba_110	48188	No	NA	64	12	1	Complete	High-quality	100	DTR
DC16_idba_119	45099	No	NA	57	29	0	Complete	High-quality	100	DTR
DC16_idba_130	44276	No	NA	82	15	2	Complete	High-quality	100	DTR
DC16_idba_131	44161	No	NA	60	27	0	Complete	High-quality	100	DTR
DC16_idba_148	41508	No	NA	69	19	0	Complete	High-quality	100	DTR
DC16_idba_152	40913	No	NA	48	45	0	Complete	High-quality	100	DTR
DC16_idba_217	33503	No	NA	49	17	1	Complete	High-quality	100	DTR
DC16_idba_972	8209	No	NA	13	1	0	High-quality	High-quality	100	AAI-based
DC23_idba_9	173642	No	NA	205	46	4	Complete	High-quality	100	DTR
DC23_idba_37	100644	No	NA	102	17	1	Complete	High-quality	100	DTR
DC23_idba_84	63096	No	NA	62	1	21	High-quality	High-quality	95.47	HMM-based
DC23_idba_120	53070	No	NA	96	17	1	Complete	High-quality	100	DTR
DC23_idba_135	49079	No	NA	64	12	1	Complete	High-quality	100	DTR
DC23_idba_142	46924	No	NA	69	22	1	Complete	High-quality	100	DTR
DC23_idba_151	45551	No	NA	75	19	0	Complete	High-quality	100	DTR
DC23_idba_152	45420	No	NA	83	16	0	Complete	High-quality	100	DTR
DC23_idba_161	44675	No	NA	75	18	1	High-quality	High-quality	100	AAI-based
DC23_idba_182	42575	No	NA	57	11	0	Complete	High-quality	100	DTR
DC23_idba_186	42024	No	NA	62	28	1	Complete	High-quality	100	DTR
DC23_idba_205	39467	No	NA	44	9	1	High-quality	High-quality	99.38	AAI-based
DC23_idba_217	38327	No	NA	42	5	1	Complete	High-quality	100	DTR
DC23_idba_244	36307	No	NA	62	14	1	High-quality	High-quality	94.96	AAI-based
DC25_idba_5	145716	No	NA	194	11	7	Complete	High-quality	100	DTR
DC25_idba_6	139808	No	NA	106	1	64	High-quality	High-quality	100	HMM-based
DC25_idba_25	85046	No	NA	109	12	2	Complete	High-quality	100	DTR
DC25_idba_56	60261	No	NA	61	1	20	High-quality	High-quality	90.15	HMM-based
DC25_idba_97	45884	No	NA	51	6	1	Complete	High-quality	100	DTR
DC25_idba_106	42994	No	NA	68	25	0	Complete	High-quality	100	DTR
DC25_idba_137	36194	No	NA	49	9	1	Complete	High-quality	100	DTR
DC25_idba_150	34425	No	NA	47	12	0	Complete	High-quality	100	DTR
DC25_idba_153	34213	No	NA	50	20	1	Complete	High-quality	100	DTR
DC26_idba_18	158734	No	NA	138	5	76	High-quality	High-quality	100	HMM-based
DC26_idba_124	67924	No	NA	104	28	4	Complete	High-quality	100	DTR
DC26_idba_236	46557	Yes	35612	56	24	10	High-quality	High-quality	100	AAI-based
DC26_idba_245	45548	No	NA	69	17	0	Complete	High-quality	100	DTR
DC26_idba_265	43928	No	NA	72	25	0	Complete	High-quality	100	DTR
DC26_idba_274	43291	No	NA	68	26	0	Complete	High-quality	100	DTR
DC26_idba_279	42600	No	NA	67	7	0	Complete	High-quality	100	DTR
DC26_idba_282	42518	No	NA	56	19	0	Complete	High-quality	100	DTR
DC26_idba_285	42369	No	NA	67	17	1	Complete	High-quality	100	DTR
DC26_idba_299	41044	No	NA	50	8	0	Complete	High-quality	100	DTR
DC26_idba_300	41039	No	NA	50	27	1	Complete	High-quality	100	DTR
DC26_idba_301	41014	No	NA	55	19	0	High-quality	High-quality	99.39	AAI-based
DC26_idba_302	40942	No	NA	58	9	3	Complete	High-quality	100	DTR
DC26_idba_308	40410	No	NA	81	19	0	Complete	High-quality	100	DTR
DC26_idba_312	40063	No	NA	70	25	0	Complete	High-quality	100	DTR
DC26_idba_326	38666	No	NA	59	22	0	Complete	High-quality	100	DTR
DC26_idba_328	38487	No	NA	48	9	0	Complete	High-quality	100	ITR
DC26_idba_334	37922	No	NA	58	18	1	Complete	High-quality	100	DTR
DC26_idba_348	36770	No	NA	51	10	0	Complete	High-quality	100	DTR
DC26_idba_361	36096	No	NA	40	4	0	Complete	High-quality	100	DTR
DC26_idba_378	35003	No	NA	61	23	2	Complete	High-quality	100	DTR
DC26_idba_396	33771	No	NA	46	21	1	High-quality	High-quality	97.91	AAI-based
DC26_idba_398	33651	No	NA	46	13	0	Complete	High-quality	100	DTR
DC26_idba_430	31162	No	NA	45	13	1	Complete	High-quality	100	DTR
DC26_idba_492	27786	No	NA	45	18	0	Complete	High-quality	100	DTR
DC26_idba_998	14433	No	NA	18	4	0	Complete	High-quality	100	ITR
DC26_idba_1319	10557	No	NA	20	3	0	Complete	High-quality	100	DTR
DC27_idba_23	100718	No	NA	103	15	1	High-quality	High-quality	99.27	AAI-based
DC27_idba_65	62608	No	NA	101	22	1	Complete	High-quality	100	DTR
DC27_idba_73	59537	No	NA	93	31	1	Complete	High-quality	100	DTR
DC27_idba_79	58341	No	NA	85	15	2	Complete	High-quality	100	DTR
DC27_idba_82	57831	No	NA	72	15	4	Complete	High-quality	100	DTR
DC27_idba_87	56416	No	NA	89	21	2	High-quality	High-quality	100	AAI-based
DC27_idba_89	54018	No	NA	79	19	3	High-quality	High-quality	91.19	AAI-based
DC27_idba_92	53060	No	NA	96	18	1	Complete	High-quality	100	DTR
DC27_idba_108	49585	No	NA	92	21	0	Complete	High-quality	100	DTR
DC27_idba_123	46740	No	NA	74	21	1	Complete	High-quality	100	DTR
DC27_idba_131	45927	No	NA	52	1	22	High-quality	High-quality	100	AAI-based
DC27_idba_138	45022	No	NA	69	33	0	High-quality	High-quality	98.76	AAI-based
DC27_idba_141	44872	No	NA	60	29	1	High-quality	High-quality	99.36	AAI-based
DC27_idba_146	44163	No	NA	86	16	1	Complete	High-quality	100	DTR
DC27_idba_152	43785	No	NA	69	13	1	High-quality	High-quality	100	AAI-based
DC27_idba_154	43379	No	NA	56	10	0	Complete	High-quality	100	DTR
DC27_idba_162	42250	No	NA	69	17	0	Complete	High-quality	100	DTR
DC27_idba_175	40591	No	NA	66	24	2	Complete	High-quality	100	DTR
DC27_idba_178	40182	No	NA	60	29	0	Complete	High-quality	100	DTR
DC27_idba_180	40142	No	NA	52	31	0	Complete	High-quality	100	DTR
DC27_idba_189	39627	No	NA	52	6	2	High-quality	High-quality	92.7	AAI-based
DC27_idba_193	38927	No	NA	53	29	2	High-quality	High-quality	93.63	AAI-based
DC27_idba_194	38896	No	NA	47	25	1	Complete	High-quality	100	DTR
DC27_idba_196	38746	No	NA	47	10	0	Complete	High-quality	100	ITR
DC27_idba_222	36937	No	NA	41	12	0	Complete	High-quality	100	DTR
DC27_idba_243	35373	No	NA	50	3	0	Complete	High-quality	100	DTR
DC27_idba_263	34287	No	NA	61	15	1	High-quality	High-quality	100	AAI-based
DC27_idba_265	34239	No	NA	48	14	0	Complete	High-quality	100	DTR
DC27_idba_359	27947	No	NA	43	15	0	High-quality	High-quality	93.89	AAI-based
H01_idba_6	182284	No	NA	143	2	80	High-quality	High-quality	100	HMM-based
H01_idba_8	175802	No	NA	158	1	117	High-quality	High-quality	100	HMM-based
H01_idba_93	66716	No	NA	100	27	4	Complete	High-quality	100	DTR
H01_idba_121	61401	No	NA	74	14	1	High-quality	High-quality	100	AAI-based
H01_idba_126	60812	No	NA	78	18	0	High-quality	High-quality	100	AAI-based
H01_idba_142	57124	No	NA	82	27	1	Complete	High-quality	100	DTR
H01_idba_161	53789	No	NA	93	26	0	Complete	High-quality	100	DTR
H01_idba_180	48327	No	NA	61	21	0	Complete	High-quality	100	DTR
H01_idba_198	45008	No	NA	62	29	0	Complete	High-quality	100	DTR
H01_idba_203	44441	No	NA	64	6	2	Complete	High-quality	100	DTR
H01_idba_210	43933	No	NA	49	31	0	Complete	High-quality	100	DTR
H01_idba_220	42847	No	NA	64	7	0	Complete	High-quality	100	DTR
H01_idba_228	42009	No	NA	70	23	0	Complete	High-quality	100	DTR
H01_idba_230	41682	No	NA	59	21	1	Complete	High-quality	100	DTR
H01_idba_235	41343	No	NA	59	11	0	Complete	High-quality	100	DTR
H01_idba_242	40768	No	NA	53	3	1	Complete	High-quality	100	DTR
H01_idba_244	40635	No	NA	57	21	2	Complete	High-quality	100	DTR
H01_idba_255	39899	No	NA	59	23	1	High-quality	High-quality	93.6	AAI-based
H01_idba_277	37825	No	NA	58	13	0	High-quality	High-quality	92.23	AAI-based
H01_idba_278	37765	No	NA	53	9	0	High-quality	High-quality	97.26	AAI-based
H01_idba_290	36768	No	NA	49	16	1	Complete	High-quality	100	DTR
H01_idba_296	36601	No	NA	52	13	0	Complete	High-quality	100	DTR
H01_idba_299	36502	No	NA	54	12	2	High-quality	High-quality	100	AAI-based
H01_idba_338	33962	No	NA	53	19	1	Complete	High-quality	100	DTR
H01_idba_341	33887	No	NA	59	15	0	High-quality	High-quality	94.78	AAI-based
H01_idba_342	33840	No	NA	54	23	1	Complete	High-quality	100	DTR
H01_idba_390	30668	No	NA	46	16	1	High-quality	High-quality	95.85	AAI-based
H01_idba_410	29661	No	NA	42	15	1	Complete	High-quality	100	DTR
H01_idba_1854	5874	No	NA	7	3	0	Complete	High-quality	100	DTR
H02_idba_21	45684	No	NA	80	21	0	Complete	High-quality	100	DTR
H02_idba_27	42831	No	NA	71	17	0	Complete	High-quality	100	DTR
H02_idba_65	31106	No	NA	47	13	0	Complete	High-quality	100	ITR
H03_idba_32	65675	No	NA	67	13	2	High-quality	High-quality	100	AAI-based
H03_idba_44	59981	No	NA	95	32	0	Complete	High-quality	100	DTR
H03_idba_63	50326	No	NA	82	23	1	Complete	High-quality	100	DTR
H03_idba_77	45304	No	NA	59	18	0	Complete	High-quality	100	DTR
H03_idba_86	42420	No	NA	61	17	2	Complete	High-quality	100	DTR
H03_idba_87	42316	No	NA	60	9	2	Complete	High-quality	100	DTR
H03_idba_90	42056	No	NA	70	14	1	Complete	High-quality	100	DTR
H03_idba_91	42018	No	NA	45	10	1	Complete	High-quality	100	DTR
H03_idba_98	39912	No	NA	54	17	0	Complete	High-quality	100	DTR
H03_idba_106	38410	No	NA	67	12	1	Complete	High-quality	100	DTR
H03_idba_107	38378	No	NA	66	13	0	High-quality	High-quality	91.93	AAI-based
H03_idba_119	36711	No	NA	62	9	0	Complete	High-quality	100	DTR
H03_idba_123	36054	No	NA	52	13	0	High-quality	High-quality	100	AAI-based
H03_idba_129	34686	No	NA	58	19	1	Complete	High-quality	100	DTR
H03_idba_132	34180	No	NA	51	10	1	High-quality	High-quality	92.85	AAI-based
H03_idba_134	33962	No	NA	55	20	1	Complete	High-quality	100	DTR
H03_idba_159	32270	No	NA	51	19	2	High-quality	High-quality	97.1	AAI-based
H03_idba_169	31119	No	NA	51	16	1	Complete	High-quality	100	DTR
H04_idba_6	128645	No	NA	181	34	3	High-quality	High-quality	95.14	AAI-based
H04_idba_18	87324	No	NA	111	14	2	Complete	High-quality	100	DTR
H04_idba_20	84473	No	NA	111	13	1	High-quality	High-quality	97.52	AAI-based
H04_idba_48	54277	No	NA	89	22	0	Complete	High-quality	100	DTR
H04_idba_54	52947	No	NA	72	31	2	Complete	High-quality	100	DTR
H04_idba_57	51415	No	NA	69	19	0	Complete	High-quality	100	DTR
H04_idba_66	45432	No	NA	80	24	0	Complete	High-quality	100	DTR
H04_idba_68	45195	No	NA	67	24	2	Complete	High-quality	100	DTR
H04_idba_71	44741	No	NA	71	25	0	Complete	High-quality	100	DTR
H04_idba_77	44154	No	NA	75	24	1	Complete	High-quality	100	DTR
H04_idba_78	43963	No	NA	56	25	1	Complete	High-quality	100	DTR
H04_idba_82	43632	No	NA	57	7	1	Complete	High-quality	100	DTR
H04_idba_88	42592	No	NA	74	20	0	Complete	High-quality	100	DTR
H04_idba_94	41980	No	NA	70	25	2	Complete	High-quality	100	ITR
H04_idba_95	41793	No	NA	55	7	0	Complete	High-quality	100	DTR
H04_idba_113	39756	No	NA	66	19	1	Complete	High-quality	100	DTR
H04_idba_116	39514	No	NA	69	21	0	Complete	High-quality	100	DTR
H04_idba_122	38515	No	NA	53	29	0	High-quality	High-quality	93.71	AAI-based
H04_idba_129	37988	No	NA	59	21	1	Complete	High-quality	100	DTR
H04_idba_130	37942	No	NA	67	35	0	Complete	High-quality	100	DTR
H04_idba_131	37799	No	NA	60	35	0	High-quality	High-quality	100	AAI-based
H04_idba_132	37739	No	NA	60	18	0	High-quality	High-quality	93.92	AAI-based
H04_idba_134	37526	No	NA	62	9	0	Complete	High-quality	100	DTR
H04_idba_150	35366	No	NA	45	25	1	Complete	High-quality	100	DTR
H04_idba_159	34459	No	NA	56	20	1	Complete	High-quality	100	DTR
H04_idba_160	34446	No	NA	53	15	2	Complete	High-quality	100	DTR
H04_idba_186	31344	No	NA	53	21	0	Complete	High-quality	100	ITR
H04_idba_188	31209	No	NA	54	15	0	High-quality	High-quality	97.13	AAI-based
H04_idba_192	30350	No	NA	44	15	0	Complete	High-quality	100	DTR
H04_idba_416	16957	No	NA	23	7	0	Complete	High-quality	100	ITR
H04_idba_1491	5554	No	NA	8	2	0	Complete	High-quality	100	DTR
H11_idba_19	156140	No	NA	239	40	4	Complete	High-quality	100	DTR
H11_idba_23	141844	No	NA	128	2	71	High-quality	High-quality	97.92	HMM-based
H11_idba_40	97806	No	NA	101	15	1	Complete	High-quality	100	DTR
H11_idba_44	96752	No	NA	105	13	0	High-quality	High-quality	98.15	AAI-based
H11_idba_45	96169	No	NA	81	7	0	Complete	High-quality	100	DTR
H11_idba_61	85300	No	NA	112	13	2	Complete	High-quality	100	DTR
H11_idba_64	84653	No	NA	144	19	2	Complete	High-quality	100	DTR
H11_idba_66	83600	No	NA	73	1	45	High-quality	High-quality	100	HMM-based
H11_idba_111	61468	No	NA	94	33	0	High-quality	High-quality	100	AAI-based
H11_idba_115	61023	No	NA	91	19	2	High-quality	High-quality	100	AAI-based
H11_idba_132	57720	Yes	41735	63	15	15	High-quality	High-quality	96.29	AAI-based
H11_idba_136	55937	No	NA	95	18	0	Complete	High-quality	100	DTR
H11_idba_162	51890	No	NA	69	12	1	Complete	High-quality	100	DTR
H11_idba_220	42516	No	NA	75	15	0	Complete	High-quality	100	DTR
H11_idba_273	36584	No	NA	47	10	1	Complete	High-quality	100	DTR
H11_idba_303	33833	No	NA	51	7	0	Complete	High-quality	100	DTR
H11_idba_316	32932	No	NA	56	17	1	Complete	High-quality	100	DTR
H11_idba_342	30746	No	NA	43	22	1	Complete	High-quality	100	DTR
H11_idba_451	26014	No	NA	29	0	13	High-quality	High-quality	100	AAI-based						genes	detected	idba	NGS
H12_idba_3	345015	No	NA	290	1	154	High-quality	High-quality	100	HMM-based
H12_idba_20	114735	No	NA	157	20	4	Complete	High-quality	100	DTR
H12_idba_23	105347	No	NA	127	18	4	Complete	High-quality	100	DTR
H12_idba_33	91943	No	NA	86	11	0	Complete	High-quality	100	DTR
H12_idba_48	74088	No	NA	125	25	2	High-quality	High-quality	91.9	AAI-based
H12_idba_65	62183	No	NA	105	14	2	Complete	High-quality	100	DTR
H12_idba_83	55293	No	NA	76	12	4	Complete	High-quality	100	DTR
H12_idba_85	53492	Yes	44608	57	9	6	High-quality	High-quality	94.21	AAI-based
H12_idba_105	46576	No	NA	61	11	1	Complete	High-quality	100	DTR
H12_idba_108	45244	No	NA	70	16	1	Complete	High-quality	100	DTR
H12_idba_144	38882	No	NA	66	24	1	High-quality	High-quality	100	AAI-based
H12_idba_158	37210	No	NA	71	20	0	Complete	High-quality	100	DTR
H12_idba_166	36307	No	NA	61	21	0	Complete	High-quality	100	DTR
H12_idba_188	33192	No	NA	59	22	1	Complete	High-quality	100	DTR
H12_idba_217	29402	No	NA	41	17	0	Complete	High-quality	100	DTR
H13_idba_5	272333	No	NA	226	5	134	High-quality	High-quality	100	HMM-based
H13_idba_13	212109	No	NA	298	40	7	Complete	High-quality	100	DTR
H13_idba_39	123036	No	NA	93	2	57	High-quality	High-quality	100	HMM-based
H13_idba_130	64262	No	NA	111	23	1	Complete	High-quality	100	DTR
H13_idba_143	61362	No	NA	92	22	2	Complete	High-quality	100	DTR
H13_idba_170	56026	No	NA	86	21	1	Complete	High-quality	100	DTR
H13_idba_184	50620	No	NA	81	34	1	Complete	High-quality	100	DTR
H13_idba_193	49857	No	NA	82	21	0	Complete	High-quality	100	DTR
H13_idba_239	43314	Yes	36618	63	20	3	High-quality	High-quality	100	AAI-based
H13_idba_250	42679	No	NA	68	17	1	Complete	High-quality	100	DTR
H13_idba_255	41910	Yes	37290	63	23	3	Complete	High-quality	100	DTR
H13_idba_260	41647	No	NA	63	17	0	Complete	High-quality	100	DTR
H13_idba_267	40927	No	NA	54	26	1	High-quality	High-quality	100	AAI-based
H13_idba_280	40003	No	NA	51	26	0	Complete	High-quality	100	DTR
H13_idba_297	38539	No	NA	54	8	1	Complete	High-quality	100	DTR
H13_idba_306	37641	No	NA	59	17	0	Complete	High-quality	100	DTR
H13_idba_308	37375	No	NA	59	18	1	Complete	High-quality	100	DTR
H13_idba_322	36574	No	NA	58	11	2	Complete	High-quality	100	ITR
H13_idba_326	36231	No	NA	55	14	2	Complete	High-quality	100	DTR
H13_idba_345	35106	No	NA	60	12	2	High-quality	High-quality	98.27	AAI-based
H13_idba_386	31908	No	NA	40	10	1	Complete	High-quality	100	DTR
H13_idba_398	31053	No	NA	43	20	1	Complete	High-quality	100	DTR
H13_idba_427	29074	No	NA	40	14	0	Complete	High-quality	100	DTR
H16_idba_10	136574	No	NA	116	5	72	High-quality	High-quality	97.6	HMM-based
H16_idba_45	61925	No	NA	91	33	1	Complete	High-quality	100	DTR
H16_idba_81	42728	No	NA	61	24	0	Complete	High-quality	100	DTR
H16_idba_84	41209	No	NA	40	3	16	High-quality	High-quality	100	AAI-based
H16_idba_99	39999	No	NA	57	28	0	High-quality	High-quality	90.59	AAI-based
H16_idba_112	37766	No	NA	61	15	0	Complete	High-quality	100	DTR
H16_idba_115	37447	No	NA	59	22	0	Complete	High-quality	100	DTR
H16_idba_140	33539	No	NA	40	6	0	Complete	High-quality	100	DTR
H16_idba_157	30808	No	NA	48	17	2	High-quality	High-quality	93.08	AAI-based
H19_idba_9	92794	No	NA	138	34	3	Complete	High-quality	100	DTR
H19_idba_10	91847	No	NA	130	35	2	Complete	High-quality	100	DTR
H19_idba_15	73869	No	NA	69	0	36	High-quality	High-quality	100	AAI-based						genes	detected	idba	NGS
H19_idba_30	60634	No	NA	78	32	0	High-quality	High-quality	97.62	AAI-based
H19_idba_31	60111	No	NA	90	15	3	Complete	High-quality	100	DTR
H19_idba_32	60082	No	NA	107	19	2	Complete	High-quality	100	DTR
H19_idba_55	46839	No	NA	86	17	0	Complete	High-quality	100	DTR
H19_idba_62	44760	No	NA	75	14	0	Complete	High-quality	100	DTR
H19_idba_67	44205	No	NA	55	7	1	Complete	High-quality	100	DTR
H19_idba_72	43392	No	NA	65	16	1	High-quality	High-quality	96.55	AAI-based
H19_idba_93	40090	No	NA	57	19	1	Complete	High-quality	100	DTR
H19_idba_96	39940	No	NA	57	21	3	Complete	High-quality	100	DTR
H19_idba_102	37794	No	NA	59	21	1	Complete	High-quality	100	DTR
H19_idba_103	37747	No	NA	45	20	0	Complete	High-quality	100	DTR
H22_idba_3	186644	No	NA	158	5	91	High-quality	High-quality	100	HMM-based
H22_idba_16	60690	No	NA	80	16	3	Complete	High-quality	100	DTR
H22_idba_17	56873	No	NA	80	14	3	Complete	High-quality	100	DTR
H22_idba_23	52766	No	NA	91	16	1	Complete	High-quality	100	DTR
H22_idba_24	52616	No	NA	80	13	3	Complete	High-quality	100	DTR
H22_idba_33	43613	No	NA	55	8	1	High-quality	High-quality	96.51	AAI-based
H22_idba_35	42510	No	NA	57	24	1	Complete	High-quality	100	DTR
H22_idba_37	42184	No	NA	65	18	1	Complete	High-quality	100	DTR
H22_idba_39	41517	No	NA	56	8	0	Complete	High-quality	100	DTR
H22_idba_40	41367	No	NA	62	22	1	Complete	High-quality	100	DTR
H22_idba_41	41350	No	NA	72	15	0	Complete	High-quality	100	DTR
H22_idba_43	39629	No	NA	37	8	1	High-quality	High-quality	92.52	AAI-based
H22_idba_47	38789	No	NA	68	13	0	Complete	High-quality	100	DTR
H22_idba_57	34376	No	NA	49	12	0	Complete	High-quality	100	DTR
H22_idba_61	32117	No	NA	46	22	2	Complete	High-quality	100	DTR
H23_idba_8	98987	No	NA	116	18	3	Complete	High-quality	100	DTR
H23_idba_9	97855	No	NA	100	15	1	High-quality	High-quality	97.79	AAI-based
H23_idba_13	86596	No	NA	128	18	4	Complete	High-quality	100	DTR
H23_idba_19	69066	No	NA	99	18	2	Complete	High-quality	100	DTR
H23_idba_22	68801	No	NA	75	14	2	Complete	High-quality	100	DTR
H23_idba_43	50673	No	NA	86	16	0	High-quality	High-quality	95.58	AAI-based
H23_idba_46	48025	No	NA	74	20	0	High-quality	High-quality	95.77	AAI-based
H23_idba_51	44844	No	NA	69	18	0	Complete	High-quality	100	DTR
H23_idba_52	44586	No	NA	80	11	0	Complete	High-quality	100	DTR
H23_idba_68	40365	No	NA	65	16	0	High-quality	High-quality	98.55	AAI-based
H23_idba_74	37330	Yes	33471	64	19	2	Complete	High-quality	100	DTR
H23_idba_84	35051	No	NA	50	13	0	High-quality	High-quality	97.85	AAI-based
H23_idba_581	6883	No	NA	5	2	0	High-quality	High-quality	100	AAI-based
H24_idba_1	154994	No	NA	205	17	3	Complete	High-quality	100	DTR
H24_idba_23	54203	No	NA	94	17	1	Complete	High-quality	100	DTR
H24_idba_27	46204	No	NA	75	19	0	Complete	High-quality	100	DTR
H24_idba_29	45563	No	NA	69	30	0	Complete	High-quality	100	DTR
H24_idba_40	38385	No	NA	52	26	0	Complete	High-quality	100	DTR
H24_idba_41	38352	No	NA	60	24	0	Complete	High-quality	100	DTR
H27_idba_8	177231	No	NA	277	196	0	Complete	High-quality	100	DTR
H27_idba_51	62831	No	NA	101	31	1	Complete	High-quality	100	DTR
H27_idba_58	60876	No	NA	93	36	0	High-quality	High-quality	99.61	AAI-based
H27_idba_60	60567	No	NA	93	34	0	High-quality	High-quality	100	AAI-based
H27_idba_67	58140	No	NA	90	20	0	High-quality	High-quality	98.56	AAI-based
H27_idba_74	55978	Yes	34778	57	5	14	High-quality	High-quality	90.32	AAI-based
H27_idba_103	48320	No	NA	73	35	1	Complete	High-quality	100	DTR
H27_idba_122	45128	No	NA	71	24	0	High-quality	High-quality	99.03	AAI-based
H27_idba_133	43763	No	NA	42	6	3	High-quality	High-quality	100	AAI-based
H27_idba_135	43723	No	NA	63	23	0	Complete	High-quality	100	DTR
H27_idba_143	43072	No	NA	58	27	1	Complete	High-quality	100	DTR
H27_idba_150	42699	No	NA	80	15	0	Complete	High-quality	100	DTR
H27_idba_154	42247	No	NA	57	7	1	Complete	High-quality	100	DTR
H27_idba_158	41797	No	NA	53	28	1	Complete	High-quality	100	DTR
H27_idba_162	41523	No	NA	45	4	1	High-quality	High-quality	91.78	AAI-based
H27_idba_164	41091	No	NA	63	24	2	Complete	High-quality	100	DTR
H27_idba_169	40652	No	NA	76	21	0	Complete	High-quality	100	DTR
H27_idba_178	40139	No	NA	69	15	0	Complete	High-quality	100	DTR
H27_idba_184	39726	No	NA	64	9	0	Complete	High-quality	100	DTR
H27_idba_188	39528	No	NA	58	19	1	Complete	High-quality	100	DTR
H27_idba_197	38950	No	NA	55	23	0	High-quality	High-quality	98.83	AAI-based
H27_idba_224	36284	No	NA	53	15	0	Complete	High-quality	100	DTR
H27_idba_230	35883	No	NA	50	15	1	Complete	High-quality	100	DTR
H27_idba_269	33628	No	NA	63	15	1	Complete	High-quality	100	DTR
H27_idba_278	32803	No	NA	48	13	2	Complete	High-quality	100	DTR
H27_idba_294	31845	No	NA	50	15	0	Complete	High-quality	100	DTR
H27_idba_674	18114	No	NA	29	7	0	Complete	High-quality	100	DTR
H27_idba_828	15251	No	NA	26	4	0	Complete	High-quality	100	DTR
H27_idba_976	13164	No	NA	16	5	0	Complete	High-quality	100	ITR
H27_idba_983	13060	No	NA	26	3	0	Complete	High-quality	100	DTR
H28_idba_1	319130	No	NA	271	1	175	High-quality	High-quality	100	HMM-based
H28_idba_150	52860	No	NA	82	28	0	Complete	High-quality	100	DTR
H28_idba_184	47314	No	NA	81	26	1	Complete	High-quality	100	DTR
H28_idba_198	45552	No	NA	60	29	0	Complete	High-quality	100	DTR
H28_idba_212	43438	No	NA	70	17	1	Complete	High-quality	100	DTR
H28_idba_215	43257	No	NA	43	7	2	High-quality	High-quality	100	AAI-based
H28_idba_218	43098	No	NA	67	15	2	High-quality	High-quality	90.25	AAI-based
H28_idba_219	42805	No	NA	71	17	1	Complete	High-quality	100	DTR
H28_idba_224	42589	No	NA	76	15	0	High-quality	High-quality	95.45	AAI-based
H28_idba_226	42491	No	NA	73	17	0	Complete	High-quality	100	DTR
H28_idba_243	41874	No	NA	55	7	0	Complete	High-quality	100	DTR
H28_idba_244	41727	No	NA	73	22	0	Complete	High-quality	100	DTR
H28_idba_252	41382	No	NA	63	26	1	Complete	High-quality	100	DTR
H28_idba_254	41280	No	NA	62	24	2	Complete	High-quality	100	DTR
H28_idba_274	39729	No	NA	70	21	0	Complete	High-quality	100	DTR
H28_idba_276	39540	No	NA	64	19	0	Complete	High-quality	100	DTR
H28_idba_281	39217	No	NA	62	23	2	Complete	High-quality	100	DTR
H28_idba_306	36750	No	NA	68	21	3	Complete	High-quality	100	DTR
H28_idba_307	36637	No	NA	45	7	0	High-quality	High-quality	92.96	AAI-based
H28_idba_329	35726	No	NA	50	20	0	Complete	High-quality	100	DTR
H28_idba_341	34900	No	NA	51	14	2	Complete	High-quality	100	DTR
H28_idba_369	33459	No	NA	44	9	1	Complete	High-quality	100	DTR
H28_idba_415	30818	No	NA	45	9	1	High-quality	High-quality	91.31	AAI-based
H28_idba_2031	7078	No	NA	9	3	0	Complete	High-quality	100	DTR
H31_idba_1	157561	No	NA	213	46	5	Complete	High-quality	100	DTR
H31_idba_3	130141	No	NA	178	34	3	High-quality	High-quality	97.75	AAI-based
H31_idba_12	88165	No	NA	114	16	2	Complete	High-quality	100	DTR
H31_idba_23	66920	No	NA	91	39	2	High-quality	High-quality	100	AAI-based
H31_idba_28	62720	No	NA	90	13	4	Complete	High-quality	100	DTR
H31_idba_29	62686	No	NA	80	31	2	Complete	High-quality	100	DTR
H31_idba_36	57748	No	NA	100	18	1	Complete	High-quality	100	DTR
H31_idba_43	50946	No	NA	85	32	2	Complete	High-quality	100	DTR
H31_idba_48	48967	No	NA	63	32	0	Complete	High-quality	100	DTR
H31_idba_56	46414	No	NA	71	23	1	High-quality	High-quality	98.61	AAI-based
H31_idba_61	45724	No	NA	72	43	0	Complete	High-quality	100	DTR
H31_idba_65	43954	No	NA	61	17	0	Complete	High-quality	100	DTR
H31_idba_86	40158	No	NA	43	22	0	Complete	High-quality	100	DTR
H31_idba_90	39610	No	NA	46	8	0	Complete	High-quality	100	DTR
H31_idba_96	38548	No	NA	58	14	1	Complete	High-quality	100	DTR
H31_idba_115	35881	No	NA	45	9	0	Complete	High-quality	100	DTR
H31_idba_140	32614	No	NA	69	16	2	Complete	High-quality	100	DTR
H31_idba_747	8169	No	NA	13	1	0	Complete	High-quality	100	DTR
H31_idba_911	6664	No	NA	8	3	0	High-quality	High-quality	97.65	AAI-based
H32_idba_12	158913	No	NA	214	17	4	Complete	High-quality	100	DTR
H32_idba_32	101862	No	NA	93	1	58	High-quality	High-quality	100	HMM-based
H32_idba_43	95888	No	NA	131	31	1	High-quality	High-quality	100	AAI-based
H32_idba_91	64725	No	NA	97	14	1	Complete	High-quality	100	DTR
H32_idba_112	57107	No	NA	106	20	1	Complete	High-quality	100	DTR
H32_idba_114	55786	No	NA	72	30	0	Complete	High-quality	100	DTR
H32_idba_150	46194	No	NA	70	22	1	Complete	High-quality	100	DTR
H32_idba_156	44572	No	NA	82	16	0	Complete	High-quality	100	DTR
H32_idba_169	41913	No	NA	51	22	0	Complete	High-quality	100	DTR
H32_idba_177	41065	No	NA	68	14	3	Complete	High-quality	100	DTR
H32_idba_184	40118	No	NA	61	27	2	High-quality	High-quality	100	AAI-based
H32_idba_189	39366	No	NA	54	18	0	Complete	High-quality	100	DTR
H32_idba_191	38741	No	NA	62	25	1	High-quality	High-quality	97.15	AAI-based
H32_idba_199	37420	No	NA	57	15	1	High-quality	High-quality	100	AAI-based
H34_idba_5	213035	No	NA	300	37	9	Complete	High-quality	100	DTR
H34_idba_23	151827	No	NA	118	1	83	High-quality	High-quality	100	HMM-based
H34_idba_34	131351	No	NA	120	3	76	High-quality	High-quality	100	HMM-based
H34_idba_62	98286	No	NA	104	13	1	Complete	High-quality	100	DTR
H34_idba_66	95320	No	NA	92	11	5	Complete	High-quality	100	DTR
H34_idba_69	94140	No	NA	99	17	0	Complete	High-quality	100	DTR
H34_idba_78	86316	No	NA	111	14	2	Complete	High-quality	100	DTR
H34_idba_80	85644	No	NA	112	15	3	Complete	High-quality	100	ITR
H34_idba_115	72047	No	NA	84	13	1	Complete	High-quality	100	DTR
H34_idba_122	68462	No	NA	96	16	2	High-quality	High-quality	96.49	AAI-based
H34_idba_144	62521	No	NA	102	22	1	Complete	High-quality	100	DTR
H34_idba_145	62349	No	NA	71	8	0	Complete	High-quality	100	DTR
H34_idba_177	54144	No	NA	84	23	1	Complete	High-quality	100	DTR
H34_idba_193	50876	No	NA	87	19	1	Complete	High-quality	100	DTR
H34_idba_197	50640	No	NA	82	66	0	Complete	High-quality	100	DTR
H34_idba_199	49357	No	NA	85	17	0	Complete	High-quality	100	DTR
H34_idba_218	46150	No	NA	72	13	1	High-quality	High-quality	100	AAI-based
H34_idba_233	44604	No	NA	76	24	0	Complete	High-quality	100	DTR
H34_idba_236	43881	No	NA	70	16	0	Complete	High-quality	100	DTR
H34_idba_242	42964	No	NA	71	14	0	High-quality	High-quality	100	AAI-based
H34_idba_244	42514	No	NA	64	9	0	High-quality	High-quality	100	AAI-based
H34_idba_247	42380	No	NA	59	23	1	Complete	High-quality	100	DTR
H34_idba_249	41981	No	NA	45	20	0	Complete	High-quality	100	DTR
H34_idba_250	41918	No	NA	54	18	1	High-quality	High-quality	100	AAI-based
H34_idba_257	41234	No	NA	60	13	0	Complete	High-quality	100	DTR
H34_idba_262	41087	No	NA	58	28	0	Complete	High-quality	100	DTR
H34_idba_265	41010	No	NA	69	21	1	High-quality	High-quality	100	AAI-based
H34_idba_275	40406	No	NA	44	13	1	Complete	High-quality	100	DTR
H34_idba_276	40347	No	NA	58	28	2	Complete	High-quality	100	DTR
H34_idba_287	39560	No	NA	49	10	1	Complete	High-quality	100	DTR
H34_idba_298	39108	No	NA	64	21	1	Complete	High-quality	100	DTR
H34_idba_301	39005	No	NA	51	22	0	Complete	High-quality	100	DTR
H34_idba_313	38344	No	NA	56	16	0	High-quality	High-quality	91.15	AAI-based
H34_idba_317	37974	No	NA	59	15	2	Complete	High-quality	100	DTR
H34_idba_319	37834	No	NA	65	20	1	High-quality	High-quality	94.43	AAI-based
H34_idba_320	37768	No	NA	51	16	1	Complete	High-quality	100	DTR
H34_idba_338	36576	No	NA	56	26	2	Complete	High-quality	100	DTR
H34_idba_343	36038	No	NA	67	18	0	High-quality	High-quality	100	AAI-based
H34_idba_376	33569	No	NA	46	12	0	Complete	High-quality	100	DTR
H34_idba_392	32733	No	NA	55	19	2	Complete	High-quality	100	DTR
H34_idba_397	32540	No	NA	50	18	1	High-quality	High-quality	100	AAI-based
H34_idba_1209	12643	No	NA	24	5	0	Complete	High-quality	100	DTR
H46_idba_89	84764	No	NA	112	13	2	Complete	High-quality	100	DTR
H46_idba_135	62547	No	NA	104	15	3	Complete	High-quality	100	DTR
H46_idba_159	56795	No	NA	97	14	1	Complete	High-quality	100	ITR
H46_idba_205	45793	No	NA	88	32	1	Complete	High-quality	100	DTR
H46_idba_208	45444	No	NA	75	26	0	Complete	High-quality	100	DTR
H46_idba_209	45209	No	NA	75	21	2	Complete	High-quality	100	DTR
H46_idba_250	39876	No	NA	66	15	5	High-quality	High-quality	100	AAI-based
H46_idba_252	39560	No	NA	49	10	1	Complete	High-quality	100	DTR
H46_idba_254	39440	No	NA	65	23	0	Complete	High-quality	100	DTR
H46_idba_255	39348	No	NA	61	26	3	Complete	High-quality	100	DTR
H46_idba_282	35876	No	NA	54	15	0	Complete	High-quality	100	DTR
H46_idba_296	34861	No	NA	57	24	1	Complete	High-quality	100	DTR
H46_idba_312	33554	No	NA	47	10	1	High-quality	High-quality	90.57	AAI-based
H46_idba_326	32516	No	NA	60	22	0	Complete	High-quality	100	DTR
H46_idba_348	30273	No	NA	50	15	0	Complete	High-quality	100	DTR
H46_idba_360	29768	No	NA	46	13	0	Complete	High-quality	100	DTR
H47_idba_18	79376	No	NA	120	41	3	High-quality	High-quality	100	AAI-based
H47_idba_19	77197	No	NA	111	29	2	Complete	High-quality	100	DTR
H47_idba_30	64386	No	NA	116	23	1	High-quality	High-quality	100	AAI-based
H47_idba_35	61672	No	NA	93	18	0	High-quality	High-quality	100	AAI-based
H47_idba_41	54723	No	NA	94	15	1	Complete	High-quality	100	DTR
H47_idba_45	53803	No	NA	80	21	1	Complete	High-quality	100	DTR
H47_idba_62	46996	No	NA	75	27	0	Complete	High-quality	100	ITR
H47_idba_69	45419	No	NA	56	10	2	High-quality	High-quality	100	AAI-based
H47_idba_72	44765	No	NA	71	28	1	Complete	High-quality	100	DTR
H47_idba_73	44749	No	NA	64	14	1	Complete	High-quality	100	DTR
H47_idba_80	42499	No	NA	80	16	1	Complete	High-quality	100	DTR
H47_idba_81	42473	No	NA	57	28	0	Complete	High-quality	100	DTR
H47_idba_85	41261	No	NA	46	9	1	Complete	High-quality	100	DTR
H47_idba_89	40345	No	NA	40	9	2	Complete	High-quality	100	DTR
H47_idba_98	39037	No	NA	63	22	0	Complete	High-quality	100	DTR
H47_idba_107	38059	No	NA	54	9	0	High-quality	High-quality	90.11	AAI-based
H47_idba_113	37515	No	NA	64	16	0	Complete	High-quality	100	DTR
H47_idba_124	36558	No	NA	47	5	1	Complete	High-quality	100	DTR
H47_idba_133	36087	No	NA	50	23	2	Complete	High-quality	100	DTR
H47_idba_139	35766	No	NA	45	7	2	Complete	High-quality	100	DTR
H47_idba_143	35324	No	NA	57	13	1	High-quality	High-quality	92.92	AAI-based
H47_idba_147	35033	No	NA	60	22	2	Complete	High-quality	100	DTR
H47_idba_154	34564	No	NA	59	15	0	Complete	High-quality	100	DTR
H47_idba_160	33633	No	NA	58	17	0	Complete	High-quality	100	DTR
H47_idba_163	33590	No	NA	48	17	1	Complete	High-quality	100	DTR
H47_idba_176	32613	No	NA	57	16	1	Complete	High-quality	100	DTR
H47_idba_178	32381	No	NA	42	4	1	Complete	High-quality	100	DTR
H47_idba_181	31731	No	NA	45	19	0	Complete	High-quality	100	DTR
H48_idba_44	67092	No	NA	71	11	1	Complete	High-quality	100	DTR
H48_idba_51	61454	No	NA	100	22	0	Complete	High-quality	100	DTR
H48_idba_57	59858	No	NA	92	21	0	Complete	High-quality	100	DTR
H48_idba_60	59537	No	NA	91	29	0	Complete	High-quality	100	DTR
H48_idba_90	49815	No	NA	45	3	29	High-quality	High-quality	100	AAI-based
H48_idba_98	48750	No	NA	74	21	1	High-quality	High-quality	100	AAI-based
H48_idba_118	44927	No	NA	71	27	0	Complete	High-quality	100	DTR
H48_idba_120	44789	No	NA	74	24	0	Complete	High-quality	100	DTR
H48_idba_121	44773	No	NA	74	17	0	Complete	High-quality	100	DTR
H48_idba_128	43877	No	NA	67	23	1	High-quality	High-quality	96.26	AAI-based
H48_idba_135	43426	No	NA	57	11	0	High-quality	High-quality	100	AAI-based
H48_idba_139	43125	No	NA	59	8	1	Complete	High-quality	100	DTR
H48_idba_143	42748	No	NA	56	24	2	Complete	High-quality	100	DTR
H48_idba_144	42722	No	NA	71	20	0	Complete	High-quality	100	DTR
H48_idba_153	42002	No	NA	73	13	0	High-quality	High-quality	99.73	AAI-based
H48_idba_155	41339	No	NA	73	19	2	High-quality	High-quality	98.06	AAI-based
H48_idba_162	40717	No	NA	59	19	1	High-quality	High-quality	100	AAI-based
H48_idba_164	40648	No	NA	45	9	1	Complete	High-quality	100	DTR
H48_idba_167	40213	No	NA	66	24	1	Complete	High-quality	100	DTR
H48_idba_169	40080	No	NA	55	22	1	Complete	High-quality	100	DTR
H48_idba_170	40073	No	NA	70	23	0	Complete	High-quality	100	DTR
H48_idba_173	39377	No	NA	68	14	0	Complete	High-quality	100	DTR
H48_idba_176	39093	No	NA	50	19	0	Complete	High-quality	100	DTR
H48_idba_179	38854	No	NA	56	9	1	Complete	High-quality	100	DTR
H48_idba_180	38846	No	NA	55	8	0	Complete	High-quality	100	DTR
H48_idba_209	36940	No	NA	51	20	1	Complete	High-quality	100	ITR
H48_idba_210	36627	No	NA	64	22	1	Complete	High-quality	100	DTR
H48_idba_211	36576	No	NA	49	17	1	Complete	High-quality	100	DTR
H48_idba_227	35638	No	NA	47	9	0	Complete	High-quality	100	DTR
H48_idba_279	31270	No	NA	52	18	1	High-quality	High-quality	91.75	AAI-based
H48_idba_846	14106	No	NA	18	6	0	Complete	High-quality	100	ITR
H48_idba_2368	5594	No	NA	9	5	0	High-quality	High-quality	100	AAI-based
H49_idba_26	97664	No	NA	83	8	0	Complete	High-quality	100	DTR
H49_idba_31	91452	No	NA	86	10	0	Complete	High-quality	100	DTR
H49_idba_39	80005	Yes	73848	137	17	5	Complete	High-quality	100	DTR
H49_idba_52	64072	No	NA	63	21	9	High-quality	High-quality	100	AAI-based
H49_idba_57	61818	No	NA	82	18	0	Complete	High-quality	100	DTR
H49_idba_65	58078	No	NA	86	12	4	Complete	High-quality	100	DTR
H49_idba_69	56291	No	NA	102	14	3	High-quality	High-quality	97.6	AAI-based
H49_idba_70	55206	No	NA	103	20	1	Complete	High-quality	100	DTR
H49_idba_92	47338	No	NA	76	17	0	Complete	High-quality	100	DTR
H49_idba_93	47233	No	NA	78	27	0	Complete	High-quality	100	DTR
H49_idba_112	41269	No	NA	70	25	1	High-quality	High-quality	95.22	AAI-based
H49_idba_124	39839	No	NA	63	20	1	Complete	High-quality	100	DTR
H49_idba_137	37999	No	NA	60	20	2	Complete	High-quality	100	DTR
H49_idba_138	37760	No	NA	50	8	1	Complete	High-quality	100	DTR
H49_idba_145	36447	No	NA	55	20	1	Complete	High-quality	100	DTR
H49_idba_159	35303	No	NA	57	21	0	High-quality	High-quality	100	AAI-based
H49_idba_165	33672	No	NA	61	21	0	High-quality	High-quality	100	AAI-based
H49_idba_172	32731	No	NA	54	15	0	High-quality	High-quality	96.51	AAI-based
H49_idba_184	31475	Yes	27744	50	18	3	Complete	High-quality	100	DTR
H50_idba_23	146993	No	NA	213	40	4	Complete	High-quality	100	DTR
H50_idba_120	69622	No	NA	106	16	2	Complete	High-quality	100	DTR
H50_idba_124	67481	Yes	48864	87	22	9	High-quality	High-quality	100	AAI-based
H50_idba_135	64530	No	NA	99	29	0	Complete	High-quality	100	DTR
H50_idba_187	55530	No	NA	83	14	2	Complete	High-quality	100	DTR
H50_idba_198	53976	No	NA	96	21	1	High-quality	High-quality	100	AAI-based
H50_idba_203	53235	No	NA	96	20	0	High-quality	High-quality	100	AAI-based
H50_idba_244	47728	No	NA	71	29	1	Complete	High-quality	100	ITR
H50_idba_250	47103	No	NA	71	29	2	Complete	High-quality	100	DTR
H50_idba_251	47031	No	NA	63	17	1	Complete	High-quality	100	DTR
H50_idba_274	44360	No	NA	60	42	0	Complete	High-quality	100	DTR
H50_idba_280	43853	No	NA	72	16	0	Complete	High-quality	100	DTR
H50_idba_296	42556	No	NA	70	19	1	Complete	High-quality	100	DTR
H50_idba_311	40946	Yes	39180	71	23	2	Complete	High-quality	100	DTR
H50_idba_317	40456	No	NA	48	9	0	Complete	High-quality	100	DTR
H50_idba_320	40256	No	NA	51	9	0	Complete	High-quality	100	DTR
H50_idba_324	40158	No	NA	63	18	0	Complete	High-quality	100	DTR
H50_idba_347	37993	No	NA	57	28	0	Complete	High-quality	100	DTR
H50_idba_377	35055	No	NA	47	19	0	Complete	High-quality	100	DTR
H50_idba_391	34292	No	NA	51	11	5	High-quality	High-quality	92.33	AAI-based
H50_idba_475	29157	No	NA	45	15	0	Complete	High-quality	100	DTR
H54_idba_14	154522	No	NA	224	33	4	Complete	High-quality	100	ITR
H54_idba_38	100835	No	NA	107	16	1	Complete	High-quality	100	DTR
H54_idba_73	70944	Yes	47021	74	23	16	High-quality	High-quality	99.19	AAI-based
H54_idba_75	70805	No	NA	103	14	3	High-quality	High-quality	100	AAI-based
H54_idba_99	58487	No	NA	81	16	0	Complete	High-quality	100	DTR
H54_idba_111	55677	No	NA	78	19	0	Complete	High-quality	100	DTR
H54_idba_118	54526	No	NA	79	23	0	High-quality	High-quality	99.79	AAI-based
H54_idba_124	51587	No	NA	88	23	1	Complete	High-quality	100	DTR
H54_idba_158	45546	No	NA	76	26	0	Complete	High-quality	100	DTR
H54_idba_159	45484	No	NA	83	16	0	Complete	High-quality	100	DTR
H54_idba_172	43560	No	NA	64	15	1	Complete	High-quality	100	DTR
H54_idba_237	35560	No	NA	55	20	0	High-quality	High-quality	92	AAI-based
H54_idba_274	32254	No	NA	27	5	0	Complete	High-quality	100	DTR
H54_idba_697	12824	No	NA	17	5	0	Complete	High-quality	100	ITR
H60_idba_2	184706	No	NA	231	26	4	High-quality	High-quality	100	AAI-based
H60_idba_88	43462	No	NA	57	29	0	High-quality	High-quality	100	AAI-based
H60_idba_96	40157	No	NA	63	16	0	High-quality	High-quality	93.19	AAI-based
H60_idba_118	35761	No	NA	60	29	0	Complete	High-quality	100	DTR
H63_idba_42	62848	No	NA	67	8	0	Complete	High-quality	100	DTR
H63_idba_55	57028	No	NA	101	23	3	Complete	High-quality	100	DTR
H63_idba_89	43976	No	NA	70	11	1	Complete	High-quality	100	DTR
H63_idba_106	39588	No	NA	64	18	0	High-quality	High-quality	96.78	AAI-based
H63_idba_114	38736	No	NA	63	22	0	High-quality	High-quality	100	AAI-based
H63_idba_123	36655	No	NA	63	18	0	Complete	High-quality	100	DTR
H63_idba_144	34030	No	NA	43	23	2	Complete	High-quality	100	DTR
H63_idba_483	13369	No	NA	18	4	0	High-quality	High-quality	97.88	AAI-based
H65_idba_35	96701	No	NA	89	8	0	Complete	High-quality	100	DTR
H65_idba_90	58731	No	NA	105	18	0	Complete	High-quality	100	DTR
H65_idba_93	57311	No	NA	108	21	1	Complete	High-quality	100	DTR
H65_idba_122	47881	No	NA	72	15	0	Complete	High-quality	100	DTR
H65_idba_174	39093	No	NA	43	4	1	Complete	High-quality	100	DTR
H65_idba_179	38637	No	NA	59	21	0	Complete	High-quality	100	DTR
H65_idba_186	37613	No	NA	58	17	2	High-quality	High-quality	98.43	AAI-based
H65_idba_188	37320	No	NA	66	26	0	High-quality	High-quality	91.99	AAI-based
H65_idba_189	37065	No	NA	58	27	0	High-quality	High-quality	100	AAI-based
H65_idba_193	36742	No	NA	56	26	0	Complete	High-quality	100	DTR
H65_idba_198	36489	No	NA	57	16	0	High-quality	High-quality	96.43	AAI-based
H65_idba_502	16952	No	NA	25	6	0	Complete	High-quality	100	DTR
H65_idba_1292	5652	No	NA	6	2	0	High-quality	High-quality	92.56	AAI-based
H69_idba_14	151675	No	NA	190	16	3	Complete	High-quality	100	ITR
H69_idba_19	146008	No	NA	204	41	3	Complete	High-quality	100	DTR
H69_idba_60	78816	No	NA	95	13	0	Complete	High-quality	100	DTR
H69_idba_108	57277	No	NA	52	1	34	High-quality	High-quality	95.67	AAI-based
H69_idba_109	57108	No	NA	91	19	3	Complete	High-quality	100	DTR
H69_idba_121	53040	No	NA	82	28	0	Complete	High-quality	100	DTR
H69_idba_140	48148	No	NA	62	11	2	High-quality	High-quality	94.86	AAI-based
H69_idba_144	47083	No	NA	70	19	0	High-quality	High-quality	99.06	AAI-based
H69_idba_146	46615	No	NA	71	21	1	Complete	High-quality	100	DTR
H69_idba_147	46466	No	NA	74	11	0	Complete	High-quality	100	DTR
H69_idba_164	43719	No	NA	54	7	1	High-quality	High-quality	98.69	AAI-based
H69_idba_170	42554	No	NA	75	12	0	Complete	High-quality	100	DTR
H69_idba_223	34835	No	NA	64	16	0	Complete	High-quality	100	DTR
H69_idba_231	34325	No	NA	49	12	0	Complete	High-quality	100	DTR
H69_idba_255	32314	No	NA	51	18	2	Complete	High-quality	100	DTR
H73_idba_3	156569	No	NA	200	42	3	Complete	High-quality	100	DTR
H73_idba_98	49140	No	NA	83	16	0	High-quality	High-quality	96.33	AAI-based
H73_idba_112	45968	No	NA	71	27	2	High-quality	High-quality	98.03	AAI-based
H73_idba_147	42105	No	NA	60	28	5	High-quality	High-quality	90.85	AAI-based
H73_idba_150	41892	No	NA	62	44	0	High-quality	High-quality	100	AAI-based
H73_idba_181	38471	No	NA	62	21	0	Complete	High-quality	100	ITR
NC150_idba_20	100592	No	NA	108	17	0	Complete	High-quality	100	DTR
NC150_idba_83	46271	No	NA	72	21	0	High-quality	High-quality	98.01	AAI-based
NC150_idba_107	42766	No	NA	72	24	3	Complete	High-quality	100	DTR
NC150_idba_109	42713	No	NA	65	17	1	High-quality	High-quality	95.17	AAI-based
NC150_idba_133	39248	No	NA	51	17	0	Complete	High-quality	100	DTR
NC150_idba_149	37503	No	NA	55	18	0	High-quality	High-quality	98.57	AAI-based
NC150_idba_162	36605	No	NA	48	21	0	Complete	High-quality	100	DTR
NC151_idba_50	62902	No	NA	84	32	1	Complete	High-quality	100	DTR
NC151_idba_87	46672	No	NA	61	27	0	Complete	High-quality	100	DTR
NC151_idba_91	45761	No	NA	65	32	0	Complete	High-quality	100	DTR
NC151_idba_97	44697	No	NA	69	19	0	Complete	High-quality	100	DTR
NC151_idba_99	44548	No	NA	77	30	0	Complete	High-quality	100	DTR
NC151_idba_102	44198	No	NA	64	27	1	High-quality	High-quality	100	AAI-based
NC151_idba_107	43787	No	NA	75	21	1	Complete	High-quality	100	DTR
NC151_idba_117	42829	No	NA	66	17	1	Complete	High-quality	100	DTR
NC151_idba_119	42717	No	NA	85	19	0	Complete	High-quality	100	ITR
NC151_idba_130	41220	No	NA	64	16	2	Complete	High-quality	100	DTR
NC151_idba_156	38668	No	NA	68	29	2	High-quality	High-quality	100	AAI-based
NC151_idba_170	37254	No	NA	62	10	0	Complete	High-quality	100	DTR
NC151_idba_172	37181	No	NA	61	16	1	Complete	High-quality	100	DTR
NC151_idba_174	37159	No	NA	50	20	1	Complete	High-quality	100	DTR
NC151_idba_177	37003	No	NA	53	19	1	Complete	High-quality	100	DTR
NC151_idba_179	36804	No	NA	49	8	2	High-quality	High-quality	93.09	AAI-based
NC151_idba_181	36626	No	NA	49	22	0	Complete	High-quality	100	DTR
NC151_idba_190	35884	No	NA	50	23	1	Complete	High-quality	100	DTR
NC151_idba_197	34385	No	NA	57	19	1	High-quality	High-quality	100	AAI-based
NC151_idba_209	32769	No	NA	53	11	1	High-quality	High-quality	98.79	AAI-based
NC152_idba_3	117655	No	NA	139	31	6	Complete	High-quality	100	DTR
NC152_idba_12	92911	No	NA	135	24	1	High-quality	High-quality	96.8	AAI-based
NC152_idba_17	70227	No	NA	101	16	3	Complete	High-quality	100	DTR
NC152_idba_21	62465	No	NA	68	4	0	Complete	High-quality	100	DTR
NC152_idba_33	54720	No	NA	76	23	1	High-quality	High-quality	100	AAI-based
NC152_idba_40	48237	No	NA	88	24	0	Complete	High-quality	100	DTR
NC152_idba_50	44710	No	NA	79	20	2	Complete	High-quality	100	DTR
NC152_idba_53	43131	No	NA	56	9	0	Complete	High-quality	100	DTR
NC152_idba_54	43093	No	NA	66	28	1	Complete	High-quality	100	DTR
NC152_idba_58	42356	No	NA	75	13	0	Complete	High-quality	100	DTR
NC152_idba_59	41873	No	NA	75	19	1	High-quality	High-quality	100	AAI-based
NC152_idba_60	41473	No	NA	72	16	0	Complete	High-quality	100	DTR
NC152_idba_71	39506	No	NA	77	17	0	Complete	High-quality	100	DTR
NC152_idba_73	39356	No	NA	59	25	0	Complete	High-quality	100	DTR
NC152_idba_138	24114	No	NA	36	14	0	Complete	High-quality	100	DTR
NC159_idba_11	59279	No	NA	88	19	0	High-quality	High-quality	97.87	AAI-based
NC159_idba_13	57495	Yes	51233	68	6	4	High-quality	High-quality	100	AAI-based
NC159_idba_14	57476	No	NA	96	22	2	Complete	High-quality	100	DTR
NC159_idba_22	47447	No	NA	70	35	1	Complete	High-quality	100	DTR
NC159_idba_24	45978	No	NA	63	27	1	Complete	High-quality	100	DTR
NC159_idba_26	44468	No	NA	54	46	0	Complete	High-quality	100	DTR
NC159_idba_52	32547	No	NA	49	17	1	Complete	High-quality	100	DTR
NC173_idba_121	56617	No	NA	72	14	4	Complete	High-quality	100	ITR
NC173_idba_131	54935	No	NA	84	21	1	Complete	High-quality	100	DTR
NC173_idba_146	51842	Yes	43413	60	4	4	Complete	High-quality	100	Provirus
NC173_idba_153	50086	No	NA	76	70	0	Complete	High-quality	100	DTR
NC173_idba_156	49314	No	NA	68	12	1	Complete	High-quality	100	DTR
NC173_idba_197	44334	No	NA	76	26	1	Complete	High-quality	100	DTR
NC173_idba_232	41017	No	NA	61	15	5	Complete	High-quality	100	DTR
NC173_idba_256	39153	No	NA	57	21	1	High-quality	High-quality	98.48	AAI-based
NC173_idba_297	35489	No	NA	49	15	0	Complete	High-quality	100	DTR
NC173_idba_315	34074	No	NA	48	12	0	Complete	High-quality	100	DTR
NC183_idba_14	136485	No	NA	203	27	2	Complete	High-quality	100	DTR
NC183_idba_31	106038	No	NA	121	19	2	Complete	High-quality	100	DTR
NC183_idba_38	101735	No	NA	129	17	5	Complete	High-quality	100	DTR
NC183_idba_102	61508	No	NA	82	14	0	Complete	High-quality	100	DTR
NC183_idba_109	59303	No	NA	82	16	0	Complete	High-quality	100	DTR
NC183_idba_113	57256	No	NA	81	13	5	Complete	High-quality	100	DTR
NC183_idba_129	54174	No	NA	76	14	2	Complete	High-quality	100	DTR
NC183_idba_133	53195	No	NA	82	29	0	Complete	High-quality	100	DTR
NC183_idba_152	49913	No	NA	67	11	1	Complete	High-quality	100	DTR
NC183_idba_165	47406	No	NA	60	26	0	High-quality	High-quality	100	AAI-based
NC183_idba_169	47103	No	NA	84	55	0	Complete	High-quality	100	DTR
NC183_idba_175	46100	No	NA	53	6	2	Complete	High-quality	100	DTR
NC183_idba_181	45044	No	NA	79	26	1	Complete	High-quality	100	DTR
NC183_idba_194	42921	No	NA	59	27	0	High-quality	High-quality	93.68	AAI-based
NC183_idba_197	42772	No	NA	54	19	0	High-quality	High-quality	100	AAI-based
NC183_idba_205	41532	No	NA	74	23	0	Complete	High-quality	100	DTR
NC183_idba_214	40626	No	NA	59	17	0	Complete	High-quality	100	DTR
NC183_idba_222	39719	No	NA	64	25	2	Complete	High-quality	100	DTR
NC183_idba_230	38808	No	NA	38	8	0	Complete	High-quality	100	DTR
NC183_idba_233	37941	No	NA	57	22	0	High-quality	High-quality	95.5	AAI-based
NC183_idba_238	37201	No	NA	66	18	0	Complete	High-quality	100	DTR
NC183_idba_251	36122	No	NA	59	27	1	Complete	High-quality	100	DTR
NC183_idba_266	34946	No	NA	58	19	1	Complete	High-quality	100	DTR
NC183_idba_270	34683	No	NA	55	17	2	Complete	High-quality	100	DTR
NC183_idba_278	33995	Yes	31704	58	22	2	Complete	High-quality	100	DTR
NC183_idba_291	32746	No	NA	50	18	1	Complete	High-quality	100	DTR
NC183_idba_632	16917	No	NA	22	8	0	Complete	High-quality	100	DTR
NC183_idba_1532	6193	No	NA	6	3	0	Complete	High-quality	100	DTR
NC185_idba_3	235011	No	NA	166	1	107	High-quality	High-quality	100	HMM-based
NC185_idba_80	78773	No	NA	113	15	0	Complete	High-quality	100	DTR
NC185_idba_168	56819	No	NA	82	12	4	High-quality	High-quality	90.94	AAI-based
NC185_idba_169	56608	No	NA	77	13	2	Complete	High-quality	100	DTR
NC185_idba_238	47051	No	NA	54	6	6	High-quality	High-quality	100	AAI-based
NC185_idba_367	37689	No	NA	68	12	1	Complete	High-quality	100	DTR
NC201_idba_6	170763	Yes	104563	148	6	81	High-quality	High-quality	96.97	HMM-based
NC201_idba_8	153268	No	NA	202	18	4	Complete	High-quality	100	ITR
NC201_idba_27	102755	No	NA	109	23	0	Complete	High-quality	100	DTR
NC201_idba_48	78353	No	NA	132	17	4	Complete	High-quality	100	DTR
NC201_idba_99	52908	No	NA	81	28	0	Complete	High-quality	100	DTR
NC201_idba_121	46160	No	NA	74	26	1	Complete	High-quality	100	DTR
NC201_idba_123	45991	No	NA	68	20	1	Complete	High-quality	100	DTR
NC201_idba_126	44962	No	NA	70	23	0	Complete	High-quality	100	DTR
NC201_idba_142	42416	No	NA	68	14	1	Complete	High-quality	100	ITR
NC201_idba_143	42192	No	NA	73	22	1	Complete	High-quality	100	DTR
NC201_idba_149	41514	No	NA	49	10	0	Complete	High-quality	100	DTR
NC201_idba_151	41333	No	NA	73	16	1	High-quality	High-quality	100	AAI-based
NC201_idba_156	40433	No	NA	53	27	2	Complete	High-quality	100	DTR
NC201_idba_217	33430	No	NA	44	8	1	Complete	High-quality	100	DTR
NC201_idba_241	30714	No	NA	26	5	0	Complete	High-quality	100	DTR
NC201_idba_245	29768	No	NA	46	14	0	Complete	High-quality	100	DTR
NC201_idba_1306	6394	No	NA	8	3	0	High-quality	High-quality	99.97	AAI-based
NC210_idba_213	42655	No	NA	69	9	1	Complete	High-quality	100	DTR
NC210_idba_237	38701	No	NA	54	11	0	High-quality	High-quality	99.85	AAI-based
NC210_idba_247	37877	No	NA	54	16	1	Complete	High-quality	100	DTR
NC210_idba_256	37180	No	NA	51	17	0	Complete	High-quality	100	DTR
NC210_idba_280	34301	No	NA	58	18	0	Complete	High-quality	100	DTR
NC210_idba_1178	7950	No	NA	8	4	0	High-quality	High-quality	100	AAI-based
NC210_idba_1478	6603	No	NA	9	3	0	Complete	High-quality	100	DTR
NC307_idba_1	521785	No	NA	458	1	332	High-quality	High-quality	100	HMM-based
NC307_idba_47	89932	No	NA	83	10	0	Complete	High-quality	100	DTR
NC307_idba_102	50211	No	NA	89	33	0	Complete	High-quality	100	DTR
NC307_idba_116	46106	No	NA	49	4	2	Complete	High-quality	100	DTR
NC307_idba_117	45586	No	NA	54	4	2	High-quality	High-quality	100	AAI-based
NC307_idba_124	42615	No	NA	76	19	0	Complete	High-quality	100	DTR
NC307_idba_131	40520	No	NA	53	10	3	Complete	High-quality	100	DTR
NC307_idba_138	38810	No	NA	59	14	1	High-quality	High-quality	99.36	AAI-based
NC308_idba_83	44576	No	NA	77	35	0	Complete	High-quality	100	ITR
NC308_idba_84	44522	No	NA	82	16	0	Complete	High-quality	100	DTR
NC308_idba_163	30429	No	NA	46	13	0	Complete	High-quality	100	ITR
NC317_idba_6	176330	No	NA	260	146	0	High-quality	High-quality	96.33	AAI-based
NC317_idba_8	164650	No	NA	191	33	1	High-quality	High-quality	100	AAI-based
NC317_idba_36	95167	No	NA	81	7	0	Complete	High-quality	100	DTR
NC317_idba_41	90667	No	NA	83	8	1	Complete	High-quality	100	DTR
NC317_idba_43	89597	No	NA	84	11	0	Complete	High-quality	100	DTR
NC317_idba_105	54944	No	NA	97	21	0	Complete	High-quality	100	DTR
NC317_idba_119	50041	No	NA	76	10	5	High-quality	High-quality	93.68	AAI-based
NC317_idba_146	45914	No	NA	83	16	0	High-quality	High-quality	100	AAI-based
NC317_idba_155	45021	No	NA	71	23	0	High-quality	High-quality	98.8	AAI-based
NC317_idba_249	36273	No	NA	58	10	1	Complete	High-quality	100	DTR
NC317_idba_255	35912	No	NA	58	12	2	High-quality	High-quality	93.64	AAI-based
NC317_idba_294	33444	No	NA	60	21	1	Complete	High-quality	100	DTR
NC317_idba_327	31596	No	NA	52	9	3	Complete	High-quality	100	DTR
NC318_idba_11	99595	No	NA	106	17	1	Complete	High-quality	100	DTR
NC318_idba_13	95926	No	NA	85	7	0	Complete	High-quality	100	DTR
NC318_idba_46	49843	No	NA	76	30	0	Complete	High-quality	100	DTR
NC318_idba_55	47109	No	NA	72	25	0	Complete	High-quality	100	DTR
NC318_idba_57	46622	No	NA	75	24	0	Complete	High-quality	100	DTR
NC318_idba_65	45057	No	NA	70	21	1	High-quality	High-quality	91.53	AAI-based
NC318_idba_69	43605	Yes	38345	64	17	5	High-quality	High-quality	99.88	AAI-based
NC318_idba_70	43244	No	NA	76	16	1	Complete	High-quality	100	DTR
NC326_idba_40	65583	No	NA	65	7	3	Complete	High-quality	100	DTR
NC326_idba_46	62940	Yes	57827	96	20	2	High-quality	High-quality	95.25	AAI-based
NC326_idba_95	45713	No	NA	67	22	0	Complete	High-quality	100	DTR
NC326_idba_121	41964	No	NA	44	8	1	Complete	High-quality	100	DTR
NC326_idba_122	41576	No	NA	47	7	1	Complete	High-quality	100	DTR
NC326_idba_123	41562	No	NA	59	20	2	Complete	High-quality	100	DTR
NC326_idba_124	41499	No	NA	74	23	0	Complete	High-quality	100	DTR
NC326_idba_131	39759	No	NA	35	7	0	Complete	High-quality	100	DTR
NC326_idba_138	38366	No	NA	62	22	1	Complete	High-quality	100	DTR
NC326_idba_142	37590	No	NA	57	16	0	Complete	High-quality	100	DTR
NC326_idba_146	37217	No	NA	39	6	0	High-quality	High-quality	97.11	AAI-based
NC326_idba_147	37183	No	NA	57	16	3	Complete	High-quality	100	DTR
NC326_idba_148	37079	No	NA	53	20	0	High-quality	High-quality	97.7	AAI-based
NC326_idba_169	34308	No	NA	65	23	1	Complete	High-quality	100	DTR
NC326_idba_171	34199	No	NA	48	13	0	Complete	High-quality	100	DTR
NC326_idba_176	33176	No	NA	61	25	2	High-quality	High-quality	90.53	AAI-based
NC326_idba_180	32637	No	NA	51	18	1	Complete	High-quality	100	DTR
NC326_idba_222	28654	No	NA	42	6	1	Complete	High-quality	100	DTR
NC326_idba_552	13630	No	NA	18	5	0	Complete	High-quality	100	ITR
NCF004_idba_50	100129	No	NA	106	22	0	Complete	High-quality	100	DTR
NCF004_idba_127	65046	No	NA	61	7	4	Complete	High-quality	100	DTR
NCF004_idba_144	59496	No	NA	96	21	3	Complete	High-quality	100	DTR
NCF004_idba_148	57860	No	NA	100	19	1	Complete	High-quality	100	DTR
NCF004_idba_159	56534	No	NA	89	18	0	High-quality	High-quality	100	AAI-based
NCF004_idba_166	54784	No	NA	96	19	1	Complete	High-quality	100	DTR
NCF004_idba_172	54172	No	NA	92	21	3	Complete	High-quality	100	DTR
NCF004_idba_182	53063	No	NA	97	19	0	Complete	High-quality	100	DTR
NCF004_idba_201	49827	No	NA	79	20	1	Complete	High-quality	100	DTR
NCF004_idba_213	48341	No	NA	70	33	0	High-quality	High-quality	100	AAI-based
NCF004_idba_243	44790	No	NA	56	9	1	Complete	High-quality	100	DTR
NCF004_idba_258	42695	No	NA	54	5	1	Complete	High-quality	100	DTR
NCF004_idba_263	42529	No	NA	76	20	2	Complete	High-quality	100	DTR
NCF004_idba_314	37627	No	NA	53	17	0	Complete	High-quality	100	DTR
NCF004_idba_322	36878	No	NA	48	10	0	High-quality	High-quality	94.11	AAI-based
NCF004_idba_352	35110	No	NA	45	22	1	Complete	High-quality	100	DTR
NCF004_idba_1723	9076	No	NA	8	4	0	High-quality	High-quality	100	AAI-based
NCF004_idba_2424	6455	No	NA	7	3	0	Complete	High-quality	100	DTR
NCF004_idba_2586	6032	No	NA	9	3	0	High-quality	High-quality	100	AAI-based
NCF004_idba_2723	5810	No	NA	9	4	0	Complete	High-quality	100	DTR
NCF006_idba_3	159785	No	NA	198	41	2	Complete	High-quality	100	DTR
NCF006_idba_5	148286	No	NA	210	41	3	Complete	High-quality	100	DTR
NCF006_idba_17	71831	No	NA	92	8	0	Complete	High-quality	100	DTR
NCF006_idba_35	61160	No	NA	91	35	1	High-quality	High-quality	99.63	AAI-based
NCF006_idba_37	60100	No	NA	94	32	1	Complete	High-quality	100	DTR
NCF006_idba_42	54113	No	NA	72	12	3	High-quality	High-quality	98.17	AAI-based
NCF006_idba_45	51252	No	NA	72	11	2	High-quality	High-quality	95.95	AAI-based
NCF006_idba_63	46014	No	NA	65	32	0	Complete	High-quality	100	DTR
NCF006_idba_72	43417	No	NA	66	21	0	Complete	High-quality	100	DTR
NCF006_idba_74	43021	No	NA	68	16	0	Complete	High-quality	100	DTR
NCF006_idba_80	41727	No	NA	52	35	1	Complete	High-quality	100	DTR
NCF006_idba_83	41412	No	NA	52	5	1	Complete	High-quality	100	DTR
NCF006_idba_84	41302	No	NA	60	22	2	Complete	High-quality	100	DTR
NCF006_idba_85	41111	No	NA	76	17	1	Complete	High-quality	100	DTR
NCF006_idba_86	40991	No	NA	47	10	0	Complete	High-quality	100	DTR
NCF006_idba_87	40817	No	NA	66	15	2	Complete	High-quality	100	DTR
NCF006_idba_89	40389	No	NA	39	8	1	High-quality	High-quality	94.3	AAI-based
NCF006_idba_91	39657	No	NA	59	9	2	High-quality	High-quality	100	AAI-based
NCF006_idba_96	38533	No	NA	47	16	0	Complete	High-quality	100	DTR
NCF006_idba_97	38478	No	NA	61	16	1	High-quality	High-quality	92.74	AAI-based
NCF006_idba_98	38314	No	NA	69	21	1	Complete	High-quality	100	DTR
NCF006_idba_102	38148	No	NA	60	11	0	Complete	High-quality	100	DTR
NCF006_idba_104	37954	No	NA	40	5	0	High-quality	High-quality	97.03	AAI-based
NCF006_idba_108	37653	No	NA	42	7	1	High-quality	High-quality	99.66	AAI-based
NCF006_idba_377	13942	No	NA	22	6	0	High-quality	High-quality	100	AAI-based
NCF009_idba_10	155996	No	NA	191	24	5	Complete	High-quality	100	DTR
NCF009_idba_26	100427	No	NA	94	3	58	High-quality	High-quality	100	HMM-based
NCF009_idba_39	83331	No	NA	121	24	1	High-quality	High-quality	98.13	AAI-based
NCF009_idba_63	65576	No	NA	65	7	3	High-quality	High-quality	100	AAI-based
NCF009_idba_81	59944	No	NA	89	34	1	High-quality	High-quality	98.08	AAI-based
NCF009_idba_103	50576	No	NA	77	21	1	High-quality	High-quality	92.48	AAI-based
NCF009_idba_108	49760	No	NA	72	16	1	High-quality	High-quality	95.45	AAI-based
NCF009_idba_147	42104	No	NA	69	15	1	Complete	High-quality	100	DTR
NCF009_idba_152	41352	No	NA	75	21	1	Complete	High-quality	100	DTR
NCF009_idba_157	40774	No	NA	59	21	1	Complete	High-quality	100	DTR
NCF009_idba_171	38401	No	NA	67	19	1	Complete	High-quality	100	DTR
NCF009_idba_220	32224	No	NA	27	5	0	Complete	High-quality	100	DTR
NCF009_idba_539	14090	No	NA	24	2	0	High-quality	High-quality	94.25	AAI-based
NCF009_idba_571	13459	No	NA	24	8	0	Complete	High-quality	100	DTR
NCF026_idba_2	189568	Yes	138817	204	20	32	High-quality	High-quality	93.5	HMM-based
NCF026_idba_6	156906	No	NA	209	17	4	Complete	High-quality	100	DTR
NCF026_idba_32	97237	No	NA	104	19	0	Complete	High-quality	100	DTR
NCF026_idba_36	94592	Yes	90325	91	11	5	Complete	High-quality	100	DTR
NCF026_idba_50	82840	No	NA	111	14	3	Complete	High-quality	100	DTR
NCF026_idba_149	49969	No	NA	47	1	23	High-quality	High-quality	100	AAI-based
NCF026_idba_155	49648	No	NA	82	16	1	High-quality	High-quality	100	AAI-based
NCF026_idba_164	47505	No	NA	58	1	28	High-quality	High-quality	100	AAI-based
NCF026_idba_180	45562	No	NA	75	20	1	High-quality	High-quality	100	AAI-based
NCF026_idba_186	44314	No	NA	72	15	1	Complete	High-quality	100	DTR
NCF026_idba_196	43414	No	NA	79	13	0	Complete	High-quality	100	DTR
NCF026_idba_202	42617	No	NA	73	19	1	Complete	High-quality	100	DTR
NCF026_idba_209	41347	No	NA	67	28	0	High-quality	High-quality	96.14	AAI-based
NCF026_idba_212	41265	No	NA	46	11	0	Complete	High-quality	100	DTR
NCF026_idba_278	34645	No	NA	47	20	1	High-quality	High-quality	98.55	AAI-based
NCF026_idba_280	34610	No	NA	61	17	1	Complete	High-quality	100	DTR
NCF041_idba_10	162287	No	NA	209	42	2	Complete	High-quality	100	DTR
NCF041_idba_40	102383	No	NA	102	14	1	Complete	High-quality	100	DTR
NCF041_idba_44	100437	No	NA	109	16	0	Complete	High-quality	100	DTR
NCF041_idba_99	71023	No	NA	105	15	2	Complete	High-quality	100	DTR
NCF041_idba_159	57163	Yes	55613	85	19	3	High-quality	High-quality	95.9	AAI-based
NCF041_idba_222	48469	No	NA	65	12	2	Complete	High-quality	100	DTR
NCF041_idba_235	47323	No	NA	80	32	1	Complete	High-quality	100	DTR
NCF041_idba_299	41531	No	NA	39	1	9	High-quality	High-quality	100	HMM-based
NCF041_idba_346	39224	No	NA	61	15	1	Complete	High-quality	100	DTR
NCF041_idba_402	36248	No	NA	53	19	2	Complete	High-quality	100	DTR
NCF041_idba_424	35269	No	NA	67	17	0	High-quality	High-quality	100	AAI-based
NCF041_idba_3357	6463	No	NA	12	1	0	High-quality	High-quality	94.33	AAI-based
NCF044_idba_4	130661	No	NA	178	34	3	Complete	High-quality	100	DTR
NCF044_idba_9	103706	No	NA	121	16	0	High-quality	High-quality	100	AAI-based
NCF044_idba_71	63868	Yes	57432	99	23	4	High-quality	High-quality	100	AAI-based
NCF044_idba_82	61519	No	NA	104	29	2	Complete	High-quality	100	DTR
NCF044_idba_95	56288	No	NA	92	21	2	Complete	High-quality	100	DTR
NCF044_idba_147	46645	No	NA	74	12	1	High-quality	High-quality	100	AAI-based
NCF044_idba_155	45780	No	NA	63	20	1	High-quality	High-quality	98.33	AAI-based
NCF044_idba_167	44687	No	NA	78	17	1	Complete	High-quality	100	DTR
NCF044_idba_177	43906	No	NA	56	20	0	High-quality	High-quality	100	AAI-based
NCF044_idba_191	42516	No	NA	75	19	0	Complete	High-quality	100	DTR
NCF044_idba_197	42190	No	NA	54	31	0	Complete	High-quality	100	DTR
NCF044_idba_206	41316	No	NA	55	7	0	High-quality	High-quality	95.73	AAI-based
NCF044_idba_217	40238	No	NA	70	24	0	High-quality	High-quality	91.92	AAI-based
NCF044_idba_221	39794	No	NA	41	4	1	Complete	High-quality	100	DTR
NCF044_idba_222	39627	No	NA	59	9	3	Complete	High-quality	100	DTR
NCF044_idba_223	39590	No	NA	51	40	0	Complete	High-quality	100	DTR
NCF044_idba_225	39459	No	NA	54	7	0	Complete	High-quality	100	DTR
NCF044_idba_232	39238	No	NA	61	18	1	High-quality	High-quality	100	AAI-based
NCF044_idba_234	39167	No	NA	60	15	0	Complete	High-quality	100	ITR
NCF044_idba_235	39143	No	NA	49	7	0	Complete	High-quality	100	DTR
NCF044_idba_239	38643	No	NA	47	10	0	High-quality	High-quality	93.36	AAI-based
NCF044_idba_244	38322	No	NA	43	4	1	Complete	High-quality	100	DTR
NCF044_idba_246	37910	No	NA	55	20	0	Complete	High-quality	100	DTR
NCF044_idba_247	37874	No	NA	49	23	0	Complete	High-quality	100	DTR
NCF044_idba_248	37825	No	NA	53	17	0	High-quality	High-quality	95.42	AAI-based
NCF044_idba_252	37316	No	NA	65	18	0	Complete	High-quality	100	DTR
NCF044_idba_277	36080	No	NA	58	17	1	High-quality	High-quality	100	AAI-based
NCF044_idba_281	35929	No	NA	53	4	0	High-quality	High-quality	92.02	AAI-based
NCF044_idba_295	35371	No	NA	52	14	0	High-quality	High-quality	90.26	AAI-based
NCF044_idba_297	35144	No	NA	52	16	0	Complete	High-quality	100	DTR
NCF044_idba_344	31811	No	NA	54	18	2	Complete	High-quality	100	DTR
NCF051_idba_1	397302	No	NA	292	1	220	High-quality	High-quality	100	HMM-based
NCF051_idba_17	109063	No	NA	158	33	0	Complete	High-quality	100	DTR
NCF051_idba_18	108232	No	NA	133	23	6	Complete	High-quality	100	DTR
NCF051_idba_22	100701	No	NA	100	14	1	Complete	High-quality	100	DTR
NCF051_idba_35	81622	No	NA	129	23	2	Complete	High-quality	100	DTR
NCF051_idba_36	79213	No	NA	106	11	1	Complete	High-quality	100	DTR
NCF051_idba_47	60227	No	NA	103	19	3	Complete	High-quality	100	DTR
NCF051_idba_48	59970	No	NA	88	34	1	High-quality	High-quality	99.89	AAI-based
NCF051_idba_49	59914	No	NA	93	34	0	High-quality	High-quality	98.56	AAI-based
NCF051_idba_57	54598	No	NA	78	26	1	Complete	High-quality	100	DTR
NCF051_idba_62	52860	No	NA	88	23	1	Complete	High-quality	100	DTR
NCF051_idba_63	51482	No	NA	78	28	0	Complete	High-quality	100	DTR
NCF051_idba_80	46418	No	NA	73	12	1	Complete	High-quality	100	DTR
NCF051_idba_84	45265	No	NA	62	12	1	Complete	High-quality	100	DTR
NCF051_idba_88	44786	No	NA	72	24	0	Complete	High-quality	100	DTR
NCF051_idba_90	44456	No	NA	76	17	0	Complete	High-quality	100	DTR
NCF051_idba_93	43371	No	NA	78	24	0	High-quality	High-quality	100	AAI-based
NCF051_idba_97	42368	No	NA	56	7	0	High-quality	High-quality	97.9	AAI-based
NCF051_idba_98	41889	No	NA	46	27	0	High-quality	High-quality	97.79	AAI-based
NCF051_idba_112	39281	No	NA	66	22	0	High-quality	High-quality	96.27	AAI-based
NCF051_idba_127	36099	No	NA	57	5	0	High-quality	High-quality	96.54	AAI-based
NCF051_idba_136	35084	No	NA	46	19	0	Complete	High-quality	100	DTR
NCF051_idba_884	6463	No	NA	6	3	0	Complete	High-quality	100	DTR
NCF055_idba_27	58968	No	NA	81	17	1	Complete	High-quality	100	DTR
NCF055_idba_32	55774	No	NA	82	12	4	High-quality	High-quality	100	AAI-based
NCF055_idba_34	53278	No	NA	80	30	0	Complete	High-quality	100	DTR
NCF055_idba_41	46657	No	NA	74	23	1	Complete	High-quality	100	DTR
NCF055_idba_43	46176	No	NA	64	31	0	Complete	High-quality	100	DTR
NCF055_idba_46	44301	No	NA	66	16	0	Complete	High-quality	100	DTR
NCF055_idba_59	39934	No	NA	58	10	2	Complete	High-quality	100	DTR
NCF055_idba_80	32780	No	NA	57	19	0	Complete	High-quality	100	DTR
NCF106_idba_15	112571	No	NA	147	16	5	High-quality	High-quality	100	AAI-based
NCF106_idba_150	53344	Yes	51538	82	20	2	High-quality	High-quality	93.99	AAI-based
NCF106_idba_192	47310	No	NA	83	26	0	High-quality	High-quality	100	AAI-based
NCF106_idba_229	44285	No	NA	52	25	1	Complete	High-quality	100	DTR
NCF106_idba_235	43940	No	NA	65	27	0	High-quality	High-quality	99.64	AAI-based
NCF106_idba_247	42912	No	NA	53	30	1	Complete	High-quality	100	DTR
NCF106_idba_273	40886	No	NA	53	17	0	High-quality	High-quality	100	AAI-based
NCF106_idba_344	35922	No	NA	56	20	0	Complete	High-quality	100	DTR
NCF106_idba_352	35544	No	NA	58	15	2	High-quality	High-quality	94.05	AAI-based
NCF106_idba_358	35270	No	NA	54	14	2	High-quality	High-quality	100	AAI-based
NCF106_idba_381	33780	No	NA	50	16	1	Complete	High-quality	100	ITR
NCF106_idba_411	32104	No	NA	48	13	0	Complete	High-quality	100	DTR
NCF168_idba_13	147084	No	NA	180	40	7	Complete	High-quality	100	DTR
NCF168_idba_34	105997	No	NA	132	21	4	Complete	High-quality	100	DTR
NCF168_idba_56	95859	No	NA	89	14	5	Complete	High-quality	100	DTR
NCF168_idba_189	58426	No	NA	53	1	25	High-quality	High-quality	100	HMM-based
NCF168_idba_281	47909	No	NA	80	24	1	High-quality	High-quality	99.45	AAI-based
NCF168_idba_294	46634	No	NA	71	23	1	Complete	High-quality	100	DTR
NCF168_idba_335	43767	No	NA	61	28	2	High-quality	High-quality	95.46	AAI-based
NCF168_idba_336	43715	No	NA	55	4	1	Complete	High-quality	100	DTR
NCF168_idba_358	42060	No	NA	58	23	2	High-quality	High-quality	100	AAI-based
NCF168_idba_371	41232	No	NA	73	19	0	Complete	High-quality	100	DTR
NCF168_idba_372	41179	No	NA	60	24	3	High-quality	High-quality	94.35	AAI-based
NCF168_idba_399	39772	No	NA	62	31	1	High-quality	High-quality	100	AAI-based
NCF168_idba_442	37845	No	NA	51	15	0	High-quality	High-quality	98.46	AAI-based
NCF168_idba_456	36916	No	NA	50	22	0	Complete	High-quality	100	DTR
NCF168_idba_460	36734	No	NA	45	19	0	Complete	High-quality	100	DTR
NCF168_idba_480	35828	No	NA	57	15	0	Complete	High-quality	100	DTR
NCF168_idba_506	34664	No	NA	60	19	0	High-quality	High-quality	100	AAI-based
NCF168_idba_509	34522	Yes	31865	54	20	2	Complete	High-quality	100	DTR
NCF168_idba_517	34081	No	NA	57	18	0	Complete	High-quality	100	DTR
NCF168_idba_536	33093	No	NA	59	26	1	Complete	High-quality	100	DTR
NCF168_idba_551	32552	No	NA	48	14	0	High-quality	High-quality	96.62	AAI-based
NCF171_idba_1	337362	No	NA	274	3	163	High-quality	High-quality	91.37	HMM-based
NCF171_idba_13	131415	No	NA	215	24	2	Complete	High-quality	100	DTR
NCF171_idba_60	78100	No	NA	113	14	0	Complete	High-quality	100	DTR
NCF171_idba_143	52791	No	NA	84	20	1	High-quality	High-quality	100	AAI-based
NCF171_idba_145	52548	No	NA	84	30	0	Complete	High-quality	100	DTR
NCF171_idba_161	49573	No	NA	85	34	0	Complete	High-quality	100	DTR
NCF171_idba_170	47455	No	NA	86	50	0	Complete	High-quality	100	DTR
NCF171_idba_196	44178	No	NA	66	20	0	Complete	High-quality	100	DTR
NCF171_idba_219	41301	No	NA	56	27	0	Complete	High-quality	100	DTR
NCF171_idba_220	40667	No	NA	59	21	0	Complete	High-quality	100	DTR
NCF171_idba_222	40441	No	NA	50	46	0	Complete	High-quality	100	DTR
NCF171_idba_228	40016	No	NA	63	19	2	Complete	High-quality	100	DTR
NCF171_idba_235	39063	No	NA	59	20	0	High-quality	High-quality	94.89	AAI-based
NCF171_idba_237	38896	No	NA	60	33	1	Complete	High-quality	100	DTR
NCF171_idba_252	37265	No	NA	58	15	0	High-quality	High-quality	97.5	AAI-based
NCF171_idba_256	37149	No	NA	54	11	1	High-quality	High-quality	94.03	AAI-based
NN0897_idba_24	147739	No	NA	204	39	3	Complete	High-quality	100	DTR
NN0897_idba_29	138466	No	NA	110	5	61	High-quality	High-quality	98.71	HMM-based
NN0897_idba_105	78240	No	NA	113	14	0	High-quality	High-quality	99.22	AAI-based
NN0897_idba_128	71334	No	NA	102	15	3	Complete	High-quality	100	DTR
NN0897_idba_193	54135	No	NA	88	16	4	Complete	High-quality	100	ITR
NN0897_idba_197	53658	No	NA	71	29	0	Complete	High-quality	100	DTR
NN0897_idba_267	45435	No	NA	67	28	1	High-quality	High-quality	96.89	AAI-based
NN0897_idba_292	43903	No	NA	73	30	3	Complete	High-quality	100	DTR
NN0897_idba_300	43076	No	NA	69	28	0	Complete	High-quality	100	DTR
NN0897_idba_303	42917	No	NA	64	18	0	High-quality	High-quality	92.42	AAI-based
NN0897_idba_327	41192	No	NA	53	28	1	Complete	High-quality	100	DTR
NN0897_idba_334	40648	No	NA	47	7	1	Complete	High-quality	100	DTR
NN0897_idba_336	40468	No	NA	50	20	0	High-quality	High-quality	92.23	AAI-based
NN0897_idba_343	39802	No	NA	50	9	1	Complete	High-quality	100	DTR
NN0897_idba_352	39340	No	NA	66	17	1	Complete	High-quality	100	DTR
NN0897_idba_383	37585	No	NA	59	26	0	Complete	High-quality	100	DTR
NN0897_idba_394	37051	No	NA	49	20	1	High-quality	High-quality	100	AAI-based
NN0897_idba_472	33317	No	NA	56	15	0	High-quality	High-quality	93.93	AAI-based
NN0897_idba_491	32456	No	NA	44	18	1	High-quality	High-quality	91.73	AAI-based
NN0897_idba_495	32194	No	NA	54	16	3	Complete	High-quality	100	DTR
NN0897_idba_496	32132	No	NA	42	10	1	Complete	High-quality	100	DTR
NN0897_idba_3211	5073	No	NA	10	0	0	Complete	High-quality	100	DTR						genes	detected	idba	NGS
QM01_idba_2	242837	No	NA	195	2	134	High-quality	High-quality	95.73	HMM-based
QM01_idba_4	218621	No	NA	182	1	137	High-quality	High-quality	100	HMM-based
QM01_idba_12	185053	No	NA	178	2	120	High-quality	High-quality	100	HMM-based
QM01_idba_80	86207	No	NA	114	13	2	Complete	High-quality	100	DTR
QM01_idba_94	80912	No	NA	129	26	2	Complete	High-quality	100	DTR
QM01_idba_177	57916	No	NA	76	12	3	Complete	High-quality	100	DTR
QM01_idba_221	49210	No	NA	91	19	0	High-quality	High-quality	100	AAI-based
QM01_idba_256	45281	No	NA	75	19	1	Complete	High-quality	100	DTR
QM01_idba_284	41872	No	NA	74	19	0	Complete	High-quality	100	DTR
QM01_idba_285	41685	No	NA	60	13	1	Complete	High-quality	100	DTR
QM01_idba_315	37375	No	NA	61	15	1	Complete	High-quality	100	DTR
QM01_idba_370	33091	No	NA	41	21	1	Complete	High-quality	100	DTR
QM02_idba_17	60677	No	NA	92	35	1	Complete	High-quality	100	DTR
QM02_idba_22	55955	No	NA	67	9	2	High-quality	High-quality	100	AAI-based
QM02_idba_41	40937	No	NA	56	14	1	Complete	High-quality	100	DTR
QM02_idba_43	39386	No	NA	42	16	0	Complete	High-quality	100	DTR
QM02_idba_45	38983	No	NA	59	25	0	Complete	High-quality	100	DTR
QM02_idba_47	37065	No	NA	52	23	0	Complete	High-quality	100	DTR
QM02_idba_51	35830	No	NA	53	24	0	Complete	High-quality	100	DTR
QM02_idba_52	34990	No	NA	61	19	1	Complete	High-quality	100	DTR
QM02_idba_55	34042	No	NA	49	41	0	Complete	High-quality	100	DTR
QM02_idba_112	17322	No	NA	20	4	0	Complete	High-quality	100	DTR
QM02_idba_190	10836	No	NA	13	2	0	Complete	High-quality	100	DTR
QM03_idba_2	371792	Yes	70023	376	23	225	High-quality	High-quality	90.34	HMM-based
QM03_idba_3	330287	No	NA	314	1	236	High-quality	High-quality	100	HMM-based
QM03_idba_15	171555	No	NA	204	28	4	Complete	High-quality	100	DTR
QM03_idba_22	137204	No	NA	181	36	6	High-quality	High-quality	100	AAI-based
QM03_idba_49	91674	No	NA	90	10	0	Complete	High-quality	100	DTR
QM03_idba_87	66056	No	NA	95	20	1	High-quality	High-quality	99.03	AAI-based
QM03_idba_111	60911	No	NA	92	20	2	Complete	High-quality	100	DTR
QM03_idba_130	57969	No	NA	89	34	2	Complete	High-quality	100	DTR
QM03_idba_157	52852	No	NA	82	19	1	Complete	High-quality	100	DTR
QM03_idba_188	47415	No	NA	59	18	1	Complete	High-quality	100	DTR
QM03_idba_200	45340	No	NA	54	3	2	Complete	High-quality	100	DTR
QM03_idba_208	44377	No	NA	60	45	0	Complete	High-quality	100	DTR
QM03_idba_220	43653	No	NA	45	5	3	High-quality	High-quality	100	AAI-based
QM03_idba_225	43194	No	NA	57	9	0	Complete	High-quality	100	DTR
QM03_idba_226	42948	No	NA	58	26	1	High-quality	High-quality	95.43	AAI-based
QM03_idba_233	42607	No	NA	68	27	0	Complete	High-quality	100	DTR
QM03_idba_243	40784	No	NA	57	26	1	High-quality	High-quality	100	AAI-based
QM03_idba_253	39421	No	NA	52	7	1	Complete	High-quality	100	DTR
QM03_idba_270	37742	No	NA	59	13	0	Complete	High-quality	100	DTR
QM03_idba_301	34867	No	NA	63	19	0	Complete	High-quality	100	DTR
QM03_idba_311	33881	No	NA	49	14	0	High-quality	High-quality	99.28	AAI-based
QM03_idba_314	33786	No	NA	55	10	1	High-quality	High-quality	98.6	AAI-based
QM03_idba_320	33166	No	NA	58	18	0	High-quality	High-quality	93.24	AAI-based
QM03_idba_505	22771	No	NA	35	12	0	High-quality	High-quality	93.52	AAI-based
QM03_idba_870	13724	No	NA	17	6	0	Complete	High-quality	100	ITR
QM03_idba_1999	5155	No	NA	10	5	0	High-quality	High-quality	98.39	AAI-based
QM04_idba_27	119984	No	NA	115	3	76	High-quality	High-quality	100	HMM-based
QM04_idba_67	83568	No	NA	89	0	54	High-quality	High-quality	100	AAI-based						genes	detected	idba	NGS
QM04_idba_98	68968	No	NA	105	17	2	Complete	High-quality	100	DTR
QM04_idba_106	66583	No	NA	107	19	3	High-quality	High-quality	100	AAI-based
QM04_idba_117	63218	No	NA	61	6	3	Complete	High-quality	100	DTR
QM04_idba_126	59904	No	NA	86	35	1	High-quality	High-quality	99.77	AAI-based
QM04_idba_149	54168	No	NA	83	30	1	High-quality	High-quality	100	AAI-based
QM04_idba_150	53875	No	NA	81	31	1	Complete	High-quality	100	DTR
QM04_idba_188	46112	No	NA	63	11	2	Complete	High-quality	100	DTR
QM04_idba_190	45846	No	NA	78	28	0	Complete	High-quality	100	DTR
QM04_idba_210	43044	No	NA	71	20	1	High-quality	High-quality	100	AAI-based
QM04_idba_259	37631	No	NA	70	15	0	High-quality	High-quality	100	AAI-based
QM04_idba_271	37053	No	NA	55	16	0	High-quality	High-quality	95.51	AAI-based
QM04_idba_284	36125	No	NA	53	13	0	Complete	High-quality	100	DTR
QM04_idba_300	35232	No	NA	48	10	0	Complete	High-quality	100	DTR
QM04_idba_338	31726	No	NA	50	16	0	High-quality	High-quality	98.71	AAI-based
QM07_idba_20	83427	No	NA	81	1	66	High-quality	High-quality	100	HMM-based
QM07_idba_51	57521	No	NA	89	15	2	Complete	High-quality	100	DTR
QM07_idba_59	54131	No	NA	66	15	3	Complete	High-quality	100	DTR
QM07_idba_79	47478	No	NA	75	26	0	Complete	High-quality	100	DTR
QM07_idba_84	46308	No	NA	60	10	1	Complete	High-quality	100	DTR
QM07_idba_85	46284	Yes	39053	80	21	3	High-quality	High-quality	100	AAI-based
QM07_idba_88	46093	No	NA	52	6	2	High-quality	High-quality	100	AAI-based
QM07_idba_95	45331	No	NA	70	29	3	High-quality	High-quality	96.67	AAI-based
QM07_idba_96	45048	No	NA	56	32	0	Complete	High-quality	100	DTR
QM07_idba_101	44081	No	NA	80	14	2	Complete	High-quality	100	DTR
QM07_idba_114	41829	No	NA	57	27	1	High-quality	High-quality	90.29	AAI-based
QM07_idba_115	41641	No	NA	66	27	0	High-quality	High-quality	96.97	AAI-based
QM07_idba_128	39879	No	NA	44	10	0	High-quality	High-quality	90.44	AAI-based
QM07_idba_160	36400	No	NA	51	20	1	Complete	High-quality	100	DTR
QM07_idba_178	33760	No	NA	60	17	1	Complete	High-quality	100	DTR
QM07_idba_181	33623	No	NA	55	17	1	Complete	High-quality	100	DTR
QM07_idba_184	33396	No	NA	55	19	0	High-quality	High-quality	99.67	AAI-based
QM07_idba_237	29068	No	NA	31	2	1	High-quality	High-quality	100	AAI-based
S02_idba_2	130657	No	NA	180	34	3	Complete	High-quality	100	DTR
S02_idba_3	130407	No	NA	172	34	6	High-quality	High-quality	95.2	AAI-based
S02_idba_14	95900	No	NA	90	9	6	Complete	High-quality	100	DTR
S02_idba_61	57546	No	NA	106	15	1	High-quality	High-quality	100	AAI-based
S02_idba_64	57204	No	NA	93	16	0	Complete	High-quality	100	DTR
S02_idba_65	55181	No	NA	99	19	1	Complete	High-quality	100	DTR
S02_idba_71	53058	Yes	47474	74	22	4	High-quality	High-quality	90.52	AAI-based
S02_idba_75	51939	No	NA	69	21	0	Complete	High-quality	100	DTR
S02_idba_94	48656	No	NA	87	27	0	Complete	High-quality	100	DTR
S02_idba_111	45927	No	NA	71	13	1	Complete	High-quality	100	DTR
S02_idba_126	44067	No	NA	62	17	0	Complete	High-quality	100	DTR
S02_idba_132	43764	No	NA	78	17	1	Complete	High-quality	100	DTR
S02_idba_133	43559	No	NA	53	22	1	Complete	High-quality	100	DTR
S02_idba_141	42955	No	NA	75	21	1	Complete	High-quality	100	DTR
S02_idba_146	42293	No	NA	54	5	1	High-quality	High-quality	99.2	AAI-based
S02_idba_156	41193	No	NA	47	10	0	High-quality	High-quality	98.16	AAI-based
S02_idba_157	40986	No	NA	60	12	3	Complete	High-quality	100	DTR
S02_idba_166	40397	No	NA	69	23	0	High-quality	High-quality	92.2	AAI-based
S02_idba_168	40228	No	NA	53	9	2	Complete	High-quality	100	DTR
S02_idba_169	40225	No	NA	64	26	0	Complete	High-quality	100	DTR
S02_idba_173	39738	No	NA	63	19	0	Complete	High-quality	100	DTR
S02_idba_178	39499	No	NA	58	22	1	Complete	High-quality	100	DTR
S02_idba_186	38950	No	NA	61	27	0	Complete	High-quality	100	DTR
S02_idba_187	38900	No	NA	48	9	1	High-quality	High-quality	95.77	AAI-based
S02_idba_188	38854	No	NA	63	11	0	Complete	High-quality	100	DTR
S02_idba_192	38434	No	NA	62	11	3	Complete	High-quality	100	DTR
S02_idba_224	36037	No	NA	77	15	0	High-quality	High-quality	99.92	AAI-based
S02_idba_225	36032	No	NA	53	18	1	High-quality	High-quality	97.06	AAI-based
S02_idba_248	34810	No	NA	52	4	0	Complete	High-quality	100	DTR
S02_idba_601	17949	No	NA	21	1	1	High-quality	High-quality	100	HMM-based
S02_idba_947	11940	No	NA	16	1	1	Complete	High-quality	100	DTR
S05_idba_6	183906	No	NA	217	20	8	Complete	High-quality	100	DTR
S05_idba_38	65195	No	NA	103	30	4	Complete	High-quality	100	DTR
S05_idba_48	58160	No	NA	85	13	4	Complete	High-quality	100	DTR
S05_idba_51	56178	Yes	52694	102	24	3	High-quality	High-quality	94.13	AAI-based
S05_idba_65	50754	No	NA	80	21	0	Complete	High-quality	100	DTR
S05_idba_105	37958	No	NA	73	17	0	Complete	High-quality	100	DTR
S05_idba_108	37129	No	NA	66	18	0	Complete	High-quality	100	DTR
S05_idba_115	36048	No	NA	55	20	0	Complete	High-quality	100	DTR
S05_idba_122	34246	No	NA	52	23	0	High-quality	High-quality	97.11	AAI-based
S05_idba_125	33791	No	NA	54	14	0	Complete	High-quality	100	DTR
S05_idba_673	6331	No	NA	6	3	0	Complete	High-quality	100	DTR
S08_idba_1	106721	No	NA	128	36	4	Complete	High-quality	100	DTR
S08_idba_2	100159	No	NA	101	16	1	High-quality	High-quality	100	AAI-based
S08_idba_5	58074	No	NA	86	11	4	Complete	High-quality	100	DTR
S08_idba_12	44340	No	NA	56	9	1	Complete	High-quality	100	DTR
S08_idba_15	42003	No	NA	60	28	2	Complete	High-quality	100	DTR
S08_idba_16	41861	No	NA	63	9	0	Complete	High-quality	100	DTR
S08_idba_33	30756	No	NA	45	15	1	Complete	High-quality	100	DTR
S11_idba_19	59946	No	NA	87	31	0	Complete	High-quality	100	DTR
S11_idba_56	38289	No	NA	55	15	0	Complete	High-quality	100	DTR
S11_idba_83	30622	No	NA	57	22	0	High-quality	High-quality	91.85	AAI-based
SK02_idba_98	70751	No	NA	103	16	3	Complete	High-quality	100	DTR
SK02_idba_195	48380	No	NA	69	21	0	Complete	High-quality	100	DTR
SK02_idba_220	44651	No	NA	76	21	0	Complete	High-quality	100	DTR
SK02_idba_233	42914	No	NA	68	20	0	High-quality	High-quality	99.8	AAI-based
SK02_idba_275	38968	No	NA	60	21	0	Complete	High-quality	100	DTR
SK02_idba_294	37188	No	NA	58	16	2	High-quality	High-quality	97.39	AAI-based
SK02_idba_305	36080	No	NA	52	20	1	Complete	High-quality	100	DTR
SK02_idba_306	35887	No	NA	57	20	0	Complete	High-quality	100	DTR
SK02_idba_2040	5346	No	NA	9	5	0	Complete	High-quality	100	DTR
SK03_idba_81	57437	No	NA	94	14	0	Complete	High-quality	100	DTR
SK03_idba_121	43529	No	NA	48	24	0	Complete	High-quality	100	DTR
SK03_idba_165	35703	No	NA	52	17	0	High-quality	High-quality	98.73	AAI-based
SK03_idba_186	32979	No	NA	52	20	0	Complete	High-quality	100	DTR
SK03_idba_900	6467	No	NA	9	4	0	Complete	High-quality	100	DTR
SK08_idba_7	100077	No	NA	110	15	1	High-quality	High-quality	100	AAI-based
SK08_idba_15	84174	No	NA	105	17	1	Complete	High-quality	100	DTR
SK08_idba_33	55861	No	NA	79	13	3	Complete	High-quality	100	DTR
SK08_idba_41	46777	No	NA	73	24	0	High-quality	High-quality	100	AAI-based
SK08_idba_49	40628	No	NA	58	8	1	Complete	High-quality	100	DTR
SK08_idba_50	40499	No	NA	59	12	2	Complete	High-quality	100	DTR
SK08_idba_52	39966	No	NA	55	14	1	Complete	High-quality	100	DTR
SK08_idba_55	37562	No	NA	65	16	1	High-quality	High-quality	93.25	AAI-based
SK08_idba_56	36718	No	NA	50	17	1	Complete	High-quality	100	DTR
SK08_idba_59	35971	No	NA	52	13	1	High-quality	High-quality	92.83	AAI-based
SK08_idba_72	32412	No	NA	50	17	1	High-quality	High-quality	100	AAI-based
SK08_idba_79	31160	No	NA	52	18	0	Complete	High-quality	100	DTR
SK08_idba_84	29720	No	NA	46	12	0	High-quality	High-quality	93.7	AAI-based
SK11_idba_28	65859	No	NA	103	30	4	Complete	High-quality	100	DTR
SK11_idba_36	59064	No	NA	86	16	3	High-quality	High-quality	98.92	AAI-based
SK11_idba_65	44326	No	NA	69	20	1	Complete	High-quality	100	DTR
SK11_idba_69	43548	No	NA	56	36	0	High-quality	High-quality	100	AAI-based
SK11_idba_78	41038	No	NA	44	10	1	High-quality	High-quality	95.81	AAI-based
SK11_idba_83	39476	No	NA	71	15	2	Complete	High-quality	100	DTR
SK11_idba_101	34897	No	NA	63	18	0	Complete	High-quality	100	DTR
SK12_idba_104	65163	No	NA	82	9	1	Complete	High-quality	100	DTR
SK12_idba_195	48401	No	NA	82	15	0	Complete	High-quality	100	DTR
SK12_idba_198	48127	No	NA	68	9	1	High-quality	High-quality	100	AAI-based
SK12_idba_222	45545	No	NA	70	29	0	Complete	High-quality	100	DTR
SK12_idba_229	44922	No	NA	76	14	2	Complete	High-quality	100	DTR
SK12_idba_249	43652	No	NA	65	26	1	Complete	High-quality	100	DTR
SK12_idba_251	43545	No	NA	58	28	0	Complete	High-quality	100	DTR
SK12_idba_257	43268	No	NA	62	18	2	High-quality	High-quality	100	AAI-based
SK12_idba_295	39811	No	NA	61	22	0	Complete	High-quality	100	DTR
SK12_idba_298	39763	No	NA	64	25	1	Complete	High-quality	100	DTR
SK12_idba_304	39372	No	NA	57	15	0	Complete	High-quality	100	DTR
SK12_idba_312	38765	No	NA	59	17	1	High-quality	High-quality	100	AAI-based
SK12_idba_314	38513	No	NA	59	19	1	Complete	High-quality	100	DTR
SK12_idba_329	37687	No	NA	52	18	0	Complete	High-quality	100	DTR
SK12_idba_364	35785	No	NA	50	25	1	Complete	High-quality	100	DTR
SK12_idba_452	30511	No	NA	49	17	2	High-quality	High-quality	90.19	AAI-based
SK12_idba_454	30373	No	NA	54	18	1	Complete	High-quality	100	DTR
SK14_idba_3	199500	No	NA	170	5	109	High-quality	High-quality	100	HMM-based
SK14_idba_9	100941	No	NA	102	13	1	Complete	High-quality	100	DTR
SK14_idba_33	57042	No	NA	90	23	0	High-quality	High-quality	100	AAI-based
SK14_idba_49	45509	No	NA	76	14	1	Complete	High-quality	100	DTR
SK14_idba_52	44628	No	NA	66	21	2	Complete	High-quality	100	DTR
SK14_idba_56	43561	No	NA	56	24	1	Complete	High-quality	100	DTR
SK14_idba_70	40946	No	NA	65	19	0	Complete	High-quality	100	DTR
SK14_idba_77	39638	No	NA	49	15	0	High-quality	High-quality	99.99	AAI-based
SK14_idba_84	37895	No	NA	42	5	1	Complete	High-quality	100	DTR
SK14_idba_93	35893	No	NA	46	7	1	High-quality	High-quality	95	AAI-based
SK14_idba_112	32564	No	NA	50	17	1	High-quality	High-quality	90.74	AAI-based
SK14_idba_305	14405	No	NA	18	7	1	High-quality	High-quality	100	AAI-based
SK20_idba_16	132036	No	NA	136	1	67	High-quality	High-quality	100	HMM-based
SK20_idba_17	131451	Yes	85983	148	8	31	High-quality	High-quality	91.08	HMM-based
SK20_idba_165	55459	No	NA	78	30	1	Complete	High-quality	100	DTR
SK20_idba_228	46635	No	NA	70	20	1	Complete	High-quality	100	DTR
SK20_idba_231	46370	No	NA	52	26	1	Complete	High-quality	100	DTR
SK20_idba_234	45953	No	NA	66	30	0	Complete	High-quality	100	DTR
SK20_idba_236	45800	No	NA	62	16	1	Complete	High-quality	100	DTR
SK20_idba_241	45527	No	NA	73	16	0	Complete	High-quality	100	DTR
SK20_idba_261	44320	No	NA	78	29	3	High-quality	High-quality	100	AAI-based
SK20_idba_282	42556	No	NA	76	13	1	Complete	High-quality	100	DTR
SK20_idba_284	42242	No	NA	58	26	0	High-quality	High-quality	100	AAI-based
SK20_idba_285	42132	No	NA	63	13	0	High-quality	High-quality	100	AAI-based
SK20_idba_287	41830	Yes	40145	60	6	2	Complete	High-quality	100	DTR
SK20_idba_293	41430	No	NA	56	33	0	Complete	High-quality	100	DTR
SK20_idba_318	39702	No	NA	53	30	1	Complete	High-quality	100	DTR
SK20_idba_319	39493	No	NA	49	15	1	Complete	High-quality	100	DTR
SK20_idba_321	39363	No	NA	47	6	0	Complete	High-quality	100	DTR
SK20_idba_350	37616	No	NA	69	14	3	High-quality	High-quality	98.13	AAI-based
SK20_idba_356	37411	No	NA	49	12	0	Complete	High-quality	100	DTR
SK20_idba_367	36739	No	NA	57	19	3	High-quality	High-quality	91.91	AAI-based
SK20_idba_371	36472	No	NA	59	21	1	Complete	High-quality	100	DTR
SK20_idba_379	36230	No	NA	58	24	0	Complete	High-quality	100	DTR
SK20_idba_383	36039	No	NA	54	17	0	High-quality	High-quality	98.82	AAI-based
SK20_idba_418	34405	No	NA	40	5	1	Complete	High-quality	100	DTR
SK20_idba_439	32980	No	NA	56	16	0	High-quality	High-quality	98.05	AAI-based
SK20_idba_1071	17165	No	NA	22	12	0	High-quality	High-quality	95.3	AAI-based
SK22_idba_16	138687	No	NA	186	8	8	Complete	High-quality	100	DTR
SK22_idba_103	64479	No	NA	94	15	2	Complete	High-quality	100	DTR
SK22_idba_141	52504	No	NA	61	2	16	High-quality	High-quality	100	AAI-based
SK27_idba_16	106537	No	NA	142	9	3	High-quality	High-quality	96.23	AAI-based
SK27_idba_56	72760	No	NA	111	19	1	High-quality	High-quality	100	AAI-based
SK27_idba_82	62633	No	NA	81	18	0	Complete	High-quality	100	DTR
SK27_idba_89	61143	No	NA	107	29	1	High-quality	High-quality	100	AAI-based
SK27_idba_93	60321	No	NA	45	0	13	High-quality	High-quality	100	AAI-based						genes	detected	idba	NGS
SK27_idba_133	53018	No	NA	92	23	0	Complete	High-quality	100	DTR
SK27_idba_145	51143	Yes	36706	65	16	5	High-quality	High-quality	99.06	AAI-based
SK27_idba_199	43339	No	NA	75	26	0	Complete	High-quality	100	DTR
SK27_idba_216	42408	No	NA	69	17	1	Complete	High-quality	100	DTR
SK27_idba_222	42184	No	NA	76	21	2	Complete	High-quality	100	DTR
SK27_idba_227	42066	No	NA	58	27	3	Complete	High-quality	100	DTR
SK27_idba_229	41930	No	NA	50	10	1	Complete	High-quality	100	DTR
SK27_idba_235	41294	No	NA	60	9	0	Complete	High-quality	100	DTR
SK27_idba_246	40362	No	NA	54	6	0	Complete	High-quality	100	DTR
SK27_idba_303	36743	No	NA	56	12	0	High-quality	High-quality	95.67	AAI-based
SK27_idba_305	36405	No	NA	56	13	1	High-quality	High-quality	100	AAI-based
SK27_idba_324	35378	No	NA	47	17	0	Complete	High-quality	100	DTR
SK27_idba_337	34736	No	NA	47	5	0	High-quality	High-quality	95.03	AAI-based
SK27_idba_356	33787	No	NA	51	4	0	Complete	High-quality	100	DTR
SK27_idba_729	19310	No	NA	32	4	1	Complete	High-quality	100	DTR
SK27_idba_2735	5125	No	NA	8	6	0	Complete	High-quality	100	DTR
SK43_idba_9	162802	No	NA	134	1	86	High-quality	High-quality	100	HMM-based
SK43_idba_16	127129	No	NA	104	1	70	High-quality	High-quality	100	HMM-based
SK43_idba_43	97825	No	NA	142	33	1	Complete	High-quality	100	DTR
SK43_idba_65	81075	No	NA	132	29	4	High-quality	High-quality	100	AAI-based
SK43_idba_94	66336	No	NA	77	13	2	Complete	High-quality	100	DTR
SK43_idba_143	50735	No	NA	70	18	0	High-quality	High-quality	96.2	AAI-based
SK43_idba_161	47216	No	NA	87	24	0	Complete	High-quality	100	DTR
SK43_idba_168	46517	No	NA	67	28	4	High-quality	High-quality	100	AAI-based
SK43_idba_194	43189	No	NA	58	10	1	Complete	High-quality	100	DTR
SK43_idba_206	41913	No	NA	68	16	1	High-quality	High-quality	97.74	AAI-based
SK43_idba_218	41042	No	NA	57	10	1	High-quality	High-quality	100	AAI-based
SK43_idba_222	40881	Yes	35081	58	15	4	High-quality	High-quality	96.38	AAI-based
SK43_idba_226	40394	No	NA	49	6	0	Complete	High-quality	100	DTR
SK43_idba_255	37536	No	NA	67	15	1	High-quality	High-quality	100	AAI-based
SK43_idba_1975	6241	No	NA	9	3	0	Complete	High-quality	100	DTR
SK44_idba_50	103934	No	NA	177	35	2	Complete	High-quality	100	DTR
SK44_idba_55	100716	No	NA	103	12	1	High-quality	High-quality	100	AAI-based
SK44_idba_100	78677	No	NA	114	16	0	Complete	High-quality	100	DTR
SK44_idba_146	64569	No	NA	65	8	2	High-quality	High-quality	100	AAI-based
SK44_idba_169	60575	No	NA	68	24	0	High-quality	High-quality	97.1	AAI-based
SK44_idba_179	59056	No	NA	75	18	0	Complete	High-quality	100	DTR
SK44_idba_181	58714	No	NA	91	23	0	High-quality	High-quality	96.75	AAI-based
SK44_idba_268	46296	No	NA	80	10	0	High-quality	High-quality	100	AAI-based
SK44_idba_280	45228	No	NA	79	37	1	Complete	High-quality	100	DTR
SK44_idba_281	45185	No	NA	67	8	1	Complete	High-quality	100	DTR
SK44_idba_296	43608	No	NA	74	26	0	Complete	High-quality	100	DTR
SK44_idba_307	43050	No	NA	56	29	0	High-quality	High-quality	100	AAI-based
SK44_idba_350	39998	No	NA	46	5	0	Complete	High-quality	100	DTR
SK44_idba_369	39047	No	NA	54	17	0	High-quality	High-quality	98.1	AAI-based
SK44_idba_370	39036	No	NA	53	12	1	Complete	High-quality	100	DTR
SK44_idba_371	39022	No	NA	53	25	0	Complete	High-quality	100	DTR
SK44_idba_398	37728	No	NA	65	16	4	Complete	High-quality	100	DTR
SK44_idba_424	36206	No	NA	51	22	0	High-quality	High-quality	100	AAI-based
SK44_idba_454	34289	No	NA	58	17	0	Complete	High-quality	100	DTR
SK44_idba_455	34254	No	NA	49	14	0	Complete	High-quality	100	DTR
SK44_idba_503	32469	No	NA	45	16	1	Complete	High-quality	100	DTR
SK44_idba_517	32051	No	NA	52	16	1	Complete	High-quality	100	DTR
SK51_idba_20	143497	No	NA	196	9	7	Complete	High-quality	100	DTR
SK51_idba_178	58341	Yes	55474	89	22	2	High-quality	High-quality	98.89	AAI-based
SK51_idba_181	57684	No	NA	80	14	2	High-quality	High-quality	99.72	AAI-based
SK51_idba_186	56345	No	NA	61	3	31	High-quality	High-quality	92.08	HMM-based
SK51_idba_223	49895	No	NA	66	18	0	Complete	High-quality	100	DTR
SK51_idba_271	43635	No	NA	44	8	2	High-quality	High-quality	100	AAI-based
SK51_idba_277	43177	No	NA	58	9	0	Complete	High-quality	100	DTR
SK51_idba_340	38401	No	NA	52	21	1	Complete	High-quality	100	DTR
SK51_idba_366	36236	No	NA	57	17	0	High-quality	High-quality	100	AAI-based
SK54_idba_40	107895	No	NA	133	21	5	Complete	High-quality	100	DTR
SK54_idba_47	103353	No	NA	97	17	1	Complete	High-quality	100	DTR
SK54_idba_56	97206	No	NA	83	7	0	Complete	High-quality	100	DTR
SK54_idba_61	93384	No	NA	88	8	1	Complete	High-quality	100	DTR
SK54_idba_92	78249	No	NA	120	29	2	Complete	High-quality	100	DTR
SK54_idba_127	65873	No	NA	65	7	2	Complete	High-quality	100	DTR
SK54_idba_168	55912	No	NA	99	19	1	Complete	High-quality	100	DTR
SK54_idba_181	53816	No	NA	75	13	2	High-quality	High-quality	90.25	AAI-based
SK54_idba_185	52838	No	NA	75	18	0	Complete	High-quality	100	DTR
SK54_idba_275	43041	No	NA	59	9	2	Complete	High-quality	100	DTR
SK54_idba_301	40919	No	NA	67	18	1	Complete	High-quality	100	DTR
SK54_idba_308	40164	No	NA	74	18	2	Complete	High-quality	100	DTR
SK54_idba_309	40157	No	NA	54	14	2	Complete	High-quality	100	DTR
SK54_idba_318	39409	No	NA	60	11	0	Complete	High-quality	100	DTR
SK54_idba_326	38965	No	NA	45	10	0	Complete	High-quality	100	DTR
SK54_idba_337	38227	No	NA	45	6	1	Complete	High-quality	100	DTR
SK54_idba_369	35765	No	NA	58	13	3	High-quality	High-quality	93.18	AAI-based
SK54_idba_389	34868	No	NA	56	20	0	High-quality	High-quality	97.03	AAI-based
SK54_idba_394	34566	No	NA	50	14	1	High-quality	High-quality	100	AAI-based
SK54_idba_2702	6240	No	NA	7	4	0	Complete	High-quality	100	DTR
SK54_idba_2761	6090	No	NA	9	3	0	Complete	High-quality	100	DTR
SK56_idba_24	131872	No	NA	108	5	70	High-quality	High-quality	98.19	HMM-based
SK56_idba_136	49963	No	NA	64	8	0	Complete	High-quality	100	DTR
SK56_idba_182	42187	No	NA	57	18	0	High-quality	High-quality	100	AAI-based
SK56_idba_183	42024	No	NA	61	13	1	Complete	High-quality	100	DTR
SK56_idba_198	40980	No	NA	61	24	1	High-quality	High-quality	100	AAI-based
SK56_idba_199	40960	No	NA	54	29	0	Complete	High-quality	100	DTR
SK56_idba_203	40354	No	NA	71	18	1	High-quality	High-quality	100	AAI-based
SK56_idba_252	35043	No	NA	50	13	1	Complete	High-quality	100	DTR
A01_megahit_166	95171	Yes	84889	88	11	5	Complete	High-quality	100	DTR
A01_megahit_185	45862	No	NA	68	12	1	Complete	High-quality	100	DTR
A01_megahit_387	39775	No	NA	69	15	0	Complete	High-quality	100	DTR
A01_megahit_512	46483	No	NA	64	14	3	Complete	High-quality	100	DTR
A01_megahit_671	118030	No	NA	148	35	2	Complete	High-quality	100	DTR
A01_megahit_790	57757	No	NA	102	21	5	Complete	High-quality	100	DTR
A01_megahit_861	96306	No	NA	90	11	0	Complete	High-quality	100	DTR
A01_megahit_1623	53522	No	NA	63	3	3	Complete	High-quality	100	DTR
A01_megahit_1761	50177	No	NA	63	12	1	High-quality	High-quality	98.91	AAI-based
A01_megahit_1910	72971	No	NA	90	13	1	Complete	High-quality	100	DTR
A01_megahit_1984	141235	No	NA	128	6	70	High-quality	High-quality	100	HMM-based
A01_megahit_2036	48427	No	NA	87	20	0	Complete	High-quality	100	DTR
A01_megahit_2072	41235	No	NA	52	7	0	Complete	High-quality	100	DTR
A01_megahit_2093	35318	No	NA	52	21	0	Complete	High-quality	100	DTR
A01_megahit_2171	34575	No	NA	60	12	0	High-quality	High-quality	94.13	AAI-based
A01_megahit_2221	51368	No	NA	90	18	0	High-quality	High-quality	100	AAI-based
A01_megahit_2341	92102	No	NA	95	14	0	Complete	High-quality	100	DTR
A01_megahit_2778	45393	No	NA	65	30	0	Complete	High-quality	100	DTR
A01_megahit_3022	38373	No	NA	47	7	0	Complete	High-quality	100	DTR
A01_megahit_3060	36374	No	NA	58	17	0	High-quality	High-quality	100	AAI-based
A01_megahit_3172	39561	No	NA	68	16	1	High-quality	High-quality	99.77	AAI-based
A01_megahit_3654	33753	No	NA	60	19	1	High-quality	High-quality	96.78	AAI-based
A01_megahit_4230	40608	No	NA	56	14	1	Complete	High-quality	100	DTR
A01_megahit_4395	42239	No	NA	62	8	1	Complete	High-quality	100	DTR
A01_megahit_4577	34568	No	NA	57	20	0	Complete	High-quality	100	DTR
A01_megahit_4959	46114	No	NA	77	18	0	Complete	High-quality	100	DTR
A01_megahit_5178	42934	No	NA	39	0	16	High-quality	High-quality	96.01	AAI-based						genes	detected	megahit	NGS
A01_megahit_5220	45403	No	NA	84	13	1	Complete	High-quality	100	DTR
A01_megahit_5610	41068	No	NA	70	16	0	Complete	High-quality	100	DTR
A01_megahit_5767	175728	No	NA	201	30	4	High-quality	High-quality	100	AAI-based
A01_megahit_5877	11141	No	NA	17	0	1	High-quality	High-quality	90.29	AAI-based						genes	detected	megahit	NGS
A01_megahit_6730	34824	No	NA	63	19	0	Complete	High-quality	100	DTR
A01_megahit_7125	103676	No	NA	134	19	4	High-quality	High-quality	97.57	AAI-based
A01_megahit_8553	38865	No	NA	77	18	1	Complete	High-quality	100	DTR
A01_megahit_8771	39592	No	NA	49	10	1	Complete	High-quality	100	DTR
A01_megahit_8775	46309	No	NA	61	5	0	Complete	High-quality	100	DTR
A01_megahit_8782	173075	No	NA	201	44	4	Complete	High-quality	100	DTR
A01_megahit_8786	60408	No	NA	102	19	3	Complete	High-quality	100	DTR
A01_megahit_8798	82448	No	NA	138	22	0	Complete	High-quality	100	DTR
A01_megahit_8805	138414	No	NA	185	34	7	Complete	High-quality	100	DTR
A01_megahit_8822	43335	No	NA	61	9	1	Complete	High-quality	100	DTR
A01_megahit_8824	42303	No	NA	45	9	1	Complete	High-quality	100	DTR
A01_megahit_8843	85974	No	NA	115	13	2	Complete	High-quality	100	DTR
A01_megahit_8846	39243	No	NA	51	18	1	Complete	High-quality	100	DTR
A01_megahit_8871	37241	No	NA	58	23	0	Complete	High-quality	100	DTR
A01_megahit_8879	35247	No	NA	55	15	0	Complete	High-quality	100	DTR
A01_megahit_8896	11487	No	NA	18	3	0	Complete	High-quality	100	DTR
A01_megahit_8908	51911	No	NA	81	13	0	Complete	High-quality	100	DTR
A01_megahit_8939	37139	No	NA	66	22	1	Complete	High-quality	100	DTR
A01_megahit_8947	35246	No	NA	59	18	1	Complete	High-quality	100	DTR
A01_megahit_9003	58480	No	NA	107	17	1	Complete	High-quality	100	DTR
A02_megahit_129	40780	No	NA	78	17	1	Complete	High-quality	100	DTR
A02_megahit_138	91623	No	NA	90	10	0	Complete	High-quality	100	DTR
A02_megahit_352	46795	No	NA	69	22	1	Complete	High-quality	100	DTR
A02_megahit_397	43539	No	NA	57	5	1	Complete	High-quality	100	DTR
A02_megahit_432	94131	No	NA	90	10	5	Complete	High-quality	100	DTR
A02_megahit_458	45467	No	NA	75	13	0	High-quality	High-quality	100	AAI-based
A02_megahit_581	45573	No	NA	60	11	1	Complete	High-quality	100	DTR
A02_megahit_685	247883	No	NA	234	2	171	High-quality	High-quality	100	HMM-based
A02_megahit_1017	40116	No	NA	60	23	2	Complete	High-quality	100	DTR
A02_megahit_1221	38383	No	NA	58	22	1	High-quality	High-quality	100	AAI-based
A02_megahit_1505	28101	No	NA	48	20	2	High-quality	High-quality	92.21	AAI-based
A02_megahit_1602	41020	No	NA	64	20	0	Complete	High-quality	100	DTR
A02_megahit_2048	56767	No	NA	94	22	2	Complete	High-quality	100	DTR
A02_megahit_2337	46273	No	NA	68	18	1	High-quality	High-quality	98.86	AAI-based
A02_megahit_2360	46283	No	NA	55	5	2	High-quality	High-quality	100	AAI-based
A02_megahit_2579	39649	No	NA	55	21	0	High-quality	High-quality	97.41	AAI-based
A02_megahit_3118	42592	No	NA	61	11	1	High-quality	High-quality	99.57	AAI-based
A02_megahit_3475	49682	No	NA	53	1	28	High-quality	High-quality	100	HMM-based
A02_megahit_4417	62091	No	NA	93	31	1	High-quality	High-quality	99.87	AAI-based
A02_megahit_4552	77086	No	NA	101	12	1	Complete	High-quality	100	DTR
A02_megahit_4557	40790	No	NA	53	3	0	Complete	High-quality	100	DTR
A02_megahit_4633	65063	No	NA	97	33	1	High-quality	High-quality	100	AAI-based
A02_megahit_4793	65896	No	NA	96	34	0	High-quality	High-quality	99.68	AAI-based
A02_megahit_5450	50393	No	NA	91	18	1	Complete	High-quality	100	DTR
A02_megahit_5835	44219	No	NA	51	11	0	Complete	High-quality	100	DTR
A02_megahit_5864	170479	No	NA	177	26	6	Complete	High-quality	100	DTR
A02_megahit_6144	40701	No	NA	39	7	1	High-quality	High-quality	95.03	AAI-based
A02_megahit_6189	62170	No	NA	99	20	0	High-quality	High-quality	99.46	AAI-based
A02_megahit_6300	65974	No	NA	101	29	4	Complete	High-quality	100	DTR
A02_megahit_6858	44143	No	NA	79	14	2	Complete	High-quality	100	DTR
A02_megahit_7315	79456	No	NA	99	13	0	Complete	High-quality	100	DTR
A02_megahit_7354	45871	No	NA	74	18	0	Complete	High-quality	100	DTR
A02_megahit_7704	81146	No	NA	122	27	5	Complete	High-quality	100	DTR
A02_megahit_8649	50044	No	NA	68	19	0	High-quality	High-quality	96.71	AAI-based
A02_megahit_9063	61988	No	NA	79	18	0	Complete	High-quality	100	DTR
A02_megahit_9122	40050	No	NA	65	20	1	Complete	High-quality	100	DTR
A02_megahit_9159	33627	No	NA	47	11	0	Complete	High-quality	100	DTR
A02_megahit_9239	59069	Yes	56027	102	16	3	Complete	High-quality	100	DTR
A02_megahit_9289	36901	No	NA	75	18	0	Complete	High-quality	100	DTR
A02_megahit_9400	129826	No	NA	182	34	3	Complete	High-quality	100	DTR
A02_megahit_9472	184050	No	NA	205	18	4	High-quality	High-quality	100	AAI-based
A02_megahit_9491	94533	No	NA	134	24	1	Complete	High-quality	100	DTR
A02_megahit_9549	48937	No	NA	77	29	1	Complete	High-quality	100	DTR
A02_megahit_9647	32242	No	NA	60	22	0	Complete	High-quality	100	DTR
A02_megahit_9701	45394	No	NA	73	23	0	Complete	High-quality	100	DTR
A02_megahit_9786	42485	No	NA	65	26	1	Complete	High-quality	100	DTR
A02_megahit_9810	43418	No	NA	46	15	0	High-quality	High-quality	98.63	AAI-based
A02_megahit_9908	42653	No	NA	55	14	1	Complete	High-quality	100	DTR
A02_megahit_9973	41147	No	NA	57	24	0	Complete	High-quality	100	DTR
A02_megahit_9984	40518	No	NA	62	16	1	High-quality	High-quality	97.84	AAI-based
A02_megahit_10011	39818	No	NA	56	22	0	Complete	High-quality	100	DTR
A02_megahit_10062	39315	No	NA	42	8	1	Complete	High-quality	100	DTR
A02_megahit_10102	43527	No	NA	63	19	1	Complete	High-quality	100	DTR
A02_megahit_10129	34915	No	NA	53	14	0	Complete	High-quality	100	DTR
A02_megahit_10178	48860	No	NA	67	12	1	Complete	High-quality	100	DTR
A02_megahit_10226	60904	No	NA	79	20	0	Complete	High-quality	100	DTR
A02_megahit_10293	94050	No	NA	94	11	1	Complete	High-quality	100	DTR
A02_megahit_10325	5097	No	NA	11	0	0	Complete	High-quality	100	DTR						genes	detected	megahit	NGS
A02_megahit_10335	5178	No	NA	8	5	0	Complete	High-quality	100	DTR
A08_megahit_202	36684	No	NA	50	7	1	Complete	High-quality	100	ITR
A08_megahit_346	185166	No	NA	221	21	7	Complete	High-quality	100	DTR
A08_megahit_407	35686	No	NA	59	20	0	Complete	High-quality	100	DTR
A08_megahit_848	86082	No	NA	111	15	2	Complete	High-quality	100	DTR
A08_megahit_923	100470	No	NA	99	13	1	Complete	High-quality	100	DTR
A08_megahit_972	51736	No	NA	84	11	1	High-quality	High-quality	91.85	AAI-based
A08_megahit_1030	111201	No	NA	110	2	66	High-quality	High-quality	94.31	HMM-based
A08_megahit_1045	37987	No	NA	49	23	2	High-quality	High-quality	100	AAI-based
A08_megahit_1166	40055	No	NA	50	27	1	Complete	High-quality	100	DTR
A08_megahit_1246	89971	No	NA	158	28	2	High-quality	High-quality	100	AAI-based
A08_megahit_1368	105134	No	NA	95	3	57	High-quality	High-quality	100	HMM-based
A08_megahit_1529	425453	No	NA	434	5	258	High-quality	High-quality	100	HMM-based
A08_megahit_1781	56151	No	NA	94	26	1	High-quality	High-quality	100	AAI-based
A08_megahit_1972	49825	No	NA	45	3	21	High-quality	High-quality	100	AAI-based
A08_megahit_2001	35105	No	NA	50	14	2	High-quality	High-quality	100	AAI-based
A08_megahit_2231	34244	No	NA	54	18	0	High-quality	High-quality	96.64	AAI-based
A08_megahit_2321	33947	No	NA	49	18	0	High-quality	High-quality	97.95	AAI-based
A08_megahit_2363	33573	No	NA	58	17	0	High-quality	High-quality	94.38	AAI-based
A08_megahit_2564	39910	No	NA	67	19	1	High-quality	High-quality	100	AAI-based
A08_megahit_2710	124693	No	NA	101	5	62	High-quality	High-quality	98.29	HMM-based
A08_megahit_3842	62490	No	NA	95	21	0	High-quality	High-quality	100	AAI-based
A08_megahit_3914	39440	No	NA	55	10	0	Complete	High-quality	100	DTR
A08_megahit_4209	185509	No	NA	215	31	2	Complete	High-quality	100	DTR
A08_megahit_4266	38824	No	NA	51	16	0	Complete	High-quality	100	DTR
A08_megahit_4288	39609	No	NA	58	20	0	Complete	High-quality	100	DTR
A08_megahit_4303	39125	No	NA	59	11	0	Complete	High-quality	100	DTR
A08_megahit_4320	43022	No	NA	55	16	0	Complete	High-quality	100	DTR
A08_megahit_4342	57300	No	NA	81	31	1	Complete	High-quality	100	DTR
A08_megahit_4344	37341	No	NA	50	11	0	Complete	High-quality	100	DTR
A08_megahit_4347	100114	No	NA	98	18	2	Complete	High-quality	100	DTR
A08_megahit_4348	28869	No	NA	41	15	0	Complete	High-quality	100	DTR
A08_megahit_4352	36299	No	NA	49	17	1	Complete	High-quality	100	DTR
A08_megahit_4353	40276	No	NA	62	21	2	Complete	High-quality	100	DTR
A08_megahit_4354	61993	No	NA	91	36	1	Complete	High-quality	100	DTR
A08_megahit_4355	138486	No	NA	187	36	6	Complete	High-quality	100	DTR
A08_megahit_4356	49783	No	NA	58	24	1	Complete	High-quality	100	DTR
A08_megahit_4359	5951	No	NA	6	3	0	Complete	High-quality	100	DTR
A09_megahit_464	113201	No	NA	116	3	39	High-quality	High-quality	100	HMM-based
A09_megahit_468	32303	No	NA	37	20	1	High-quality	High-quality	92.35	AAI-based
A09_megahit_698	44949	No	NA	76	16	1	Complete	High-quality	100	DTR
A09_megahit_1026	47183	No	NA	64	11	3	Complete	High-quality	100	DTR
A09_megahit_1051	67666	No	NA	76	9	1	Complete	High-quality	100	DTR
A09_megahit_1081	373918	No	NA	346	2	263	High-quality	High-quality	100	HMM-based
A09_megahit_1343	46424	No	NA	72	12	1	Complete	High-quality	100	DTR
A09_megahit_1446	175818	No	NA	208	44	4	Complete	High-quality	100	DTR
A09_megahit_1955	37040	No	NA	60	13	1	High-quality	High-quality	91.6	AAI-based
A09_megahit_2363	42104	No	NA	46	1	15	High-quality	High-quality	100	HMM-based
A09_megahit_2450	131224	No	NA	171	39	4	Complete	High-quality	100	DTR
A09_megahit_2712	198452	No	NA	168	6	86	High-quality	High-quality	97.98	HMM-based
A09_megahit_2847	40686	No	NA	52	7	0	Complete	High-quality	100	DTR
A09_megahit_3018	42349	No	NA	59	9	0	Complete	High-quality	100	DTR
A09_megahit_3619	24004	No	NA	36	19	0	High-quality	High-quality	94.78	AAI-based
A09_megahit_3691	64030	No	NA	100	14	0	High-quality	High-quality	93.3	AAI-based
A09_megahit_3992	42842	No	NA	47	15	0	Complete	High-quality	100	DTR
A09_megahit_4897	33328	No	NA	54	13	2	High-quality	High-quality	92.05	AAI-based
A09_megahit_4968	76916	No	NA	108	13	0	High-quality	High-quality	97.53	AAI-based
A09_megahit_5296	35761	No	NA	51	21	0	Complete	High-quality	100	DTR
A09_megahit_6091	49504	No	NA	92	22	0	Complete	High-quality	100	DTR
A09_megahit_6131	42578	No	NA	60	9	0	Complete	High-quality	100	DTR
A09_megahit_6168	48004	No	NA	83	19	1	Complete	High-quality	100	DTR
A09_megahit_6189	43943	No	NA	57	8	0	Complete	High-quality	100	DTR
A09_megahit_6227	44354	No	NA	68	14	0	Complete	High-quality	100	DTR
A09_megahit_6240	39592	No	NA	49	10	1	Complete	High-quality	100	DTR
[truncated: 16,250 more rows]

## Sheet: Ta-vOTUs
contig_id	contig_length	provirus	proviral_length	gene_count	viral_genes	host_genes	checkv_quality	miuvig_quality	completeness	completeness_method	family	N50
[truncated: 6,000 more rows]
[truncated: 9 more columns]
